# Supplementary material for: Accurate reconstruction of bacterial pan- and core- genomes with PEPPAN
Source: bioRxiv preprint, doi:10.1101/2020.01.03.894154, version 3 (2020-06-28)
Supplement: Supplemental Table S7 [file 894154_file17.xlsx]

## Sheet: Table S7
Supplemental Table S7. 14,115 Streptococcus genomes deposited in RefSeq (Jun 20, 2019)
Assembly accession	Representative set?	ANI 95% cluster	Bioproject	Biosample	Primate isolates?	RefSeq Category	Revised species designation	Species group	Organism name	Strain	Assembly status	Release date	Submitter	Ftp path in GenBank
GCF_000743015.1	Y	MG_1	PRJNA224116	SAMN02905033	F	na	Streptococcus pyogenes	Pyogenic	Streptococcus pyogenes	ATCC 19615	Complete	2014/08/22	Los Alamos National Laboratory	ftp://ftp.ncbi.nlm.nih.gov/genomes/all/GCF/000/743/015/GCF_000743015.1_ASM74301v1
GCF_000756485.1	Y	MG_1	PRJNA224116	SAMN02800743	F	na	Streptococcus pyogenes	Pyogenic	Streptococcus pyogenes	M23ND	Complete	2014/09/22	University of Notre Dame	ftp://ftp.ncbi.nlm.nih.gov/genomes/all/GCF/000/756/485/GCF_000756485.1_ASM75648v1
GCF_000772245.1	Y	MG_1	PRJNA224116	SAMN02649402	F	na	Streptococcus pyogenes	Pyogenic	Streptococcus pyogenes	1E1	Complete	2014/11/05	University Rennes1	ftp://ftp.ncbi.nlm.nih.gov/genomes/all/GCF/000/772/245/GCF_000772245.1_ASM77224v1
GCF_000993765.1	Y	MG_1	PRJNA224116	SAMN02716635	F	na	Streptococcus pyogenes	Pyogenic	Streptococcus pyogenes	AP1	Complete	2015/05/07	COMBACTE	ftp://ftp.ncbi.nlm.nih.gov/genomes/all/GCF/000/993/765/GCF_000993765.1_ASM99376v1
GCF_001019635.1	Y	MG_1	PRJNA224116	SAMN02715744	F	na	Streptococcus pyogenes	Pyogenic	Streptococcus pyogenes	NGAS743	Complete	2015/06/03	Public Health Ontario	ftp://ftp.ncbi.nlm.nih.gov/genomes/all/GCF/001/019/635/GCF_001019635.1_ASM101963v1
GCF_001019675.1	Y	MG_1	PRJNA224116	SAMN02715758	F	na	Streptococcus pyogenes	Pyogenic	Streptococcus pyogenes	NGAS596	Complete	2015/06/03	Public Health Ontario	ftp://ftp.ncbi.nlm.nih.gov/genomes/all/GCF/001/019/675/GCF_001019675.1_ASM101967v1
GCF_001039695.1	Y	MG_1	PRJNA224116	SAMEA3865279	F	na	Streptococcus pyogenes	Pyogenic	Streptococcus pyogenes	H293	Complete	2015/06/20	ICL-CFB	ftp://ftp.ncbi.nlm.nih.gov/genomes/all/GCF/001/039/695/GCF_001039695.1_emm89-1
GCF_001267805.1	Y	MG_1	PRJNA224116	SAMN03274509	F	na	Streptococcus pyogenes	Pyogenic	Streptococcus pyogenes	NGAS322	Complete	2015/08/17	Public Health Ontario	ftp://ftp.ncbi.nlm.nih.gov/genomes/all/GCF/001/267/805/GCF_001267805.1_ASM126780v1
GCF_001267845.1	Y	MG_1	PRJNA224116	SAMN03274510	F	na	Streptococcus pyogenes	Pyogenic	Streptococcus pyogenes	NGAS638	Complete	2015/08/17	Public Health Ontario	ftp://ftp.ncbi.nlm.nih.gov/genomes/all/GCF/001/267/845/GCF_001267845.1_ASM126784v1
GCF_001635895.1	Y	MG_1	PRJNA224116	SAMN03792044	F	na	Streptococcus pyogenes	Pyogenic	Streptococcus pyogenes	MGAS11027	Complete	2016/05/02	The Methodist Hospital Research Institute	ftp://ftp.ncbi.nlm.nih.gov/genomes/all/GCF/001/635/895/GCF_001635895.1_ASM163589v1
GCF_001638405.1	Y	MG_1	PRJNA224116	SAMN03988123	F	na	Streptococcus pyogenes	Pyogenic	Streptococcus pyogenes	SST1024-1	Scaffold	2016/05/06	Menzies School of Health Research	ftp://ftp.ncbi.nlm.nih.gov/genomes/all/GCF/001/638/405/GCF_001638405.1_ASM163840v1
GCF_001638585.1	Y	MG_1	PRJNA224116	SAMN03988132	F	na	Streptococcus pyogenes	Pyogenic	Streptococcus pyogenes	SST2102-1	Scaffold	2016/05/06	Menzies School of Health Research	ftp://ftp.ncbi.nlm.nih.gov/genomes/all/GCF/001/638/585/GCF_001638585.1_ASM163858v1
GCF_001638625.1	Y	MG_1	PRJNA224116	SAMN03988133	F	na	Streptococcus pyogenes	Pyogenic	Streptococcus pyogenes	SST2103-1	Contig	2016/05/06	Menzies School of Health Research	ftp://ftp.ncbi.nlm.nih.gov/genomes/all/GCF/001/638/625/GCF_001638625.1_ASM163862v1
GCF_001638725.1	Y	MG_1	PRJNA224116	SAMN03988145	F	na	Streptococcus pyogenes	Pyogenic	Streptococcus pyogenes	SST2233-1	Scaffold	2016/05/06	Menzies School of Health Research	ftp://ftp.ncbi.nlm.nih.gov/genomes/all/GCF/001/638/725/GCF_001638725.1_ASM163872v1
GCF_001638845.2	Y	MG_1	PRJNA224116	SAMN04625972	F	na	Streptococcus pyogenes	Pyogenic	Streptococcus pyogenes	NS53	Complete	2017/01/24	University of Notre Dame	ftp://ftp.ncbi.nlm.nih.gov/genomes/all/GCF/001/638/845/GCF_001638845.2_ASM163884v2
GCF_001640945.2	Y	MG_1	PRJNA224116	SAMN04456596	F	na	Streptococcus pyogenes	Pyogenic	Streptococcus pyogenes	STAB13021	Chromosome	2016/07/28	university of rennes1	ftp://ftp.ncbi.nlm.nih.gov/genomes/all/GCF/001/640/945/GCF_001640945.2_ASM164094v2
GCF_001642125.1	Y	MG_1	PRJNA224116	SAMN04457850	F	na	Streptococcus pyogenes	Pyogenic	Streptococcus pyogenes	157	Contig	2016/05/11	University of Camerino	ftp://ftp.ncbi.nlm.nih.gov/genomes/all/GCF/001/642/125/GCF_001642125.1_ASM164212v1
GCF_001642135.1	Y	MG_1	PRJNA224116	SAMN04457490	F	na	Streptococcus pyogenes	Pyogenic	Streptococcus pyogenes	154	Contig	2016/05/11	University of Camerino	ftp://ftp.ncbi.nlm.nih.gov/genomes/all/GCF/001/642/135/GCF_001642135.1_ASM164213v1
GCF_001642205.1	Y	MG_1	PRJNA224116	SAMN04457846	F	na	Streptococcus pyogenes	Pyogenic	Streptococcus pyogenes	156	Contig	2016/05/11	University of Camerino	ftp://ftp.ncbi.nlm.nih.gov/genomes/all/GCF/001/642/205/GCF_001642205.1_ASM164220v1
GCF_002115505.1	Y	MG_1	PRJNA224116	SAMN06671848	F	na	Streptococcus pyogenes	Pyogenic	Streptococcus pyogenes	WB136	Contig	2017/04/28	UNIVERSIDADE FEDERAL DE CIENCIAS DA SAUDE DE PORTO ALEGRE	ftp://ftp.ncbi.nlm.nih.gov/genomes/all/GCF/002/115/505/GCF_002115505.1_ASM211550v1
GCF_002163545.1	Y	MG_1	PRJNA224116	SAMN04500791	F	na	Streptococcus pyogenes	Pyogenic	Streptococcus pyogenes	STAB14018	Complete	2017/06/02	university of rennes1	ftp://ftp.ncbi.nlm.nih.gov/genomes/all/GCF/002/163/545/GCF_002163545.1_ASM216354v1
GCF_002236855.1	Y	MG_1	PRJNA224116	SAMN06435541	F	na	Streptococcus pyogenes	Pyogenic	Streptococcus pyogenes	GURSA1	Complete	2017/07/28	University of Copenhagen	ftp://ftp.ncbi.nlm.nih.gov/genomes/all/GCF/002/236/855/GCF_002236855.1_ASM223685v1
GCF_002250265.1	Y	MG_1	PRJNA224116	SAMN06701846	F	na	Streptococcus pyogenes	Pyogenic	Streptococcus pyogenes	spy0390	Scaffold	2017/08/14	Shanghai CDC	ftp://ftp.ncbi.nlm.nih.gov/genomes/all/GCF/002/250/265/GCF_002250265.1_ASM225026v1
GCF_002844355.1	Y	MG_1	PRJNA224116	SAMN07174848	F	na	Streptococcus pyogenes	Pyogenic	Streptococcus pyogenes	JS12	Complete	2017/12/18	National University of Singapore and Genome Institute of Singapore	ftp://ftp.ncbi.nlm.nih.gov/genomes/all/GCF/002/844/355/GCF_002844355.1_ASM284435v1
GCF_003171595.1	Y	MG_1	PRJNA224116	SAMN09206647	F	na	Streptococcus pyogenes	Pyogenic	Streptococcus pyogenes	SS1574	Contig	2018/05/25	University of Notre Dame	ftp://ftp.ncbi.nlm.nih.gov/genomes/all/GCF/003/171/595/GCF_003171595.1_ASM317159v1
GCF_003176935.1	Y	MG_1	PRJNA224116	SAMN09206645	F	na	Streptococcus pyogenes	Pyogenic	Streptococcus pyogenes	SS1448	Contig	2018/05/30	University of Notre Dame	ftp://ftp.ncbi.nlm.nih.gov/genomes/all/GCF/003/176/935/GCF_003176935.1_ASM317693v1
GCF_003203475.1	Y	MG_1	PRJNA224116	SAMN08569881	F	na	Streptococcus pyogenes	Pyogenic	Streptococcus pyogenes	NGAS979	Complete	2018/06/08	Public Health Ontario	ftp://ftp.ncbi.nlm.nih.gov/genomes/all/GCF/003/203/475/GCF_003203475.1_ASM320347v1
GCF_003597545.1	Y	MG_1	PRJNA224116	SAMN09977091	F	na	Streptococcus pyogenes	Pyogenic	Streptococcus pyogenes	B18039976	Contig	2018/09/24	Austrian Agency for Health and Food Safety	ftp://ftp.ncbi.nlm.nih.gov/genomes/all/GCF/003/597/545/GCF_003597545.1_ASM359754v1
GCF_003640605.1	Y	MG_1	PRJNA224116	SAMN04230441	F	na	Streptococcus pyogenes	Pyogenic	Streptococcus pyogenes	SASM4-Duke	Complete	2018/10/12	Baylor College of Medicine	ftp://ftp.ncbi.nlm.nih.gov/genomes/all/GCF/003/640/605/GCF_003640605.1_ASM364060v1
GCF_004114635.1	Y	MG_1	PRJNA224116	SAMN10769286	F	na	Streptococcus pyogenes	Pyogenic	Streptococcus pyogenes	SC23	Contig	2019/01/27	UNIVERSIDADE FEDERAL DE CIENCIAS DA SAUDE DE PORTO ALEGRE	ftp://ftp.ncbi.nlm.nih.gov/genomes/all/GCF/004/114/635/GCF_004114635.1_ASM411463v1
GCF_004122895.1	Y	MG_1	PRJNA224116	SAMN10769263	F	na	Streptococcus pyogenes	Pyogenic	Streptococcus pyogenes	SC18	Contig	2019/01/30	UNIVERSIDADE FEDERAL DE CIENCIAS DA SAUDE DE PORTO ALEGRE	ftp://ftp.ncbi.nlm.nih.gov/genomes/all/GCF/004/122/895/GCF_004122895.1_ASM412289v1
GCF_004124015.1	Y	MG_1	PRJNA224116	SAMN10172691	F	na	Streptococcus pyogenes	Pyogenic	Streptococcus pyogenes	TSPY556	Complete	2019/01/31	UTHSC/McGovern Medical School	ftp://ftp.ncbi.nlm.nih.gov/genomes/all/GCF/004/124/015/GCF_004124015.1_ASM412401v1
GCF_004124075.1	Y	MG_1	PRJNA224116	SAMN10172674	F	na	Streptococcus pyogenes	Pyogenic	Streptococcus pyogenes	TSPY453	Complete	2019/01/31	UTHSC/McGovern Medical School	ftp://ftp.ncbi.nlm.nih.gov/genomes/all/GCF/004/124/075/GCF_004124075.1_ASM412407v1
GCF_004124115.1	Y	MG_1	PRJNA224116	SAMN10172651	F	na	Streptococcus pyogenes	Pyogenic	Streptococcus pyogenes	TSPY208	Complete	2019/01/31	UTHSC/McGovern Medical School	ftp://ftp.ncbi.nlm.nih.gov/genomes/all/GCF/004/124/115/GCF_004124115.1_ASM412411v1
GCF_004124135.1	Y	MG_1	PRJNA224116	SAMN10172669	F	na	Streptococcus pyogenes	Pyogenic	Streptococcus pyogenes	TSPY165	Complete	2019/01/31	UTHSC/McGovern Medical School	ftp://ftp.ncbi.nlm.nih.gov/genomes/all/GCF/004/124/135/GCF_004124135.1_ASM412413v1
GCF_004154005.1	Y	MG_1	PRJNA224116	SAMN08555522	F	na	Streptococcus pyogenes	Pyogenic	Streptococcus pyogenes	MGAS7888	Complete	2019/02/11	Houston Methodist Research Institute	ftp://ftp.ncbi.nlm.nih.gov/genomes/all/GCF/004/154/005/GCF_004154005.1_ASM415400v1
GCF_004154045.1	Y	MG_1	PRJNA224116	SAMN08563018	F	na	Streptococcus pyogenes	Pyogenic	Streptococcus pyogenes	MGAS29326	Complete	2019/02/11	Houston Methodist Research Institute	ftp://ftp.ncbi.nlm.nih.gov/genomes/all/GCF/004/154/045/GCF_004154045.1_ASM415404v1
GCF_005160925.1	Y	MG_1	PRJNA224116	SAMN10793324	F	na	Streptococcus pyogenes	Pyogenic	Streptococcus pyogenes	emm55	Complete	2019/05/06	University of Melbourne	ftp://ftp.ncbi.nlm.nih.gov/genomes/all/GCF/005/160/925/GCF_005160925.1_ASM516092v1
GCF_005161465.1	Y	MG_1	PRJNA224116	SAMN10793317	F	na	Streptococcus pyogenes	Pyogenic	Streptococcus pyogenes	emm78.3	Complete	2019/05/06	University of Melbourne	ftp://ftp.ncbi.nlm.nih.gov/genomes/all/GCF/005/161/465/GCF_005161465.1_ASM516146v1
GCF_005161605.1	Y	MG_1	PRJNA224116	SAMN10793316	F	na	Streptococcus pyogenes	Pyogenic	Streptococcus pyogenes	emm22.8	Complete	2019/05/06	University of Melbourne	ftp://ftp.ncbi.nlm.nih.gov/genomes/all/GCF/005/161/605/GCF_005161605.1_ASM516160v1
GCF_005161985.1	Y	MG_1	PRJNA224116	SAMN10793311	F	na	Streptococcus pyogenes	Pyogenic	Streptococcus pyogenes	emm58	Complete	2019/05/06	University of Melbourne	ftp://ftp.ncbi.nlm.nih.gov/genomes/all/GCF/005/161/985/GCF_005161985.1_ASM516198v1
GCF_005162245.1	Y	MG_1	PRJNA224116	SAMN10793307	F	na	Streptococcus pyogenes	Pyogenic	Streptococcus pyogenes	emm97.1	Complete	2019/05/06	University of Melbourne	ftp://ftp.ncbi.nlm.nih.gov/genomes/all/GCF/005/162/245/GCF_005162245.1_ASM516224v1
GCF_005163085.1	Y	MG_1	PRJNA224116	SAMN10793302	F	na	Streptococcus pyogenes	Pyogenic	Streptococcus pyogenes	emm123	Complete	2019/05/06	University of Melbourne	ftp://ftp.ncbi.nlm.nih.gov/genomes/all/GCF/005/163/085/GCF_005163085.1_ASM516308v1
GCF_005163565.1	Y	MG_1	PRJNA224116	SAMN10793322	F	na	Streptococcus pyogenes	Pyogenic	Streptococcus pyogenes	emm11	Complete	2019/05/06	University of Melbourne	ftp://ftp.ncbi.nlm.nih.gov/genomes/all/GCF/005/163/565/GCF_005163565.1_ASM516356v1
GCF_005163865.1	Y	MG_1	PRJNA224116	SAMN10793320	F	na	Streptococcus pyogenes	Pyogenic	Streptococcus pyogenes	emm75.1	Complete	2019/05/06	University of Melbourne	ftp://ftp.ncbi.nlm.nih.gov/genomes/all/GCF/005/163/865/GCF_005163865.1_ASM516386v1
GCF_005164305.1	Y	MG_1	PRJNA224116	SAMN10793315	F	na	Streptococcus pyogenes	Pyogenic	Streptococcus pyogenes	emm77	Complete	2019/05/06	University of Melbourne	ftp://ftp.ncbi.nlm.nih.gov/genomes/all/GCF/005/164/305/GCF_005164305.1_ASM516430v1
GCF_005164705.1	Y	MG_1	PRJNA224116	SAMN10793312	F	na	Streptococcus pyogenes	Pyogenic	Streptococcus pyogenes	emm25	Complete	2019/05/06	University of Melbourne	ftp://ftp.ncbi.nlm.nih.gov/genomes/all/GCF/005/164/705/GCF_005164705.1_ASM516470v1
GCF_005164885.1	Y	MG_1	PRJNA224116	SAMN10793310	F	na	Streptococcus pyogenes	Pyogenic	Streptococcus pyogenes	emm90.5	Complete	2019/05/06	University of Melbourne	ftp://ftp.ncbi.nlm.nih.gov/genomes/all/GCF/005/164/885/GCF_005164885.1_ASM516488v1
GCF_005165385.1	Y	MG_1	PRJNA224116	SAMN10793299	F	na	Streptococcus pyogenes	Pyogenic	Streptococcus pyogenes	emm197	Complete	2019/05/06	University of Melbourne	ftp://ftp.ncbi.nlm.nih.gov/genomes/all/GCF/005/165/385/GCF_005165385.1_ASM516538v1
GCF_900106395.1	Y	MG_1	PRJNA224116	SAMEA4520969	F	na	Streptococcus pyogenes	Pyogenic	Streptococcus pyogenes	ISR	Contig	2017/01/25	CHUV-UNIL	ftp://ftp.ncbi.nlm.nih.gov/genomes/all/GCF/900/106/395/GCF_900106395.1_SP_ISR8
GCF_900459715.1	Y	MG_1	PRJNA224116	SAMEA3871793	F	na	Streptococcus pyogenes	Pyogenic	Streptococcus pyogenes	NCTC13741	Contig	2018/07/31	SC	ftp://ftp.ncbi.nlm.nih.gov/genomes/all/GCF/900/459/715/GCF_900459715.1_44626_D01
GCF_900459775.1	Y	MG_1	PRJNA224116	SAMEA3572413	F	na	Streptococcus pyogenes	Pyogenic	Streptococcus pyogenes	NCTC12841	Contig	2018/08/01	SC	ftp://ftp.ncbi.nlm.nih.gov/genomes/all/GCF/900/459/775/GCF_900459775.1_41851_C01
GCF_900459795.1	Y	MG_1	PRJNA224116	SAMEA53412418	F	na	Streptococcus pyogenes	Pyogenic	Streptococcus pyogenes	NCTC8229	Contig	2018/07/31	SC	ftp://ftp.ncbi.nlm.nih.gov/genomes/all/GCF/900/459/795/GCF_900459795.1_42969_D01
GCF_900459805.1	Y	MG_1	PRJNA224116	SAMEA53416168	F	na	Streptococcus pyogenes	Pyogenic	Streptococcus pyogenes	NCTC10875	Contig	2018/07/31	SC	ftp://ftp.ncbi.nlm.nih.gov/genomes/all/GCF/900/459/805/GCF_900459805.1_43024_C01
GCF_900459825.1	Y	MG_1	PRJNA224116	SAMEA3542445	F	na	Streptococcus pyogenes	Pyogenic	Streptococcus pyogenes	NCTC12051	Contig	2018/07/31	SC	ftp://ftp.ncbi.nlm.nih.gov/genomes/all/GCF/900/459/825/GCF_900459825.1_41800_C02
GCF_900459855.1	Y	MG_1	PRJNA224116	SAMEA53414668	F	na	Streptococcus pyogenes	Pyogenic	Streptococcus pyogenes	NCTC10870	Contig	2018/07/31	SC	ftp://ftp.ncbi.nlm.nih.gov/genomes/all/GCF/900/459/855/GCF_900459855.1_43024_A01
GCF_900459875.1	Y	MG_1	PRJNA224116	SAMEA3572433	F	na	Streptococcus pyogenes	Pyogenic	Streptococcus pyogenes	NCTC12049	Contig	2018/07/31	SC	ftp://ftp.ncbi.nlm.nih.gov/genomes/all/GCF/900/459/875/GCF_900459875.1_41885_F01
GCF_900459925.1	Y	MG_1	PRJNA224116	SAMEA3871792	F	na	Streptococcus pyogenes	Pyogenic	Streptococcus pyogenes	NCTC13740	Contig	2018/08/01	SC	ftp://ftp.ncbi.nlm.nih.gov/genomes/all/GCF/900/459/925/GCF_900459925.1_44503_H02
GCF_900460005.1	Y	MG_1	PRJNA224116	SAMEA3614268	F	na	Streptococcus pyogenes	Pyogenic	Streptococcus pyogenes	NCTC10866	Contig	2018/08/01	SC	ftp://ftp.ncbi.nlm.nih.gov/genomes/all/GCF/900/460/005/GCF_900460005.1_42197_G01
GCF_900460015.1	Y	MG_1	PRJNA224116	SAMEA3614269	F	na	Streptococcus pyogenes	Pyogenic	Streptococcus pyogenes	NCTC10872	Contig	2018/08/01	SC	ftp://ftp.ncbi.nlm.nih.gov/genomes/all/GCF/900/460/015/GCF_900460015.1_42057_E01
GCF_900460035.1	Y	MG_1	PRJNA224116	SAMEA3649028	F	na	Streptococcus pyogenes	Pyogenic	Streptococcus pyogenes	NCTC2366	Contig	2018/07/31	SC	ftp://ftp.ncbi.nlm.nih.gov/genomes/all/GCF/900/460/035/GCF_900460035.1_42650_G02
GCF_900460055.1	Y	MG_1	PRJNA224116	SAMEA3632057	F	na	Streptococcus pyogenes	Pyogenic	Streptococcus pyogenes	NCTC8303	Contig	2018/07/31	SC	ftp://ftp.ncbi.nlm.nih.gov/genomes/all/GCF/900/460/055/GCF_900460055.1_42206_B01
GCF_900460085.1	Y	MG_1	PRJNA224116	SAMEA3594348	F	na	Streptococcus pyogenes	Pyogenic	Streptococcus pyogenes	NCTC12061	Contig	2018/07/31	SC	ftp://ftp.ncbi.nlm.nih.gov/genomes/all/GCF/900/460/085/GCF_900460085.1_41906_E02
GCF_900461655.1	Y	MG_1	PRJNA224116	SAMEA53413918	F	na	Streptococcus pyogenes	Pyogenic	Streptococcus pyogenes	NCTC8330	Contig	2018/07/31	SC	ftp://ftp.ncbi.nlm.nih.gov/genomes/all/GCF/900/461/655/GCF_900461655.1_42969_F01
GCF_900474455.1	Y	MG_1	PRJNA224116	SAMEA3597579	F	na	Streptococcus pyogenes	Pyogenic	Streptococcus pyogenes	NCTC8225	Complete	2018/06/18	SC	ftp://ftp.ncbi.nlm.nih.gov/genomes/all/GCF/900/474/455/GCF_900474455.1_42017_D01
GCF_900474645.1	Y	MG_1	PRJNA224116	SAMEA3539724	F	na	Streptococcus pyogenes	Pyogenic	Streptococcus pyogenes	NCTC5163	Complete	2018/06/18	SC	ftp://ftp.ncbi.nlm.nih.gov/genomes/all/GCF/900/474/645/GCF_900474645.1_41767_A01
GCF_900474745.1	Y	MG_1	PRJNA224116	SAMEA3542447	F	na	Streptococcus pyogenes	Pyogenic	Streptococcus pyogenes	NCTC12059	Complete	2018/06/18	SC	ftp://ftp.ncbi.nlm.nih.gov/genomes/all/GCF/900/474/745/GCF_900474745.1_41800_E02
GCF_900474765.1	Y	MG_1	PRJNA224116	SAMEA3542441	F	na	Streptococcus pyogenes	Pyogenic	Streptococcus pyogenes	NCTC8314	Complete	2018/06/18	SC	ftp://ftp.ncbi.nlm.nih.gov/genomes/all/GCF/900/474/765/GCF_900474765.1_41800_G01
GCF_900474775.1	Y	MG_1	PRJNA224116	SAMEA3542449	F	na	Streptococcus pyogenes	Pyogenic	Streptococcus pyogenes	NCTC12066	Complete	2018/06/18	SC	ftp://ftp.ncbi.nlm.nih.gov/genomes/all/GCF/900/474/775/GCF_900474775.1_41800_G02
GCF_900474815.1	Y	MG_1	PRJNA224116	SAMEA3542440	F	na	Streptococcus pyogenes	Pyogenic	Streptococcus pyogenes	NCTC8300	Complete	2018/06/18	SC	ftp://ftp.ncbi.nlm.nih.gov/genomes/all/GCF/900/474/815/GCF_900474815.1_41800_F01
GCF_900474825.1	Y	MG_1	PRJNA224116	SAMEA3542444	F	na	Streptococcus pyogenes	Pyogenic	Streptococcus pyogenes	NCTC12045	Complete	2018/06/18	SC	ftp://ftp.ncbi.nlm.nih.gov/genomes/all/GCF/900/474/825/GCF_900474825.1_41800_B02
GCF_900474835.1	Y	MG_1	PRJNA224116	SAMEA3542450	F	na	Streptococcus pyogenes	Pyogenic	Streptococcus pyogenes	NCTC12069	Complete	2018/06/18	SC	ftp://ftp.ncbi.nlm.nih.gov/genomes/all/GCF/900/474/835/GCF_900474835.1_41800_H02
GCF_900474845.1	Y	MG_1	PRJNA224116	SAMEA3594346	F	na	Streptococcus pyogenes	Pyogenic	Streptococcus pyogenes	NCTC12057	Complete	2018/06/18	SC	ftp://ftp.ncbi.nlm.nih.gov/genomes/all/GCF/900/474/845/GCF_900474845.1_41906_C02
GCF_900474855.1	Y	MG_1	PRJNA224116	SAMEA3572419	F	na	Streptococcus pyogenes	Pyogenic	Streptococcus pyogenes	NCTC8328	Complete	2018/06/18	SC	ftp://ftp.ncbi.nlm.nih.gov/genomes/all/GCF/900/474/855/GCF_900474855.1_41825_E01
GCF_900474865.1	Y	MG_1	PRJNA224116	SAMEA3594347	F	na	Streptococcus pyogenes	Pyogenic	Streptococcus pyogenes	NCTC12058	Complete	2018/06/18	SC	ftp://ftp.ncbi.nlm.nih.gov/genomes/all/GCF/900/474/865/GCF_900474865.1_41906_D02
GCF_900474885.1	Y	MG_1	PRJNA224116	SAMEA3572427	F	na	Streptococcus pyogenes	Pyogenic	Streptococcus pyogenes	NCTC12046	Complete	2018/06/17	SC	ftp://ftp.ncbi.nlm.nih.gov/genomes/all/GCF/900/474/885/GCF_900474885.1_41851_E01
GCF_900474915.1	Y	MG_1	PRJNA224116	SAMEA3572431	F	na	Streptococcus pyogenes	Pyogenic	Streptococcus pyogenes	NCTC12048	Complete	2018/06/18	SC	ftp://ftp.ncbi.nlm.nih.gov/genomes/all/GCF/900/474/915/GCF_900474915.1_41851_G01
GCF_900474925.1	Y	MG_1	PRJNA224116	SAMEA3572435	F	na	Streptococcus pyogenes	Pyogenic	Streptococcus pyogenes	NCTC12050	Complete	2018/06/18	SC	ftp://ftp.ncbi.nlm.nih.gov/genomes/all/GCF/900/474/925/GCF_900474925.1_41885_G01
GCF_900474935.1	Y	MG_1	PRJNA224116	SAMEA3572429	F	na	Streptococcus pyogenes	Pyogenic	Streptococcus pyogenes	NCTC12047	Complete	2018/06/17	SC	ftp://ftp.ncbi.nlm.nih.gov/genomes/all/GCF/900/474/935/GCF_900474935.1_41851_F01
GCF_900474945.1	Y	MG_1	PRJNA224116	SAMEA3597580	F	na	Streptococcus pyogenes	Pyogenic	Streptococcus pyogenes	NCTC8316	Complete	2018/06/18	SC	ftp://ftp.ncbi.nlm.nih.gov/genomes/all/GCF/900/474/945/GCF_900474945.1_42017_E01
GCF_900474975.1	Y	MG_1	PRJNA224116	SAMEA3594345	F	na	Streptococcus pyogenes	Pyogenic	Streptococcus pyogenes	NCTC12052	Complete	2018/06/17	SC	ftp://ftp.ncbi.nlm.nih.gov/genomes/all/GCF/900/474/975/GCF_900474975.1_41906_B02
GCF_900475085.1	Y	MG_1	PRJNA224116	SAMEA3632058	F	na	Streptococcus pyogenes	Pyogenic	Streptococcus pyogenes	NCTC8324	Complete	2018/06/17	SC	ftp://ftp.ncbi.nlm.nih.gov/genomes/all/GCF/900/475/085/GCF_900475085.1_42206_C01
GCF_900475155.1	Y	MG_1	PRJNA224116	SAMEA3594352	F	na	Streptococcus pyogenes	Pyogenic	Streptococcus pyogenes	NCTC12068	Complete	2018/06/17	SC	ftp://ftp.ncbi.nlm.nih.gov/genomes/all/GCF/900/475/155/GCF_900475155.1_41975_A01
GCF_900475165.1	Y	MG_1	PRJNA224116	SAMEA3649042	F	na	Streptococcus pyogenes	Pyogenic	Streptococcus pyogenes	NCTC8230	Complete	2018/06/17	SC	ftp://ftp.ncbi.nlm.nih.gov/genomes/all/GCF/900/475/165/GCF_900475165.1_42731_D01
GCF_900475175.1	Y	MG_1	PRJNA224116	SAMEA3662939	F	na	Streptococcus pyogenes	Pyogenic	Streptococcus pyogenes	NCTC10876	Complete	2018/06/17	SC	ftp://ftp.ncbi.nlm.nih.gov/genomes/all/GCF/900/475/175/GCF_900475175.1_42912_A02
GCF_900475335.1	Y	MG_1	PRJNA224116	SAMEA3662934	F	na	Streptococcus pyogenes	Pyogenic	Streptococcus pyogenes	NCTC8322	Complete	2018/06/18	SC	ftp://ftp.ncbi.nlm.nih.gov/genomes/all/GCF/900/475/335/GCF_900475335.1_42912_D01
GCF_900475425.1	Y	MG_1	PRJNA224116	SAMEA3729940	F	na	Streptococcus pyogenes	Pyogenic	Streptococcus pyogenes	NCTC10874	Complete	2018/06/17	SC	ftp://ftp.ncbi.nlm.nih.gov/genomes/all/GCF/900/475/425/GCF_900475425.1_43908_F01
GCF_900475455.1	Y	MG_1	PRJNA224116	SAMEA3871783	F	na	Streptococcus pyogenes	Pyogenic	Streptococcus pyogenes	NCTC10879	Complete	2018/06/17	SC	ftp://ftp.ncbi.nlm.nih.gov/genomes/all/GCF/900/475/455/GCF_900475455.1_44451_G01
GCF_900475465.1	Y	MG_1	PRJNA224116	SAMEA53411668	F	na	Streptococcus pyogenes	Pyogenic	Streptococcus pyogenes	NCTC8224	Complete	2018/06/18	SC	ftp://ftp.ncbi.nlm.nih.gov/genomes/all/GCF/900/475/465/GCF_900475465.1_42969_C01
GCF_900475475.1	Y	MG_1	PRJNA224116	SAMEA3871791	F	na	Streptococcus pyogenes	Pyogenic	Streptococcus pyogenes	NCTC13738	Complete	2018/06/17	SC	ftp://ftp.ncbi.nlm.nih.gov/genomes/all/GCF/900/475/475/GCF_900475475.1_44503_G02
GCF_900475525.1	Y	MG_1	PRJNA224116	SAMEA3879489	F	na	Streptococcus pyogenes	Pyogenic	Streptococcus pyogenes	NCTC13743	Complete	2018/06/17	SC	ftp://ftp.ncbi.nlm.nih.gov/genomes/all/GCF/900/475/525/GCF_900475525.1_44738_D02
GCF_900475565.1	Y	MG_1	PRJNA224116	SAMEA3662931	F	na	Streptococcus pyogenes	Pyogenic	Streptococcus pyogenes	NCTC10880	Complete	2018/06/17	SC	ftp://ftp.ncbi.nlm.nih.gov/genomes/all/GCF/900/475/565/GCF_900475565.1_42912_A01
GCF_900475615.1	Y	MG_1	PRJNA224116	SAMEA3871782	F	na	Streptococcus pyogenes	Pyogenic	Streptococcus pyogenes	NCTC8227	Complete	2018/06/17	SC	ftp://ftp.ncbi.nlm.nih.gov/genomes/all/GCF/900/475/615/GCF_900475615.1_44451_E01
GCF_900475705.1	Y	MG_1	PRJNA224116	SAMEA3879490	F	na	Streptococcus pyogenes	Pyogenic	Streptococcus pyogenes	NCTC13744	Complete	2018/06/17	SC	ftp://ftp.ncbi.nlm.nih.gov/genomes/all/GCF/900/475/705/GCF_900475705.1_44858_B01
GCF_900475765.1	Y	MG_1	PRJNA224116	SAMEA4012328	F	na	Streptococcus pyogenes	Pyogenic	Streptococcus pyogenes	NCTC13736	Complete	2018/06/17	SC	ftp://ftp.ncbi.nlm.nih.gov/genomes/all/GCF/900/475/765/GCF_900475765.1_46931_G01
GCF_900475795.1	Y	MG_1	PRJNA224116	SAMEA4557824	F	na	Streptococcus pyogenes	Pyogenic	Streptococcus pyogenes	NCTC8304	Complete	2018/06/17	SC	ftp://ftp.ncbi.nlm.nih.gov/genomes/all/GCF/900/475/795/GCF_900475795.1_46514_A02
GCF_900475865.1	Y	MG_1	PRJNA224116	SAMEA53434918	F	na	Streptococcus pyogenes	Pyogenic	Streptococcus pyogenes	NCTC13739	Complete	2018/06/17	SC	ftp://ftp.ncbi.nlm.nih.gov/genomes/all/GCF/900/475/865/GCF_900475865.1_46338_A02
GCF_900475875.1	Y	MG_1	PRJNA224116	SAMEA4017720	F	na	Streptococcus pyogenes	Pyogenic	Streptococcus pyogenes	NCTC13737	Complete	2018/06/17	SC	ftp://ftp.ncbi.nlm.nih.gov/genomes/all/GCF/900/475/875/GCF_900475875.1_47297_B01
GCF_900475925.1	Y	MG_1	PRJNA224116	SAMEA3956097	F	na	Streptococcus pyogenes	Pyogenic	Streptococcus pyogenes	NCTC12044	Complete	2018/06/17	SC	ftp://ftp.ncbi.nlm.nih.gov/genomes/all/GCF/900/475/925/GCF_900475925.1_46514_A01
GCF_900619615.1	Y	MG_1	PRJNA224116	SAMEA5096236	F	na	Streptococcus pyogenes	Pyogenic	Streptococcus pyogenes	PS003	Complete	2019/01/10	Bioplatforms Australia	ftp://ftp.ncbi.nlm.nih.gov/genomes/all/GCF/900/619/615/GCF_900619615.1_PS003
GCF_900636425.1	Y	MG_1	PRJNA224116	SAMEA3542448	F	na	Streptococcus pyogenes	Pyogenic	Streptococcus pyogenes	NCTC12060	Complete	2018/12/20	SC	ftp://ftp.ncbi.nlm.nih.gov/genomes/all/GCF/900/636/425/GCF_900636425.1_41800_F02
GCF_900636485.1	Y	MG_1	PRJNA224116	SAMEA3632070	F	na	Streptococcus pyogenes	Pyogenic	Streptococcus pyogenes	NCTC8232	Complete	2018/12/20	SC	ftp://ftp.ncbi.nlm.nih.gov/genomes/all/GCF/900/636/485/GCF_900636485.1_42290_G02
GCF_900982675.1	Y	MG_1	PRJNA224116	SAMEA2238130	F	na	Streptococcus pyogenes	Pyogenic	Streptococcus pyogenes	K3534	Scaffold	2019/04/11	SC	ftp://ftp.ncbi.nlm.nih.gov/genomes/all/GCF/900/982/675/GCF_900982675.1_11791_7_71
GCF_900982705.1	Y	MG_1	PRJNA224116	SAMEA2238137	F	na	Streptococcus pyogenes	Pyogenic	Streptococcus pyogenes	K6239	Scaffold	2019/04/11	SC	ftp://ftp.ncbi.nlm.nih.gov/genomes/all/GCF/900/982/705/GCF_900982705.1_11791_7_77
GCF_900982735.1	Y	MG_1	PRJNA224116	SAMEA2238133	F	na	Streptococcus pyogenes	Pyogenic	Streptococcus pyogenes	K5721	Contig	2019/04/11	SC	ftp://ftp.ncbi.nlm.nih.gov/genomes/all/GCF/900/982/735/GCF_900982735.1_11791_7_74
GCF_900982745.1	Y	MG_1	PRJNA224116	SAMEA2238134	F	na	Streptococcus pyogenes	Pyogenic	Streptococcus pyogenes	K5911	Scaffold	2019/04/11	SC	ftp://ftp.ncbi.nlm.nih.gov/genomes/all/GCF/900/982/745/GCF_900982745.1_11791_7_75
GCF_900982765.1	Y	MG_1	PRJNA224116	SAMEA2238149	F	na	Streptococcus pyogenes	Pyogenic	Streptococcus pyogenes	K9340	Scaffold	2019/04/11	SC	ftp://ftp.ncbi.nlm.nih.gov/genomes/all/GCF/900/982/765/GCF_900982765.1_11791_7_81
GCF_900982785.1	Y	MG_1	PRJNA224116	SAMEA2238138	F	na	Streptococcus pyogenes	Pyogenic	Streptococcus pyogenes	K6429	Contig	2019/04/11	SC	ftp://ftp.ncbi.nlm.nih.gov/genomes/all/GCF/900/982/785/GCF_900982785.1_11791_7_78
GCF_900982795.1	Y	MG_1	PRJNA224116	SAMEA2238152	F	na	Streptococcus pyogenes	Pyogenic	Streptococcus pyogenes	K9404	Contig	2019/04/11	SC	ftp://ftp.ncbi.nlm.nih.gov/genomes/all/GCF/900/982/795/GCF_900982795.1_11791_7_82
GCF_900982805.1	Y	MG_1	PRJNA224116	SAMEA2238154	F	na	Streptococcus pyogenes	Pyogenic	Streptococcus pyogenes	K9466	Scaffold	2019/04/11	SC	ftp://ftp.ncbi.nlm.nih.gov/genomes/all/GCF/900/982/805/GCF_900982805.1_11791_7_84
GCF_900982825.1	Y	MG_1	PRJNA224116	SAMEA2238141	F	na	Streptococcus pyogenes	Pyogenic	Streptococcus pyogenes	K6821	Scaffold	2019/04/11	SC	ftp://ftp.ncbi.nlm.nih.gov/genomes/all/GCF/900/982/825/GCF_900982825.1_11791_7_79
GCF_900982845.1	Y	MG_1	PRJNA224116	SAMEA2238163	F	na	Streptococcus pyogenes	Pyogenic	Streptococcus pyogenes	K13569	Contig	2019/04/11	SC	ftp://ftp.ncbi.nlm.nih.gov/genomes/all/GCF/900/982/845/GCF_900982845.1_11791_7_87
GCF_900982865.1	Y	MG_1	PRJNA224116	SAMEA2238164	F	na	Streptococcus pyogenes	Pyogenic	Streptococcus pyogenes	K16587	Scaffold	2019/04/11	SC	ftp://ftp.ncbi.nlm.nih.gov/genomes/all/GCF/900/982/865/GCF_900982865.1_11791_7_88
GCF_900982875.1	Y	MG_1	PRJNA224116	SAMEA2238165	F	na	Streptococcus pyogenes	Pyogenic	Streptococcus pyogenes	K16849	Scaffold	2019/04/11	SC	ftp://ftp.ncbi.nlm.nih.gov/genomes/all/GCF/900/982/875/GCF_900982875.1_11791_7_89
GCF_900982885.1	Y	MG_1	PRJNA224116	SAMEA2238169	F	na	Streptococcus pyogenes	Pyogenic	Streptococcus pyogenes	K19464	Scaffold	2019/04/11	SC	ftp://ftp.ncbi.nlm.nih.gov/genomes/all/GCF/900/982/885/GCF_900982885.1_11791_7_90
GCF_900982905.1	Y	MG_1	PRJNA224116	SAMEA2238177	F	na	Streptococcus pyogenes	Pyogenic	Streptococcus pyogenes	K39244	Scaffold	2019/04/11	SC	ftp://ftp.ncbi.nlm.nih.gov/genomes/all/GCF/900/982/905/GCF_900982905.1_11791_7_93
GCF_900982915.1	Y	MG_1	PRJNA224116	SAMEA2238173	F	na	Streptococcus pyogenes	Pyogenic	Streptococcus pyogenes	K24357	Contig	2019/04/11	SC	ftp://ftp.ncbi.nlm.nih.gov/genomes/all/GCF/900/982/915/GCF_900982915.1_11791_7_91
GCF_900982925.1	Y	MG_1	PRJNA224116	SAMEA2238166	F	na	Streptococcus pyogenes	Pyogenic	Streptococcus pyogenes	K17011	Scaffold	2019/04/11	SC	ftp://ftp.ncbi.nlm.nih.gov/genomes/all/GCF/900/982/925/GCF_900982925.1_11822_8_19
GCF_900982935.1	Y	MG_1	PRJNA224116	SAMEA2238158	F	na	Streptococcus pyogenes	Pyogenic	Streptococcus pyogenes	K10246	Scaffold	2019/04/11	SC	ftp://ftp.ncbi.nlm.nih.gov/genomes/all/GCF/900/982/935/GCF_900982935.1_11822_8_16
GCF_900982955.1	Y	MG_1	PRJNA224116	SAMEA2238180	F	na	Streptococcus pyogenes	Pyogenic	Streptococcus pyogenes	K47483	Contig	2019/04/11	SC	ftp://ftp.ncbi.nlm.nih.gov/genomes/all/GCF/900/982/955/GCF_900982955.1_11791_7_94
GCF_900982975.1	Y	MG_1	PRJNA224116	SAMEA2238156	F	na	Streptococcus pyogenes	Pyogenic	Streptococcus pyogenes	K9927	Scaffold	2019/04/11	SC	ftp://ftp.ncbi.nlm.nih.gov/genomes/all/GCF/900/982/975/GCF_900982975.1_11822_8_14
GCF_900982995.1	Y	MG_1	PRJNA224116	SAMEA2238155	F	na	Streptococcus pyogenes	Pyogenic	Streptococcus pyogenes	K9887	Scaffold	2019/04/11	SC	ftp://ftp.ncbi.nlm.nih.gov/genomes/all/GCF/900/982/995/GCF_900982995.1_11822_8_13
GCF_900983025.1	Y	MG_1	PRJNA224116	SAMEA2238161	F	na	Streptococcus pyogenes	Pyogenic	Streptococcus pyogenes	K12537	Scaffold	2019/04/11	SC	ftp://ftp.ncbi.nlm.nih.gov/genomes/all/GCF/900/983/025/GCF_900983025.1_11822_8_17
GCF_900983035.1	Y	MG_1	PRJNA224116	SAMEA2238171	F	na	Streptococcus pyogenes	Pyogenic	Streptococcus pyogenes	K21771	Scaffold	2019/04/11	SC	ftp://ftp.ncbi.nlm.nih.gov/genomes/all/GCF/900/983/035/GCF_900983035.1_11822_8_23
GCF_900983045.1	Y	MG_1	PRJNA224116	SAMEA2238168	F	na	Streptococcus pyogenes	Pyogenic	Streptococcus pyogenes	K19188	Scaffold	2019/04/11	SC	ftp://ftp.ncbi.nlm.nih.gov/genomes/all/GCF/900/983/045/GCF_900983045.1_11822_8_21
GCF_900983065.1	Y	MG_1	PRJNA224116	SAMEA2238175	F	na	Streptococcus pyogenes	Pyogenic	Streptococcus pyogenes	K36563	Contig	2019/04/11	SC	ftp://ftp.ncbi.nlm.nih.gov/genomes/all/GCF/900/983/065/GCF_900983065.1_11822_8_25
GCF_900983075.1	Y	MG_1	PRJNA224116	SAMEA2238176	F	na	Streptococcus pyogenes	Pyogenic	Streptococcus pyogenes	K38470	Contig	2019/04/11	SC	ftp://ftp.ncbi.nlm.nih.gov/genomes/all/GCF/900/983/075/GCF_900983075.1_11822_8_26
GCF_900983165.1	Y	MG_1	PRJNA224116	SAMEA2238003	F	na	Streptococcus pyogenes	Pyogenic	Streptococcus pyogenes	NS2413	Scaffold	2019/04/11	SC	ftp://ftp.ncbi.nlm.nih.gov/genomes/all/GCF/900/983/165/GCF_900983165.1_11826_4_61
GCF_900983175.1	Y	MG_1	PRJNA224116	SAMEA2238002	F	na	Streptococcus pyogenes	Pyogenic	Streptococcus pyogenes	NS2403	Contig	2019/04/11	SC	ftp://ftp.ncbi.nlm.nih.gov/genomes/all/GCF/900/983/175/GCF_900983175.1_11826_4_60
GCF_900983195.1	Y	MG_1	PRJNA224116	SAMEA2238146	F	na	Streptococcus pyogenes	Pyogenic	Streptococcus pyogenes	K7478	Contig	2019/04/11	SC	ftp://ftp.ncbi.nlm.nih.gov/genomes/all/GCF/900/983/195/GCF_900983195.1_11822_8_7
GCF_900983205.1	Y	MG_1	PRJNA224116	SAMEA2238147	F	na	Streptococcus pyogenes	Pyogenic	Streptococcus pyogenes	K7928	Scaffold	2019/04/11	SC	ftp://ftp.ncbi.nlm.nih.gov/genomes/all/GCF/900/983/205/GCF_900983205.1_11822_8_9
GCF_900983225.1	Y	MG_1	PRJNA224116	SAMEA2238014	F	na	Streptococcus pyogenes	Pyogenic	Streptococcus pyogenes	NS426	Scaffold	2019/04/11	SC	ftp://ftp.ncbi.nlm.nih.gov/genomes/all/GCF/900/983/225/GCF_900983225.1_11826_4_72
GCF_900983245.1	Y	MG_1	PRJNA224116	SAMEA2238008	F	na	Streptococcus pyogenes	Pyogenic	Streptococcus pyogenes	NS2188	Scaffold	2019/04/11	SC	ftp://ftp.ncbi.nlm.nih.gov/genomes/all/GCF/900/983/245/GCF_900983245.1_11826_4_66
GCF_900983255.1	Y	MG_1	PRJNA224116	SAMEA2238009	F	na	Streptococcus pyogenes	Pyogenic	Streptococcus pyogenes	GAS253	Scaffold	2019/04/11	SC	ftp://ftp.ncbi.nlm.nih.gov/genomes/all/GCF/900/983/255/GCF_900983255.1_11826_4_67
GCF_900983275.1	Y	MG_1	PRJNA224116	SAMEA2238016	F	na	Streptococcus pyogenes	Pyogenic	Streptococcus pyogenes	NS6902	Scaffold	2019/04/11	SC	ftp://ftp.ncbi.nlm.nih.gov/genomes/all/GCF/900/983/275/GCF_900983275.1_11826_4_74
GCF_900983285.1	Y	MG_1	PRJNA224116	SAMEA2238017	F	na	Streptococcus pyogenes	Pyogenic	Streptococcus pyogenes	NS3965	Scaffold	2019/04/11	SC	ftp://ftp.ncbi.nlm.nih.gov/genomes/all/GCF/900/983/285/GCF_900983285.1_11826_4_75
GCF_900983435.1	Y	MG_1	PRJNA224116	SAMEA2238034	F	na	Streptococcus pyogenes	Pyogenic	Streptococcus pyogenes	YARG4	Scaffold	2019/04/11	SC	ftp://ftp.ncbi.nlm.nih.gov/genomes/all/GCF/900/983/435/GCF_900983435.1_11826_4_92
GCF_900983455.1	Y	MG_1	PRJNA224116	SAMEA3919135	F	na	Streptococcus pyogenes	Pyogenic	Streptococcus pyogenes	A1267	Scaffold	2019/04/11	SC	ftp://ftp.ncbi.nlm.nih.gov/genomes/all/GCF/900/983/455/GCF_900983455.1_19944_6_139
GCF_900983475.1	Y	MG_1	PRJNA224116	SAMEA3919134	F	na	Streptococcus pyogenes	Pyogenic	Streptococcus pyogenes	A1152	Contig	2019/04/11	SC	ftp://ftp.ncbi.nlm.nih.gov/genomes/all/GCF/900/983/475/GCF_900983475.1_19944_6_140
GCF_900983485.1	Y	MG_1	PRJNA224116	SAMEA3919133	F	na	Streptococcus pyogenes	Pyogenic	Streptococcus pyogenes	A1151	Contig	2019/04/11	SC	ftp://ftp.ncbi.nlm.nih.gov/genomes/all/GCF/900/983/485/GCF_900983485.1_19944_6_141
GCF_900983525.1	Y	MG_1	PRJNA224116	SAMEA3919128	F	na	Streptococcus pyogenes	Pyogenic	Streptococcus pyogenes	A997	Scaffold	2019/04/11	SC	ftp://ftp.ncbi.nlm.nih.gov/genomes/all/GCF/900/983/525/GCF_900983525.1_19944_6_146
GCF_900983555.1	Y	MG_1	PRJNA224116	SAMEA3919125	F	na	Streptococcus pyogenes	Pyogenic	Streptococcus pyogenes	A993	Scaffold	2019/04/11	SC	ftp://ftp.ncbi.nlm.nih.gov/genomes/all/GCF/900/983/555/GCF_900983555.1_19944_6_149
GCF_900983585.1	Y	MG_1	PRJNA224116	SAMEA3919123	F	na	Streptococcus pyogenes	Pyogenic	Streptococcus pyogenes	A981	Contig	2019/04/11	SC	ftp://ftp.ncbi.nlm.nih.gov/genomes/all/GCF/900/983/585/GCF_900983585.1_19944_6_151
GCF_900983605.1	Y	MG_1	PRJNA224116	SAMEA3919124	F	na	Streptococcus pyogenes	Pyogenic	Streptococcus pyogenes	A982	Contig	2019/04/11	SC	ftp://ftp.ncbi.nlm.nih.gov/genomes/all/GCF/900/983/605/GCF_900983605.1_19944_6_150
GCF_900983625.1	Y	MG_1	PRJNA224116	SAMEA3919119	F	na	Streptococcus pyogenes	Pyogenic	Streptococcus pyogenes	A960	Contig	2019/04/11	SC	ftp://ftp.ncbi.nlm.nih.gov/genomes/all/GCF/900/983/625/GCF_900983625.1_19944_6_155
GCF_900983635.1	Y	MG_1	PRJNA224116	SAMEA3919117	F	na	Streptococcus pyogenes	Pyogenic	Streptococcus pyogenes	A920	Scaffold	2019/04/11	SC	ftp://ftp.ncbi.nlm.nih.gov/genomes/all/GCF/900/983/635/GCF_900983635.1_19944_6_157
GCF_900983655.1	Y	MG_1	PRJNA224116	SAMEA3919116	F	na	Streptococcus pyogenes	Pyogenic	Streptococcus pyogenes	A915	Contig	2019/04/11	SC	ftp://ftp.ncbi.nlm.nih.gov/genomes/all/GCF/900/983/655/GCF_900983655.1_19944_6_158
GCF_900983685.1	Y	MG_1	PRJNA224116	SAMEA3919111	F	na	Streptococcus pyogenes	Pyogenic	Streptococcus pyogenes	A900	Scaffold	2019/04/11	SC	ftp://ftp.ncbi.nlm.nih.gov/genomes/all/GCF/900/983/685/GCF_900983685.1_19944_6_163
GCF_900983695.1	Y	MG_1	PRJNA224116	SAMEA3919112	F	na	Streptococcus pyogenes	Pyogenic	Streptococcus pyogenes	A904	Scaffold	2019/04/11	SC	ftp://ftp.ncbi.nlm.nih.gov/genomes/all/GCF/900/983/695/GCF_900983695.1_19944_6_162
GCF_900983705.1	Y	MG_1	PRJNA224116	SAMEA3919110	F	na	Streptococcus pyogenes	Pyogenic	Streptococcus pyogenes	A896	Contig	2019/04/11	SC	ftp://ftp.ncbi.nlm.nih.gov/genomes/all/GCF/900/983/705/GCF_900983705.1_19944_6_164
GCF_900983785.1	Y	MG_1	PRJNA224116	SAMEA3919102	F	na	Streptococcus pyogenes	Pyogenic	Streptococcus pyogenes	A855	Contig	2019/04/11	SC	ftp://ftp.ncbi.nlm.nih.gov/genomes/all/GCF/900/983/785/GCF_900983785.1_19944_6_172
GCF_900983815.1	Y	MG_1	PRJNA224116	SAMEA3919101	F	na	Streptococcus pyogenes	Pyogenic	Streptococcus pyogenes	A848	Scaffold	2019/04/11	SC	ftp://ftp.ncbi.nlm.nih.gov/genomes/all/GCF/900/983/815/GCF_900983815.1_19944_6_173
GCF_900983925.1	Y	MG_1	PRJNA224116	SAMEA3918988	F	na	Streptococcus pyogenes	Pyogenic	Streptococcus pyogenes	15GA0011	Contig	2019/04/11	SC	ftp://ftp.ncbi.nlm.nih.gov/genomes/all/GCF/900/983/925/GCF_900983925.1_19944_7_109
GCF_900983935.1	Y	MG_1	PRJNA224116	SAMEA3918985	F	na	Streptococcus pyogenes	Pyogenic	Streptococcus pyogenes	GAS14211	Contig	2019/04/11	SC	ftp://ftp.ncbi.nlm.nih.gov/genomes/all/GCF/900/983/935/GCF_900983935.1_19944_7_112
GCF_900983945.1	Y	MG_1	PRJNA224116	SAMEA3919088	F	na	Streptococcus pyogenes	Pyogenic	Streptococcus pyogenes	Bra005	Scaffold	2019/04/11	SC	ftp://ftp.ncbi.nlm.nih.gov/genomes/all/GCF/900/983/945/GCF_900983945.1_19944_7_11
GCF_900984025.1	Y	MG_1	PRJNA224116	SAMEA3919087	F	na	Streptococcus pyogenes	Pyogenic	Streptococcus pyogenes	Bra040	Contig	2019/04/11	SC	ftp://ftp.ncbi.nlm.nih.gov/genomes/all/GCF/900/984/025/GCF_900984025.1_19944_7_12
GCF_900984075.1	Y	MG_1	PRJNA224116	SAMEA3918974	F	na	Streptococcus pyogenes	Pyogenic	Streptococcus pyogenes	GAS131142	Contig	2019/04/11	SC	ftp://ftp.ncbi.nlm.nih.gov/genomes/all/GCF/900/984/075/GCF_900984075.1_19944_7_123
GCF_900984205.1	Y	MG_1	PRJNA224116	SAMEA3918962	F	na	Streptococcus pyogenes	Pyogenic	Streptococcus pyogenes	14GA0305	Scaffold	2019/04/11	SC	ftp://ftp.ncbi.nlm.nih.gov/genomes/all/GCF/900/984/205/GCF_900984205.1_19944_7_135
GCF_900984215.1	Y	MG_1	PRJNA224116	SAMEA3918961	F	na	Streptococcus pyogenes	Pyogenic	Streptococcus pyogenes	14GA1101	Contig	2019/04/11	SC	ftp://ftp.ncbi.nlm.nih.gov/genomes/all/GCF/900/984/215/GCF_900984215.1_19944_7_136
GCF_900984245.1	Y	MG_1	PRJNA224116	SAMEA3918957	F	na	Streptococcus pyogenes	Pyogenic	Streptococcus pyogenes	GAS13474	Contig	2019/04/11	SC	ftp://ftp.ncbi.nlm.nih.gov/genomes/all/GCF/900/984/245/GCF_900984245.1_19944_7_140
GCF_900984275.1	Y	MG_1	PRJNA224116	SAMEA3918953	F	na	Streptococcus pyogenes	Pyogenic	Streptococcus pyogenes	GAS1464	Contig	2019/04/11	SC	ftp://ftp.ncbi.nlm.nih.gov/genomes/all/GCF/900/984/275/GCF_900984275.1_19944_7_144
GCF_900984315.1	Y	MG_1	PRJNA224116	SAMEA3918950	F	na	Streptococcus pyogenes	Pyogenic	Streptococcus pyogenes	GAS131111	Scaffold	2019/04/11	SC	ftp://ftp.ncbi.nlm.nih.gov/genomes/all/GCF/900/984/315/GCF_900984315.1_19944_7_147
GCF_900984345.1	Y	MG_1	PRJNA224116	SAMEA3919084	F	na	Streptococcus pyogenes	Pyogenic	Streptococcus pyogenes	Bra004	Contig	2019/04/11	SC	ftp://ftp.ncbi.nlm.nih.gov/genomes/all/GCF/900/984/345/GCF_900984345.1_19944_7_15
GCF_900984375.1	Y	MG_1	PRJNA224116	SAMEA3918945	F	na	Streptococcus pyogenes	Pyogenic	Streptococcus pyogenes	14GA1044	Scaffold	2019/04/11	SC	ftp://ftp.ncbi.nlm.nih.gov/genomes/all/GCF/900/984/375/GCF_900984375.1_19944_7_152
GCF_900984645.1	Y	MG_1	PRJNA224116	SAMEA3918920	F	na	Streptococcus pyogenes	Pyogenic	Streptococcus pyogenes	GAS12107	Contig	2019/04/11	SC	ftp://ftp.ncbi.nlm.nih.gov/genomes/all/GCF/900/984/645/GCF_900984645.1_19944_7_177
GCF_900984675.1	Y	MG_1	PRJNA224116	SAMEA3919079	F	na	Streptococcus pyogenes	Pyogenic	Streptococcus pyogenes	Bra003	Scaffold	2019/04/11	SC	ftp://ftp.ncbi.nlm.nih.gov/genomes/all/GCF/900/984/675/GCF_900984675.1_19944_7_20
GCF_900984695.1	Y	MG_1	PRJNA224116	SAMEA3919076	F	na	Streptococcus pyogenes	Pyogenic	Streptococcus pyogenes	Bra026	Contig	2019/04/11	SC	ftp://ftp.ncbi.nlm.nih.gov/genomes/all/GCF/900/984/695/GCF_900984695.1_19944_7_23
GCF_900984705.1	Y	MG_1	PRJNA224116	SAMEA3919097	F	na	Streptococcus pyogenes	Pyogenic	Streptococcus pyogenes	A841	Contig	2019/04/11	SC	ftp://ftp.ncbi.nlm.nih.gov/genomes/all/GCF/900/984/705/GCF_900984705.1_19944_7_2
GCF_900984715.1	Y	MG_1	PRJNA224116	SAMEA3919077	F	na	Streptococcus pyogenes	Pyogenic	Streptococcus pyogenes	Bra038	Contig	2019/04/11	SC	ftp://ftp.ncbi.nlm.nih.gov/genomes/all/GCF/900/984/715/GCF_900984715.1_19944_7_22
GCF_900984745.1	Y	MG_1	PRJNA224116	SAMEA3919072	F	na	Streptococcus pyogenes	Pyogenic	Streptococcus pyogenes	Bra037	Contig	2019/04/11	SC	ftp://ftp.ncbi.nlm.nih.gov/genomes/all/GCF/900/984/745/GCF_900984745.1_19944_7_27
GCF_900984785.1	Y	MG_1	PRJNA224116	SAMEA3919071	F	na	Streptococcus pyogenes	Pyogenic	Streptococcus pyogenes	Bra025	Scaffold	2019/04/11	SC	ftp://ftp.ncbi.nlm.nih.gov/genomes/all/GCF/900/984/785/GCF_900984785.1_19944_7_28
GCF_900984805.1	Y	MG_1	PRJNA224116	SAMEA3919073	F	na	Streptococcus pyogenes	Pyogenic	Streptococcus pyogenes	Bra049	Scaffold	2019/04/11	SC	ftp://ftp.ncbi.nlm.nih.gov/genomes/all/GCF/900/984/805/GCF_900984805.1_19944_7_26
GCF_900984815.1	Y	MG_1	PRJNA224116	SAMEA3919067	F	na	Streptococcus pyogenes	Pyogenic	Streptococcus pyogenes	Bra036	Contig	2019/04/11	SC	ftp://ftp.ncbi.nlm.nih.gov/genomes/all/GCF/900/984/815/GCF_900984815.1_19944_7_32
GCF_900984835.1	Y	MG_1	PRJNA224116	SAMEA3919065	F	na	Streptococcus pyogenes	Pyogenic	Streptococcus pyogenes	Bra012	Contig	2019/04/11	SC	ftp://ftp.ncbi.nlm.nih.gov/genomes/all/GCF/900/984/835/GCF_900984835.1_19944_7_34
GCF_900984845.1	Y	MG_1	PRJNA224116	SAMEA3919064	F	na	Streptococcus pyogenes	Pyogenic	Streptococcus pyogenes	Bel007	Contig	2019/04/11	SC	ftp://ftp.ncbi.nlm.nih.gov/genomes/all/GCF/900/984/845/GCF_900984845.1_19944_7_35
GCF_900984865.1	Y	MG_1	PRJNA224116	SAMEA3919061	F	na	Streptococcus pyogenes	Pyogenic	Streptococcus pyogenes	Bra023	Contig	2019/04/11	SC	ftp://ftp.ncbi.nlm.nih.gov/genomes/all/GCF/900/984/865/GCF_900984865.1_19944_7_38
GCF_900984875.1	Y	MG_1	PRJNA224116	SAMEA3919062	F	na	Streptococcus pyogenes	Pyogenic	Streptococcus pyogenes	Bra035	Contig	2019/04/11	SC	ftp://ftp.ncbi.nlm.nih.gov/genomes/all/GCF/900/984/875/GCF_900984875.1_19944_7_37
GCF_900984895.1	Y	MG_1	PRJNA224116	SAMEA3919095	F	na	Streptococcus pyogenes	Pyogenic	Streptococcus pyogenes	A839	Contig	2019/04/11	SC	ftp://ftp.ncbi.nlm.nih.gov/genomes/all/GCF/900/984/895/GCF_900984895.1_19944_7_4
GCF_900984905.1	Y	MG_1	PRJNA224116	SAMEA3919058	F	na	Streptococcus pyogenes	Pyogenic	Streptococcus pyogenes	Bra046	Scaffold	2019/04/11	SC	ftp://ftp.ncbi.nlm.nih.gov/genomes/all/GCF/900/984/905/GCF_900984905.1_19944_7_41
GCF_900984915.1	Y	MG_1	PRJNA224116	SAMEA3919059	F	na	Streptococcus pyogenes	Pyogenic	Streptococcus pyogenes	Bel006	Contig	2019/04/11	SC	ftp://ftp.ncbi.nlm.nih.gov/genomes/all/GCF/900/984/915/GCF_900984915.1_19944_7_40
GCF_900984925.1	Y	MG_1	PRJNA224116	SAMEA3919057	F	na	Streptococcus pyogenes	Pyogenic	Streptococcus pyogenes	Bra034	Contig	2019/04/11	SC	ftp://ftp.ncbi.nlm.nih.gov/genomes/all/GCF/900/984/925/GCF_900984925.1_19944_7_42
GCF_900984935.1	Y	MG_1	PRJNA224116	SAMEA3919054	F	na	Streptococcus pyogenes	Pyogenic	Streptococcus pyogenes	Bel005	Scaffold	2019/04/11	SC	ftp://ftp.ncbi.nlm.nih.gov/genomes/all/GCF/900/984/935/GCF_900984935.1_19944_7_45
GCF_900984975.1	Y	MG_1	PRJNA224116	SAMEA3919055	F	na	Streptococcus pyogenes	Pyogenic	Streptococcus pyogenes	Bra010	Contig	2019/04/11	SC	ftp://ftp.ncbi.nlm.nih.gov/genomes/all/GCF/900/984/975/GCF_900984975.1_19944_7_44
GCF_900985015.1	Y	MG_1	PRJNA224116	SAMEA3919047	F	na	Streptococcus pyogenes	Pyogenic	Streptococcus pyogenes	Bra044	Contig	2019/04/11	SC	ftp://ftp.ncbi.nlm.nih.gov/genomes/all/GCF/900/985/015/GCF_900985015.1_19944_7_51
GCF_900985025.1	Y	MG_1	PRJNA224116	SAMEA3919049	F	na	Streptococcus pyogenes	Pyogenic	Streptococcus pyogenes	Bel004	Contig	2019/04/11	SC	ftp://ftp.ncbi.nlm.nih.gov/genomes/all/GCF/900/985/025/GCF_900985025.1_19944_7_50
GCF_900985045.1	Y	MG_1	PRJNA224116	SAMEA3919044	F	na	Streptococcus pyogenes	Pyogenic	Streptococcus pyogenes	Bra007	Contig	2019/04/11	SC	ftp://ftp.ncbi.nlm.nih.gov/genomes/all/GCF/900/985/045/GCF_900985045.1_19944_7_53
GCF_900985055.1	Y	MG_1	PRJNA224116	SAMEA3919043	F	na	Streptococcus pyogenes	Pyogenic	Streptococcus pyogenes	Bel003	Scaffold	2019/04/11	SC	ftp://ftp.ncbi.nlm.nih.gov/genomes/all/GCF/900/985/055/GCF_900985055.1_19944_7_54
GCF_900985065.1	Y	MG_1	PRJNA224116	SAMEA3919038	F	na	Streptococcus pyogenes	Pyogenic	Streptococcus pyogenes	Bra031	Contig	2019/04/11	SC	ftp://ftp.ncbi.nlm.nih.gov/genomes/all/GCF/900/985/065/GCF_900985065.1_19944_7_59
GCF_900985075.1	Y	MG_1	PRJNA224116	SAMEA3919039	F	na	Streptococcus pyogenes	Pyogenic	Streptococcus pyogenes	Bra043	Contig	2019/04/11	SC	ftp://ftp.ncbi.nlm.nih.gov/genomes/all/GCF/900/985/075/GCF_900985075.1_19944_7_58
GCF_900985135.1	Y	MG_1	PRJNA224116	SAMEA3919035	F	na	Streptococcus pyogenes	Pyogenic	Streptococcus pyogenes	Bel002	Scaffold	2019/04/11	SC	ftp://ftp.ncbi.nlm.nih.gov/genomes/all/GCF/900/985/135/GCF_900985135.1_19944_7_62
GCF_900985145.1	Y	MG_1	PRJNA224116	SAMEA3919029	F	na	Streptococcus pyogenes	Pyogenic	Streptococcus pyogenes	Bra018	Scaffold	2019/04/11	SC	ftp://ftp.ncbi.nlm.nih.gov/genomes/all/GCF/900/985/145/GCF_900985145.1_19944_7_68
GCF_900985155.1	Y	MG_1	PRJNA224116	SAMEA3919028	F	na	Streptococcus pyogenes	Pyogenic	Streptococcus pyogenes	Bra006	Scaffold	2019/04/11	SC	ftp://ftp.ncbi.nlm.nih.gov/genomes/all/GCF/900/985/155/GCF_900985155.1_19944_7_69
GCF_900985175.1	Y	MG_1	PRJNA224116	SAMEA3919092	F	na	Streptococcus pyogenes	Pyogenic	Streptococcus pyogenes	A829	Scaffold	2019/04/11	SC	ftp://ftp.ncbi.nlm.nih.gov/genomes/all/GCF/900/985/175/GCF_900985175.1_19944_7_7
GCF_900985215.1	Y	MG_1	PRJNA224116	SAMEA3919024	F	na	Streptococcus pyogenes	Pyogenic	Streptococcus pyogenes	GAS14267	Scaffold	2019/04/11	SC	ftp://ftp.ncbi.nlm.nih.gov/genomes/all/GCF/900/985/215/GCF_900985215.1_19944_7_73
GCF_900985275.1	Y	MG_1	PRJNA224116	SAMEA3919091	F	na	Streptococcus pyogenes	Pyogenic	Streptococcus pyogenes	Bra041	Scaffold	2019/04/11	SC	ftp://ftp.ncbi.nlm.nih.gov/genomes/all/GCF/900/985/275/GCF_900985275.1_19944_7_8
GCF_900985375.1	Y	MG_1	PRJNA224116	SAMEA3919090	F	na	Streptococcus pyogenes	Pyogenic	Streptococcus pyogenes	Bra029	Contig	2019/04/11	SC	ftp://ftp.ncbi.nlm.nih.gov/genomes/all/GCF/900/985/375/GCF_900985375.1_19944_7_9
GCF_900985405.1	Y	MG_1	PRJNA224116	SAMEA1711591	F	na	Streptococcus pyogenes	Pyogenic	Streptococcus pyogenes	K9679	Contig	2019/04/11	SC	ftp://ftp.ncbi.nlm.nih.gov/genomes/all/GCF/900/985/405/GCF_900985405.1_8898_2_73
GCF_900985415.1	Y	MG_1	PRJNA224116	SAMEA1711580	F	na	Streptococcus pyogenes	Pyogenic	Streptococcus pyogenes	K17786	Contig	2019/04/11	SC	ftp://ftp.ncbi.nlm.nih.gov/genomes/all/GCF/900/985/415/GCF_900985415.1_8898_2_74
GCF_900985475.1	Y	MG_1	PRJNA224116	SAMEA1711604	F	na	Streptococcus pyogenes	Pyogenic	Streptococcus pyogenes	K7792	Contig	2019/04/11	SC	ftp://ftp.ncbi.nlm.nih.gov/genomes/all/GCF/900/985/475/GCF_900985475.1_8898_2_8
GCF_900985495.1	Y	MG_1	PRJNA224116	SAMEA1711567	F	na	Streptococcus pyogenes	Pyogenic	Streptococcus pyogenes	K21633	Contig	2019/04/11	SC	ftp://ftp.ncbi.nlm.nih.gov/genomes/all/GCF/900/985/495/GCF_900985495.1_8898_3_12
GCF_900985525.1	Y	MG_1	PRJNA224116	SAMEA1711574	F	na	Streptococcus pyogenes	Pyogenic	Streptococcus pyogenes	K5679	Contig	2019/04/11	SC	ftp://ftp.ncbi.nlm.nih.gov/genomes/all/GCF/900/985/525/GCF_900985525.1_8898_3_21
GCF_900985535.1	Y	MG_1	PRJNA224116	SAMEA1711804	F	na	Streptococcus pyogenes	Pyogenic	Streptococcus pyogenes	K10167	Contig	2019/04/11	SC	ftp://ftp.ncbi.nlm.nih.gov/genomes/all/GCF/900/985/535/GCF_900985535.1_8898_3_19
GCF_900985545.1	Y	MG_1	PRJNA224116	SAMEA1711827	F	na	Streptococcus pyogenes	Pyogenic	Streptococcus pyogenes	K9521	Contig	2019/04/11	SC	ftp://ftp.ncbi.nlm.nih.gov/genomes/all/GCF/900/985/545/GCF_900985545.1_8898_3_20
GCF_900985565.1	Y	MG_1	PRJNA224116	SAMEA1711724	F	na	Streptococcus pyogenes	Pyogenic	Streptococcus pyogenes	K7219	Contig	2019/04/11	SC	ftp://ftp.ncbi.nlm.nih.gov/genomes/all/GCF/900/985/565/GCF_900985565.1_8898_3_14
GCF_900985575.1	Y	MG_1	PRJNA224116	SAMEA1711578	F	na	Streptococcus pyogenes	Pyogenic	Streptococcus pyogenes	K7393	Contig	2019/04/11	SC	ftp://ftp.ncbi.nlm.nih.gov/genomes/all/GCF/900/985/575/GCF_900985575.1_8898_3_23
GCF_900985585.1	Y	MG_1	PRJNA224116	SAMEA1711615	F	na	Streptococcus pyogenes	Pyogenic	Streptococcus pyogenes	K17097	Contig	2019/04/11	SC	ftp://ftp.ncbi.nlm.nih.gov/genomes/all/GCF/900/985/585/GCF_900985585.1_8898_3_25
GCF_900985605.1	Y	MG_1	PRJNA224116	SAMEA1711600	F	na	Streptococcus pyogenes	Pyogenic	Streptococcus pyogenes	K6222	Contig	2019/04/11	SC	ftp://ftp.ncbi.nlm.nih.gov/genomes/all/GCF/900/985/605/GCF_900985605.1_8898_3_24
GCF_900985635.1	Y	MG_1	PRJNA224116	SAMEA1711750	F	na	Streptococcus pyogenes	Pyogenic	Streptococcus pyogenes	K3944	Contig	2019/04/11	SC	ftp://ftp.ncbi.nlm.nih.gov/genomes/all/GCF/900/985/635/GCF_900985635.1_8898_3_30
GCF_900985645.1	Y	MG_1	PRJNA224116	SAMEA1711694	F	na	Streptococcus pyogenes	Pyogenic	Streptococcus pyogenes	K10311	Contig	2019/04/11	SC	ftp://ftp.ncbi.nlm.nih.gov/genomes/all/GCF/900/985/645/GCF_900985645.1_8898_3_31
GCF_900985655.1	Y	MG_1	PRJNA224116	SAMEA1711728	F	na	Streptococcus pyogenes	Pyogenic	Streptococcus pyogenes	K7846	Contig	2019/04/11	SC	ftp://ftp.ncbi.nlm.nih.gov/genomes/all/GCF/900/985/655/GCF_900985655.1_8898_3_33
GCF_900985685.1	Y	MG_1	PRJNA224116	SAMEA1711839	F	na	Streptococcus pyogenes	Pyogenic	Streptococcus pyogenes	K8543	Contig	2019/04/11	SC	ftp://ftp.ncbi.nlm.nih.gov/genomes/all/GCF/900/985/685/GCF_900985685.1_8898_3_35
GCF_900985745.1	Y	MG_1	PRJNA224116	SAMEA1711796	F	na	Streptococcus pyogenes	Pyogenic	Streptococcus pyogenes	K4350	Contig	2019/04/11	SC	ftp://ftp.ncbi.nlm.nih.gov/genomes/all/GCF/900/985/745/GCF_900985745.1_8898_3_41
GCF_900985795.1	Y	MG_1	PRJNA224116	SAMEA1711626	F	na	Streptococcus pyogenes	Pyogenic	Streptococcus pyogenes	K3808	Scaffold	2019/04/11	SC	ftp://ftp.ncbi.nlm.nih.gov/genomes/all/GCF/900/985/795/GCF_900985795.1_8898_3_49
GCF_900985845.1	Y	MG_1	PRJNA224116	SAMEA1711700	F	na	Streptococcus pyogenes	Pyogenic	Streptococcus pyogenes	K4134	Contig	2019/04/11	SC	ftp://ftp.ncbi.nlm.nih.gov/genomes/all/GCF/900/985/845/GCF_900985845.1_8898_3_53
GCF_900985875.1	Y	MG_1	PRJNA224116	SAMEA1711790	F	na	Streptococcus pyogenes	Pyogenic	Streptococcus pyogenes	K4656	Contig	2019/04/11	SC	ftp://ftp.ncbi.nlm.nih.gov/genomes/all/GCF/900/985/875/GCF_900985875.1_8898_3_56
GCF_900985915.1	Y	MG_1	PRJNA224116	SAMEA1711690	F	na	Streptococcus pyogenes	Pyogenic	Streptococcus pyogenes	K8396	Contig	2019/04/11	SC	ftp://ftp.ncbi.nlm.nih.gov/genomes/all/GCF/900/985/915/GCF_900985915.1_8898_3_6
GCF_900985945.1	Y	MG_1	PRJNA224116	SAMEA1711632	F	na	Streptococcus pyogenes	Pyogenic	Streptococcus pyogenes	K5690	Contig	2019/04/11	SC	ftp://ftp.ncbi.nlm.nih.gov/genomes/all/GCF/900/985/945/GCF_900985945.1_8898_3_63
GCF_900985955.1	Y	MG_1	PRJNA224116	SAMEA1711644	F	na	Streptococcus pyogenes	Pyogenic	Streptococcus pyogenes	K5727	Contig	2019/04/11	SC	ftp://ftp.ncbi.nlm.nih.gov/genomes/all/GCF/900/985/955/GCF_900985955.1_8898_3_64
GCF_900986015.1	Y	MG_1	PRJNA224116	SAMEA1711778	F	na	Streptococcus pyogenes	Pyogenic	Streptococcus pyogenes	K6008	Contig	2019/04/11	SC	ftp://ftp.ncbi.nlm.nih.gov/genomes/all/GCF/900/986/015/GCF_900986015.1_8898_3_71
GCF_900986035.1	Y	MG_1	PRJNA224116	SAMEA1711760	F	na	Streptococcus pyogenes	Pyogenic	Streptococcus pyogenes	K6038	Contig	2019/04/11	SC	ftp://ftp.ncbi.nlm.nih.gov/genomes/all/GCF/900/986/035/GCF_900986035.1_8898_3_72
GCF_900986045.1	Y	MG_1	PRJNA224116	SAMEA1711746	F	na	Streptococcus pyogenes	Pyogenic	Streptococcus pyogenes	K6048	Contig	2019/04/11	SC	ftp://ftp.ncbi.nlm.nih.gov/genomes/all/GCF/900/986/045/GCF_900986045.1_8898_3_73
GCF_900986095.1	Y	MG_1	PRJNA224116	SAMEA1711684	F	na	Streptococcus pyogenes	Pyogenic	Streptococcus pyogenes	K6428	Contig	2019/04/11	SC	ftp://ftp.ncbi.nlm.nih.gov/genomes/all/GCF/900/986/095/GCF_900986095.1_8898_3_78
GCF_900986135.1	Y	MG_1	PRJNA224116	SAMEA1711793	F	na	Streptococcus pyogenes	Pyogenic	Streptococcus pyogenes	K13179	Contig	2019/04/11	SC	ftp://ftp.ncbi.nlm.nih.gov/genomes/all/GCF/900/986/135/GCF_900986135.1_8898_3_85
GCF_900986155.1	Y	MG_1	PRJNA224116	SAMEA1711669	F	na	Streptococcus pyogenes	Pyogenic	Streptococcus pyogenes	K23182	Contig	2019/04/11	SC	ftp://ftp.ncbi.nlm.nih.gov/genomes/all/GCF/900/986/155/GCF_900986155.1_8898_3_89
GCF_900986165.1	Y	MG_1	PRJNA224116	SAMEA1711597	F	na	Streptococcus pyogenes	Pyogenic	Streptococcus pyogenes	K19961	Contig	2019/04/11	SC	ftp://ftp.ncbi.nlm.nih.gov/genomes/all/GCF/900/986/165/GCF_900986165.1_8898_3_9
GCF_900986215.1	Y	MG_1	PRJNA224116	SAMEA1711747	F	na	Streptococcus pyogenes	Pyogenic	Streptococcus pyogenes	K13389	Contig	2019/04/11	SC	ftp://ftp.ncbi.nlm.nih.gov/genomes/all/GCF/900/986/215/GCF_900986215.1_8898_3_94
GCF_900986225.1	Y	MG_1	PRJNA224116	SAMEA1711699	F	na	Streptococcus pyogenes	Pyogenic	Streptococcus pyogenes	K9189	Contig	2019/04/11	SC	ftp://ftp.ncbi.nlm.nih.gov/genomes/all/GCF/900/986/225/GCF_900986225.1_8898_3_95
GCF_900986415.1	Y	MG_1	PRJNA224116	SAMEA1876772	F	na	Streptococcus pyogenes	Pyogenic	Streptococcus pyogenes	31122V1S1	Contig	2019/04/11	SC	ftp://ftp.ncbi.nlm.nih.gov/genomes/all/GCF/900/986/415/GCF_900986415.1_9262_5_28
GCF_900986425.1	Y	MG_1	PRJNA224116	SAMEA1876776	F	na	Streptococcus pyogenes	Pyogenic	Streptococcus pyogenes	31129V1S2	Contig	2019/04/11	SC	ftp://ftp.ncbi.nlm.nih.gov/genomes/all/GCF/900/986/425/GCF_900986425.1_9262_5_29
GCF_900986515.1	Y	MG_1	PRJNA224116	SAMEA1876543	F	na	Streptococcus pyogenes	Pyogenic	Streptococcus pyogenes	31167V1S1	Contig	2019/04/11	SC	ftp://ftp.ncbi.nlm.nih.gov/genomes/all/GCF/900/986/515/GCF_900986515.1_9262_5_37
GCF_900986535.1	Y	MG_1	PRJNA224116	SAMEA1876746	F	na	Streptococcus pyogenes	Pyogenic	Streptococcus pyogenes	33017V1S1	Contig	2019/04/11	SC	ftp://ftp.ncbi.nlm.nih.gov/genomes/all/GCF/900/986/535/GCF_900986535.1_9262_5_42
GCF_900986625.1	Y	MG_1	PRJNA224116	SAMEA1876735	F	na	Streptococcus pyogenes	Pyogenic	Streptococcus pyogenes	33052V1S1	Contig	2019/04/11	SC	ftp://ftp.ncbi.nlm.nih.gov/genomes/all/GCF/900/986/625/GCF_900986625.1_9262_5_48
GCF_900986645.1	Y	MG_1	PRJNA224116	SAMEA1876579	F	na	Streptococcus pyogenes	Pyogenic	Streptococcus pyogenes	33061V1S1	Contig	2019/04/11	SC	ftp://ftp.ncbi.nlm.nih.gov/genomes/all/GCF/900/986/645/GCF_900986645.1_9262_5_49
GCF_900986735.1	Y	MG_1	PRJNA224116	SAMEA1876727	F	na	Streptococcus pyogenes	Pyogenic	Streptococcus pyogenes	33122V1S1	Contig	2019/04/11	SC	ftp://ftp.ncbi.nlm.nih.gov/genomes/all/GCF/900/986/735/GCF_900986735.1_9262_5_57
GCF_900986975.1	Y	MG_1	PRJNA224116	SAMEA1876529	F	na	Streptococcus pyogenes	Pyogenic	Streptococcus pyogenes	33191V2S1	Contig	2019/04/11	SC	ftp://ftp.ncbi.nlm.nih.gov/genomes/all/GCF/900/986/975/GCF_900986975.1_9262_5_80
GCF_900987015.1	Y	MG_1	PRJNA224116	SAMEA1876654	F	na	Streptococcus pyogenes	Pyogenic	Streptococcus pyogenes	33016V3S1	Contig	2019/04/11	SC	ftp://ftp.ncbi.nlm.nih.gov/genomes/all/GCF/900/987/015/GCF_900987015.1_9262_5_84
GCF_900987065.1	Y	MG_1	PRJNA224116	SAMEA1876591	F	na	Streptococcus pyogenes	Pyogenic	Streptococcus pyogenes	33107V3S1	Contig	2019/04/11	SC	ftp://ftp.ncbi.nlm.nih.gov/genomes/all/GCF/900/987/065/GCF_900987065.1_9262_5_89
GCF_900987255.1	Y	MG_1	PRJNA224116	SAMEA1876778	F	na	Streptococcus pyogenes	Pyogenic	Streptococcus pyogenes	31142V2S1	Contig	2019/04/11	SC	ftp://ftp.ncbi.nlm.nih.gov/genomes/all/GCF/900/987/255/GCF_900987255.1_9262_7_12
GCF_900987525.1	Y	MG_1	PRJNA224116	SAMEA1876710	F	na	Streptococcus pyogenes	Pyogenic	Streptococcus pyogenes	31104V2S1	Contig	2019/04/11	SC	ftp://ftp.ncbi.nlm.nih.gov/genomes/all/GCF/900/987/525/GCF_900987525.1_9262_7_4
GCF_900987605.1	Y	MG_1	PRJNA224116	SAMEA1876637	F	na	Streptococcus pyogenes	Pyogenic	Streptococcus pyogenes	31034V4S1	Contig	2019/04/11	SC	ftp://ftp.ncbi.nlm.nih.gov/genomes/all/GCF/900/987/605/GCF_900987605.1_9262_7_50
GCF_900987665.1	Y	MG_1	PRJNA224116	SAMEA1876610	F	na	Streptococcus pyogenes	Pyogenic	Streptococcus pyogenes	31059V4S1	Contig	2019/04/11	SC	ftp://ftp.ncbi.nlm.nih.gov/genomes/all/GCF/900/987/665/GCF_900987665.1_9262_7_56
GCF_900987835.1	Y	MG_1	PRJNA224116	SAMEA1876643	F	na	Streptococcus pyogenes	Pyogenic	Streptococcus pyogenes	31124V4S1	Contig	2019/04/11	SC	ftp://ftp.ncbi.nlm.nih.gov/genomes/all/GCF/900/987/835/GCF_900987835.1_9262_7_71
GCF_900987865.1	Y	MG_1	PRJNA224116	SAMEA1876756	F	na	Streptococcus pyogenes	Pyogenic	Streptococcus pyogenes	31134V4S1	Contig	2019/04/11	SC	ftp://ftp.ncbi.nlm.nih.gov/genomes/all/GCF/900/987/865/GCF_900987865.1_9262_7_75
GCF_900988005.1	Y	MG_1	PRJNA224116	SAMEA1876787	F	na	Streptococcus pyogenes	Pyogenic	Streptococcus pyogenes	33138V3T1	Contig	2019/04/11	SC	ftp://ftp.ncbi.nlm.nih.gov/genomes/all/GCF/900/988/005/GCF_900988005.1_9262_7_89
GCF_900988605.1	Y	MG_1	PRJNA224116	SAMEA1523560	F	na	Streptococcus pyogenes	Pyogenic	Streptococcus pyogenes	44002V1S1	Contig	2019/04/11	SC	ftp://ftp.ncbi.nlm.nih.gov/genomes/all/GCF/900/988/605/GCF_900988605.1_8113_7_57
GCF_900988875.1	Y	MG_1	PRJNA224116	SAMEA1695403	F	na	Streptococcus pyogenes	Pyogenic	Streptococcus pyogenes	K48186	Contig	2019/04/11	SC	ftp://ftp.ncbi.nlm.nih.gov/genomes/all/GCF/900/988/875/GCF_900988875.1_8849_2_17
GCF_900988925.1	Y	MG_1	PRJNA224116	SAMEA1695411	F	na	Streptococcus pyogenes	Pyogenic	Streptococcus pyogenes	K16727	Contig	2019/04/11	SC	ftp://ftp.ncbi.nlm.nih.gov/genomes/all/GCF/900/988/925/GCF_900988925.1_8849_2_2
GCF_900988935.1	Y	MG_1	PRJNA224116	SAMEA1695475	F	na	Streptococcus pyogenes	Pyogenic	Streptococcus pyogenes	K46187	Contig	2019/04/11	SC	ftp://ftp.ncbi.nlm.nih.gov/genomes/all/GCF/900/988/935/GCF_900988935.1_8849_2_23
GCF_900989025.1	Y	MG_1	PRJNA224116	SAMEA1695385	F	na	Streptococcus pyogenes	Pyogenic	Streptococcus pyogenes	K36535	Contig	2019/04/11	SC	ftp://ftp.ncbi.nlm.nih.gov/genomes/all/GCF/900/989/025/GCF_900989025.1_8849_2_33
GCF_900989035.1	Y	MG_1	PRJNA224116	SAMEA1695418	F	na	Streptococcus pyogenes	Pyogenic	Streptococcus pyogenes	K37741	Contig	2019/04/11	SC	ftp://ftp.ncbi.nlm.nih.gov/genomes/all/GCF/900/989/035/GCF_900989035.1_8849_2_34
GCF_900989045.1	Y	MG_1	PRJNA224116	SAMEA1695421	F	na	Streptococcus pyogenes	Pyogenic	Streptococcus pyogenes	K5797	Contig	2019/04/11	SC	ftp://ftp.ncbi.nlm.nih.gov/genomes/all/GCF/900/989/045/GCF_900989045.1_8849_2_35
GCF_900989065.1	Y	MG_1	PRJNA224116	SAMEA1695390	F	na	Streptococcus pyogenes	Pyogenic	Streptococcus pyogenes	K45527	Contig	2019/04/11	SC	ftp://ftp.ncbi.nlm.nih.gov/genomes/all/GCF/900/989/065/GCF_900989065.1_8849_2_37
GCF_900989125.1	Y	MG_1	PRJNA224116	SAMEA1695457	F	na	Streptococcus pyogenes	Pyogenic	Streptococcus pyogenes	K44582	Contig	2019/04/11	SC	ftp://ftp.ncbi.nlm.nih.gov/genomes/all/GCF/900/989/125/GCF_900989125.1_8849_2_42
GCF_900989165.1	Y	MG_1	PRJNA224116	SAMEA1695442	F	na	Streptococcus pyogenes	Pyogenic	Streptococcus pyogenes	K49285	Contig	2019/04/11	SC	ftp://ftp.ncbi.nlm.nih.gov/genomes/all/GCF/900/989/165/GCF_900989165.1_8849_2_46
GCF_900989295.1	Y	MG_1	PRJNA224116	SAMEA1695469	F	na	Streptococcus pyogenes	Pyogenic	Streptococcus pyogenes	K22633	Contig	2019/04/11	SC	ftp://ftp.ncbi.nlm.nih.gov/genomes/all/GCF/900/989/295/GCF_900989295.1_8849_2_58
GCF_900989305.1	Y	MG_1	PRJNA224116	SAMEA1695388	F	na	Streptococcus pyogenes	Pyogenic	Streptococcus pyogenes	K23799	Contig	2019/04/11	SC	ftp://ftp.ncbi.nlm.nih.gov/genomes/all/GCF/900/989/305/GCF_900989305.1_8849_2_6
GCF_900989335.1	Y	MG_1	PRJNA224116	SAMEA1695429	F	na	Streptococcus pyogenes	Pyogenic	Streptococcus pyogenes	K22813	Contig	2019/04/11	SC	ftp://ftp.ncbi.nlm.nih.gov/genomes/all/GCF/900/989/335/GCF_900989335.1_8849_2_60
GCF_900989365.1	Y	MG_1	PRJNA224116	SAMEA1695459	F	na	Streptococcus pyogenes	Pyogenic	Streptococcus pyogenes	K19083	Contig	2019/04/11	SC	ftp://ftp.ncbi.nlm.nih.gov/genomes/all/GCF/900/989/365/GCF_900989365.1_8849_2_64
GCF_900989385.1	Y	MG_1	PRJNA224116	SAMEA1695423	F	na	Streptococcus pyogenes	Pyogenic	Streptococcus pyogenes	K5698	Contig	2019/04/11	SC	ftp://ftp.ncbi.nlm.nih.gov/genomes/all/GCF/900/989/385/GCF_900989385.1_8849_2_66
GCF_900989405.1	Y	MG_1	PRJNA224116	SAMEA1695383	F	na	Streptococcus pyogenes	Pyogenic	Streptococcus pyogenes	K38181	Contig	2019/04/11	SC	ftp://ftp.ncbi.nlm.nih.gov/genomes/all/GCF/900/989/405/GCF_900989405.1_8849_2_71
GCF_900989415.1	Y	MG_1	PRJNA224116	SAMEA1695431	F	na	Streptococcus pyogenes	Pyogenic	Streptococcus pyogenes	K40810	Contig	2019/04/11	SC	ftp://ftp.ncbi.nlm.nih.gov/genomes/all/GCF/900/989/415/GCF_900989415.1_8849_2_73
GCF_900989445.1	Y	MG_1	PRJNA224116	SAMEA1695396	F	na	Streptococcus pyogenes	Pyogenic	Streptococcus pyogenes	K23617	Contig	2019/04/11	SC	ftp://ftp.ncbi.nlm.nih.gov/genomes/all/GCF/900/989/445/GCF_900989445.1_8849_2_75
GCF_900989455.1	Y	MG_1	PRJNA224116	SAMEA1695434	F	na	Streptococcus pyogenes	Pyogenic	Streptococcus pyogenes	K6108	Contig	2019/04/11	SC	ftp://ftp.ncbi.nlm.nih.gov/genomes/all/GCF/900/989/455/GCF_900989455.1_8849_2_77
GCF_900989605.1	Y	MG_1	PRJNA224116	SAMEA1711775	F	na	Streptococcus pyogenes	Pyogenic	Streptococcus pyogenes	K41948	Contig	2019/04/11	SC	ftp://ftp.ncbi.nlm.nih.gov/genomes/all/GCF/900/989/605/GCF_900989605.1_8898_1_17
GCF_900989615.1	Y	MG_1	PRJNA224116	SAMEA1711569	F	na	Streptococcus pyogenes	Pyogenic	Streptococcus pyogenes	K42600	Contig	2019/04/11	SC	ftp://ftp.ncbi.nlm.nih.gov/genomes/all/GCF/900/989/615/GCF_900989615.1_8898_1_18
GCF_900989625.1	Y	MG_1	PRJNA224116	SAMEA1711592	F	na	Streptococcus pyogenes	Pyogenic	Streptococcus pyogenes	K37164	Contig	2019/04/11	SC	ftp://ftp.ncbi.nlm.nih.gov/genomes/all/GCF/900/989/625/GCF_900989625.1_8898_1_19
GCF_900989705.1	Y	MG_1	PRJNA224116	SAMEA1711671	F	na	Streptococcus pyogenes	Pyogenic	Streptococcus pyogenes	K17716	Contig	2019/04/11	SC	ftp://ftp.ncbi.nlm.nih.gov/genomes/all/GCF/900/989/705/GCF_900989705.1_8898_1_25
GCF_900989805.1	Y	MG_1	PRJNA224116	SAMEA1711624	F	na	Streptococcus pyogenes	Pyogenic	Streptococcus pyogenes	K29655	Contig	2019/04/11	SC	ftp://ftp.ncbi.nlm.nih.gov/genomes/all/GCF/900/989/805/GCF_900989805.1_8898_1_36
GCF_900989825.1	Y	MG_1	PRJNA224116	SAMEA1711586	F	na	Streptococcus pyogenes	Pyogenic	Streptococcus pyogenes	K30067	Contig	2019/04/11	SC	ftp://ftp.ncbi.nlm.nih.gov/genomes/all/GCF/900/989/825/GCF_900989825.1_8898_1_38
GCF_900989845.1	Y	MG_1	PRJNA224116	SAMEA1711616	F	na	Streptococcus pyogenes	Pyogenic	Streptococcus pyogenes	K31539	Contig	2019/04/11	SC	ftp://ftp.ncbi.nlm.nih.gov/genomes/all/GCF/900/989/845/GCF_900989845.1_8898_1_40
GCF_900989935.1	Y	MG_1	PRJNA224116	SAMEA1711702	F	na	Streptococcus pyogenes	Pyogenic	Streptococcus pyogenes	K20747	Contig	2019/04/11	SC	ftp://ftp.ncbi.nlm.nih.gov/genomes/all/GCF/900/989/935/GCF_900989935.1_8898_1_49
GCF_900989945.1	Y	MG_1	PRJNA224116	SAMEA1711837	F	na	Streptococcus pyogenes	Pyogenic	Streptococcus pyogenes	K33951	Contig	2019/04/11	SC	ftp://ftp.ncbi.nlm.nih.gov/genomes/all/GCF/900/989/945/GCF_900989945.1_8898_1_5
GCF_900989965.1	Y	MG_1	PRJNA224116	SAMEA1711664	F	na	Streptococcus pyogenes	Pyogenic	Streptococcus pyogenes	K20910	Contig	2019/04/11	SC	ftp://ftp.ncbi.nlm.nih.gov/genomes/all/GCF/900/989/965/GCF_900989965.1_8898_1_51
GCF_900990045.1	Y	MG_1	PRJNA224116	SAMEA1711770	F	na	Streptococcus pyogenes	Pyogenic	Streptococcus pyogenes	K33983	Contig	2019/04/11	SC	ftp://ftp.ncbi.nlm.nih.gov/genomes/all/GCF/900/990/045/GCF_900990045.1_8898_1_6
GCF_900990055.1	Y	MG_1	PRJNA224116	SAMEA1711838	F	na	Streptococcus pyogenes	Pyogenic	Streptococcus pyogenes	K11243	Contig	2019/04/11	SC	ftp://ftp.ncbi.nlm.nih.gov/genomes/all/GCF/900/990/055/GCF_900990055.1_8898_1_59
GCF_900990065.1	Y	MG_1	PRJNA224116	SAMEA1711766	F	na	Streptococcus pyogenes	Pyogenic	Streptococcus pyogenes	K11319	Contig	2019/04/11	SC	ftp://ftp.ncbi.nlm.nih.gov/genomes/all/GCF/900/990/065/GCF_900990065.1_8898_1_60
GCF_900990075.1	Y	MG_1	PRJNA224116	SAMEA1711752	F	na	Streptococcus pyogenes	Pyogenic	Streptococcus pyogenes	K13190	Contig	2019/04/11	SC	ftp://ftp.ncbi.nlm.nih.gov/genomes/all/GCF/900/990/075/GCF_900990075.1_8898_1_63
GCF_900990095.1	Y	MG_1	PRJNA224116	SAMEA1711785	F	na	Streptococcus pyogenes	Pyogenic	Streptococcus pyogenes	K13065	Contig	2019/04/11	SC	ftp://ftp.ncbi.nlm.nih.gov/genomes/all/GCF/900/990/095/GCF_900990095.1_8898_1_61
GCF_900990135.1	Y	MG_1	PRJNA224116	SAMEA1711639	F	na	Streptococcus pyogenes	Pyogenic	Streptococcus pyogenes	K23745	Contig	2019/04/11	SC	ftp://ftp.ncbi.nlm.nih.gov/genomes/all/GCF/900/990/135/GCF_900990135.1_8898_1_68
GCF_900990195.1	Y	MG_1	PRJNA224116	SAMEA1711765	F	na	Streptococcus pyogenes	Pyogenic	Streptococcus pyogenes	K24525	Contig	2019/04/11	SC	ftp://ftp.ncbi.nlm.nih.gov/genomes/all/GCF/900/990/195/GCF_900990195.1_8898_1_74
GCF_900990235.1	Y	MG_1	PRJNA224116	SAMEA1711718	F	na	Streptococcus pyogenes	Pyogenic	Streptococcus pyogenes	K35909	Contig	2019/04/11	SC	ftp://ftp.ncbi.nlm.nih.gov/genomes/all/GCF/900/990/235/GCF_900990235.1_8898_1_8
GCF_900990255.1	Y	MG_1	PRJNA224116	SAMEA1711742	F	na	Streptococcus pyogenes	Pyogenic	Streptococcus pyogenes	K19875	Contig	2019/04/11	SC	ftp://ftp.ncbi.nlm.nih.gov/genomes/all/GCF/900/990/255/GCF_900990255.1_8898_1_81
GCF_900990275.1	Y	MG_1	PRJNA224116	SAMEA1711686	F	na	Streptococcus pyogenes	Pyogenic	Streptococcus pyogenes	K19952	Contig	2019/04/11	SC	ftp://ftp.ncbi.nlm.nih.gov/genomes/all/GCF/900/990/275/GCF_900990275.1_8898_1_84
GCF_900990315.1	Y	MG_1	PRJNA224116	SAMEA1711581	F	na	Streptococcus pyogenes	Pyogenic	Streptococcus pyogenes	K36395	Contig	2019/04/11	SC	ftp://ftp.ncbi.nlm.nih.gov/genomes/all/GCF/900/990/315/GCF_900990315.1_8898_1_87
GCF_900990325.1	Y	MG_1	PRJNA224116	SAMEA1711697	F	na	Streptococcus pyogenes	Pyogenic	Streptococcus pyogenes	K36067	Contig	2019/04/11	SC	ftp://ftp.ncbi.nlm.nih.gov/genomes/all/GCF/900/990/325/GCF_900990325.1_8898_1_9
GCF_900990345.1	Y	MG_1	PRJNA224116	SAMEA1711720	F	na	Streptococcus pyogenes	Pyogenic	Streptococcus pyogenes	K31028	Contig	2019/04/11	SC	ftp://ftp.ncbi.nlm.nih.gov/genomes/all/GCF/900/990/345/GCF_900990345.1_8898_1_91
GCF_900990405.1	Y	MG_1	PRJNA224116	SAMEA1711651	F	na	Streptococcus pyogenes	Pyogenic	Streptococcus pyogenes	K7541	Contig	2019/04/11	SC	ftp://ftp.ncbi.nlm.nih.gov/genomes/all/GCF/900/990/405/GCF_900990405.1_8898_2_10
GCF_900990505.1	Y	MG_1	PRJNA224116	SAMEA1711800	F	na	Streptococcus pyogenes	Pyogenic	Streptococcus pyogenes	K7829	Contig	2019/04/11	SC	ftp://ftp.ncbi.nlm.nih.gov/genomes/all/GCF/900/990/505/GCF_900990505.1_8898_2_3
GCF_900990545.1	Y	MG_1	PRJNA224116	SAMEA1711577	F	na	Streptococcus pyogenes	Pyogenic	Streptococcus pyogenes	K10987	Contig	2019/04/11	SC	ftp://ftp.ncbi.nlm.nih.gov/genomes/all/GCF/900/990/545/GCF_900990545.1_8898_2_34
GCF_900990555.1	Y	MG_1	PRJNA224116	SAMEA1711563	F	na	Streptococcus pyogenes	Pyogenic	Streptococcus pyogenes	K10238	Contig	2019/04/11	SC	ftp://ftp.ncbi.nlm.nih.gov/genomes/all/GCF/900/990/555/GCF_900990555.1_8898_2_35
GCF_900990565.1	Y	MG_1	PRJNA224116	SAMEA1711565	F	na	Streptococcus pyogenes	Pyogenic	Streptococcus pyogenes	K9440	Contig	2019/04/11	SC	ftp://ftp.ncbi.nlm.nih.gov/genomes/all/GCF/900/990/565/GCF_900990565.1_8898_2_36
GCF_900990575.1	Y	MG_1	PRJNA224116	SAMEA1711619	F	na	Streptococcus pyogenes	Pyogenic	Streptococcus pyogenes	K19639	Contig	2019/04/11	SC	ftp://ftp.ncbi.nlm.nih.gov/genomes/all/GCF/900/990/575/GCF_900990575.1_8898_2_37
GCF_900990585.1	Y	MG_1	PRJNA224116	SAMEA1711606	F	na	Streptococcus pyogenes	Pyogenic	Streptococcus pyogenes	K17494	Contig	2019/04/11	SC	ftp://ftp.ncbi.nlm.nih.gov/genomes/all/GCF/900/990/585/GCF_900990585.1_8898_2_38
GCF_900990605.1	Y	MG_1	PRJNA224116	SAMEA1711589	F	na	Streptococcus pyogenes	Pyogenic	Streptococcus pyogenes	K7908	Contig	2019/04/11	SC	ftp://ftp.ncbi.nlm.nih.gov/genomes/all/GCF/900/990/605/GCF_900990605.1_8898_2_4
GCF_900990615.1	Y	MG_1	PRJNA224116	SAMEA1711771	F	na	Streptococcus pyogenes	Pyogenic	Streptococcus pyogenes	K7175	Contig	2019/04/11	SC	ftp://ftp.ncbi.nlm.nih.gov/genomes/all/GCF/900/990/615/GCF_900990615.1_8898_2_40
GCF_900990675.1	Y	MG_1	PRJNA224116	SAMEA1711657	F	na	Streptococcus pyogenes	Pyogenic	Streptococcus pyogenes	K4761	Contig	2019/04/11	SC	ftp://ftp.ncbi.nlm.nih.gov/genomes/all/GCF/900/990/675/GCF_900990675.1_8898_2_49
GCF_900990695.1	Y	MG_1	PRJNA224116	SAMEA1711675	F	na	Streptococcus pyogenes	Pyogenic	Streptococcus pyogenes	K3573	Contig	2019/04/11	SC	ftp://ftp.ncbi.nlm.nih.gov/genomes/all/GCF/900/990/695/GCF_900990695.1_8898_2_53
GCF_900990715.1	Y	MG_1	PRJNA224116	SAMEA1711751	F	na	Streptococcus pyogenes	Pyogenic	Streptococcus pyogenes	K3525	Contig	2019/04/11	SC	ftp://ftp.ncbi.nlm.nih.gov/genomes/all/GCF/900/990/715/GCF_900990715.1_8898_2_56
GCF_900990725.1	Y	MG_1	PRJNA224116	SAMEA1711693	F	na	Streptococcus pyogenes	Pyogenic	Streptococcus pyogenes	K7559	Contig	2019/04/11	SC	ftp://ftp.ncbi.nlm.nih.gov/genomes/all/GCF/900/990/725/GCF_900990725.1_8898_2_55
GCF_900990765.1	Y	MG_1	PRJNA224116	SAMEA1711623	F	na	Streptococcus pyogenes	Pyogenic	Streptococcus pyogenes	K4973	Contig	2019/04/11	SC	ftp://ftp.ncbi.nlm.nih.gov/genomes/all/GCF/900/990/765/GCF_900990765.1_8898_2_62
GCF_900990785.1	Y	MG_1	PRJNA224116	SAMEA1711672	F	na	Streptococcus pyogenes	Pyogenic	Streptococcus pyogenes	K13045	Contig	2019/04/11	SC	ftp://ftp.ncbi.nlm.nih.gov/genomes/all/GCF/900/990/785/GCF_900990785.1_8898_2_66
GCF_900990795.1	Y	MG_1	PRJNA224116	SAMEA1711596	F	na	Streptococcus pyogenes	Pyogenic	Streptococcus pyogenes	K7736	Contig	2019/04/11	SC	ftp://ftp.ncbi.nlm.nih.gov/genomes/all/GCF/900/990/795/GCF_900990795.1_8898_2_7
GCF_900990935.1	Y	MG_1	PRJNA224116	SAMEA864226	F	na	Streptococcus pyogenes	Pyogenic	Streptococcus pyogenes	NS43	Contig	2019/04/11	SC	ftp://ftp.ncbi.nlm.nih.gov/genomes/all/GCF/900/990/935/GCF_900990935.1_5817_5_6
GCF_900990975.1	Y	MG_1	PRJNA224116	SAMEA1031413	F	na	Streptococcus pyogenes	Pyogenic	Streptococcus pyogenes	HKU30	Contig	2019/04/11	SC	ftp://ftp.ncbi.nlm.nih.gov/genomes/all/GCF/900/990/975/GCF_900990975.1_6753_5_30
GCF_900991055.1	Y	MG_1	PRJNA224116	SAMEA1034043	F	na	Streptococcus pyogenes	Pyogenic	Streptococcus pyogenes	HKU397	Scaffold	2019/04/11	SC	ftp://ftp.ncbi.nlm.nih.gov/genomes/all/GCF/900/991/055/GCF_900991055.1_6817_4_36
GCF_900991085.1	Y	MG_1	PRJNA224116	SAMEA1407102	F	na	Streptococcus pyogenes	Pyogenic	Streptococcus pyogenes	NS16	Contig	2019/04/11	SC	ftp://ftp.ncbi.nlm.nih.gov/genomes/all/GCF/900/991/085/GCF_900991085.1_7368_6_51
GCF_900991115.1	Y	MG_1	PRJNA224116	SAMEA1407002	F	na	Streptococcus pyogenes	Pyogenic	Streptococcus pyogenes	NS237	Contig	2019/04/11	SC	ftp://ftp.ncbi.nlm.nih.gov/genomes/all/GCF/900/991/115/GCF_900991115.1_7368_6_55
GCF_900991125.1	Y	MG_1	PRJNA224116	SAMEA1406981	F	na	Streptococcus pyogenes	Pyogenic	Streptococcus pyogenes	NS234	Contig	2019/04/11	SC	ftp://ftp.ncbi.nlm.nih.gov/genomes/all/GCF/900/991/125/GCF_900991125.1_7368_6_54
GCF_900991135.1	Y	MG_1	PRJNA224116	SAMEA1407017	F	na	Streptococcus pyogenes	Pyogenic	Streptococcus pyogenes	NS343	Contig	2019/04/11	SC	ftp://ftp.ncbi.nlm.nih.gov/genomes/all/GCF/900/991/135/GCF_900991135.1_7368_6_56
GCF_900991165.1	Y	MG_1	PRJNA224116	SAMEA1407051	F	na	Streptococcus pyogenes	Pyogenic	Streptococcus pyogenes	NS909	Contig	2019/04/11	SC	ftp://ftp.ncbi.nlm.nih.gov/genomes/all/GCF/900/991/165/GCF_900991165.1_7368_6_60
GCF_900991185.1	Y	MG_1	PRJNA224116	SAMEA1407064	F	na	Streptococcus pyogenes	Pyogenic	Streptococcus pyogenes	NS1185	Contig	2019/04/11	SC	ftp://ftp.ncbi.nlm.nih.gov/genomes/all/GCF/900/991/185/GCF_900991185.1_7368_6_63
GCF_900991195.1	Y	MG_1	PRJNA224116	SAMEA1407078	F	na	Streptococcus pyogenes	Pyogenic	Streptococcus pyogenes	NS1043	Contig	2019/04/11	SC	ftp://ftp.ncbi.nlm.nih.gov/genomes/all/GCF/900/991/195/GCF_900991195.1_7368_6_61
GCF_900991205.1	Y	MG_1	PRJNA224116	SAMEA1407073	F	na	Streptococcus pyogenes	Pyogenic	Streptococcus pyogenes	NS1051	Contig	2019/04/11	SC	ftp://ftp.ncbi.nlm.nih.gov/genomes/all/GCF/900/991/205/GCF_900991205.1_7368_6_62
GCF_900991215.1	Y	MG_1	PRJNA224116	SAMEA1407119	F	na	Streptococcus pyogenes	Pyogenic	Streptococcus pyogenes	NS1353	Contig	2019/04/11	SC	ftp://ftp.ncbi.nlm.nih.gov/genomes/all/GCF/900/991/215/GCF_900991215.1_7368_6_65
GCF_900991255.1	Y	MG_1	PRJNA224116	SAMEA1406958	F	na	Streptococcus pyogenes	Pyogenic	Streptococcus pyogenes	NS1498	Contig	2019/04/11	SC	ftp://ftp.ncbi.nlm.nih.gov/genomes/all/GCF/900/991/255/GCF_900991255.1_7368_6_68
GCF_900991285.1	Y	MG_1	PRJNA224116	SAMEA1407014	F	na	Streptococcus pyogenes	Pyogenic	Streptococcus pyogenes	NS1951	Contig	2019/04/11	SC	ftp://ftp.ncbi.nlm.nih.gov/genomes/all/GCF/900/991/285/GCF_900991285.1_7368_6_73
GCF_900991315.1	Y	MG_1	PRJNA224116	SAMEA1407048	F	na	Streptococcus pyogenes	Pyogenic	Streptococcus pyogenes	NS1988	Contig	2019/04/11	SC	ftp://ftp.ncbi.nlm.nih.gov/genomes/all/GCF/900/991/315/GCF_900991315.1_7368_6_76
GCF_900991365.1	Y	MG_1	PRJNA224116	SAMEA1407118	F	na	Streptococcus pyogenes	Pyogenic	Streptococcus pyogenes	NS2023	Contig	2019/04/11	SC	ftp://ftp.ncbi.nlm.nih.gov/genomes/all/GCF/900/991/365/GCF_900991365.1_7368_6_80
GCF_900991395.1	Y	MG_1	PRJNA224116	SAMEA1407088	F	na	Streptococcus pyogenes	Pyogenic	Streptococcus pyogenes	NS2128	Contig	2019/04/11	SC	ftp://ftp.ncbi.nlm.nih.gov/genomes/all/GCF/900/991/395/GCF_900991395.1_7368_6_81
GCF_900991405.1	Y	MG_1	PRJNA224116	SAMEA1406966	F	na	Streptococcus pyogenes	Pyogenic	Streptococcus pyogenes	NS2416	Contig	2019/04/11	SC	ftp://ftp.ncbi.nlm.nih.gov/genomes/all/GCF/900/991/405/GCF_900991405.1_7368_6_83
GCF_900991415.1	Y	MG_1	PRJNA224116	SAMEA1406945	F	na	Streptococcus pyogenes	Pyogenic	Streptococcus pyogenes	NS2671	Contig	2019/04/11	SC	ftp://ftp.ncbi.nlm.nih.gov/genomes/all/GCF/900/991/415/GCF_900991415.1_7368_6_87
GCF_900991505.1	Y	MG_1	PRJNA224116	SAMEA1407100	F	na	Streptococcus pyogenes	Pyogenic	Streptococcus pyogenes	NS3275	Contig	2019/04/11	SC	ftp://ftp.ncbi.nlm.nih.gov/genomes/all/GCF/900/991/505/GCF_900991505.1_7368_6_93
GCF_900991575.1	Y	MG_1	PRJNA224116	SAMEA1406988	F	na	Streptococcus pyogenes	Pyogenic	Streptococcus pyogenes	NS4618	Contig	2019/04/11	SC	ftp://ftp.ncbi.nlm.nih.gov/genomes/all/GCF/900/991/575/GCF_900991575.1_7368_7_13
GCF_900991615.1	Y	MG_1	PRJNA224116	SAMEA1407009	F	na	Streptococcus pyogenes	Pyogenic	Streptococcus pyogenes	NS4706	Contig	2019/04/11	SC	ftp://ftp.ncbi.nlm.nih.gov/genomes/all/GCF/900/991/615/GCF_900991615.1_7368_7_16
GCF_900991625.1	Y	MG_1	PRJNA224116	SAMEA1407046	F	na	Streptococcus pyogenes	Pyogenic	Streptococcus pyogenes	NS4766	Contig	2019/04/11	SC	ftp://ftp.ncbi.nlm.nih.gov/genomes/all/GCF/900/991/625/GCF_900991625.1_7368_7_19
GCF_900991635.1	Y	MG_1	PRJNA224116	SAMEA1407039	F	na	Streptococcus pyogenes	Pyogenic	Streptococcus pyogenes	NS4743	Contig	2019/04/11	SC	ftp://ftp.ncbi.nlm.nih.gov/genomes/all/GCF/900/991/635/GCF_900991635.1_7368_7_18
GCF_900991645.1	Y	MG_1	PRJNA224116	SAMEA1407037	F	na	Streptococcus pyogenes	Pyogenic	Streptococcus pyogenes	NS3523	Contig	2019/04/11	SC	ftp://ftp.ncbi.nlm.nih.gov/genomes/all/GCF/900/991/645/GCF_900991645.1_7368_7_2
GCF_900991675.1	Y	MG_1	PRJNA224116	SAMEA1406942	F	na	Streptococcus pyogenes	Pyogenic	Streptococcus pyogenes	NS4800	Contig	2019/04/11	SC	ftp://ftp.ncbi.nlm.nih.gov/genomes/all/GCF/900/991/675/GCF_900991675.1_7368_7_21
GCF_900991685.1	Y	MG_1	PRJNA224116	SAMEA1406959	F	na	Streptococcus pyogenes	Pyogenic	Streptococcus pyogenes	NS4804	Contig	2019/04/11	SC	ftp://ftp.ncbi.nlm.nih.gov/genomes/all/GCF/900/991/685/GCF_900991685.1_7368_7_22
GCF_900991765.1	Y	MG_1	PRJNA224116	SAMEA1407068	F	na	Streptococcus pyogenes	Pyogenic	Streptococcus pyogenes	NS5340	Contig	2019/04/11	SC	ftp://ftp.ncbi.nlm.nih.gov/genomes/all/GCF/900/991/765/GCF_900991765.1_7368_7_31
GCF_900991805.1	Y	MG_1	PRJNA224116	SAMEA1407091	F	na	Streptococcus pyogenes	Pyogenic	Streptococcus pyogenes	NS5427	Scaffold	2019/04/11	SC	ftp://ftp.ncbi.nlm.nih.gov/genomes/all/GCF/900/991/805/GCF_900991805.1_7368_7_33
GCF_900991815.1	Y	MG_1	PRJNA224116	SAMEA1407122	F	na	Streptococcus pyogenes	Pyogenic	Streptococcus pyogenes	NS5496	Contig	2019/04/11	SC	ftp://ftp.ncbi.nlm.nih.gov/genomes/all/GCF/900/991/815/GCF_900991815.1_7368_7_35
GCF_900991835.1	Y	MG_1	PRJNA224116	SAMEA1406965	F	na	Streptococcus pyogenes	Pyogenic	Streptococcus pyogenes	NS5544	Contig	2019/04/11	SC	ftp://ftp.ncbi.nlm.nih.gov/genomes/all/GCF/900/991/835/GCF_900991835.1_7368_7_37
GCF_900991895.1	Y	MG_1	PRJNA224116	SAMEA1407031	F	na	Streptococcus pyogenes	Pyogenic	Streptococcus pyogenes	NS5749	Contig	2019/04/11	SC	ftp://ftp.ncbi.nlm.nih.gov/genomes/all/GCF/900/991/895/GCF_900991895.1_7368_7_40
GCF_900991915.1	Y	MG_1	PRJNA224116	SAMEA1407003	F	na	Streptococcus pyogenes	Pyogenic	Streptococcus pyogenes	NS5694	Contig	2019/04/11	SC	ftp://ftp.ncbi.nlm.nih.gov/genomes/all/GCF/900/991/915/GCF_900991915.1_7368_7_44
GCF_900991955.1	Y	MG_1	PRJNA224116	SAMEA1407010	F	na	Streptococcus pyogenes	Pyogenic	Streptococcus pyogenes	NS3850	Contig	2019/04/11	SC	ftp://ftp.ncbi.nlm.nih.gov/genomes/all/GCF/900/991/955/GCF_900991955.1_7368_7_5
GCF_900991965.1	Y	MG_1	PRJNA224116	SAMEA1407004	F	na	Streptococcus pyogenes	Pyogenic	Streptococcus pyogenes	NS3870	Contig	2019/04/11	SC	ftp://ftp.ncbi.nlm.nih.gov/genomes/all/GCF/900/991/965/GCF_900991965.1_7368_7_6
GCF_900992005.1	Y	MG_1	PRJNA224116	SAMEA1406971	F	na	Streptococcus pyogenes	Pyogenic	Streptococcus pyogenes	NS5782	Contig	2019/04/11	SC	ftp://ftp.ncbi.nlm.nih.gov/genomes/all/GCF/900/992/005/GCF_900992005.1_7368_8_49
GCF_900992045.1	Y	MG_1	PRJNA224116	SAMEA1407121	F	na	Streptococcus pyogenes	Pyogenic	Streptococcus pyogenes	NS6078	Contig	2019/04/11	SC	ftp://ftp.ncbi.nlm.nih.gov/genomes/all/GCF/900/992/045/GCF_900992045.1_7368_8_53
GCF_900992065.1	Y	MG_1	PRJNA224116	SAMEA1407087	F	na	Streptococcus pyogenes	Pyogenic	Streptococcus pyogenes	NS6142	Contig	2019/04/11	SC	ftp://ftp.ncbi.nlm.nih.gov/genomes/all/GCF/900/992/065/GCF_900992065.1_7368_8_55
GCF_900992075.1	Y	MG_1	PRJNA224116	SAMEA1407095	F	na	Streptococcus pyogenes	Pyogenic	Streptococcus pyogenes	NS6185	Contig	2019/04/11	SC	ftp://ftp.ncbi.nlm.nih.gov/genomes/all/GCF/900/992/075/GCF_900992075.1_7368_8_56
GCF_900992085.1	Y	MG_1	PRJNA224116	SAMEA1407077	F	na	Streptococcus pyogenes	Pyogenic	Streptococcus pyogenes	NS6221	Contig	2019/04/11	SC	ftp://ftp.ncbi.nlm.nih.gov/genomes/all/GCF/900/992/085/GCF_900992085.1_7368_8_58
GCF_900992105.1	Y	MG_1	PRJNA224116	SAMEA1407063	F	na	Streptococcus pyogenes	Pyogenic	Streptococcus pyogenes	NS6263	Scaffold	2019/04/11	SC	ftp://ftp.ncbi.nlm.nih.gov/genomes/all/GCF/900/992/105/GCF_900992105.1_7368_8_59
GCF_900992125.1	Y	MG_1	PRJNA224116	SAMEA1406996	F	na	Streptococcus pyogenes	Pyogenic	Streptococcus pyogenes	NS6474	Contig	2019/04/11	SC	ftp://ftp.ncbi.nlm.nih.gov/genomes/all/GCF/900/992/125/GCF_900992125.1_7368_8_61
GCF_900992145.1	Y	MG_1	PRJNA224116	SAMEA1406949	F	na	Streptococcus pyogenes	Pyogenic	Streptococcus pyogenes	NS6595	Contig	2019/04/11	SC	ftp://ftp.ncbi.nlm.nih.gov/genomes/all/GCF/900/992/145/GCF_900992145.1_7368_8_64
GCF_900992155.1	Y	MG_1	PRJNA224116	SAMEA1407020	F	na	Streptococcus pyogenes	Pyogenic	Streptococcus pyogenes	NS6570	Scaffold	2019/04/11	SC	ftp://ftp.ncbi.nlm.nih.gov/genomes/all/GCF/900/992/155/GCF_900992155.1_7368_8_63
GCF_900992185.1	Y	MG_1	PRJNA224116	SAMEA1407067	F	na	Streptococcus pyogenes	Pyogenic	Streptococcus pyogenes	NS6845	Contig	2019/04/11	SC	ftp://ftp.ncbi.nlm.nih.gov/genomes/all/GCF/900/992/185/GCF_900992185.1_7368_8_69
GCF_900992205.1	Y	MG_1	PRJNA224116	SAMEA1406964	F	na	Streptococcus pyogenes	Pyogenic	Streptococcus pyogenes	NS6783	Contig	2019/04/11	SC	ftp://ftp.ncbi.nlm.nih.gov/genomes/all/GCF/900/992/205/GCF_900992205.1_7368_8_68
GCF_900992215.1	Y	MG_1	PRJNA224116	SAMEA1407059	F	na	Streptococcus pyogenes	Pyogenic	Streptococcus pyogenes	NS6930	Contig	2019/04/11	SC	ftp://ftp.ncbi.nlm.nih.gov/genomes/all/GCF/900/992/215/GCF_900992215.1_7368_8_70
GCF_900992255.1	Y	MG_1	PRJNA224116	SAMEA1407083	F	na	Streptococcus pyogenes	Pyogenic	Streptococcus pyogenes	NS7092	Contig	2019/04/11	SC	ftp://ftp.ncbi.nlm.nih.gov/genomes/all/GCF/900/992/255/GCF_900992255.1_7368_8_75
GCF_900992265.1	Y	MG_1	PRJNA224116	SAMEA1407093	F	na	Streptococcus pyogenes	Pyogenic	Streptococcus pyogenes	NS7056	Contig	2019/04/11	SC	ftp://ftp.ncbi.nlm.nih.gov/genomes/all/GCF/900/992/265/GCF_900992265.1_7368_8_74
GCF_900992295.1	Y	MG_1	PRJNA224116	SAMEA1406986	F	na	Streptococcus pyogenes	Pyogenic	Streptococcus pyogenes	NS7098	Contig	2019/04/11	SC	ftp://ftp.ncbi.nlm.nih.gov/genomes/all/GCF/900/992/295/GCF_900992295.1_7368_8_77
GCF_900992305.1	Y	MG_1	PRJNA224116	SAMEA1407026	F	na	Streptococcus pyogenes	Pyogenic	Streptococcus pyogenes	NS7133	Contig	2019/04/11	SC	ftp://ftp.ncbi.nlm.nih.gov/genomes/all/GCF/900/992/305/GCF_900992305.1_7368_8_79
GCF_900992325.1	Y	MG_1	PRJNA224116	SAMEA1407022	F	na	Streptococcus pyogenes	Pyogenic	Streptococcus pyogenes	NS7158	Contig	2019/04/11	SC	ftp://ftp.ncbi.nlm.nih.gov/genomes/all/GCF/900/992/325/GCF_900992325.1_7368_8_80
GCF_900992345.1	Y	MG_1	PRJNA224116	SAMEA1406992	F	na	Streptococcus pyogenes	Pyogenic	Streptococcus pyogenes	NS7168	Scaffold	2019/04/11	SC	ftp://ftp.ncbi.nlm.nih.gov/genomes/all/GCF/900/992/345/GCF_900992345.1_7368_8_82
GCF_900992355.1	Y	MG_1	PRJNA224116	SAMEA1407053	F	na	Streptococcus pyogenes	Pyogenic	Streptococcus pyogenes	NS7185	Scaffold	2019/04/11	SC	ftp://ftp.ncbi.nlm.nih.gov/genomes/all/GCF/900/992/355/GCF_900992355.1_7368_8_84
GCF_900992365.1	Y	MG_1	PRJNA224116	SAMEA1407081	F	na	Streptococcus pyogenes	Pyogenic	Streptococcus pyogenes	NS7970	Contig	2019/04/11	SC	ftp://ftp.ncbi.nlm.nih.gov/genomes/all/GCF/900/992/365/GCF_900992365.1_7368_8_87
GCF_900992405.1	Y	MG_1	PRJNA224116	SAMEA1407042	F	na	Streptococcus pyogenes	Pyogenic	Streptococcus pyogenes	NS7249	Contig	2019/04/14	SC	ftp://ftp.ncbi.nlm.nih.gov/genomes/all/GCF/900/992/405/GCF_900992405.1_7368_8_85
GCF_900992415.1	Y	MG_1	PRJNA224116	SAMEA1407112	F	na	Streptococcus pyogenes	Pyogenic	Streptococcus pyogenes	NS10015	Contig	2019/04/11	SC	ftp://ftp.ncbi.nlm.nih.gov/genomes/all/GCF/900/992/415/GCF_900992415.1_7368_8_90
GCF_900992625.1	Y	MG_1	PRJNA224116	SAMEA1324185	F	na	Streptococcus pyogenes	Pyogenic	Streptococcus pyogenes	33167V1T1	Contig	2019/04/11	SC	ftp://ftp.ncbi.nlm.nih.gov/genomes/all/GCF/900/992/625/GCF_900992625.1_7622_7_85
GCF_900992715.1	Y	MG_1	PRJNA224116	SAMEA1523564	F	na	Streptococcus pyogenes	Pyogenic	Streptococcus pyogenes	20033V1I1	Contig	2019/04/11	SC	ftp://ftp.ncbi.nlm.nih.gov/genomes/all/GCF/900/992/715/GCF_900992715.1_8113_6_11
GCF_900992915.1	Y	MG_1	PRJNA224116	SAMEA1523528	F	na	Streptococcus pyogenes	Pyogenic	Streptococcus pyogenes	20011V1S1	Contig	2019/04/11	SC	ftp://ftp.ncbi.nlm.nih.gov/genomes/all/GCF/900/992/915/GCF_900992915.1_8113_6_3
GCF_900992955.1	Y	MG_1	PRJNA224116	SAMEA1523489	F	na	Streptococcus pyogenes	Pyogenic	Streptococcus pyogenes	20110V1I1	Contig	2019/04/11	SC	ftp://ftp.ncbi.nlm.nih.gov/genomes/all/GCF/900/992/955/GCF_900992955.1_8113_6_34
GCF_900993015.1	Y	MG_1	PRJNA224116	SAMEA1523516	F	na	Streptococcus pyogenes	Pyogenic	Streptococcus pyogenes	20139V1I1	Contig	2019/04/11	SC	ftp://ftp.ncbi.nlm.nih.gov/genomes/all/GCF/900/993/015/GCF_900993015.1_8113_6_40
GCF_900993025.1	Y	MG_1	PRJNA224116	SAMEA1523480	F	na	Streptococcus pyogenes	Pyogenic	Streptococcus pyogenes	20148V1I1	Contig	2019/04/11	SC	ftp://ftp.ncbi.nlm.nih.gov/genomes/all/GCF/900/993/025/GCF_900993025.1_8113_6_41
GCF_900993095.1	Y	MG_1	PRJNA224116	SAMEA1523418	F	na	Streptococcus pyogenes	Pyogenic	Streptococcus pyogenes	20237V1I1	Contig	2019/04/11	SC	ftp://ftp.ncbi.nlm.nih.gov/genomes/all/GCF/900/993/095/GCF_900993095.1_8113_6_48
GCF_900993235.1	Y	MG_1	PRJNA224116	SAMEA1523473	F	na	Streptococcus pyogenes	Pyogenic	Streptococcus pyogenes	30239V1T1	Contig	2019/04/11	SC	ftp://ftp.ncbi.nlm.nih.gov/genomes/all/GCF/900/993/235/GCF_900993235.1_8113_6_61
GCF_900993295.1	Y	MG_1	PRJNA224116	SAMEA1523440	F	na	Streptococcus pyogenes	Pyogenic	Streptococcus pyogenes	HKU464	Contig	2019/04/11	SC	ftp://ftp.ncbi.nlm.nih.gov/genomes/all/GCF/900/993/295/GCF_900993295.1_8113_6_74
GCF_900993565.1	Y	MG_1	PRJNA224116	SAMEA3919000	F	na	Streptococcus pyogenes	Pyogenic	Streptococcus pyogenes	GAS131487	Contig	2019/04/11	SC	ftp://ftp.ncbi.nlm.nih.gov/genomes/all/GCF/900/993/565/GCF_900993565.1_19944_7_97
GCF_900993575.1	Y	MG_1	PRJNA224116	SAMEA3918998	F	na	Streptococcus pyogenes	Pyogenic	Streptococcus pyogenes	GAS131166	Scaffold	2019/04/11	SC	ftp://ftp.ncbi.nlm.nih.gov/genomes/all/GCF/900/993/575/GCF_900993575.1_19944_7_99
GCF_900993585.1	Y	MG_1	PRJNA224116	SAMEA3918919	F	na	Streptococcus pyogenes	Pyogenic	Streptococcus pyogenes	GAS11493	Contig	2019/04/11	SC	ftp://ftp.ncbi.nlm.nih.gov/genomes/all/GCF/900/993/585/GCF_900993585.1_19944_8_1
GCF_900993675.1	Y	MG_1	PRJNA224116	SAMEA3918862	F	na	Streptococcus pyogenes	Pyogenic	Streptococcus pyogenes	GAS05161	Contig	2019/04/11	SC	ftp://ftp.ncbi.nlm.nih.gov/genomes/all/GCF/900/993/675/GCF_900993675.1_19944_8_106
GCF_900993785.1	Y	MG_1	PRJNA224116	SAMEA3918843	F	na	Streptococcus pyogenes	Pyogenic	Streptococcus pyogenes	GAS10197	Contig	2019/04/11	SC	ftp://ftp.ncbi.nlm.nih.gov/genomes/all/GCF/900/993/785/GCF_900993785.1_19944_8_117
GCF_900993795.1	Y	MG_1	PRJNA224116	SAMEA3918841	F	na	Streptococcus pyogenes	Pyogenic	Streptococcus pyogenes	GAS1047	Scaffold	2019/04/11	SC	ftp://ftp.ncbi.nlm.nih.gov/genomes/all/GCF/900/993/795/GCF_900993795.1_19944_8_118
GCF_900993815.1	Y	MG_1	PRJNA224116	SAMEA3918839	F	na	Streptococcus pyogenes	Pyogenic	Streptococcus pyogenes	GAS09344	Scaffold	2019/04/11	SC	ftp://ftp.ncbi.nlm.nih.gov/genomes/all/GCF/900/993/815/GCF_900993815.1_19944_8_119
GCF_900993835.1	Y	MG_1	PRJNA224116	SAMEA3918836	F	na	Streptococcus pyogenes	Pyogenic	Streptococcus pyogenes	GAS06308	Contig	2019/04/11	SC	ftp://ftp.ncbi.nlm.nih.gov/genomes/all/GCF/900/993/835/GCF_900993835.1_19944_8_121
GCF_900993855.1	Y	MG_1	PRJNA224116	SAMEA3918834	F	na	Streptococcus pyogenes	Pyogenic	Streptococcus pyogenes	GAS05151	Scaffold	2019/04/11	SC	ftp://ftp.ncbi.nlm.nih.gov/genomes/all/GCF/900/993/855/GCF_900993855.1_19944_8_122
GCF_900994015.1	Y	MG_1	PRJNA224116	SAMEA3918803	F	na	Streptococcus pyogenes	Pyogenic	Streptococcus pyogenes	GAS10325	Scaffold	2019/04/11	SC	ftp://ftp.ncbi.nlm.nih.gov/genomes/all/GCF/900/994/015/GCF_900994015.1_19944_8_140
GCF_900994025.1	Y	MG_1	PRJNA224116	SAMEA3918906	F	na	Streptococcus pyogenes	Pyogenic	Streptococcus pyogenes	GAS12332	Contig	2019/04/11	SC	ftp://ftp.ncbi.nlm.nih.gov/genomes/all/GCF/900/994/025/GCF_900994025.1_19944_8_14
GCF_900994205.1	Y	MG_1	PRJNA224116	SAMEA3918777	F	na	Streptococcus pyogenes	Pyogenic	Streptococcus pyogenes	GAS10262	Contig	2019/04/11	SC	ftp://ftp.ncbi.nlm.nih.gov/genomes/all/GCF/900/994/205/GCF_900994205.1_19944_8_156
GCF_900994285.1	Y	MG_1	PRJNA224116	SAMEA3918769	F	na	Streptococcus pyogenes	Pyogenic	Streptococcus pyogenes	GAS10250	Contig	2019/04/11	SC	ftp://ftp.ncbi.nlm.nih.gov/genomes/all/GCF/900/994/285/GCF_900994285.1_19944_8_164
GCF_900994595.1	Y	MG_1	PRJNA224116	SAMEA3918877	F	na	Streptococcus pyogenes	Pyogenic	Streptococcus pyogenes	GAS12314	Scaffold	2019/04/11	SC	ftp://ftp.ncbi.nlm.nih.gov/genomes/all/GCF/900/994/595/GCF_900994595.1_19944_8_30
GCF_900994675.1	Y	MG_1	PRJNA224116	SAMEA3918851	F	na	Streptococcus pyogenes	Pyogenic	Streptococcus pyogenes	GAS1224	Contig	2019/04/11	SC	ftp://ftp.ncbi.nlm.nih.gov/genomes/all/GCF/900/994/675/GCF_900994675.1_19944_8_40
GCF_900994845.1	Y	MG_1	PRJNA224116	SAMEA3918823	F	na	Streptococcus pyogenes	Pyogenic	Streptococcus pyogenes	GAS12484	Contig	2019/04/11	SC	ftp://ftp.ncbi.nlm.nih.gov/genomes/all/GCF/900/994/845/GCF_900994845.1_19944_8_53
GCF_900994945.1	Y	MG_1	PRJNA224116	SAMEA3918792	F	na	Streptococcus pyogenes	Pyogenic	Streptococcus pyogenes	GAS11353	Contig	2019/04/11	SC	ftp://ftp.ncbi.nlm.nih.gov/genomes/all/GCF/900/994/945/GCF_900994945.1_19944_8_65
GCF_900995125.1	Y	MG_1	PRJNA224116	SAMEA3918747	F	na	Streptococcus pyogenes	Pyogenic	Streptococcus pyogenes	GAS12139	Scaffold	2019/04/11	SC	ftp://ftp.ncbi.nlm.nih.gov/genomes/all/GCF/900/995/125/GCF_900995125.1_19944_8_79
GCF_900995265.1	Y	MG_1	PRJNA224116	SAMEA3918885	F	na	Streptococcus pyogenes	Pyogenic	Streptococcus pyogenes	GAS10417	Contig	2019/04/11	SC	ftp://ftp.ncbi.nlm.nih.gov/genomes/all/GCF/900/995/265/GCF_900995265.1_19944_8_92
GCF_900995455.1	Y	MG_1	PRJNA224116	SAMEA864215	F	na	Streptococcus pyogenes	Pyogenic	Streptococcus pyogenes	NS101	Contig	2019/04/11	SC	ftp://ftp.ncbi.nlm.nih.gov/genomes/all/GCF/900/995/455/GCF_900995455.1_5386_1_1
GCF_900995475.1	Y	MG_1	PRJNA224116	SAMEA864218	F	na	Streptococcus pyogenes	Pyogenic	Streptococcus pyogenes	NS1210	Contig	2019/04/11	SC	ftp://ftp.ncbi.nlm.nih.gov/genomes/all/GCF/900/995/475/GCF_900995475.1_5386_1_4
GCF_900995505.1	Y	MG_1	PRJNA224116	SAMEA864273	F	na	Streptococcus pyogenes	Pyogenic	Streptococcus pyogenes	NS192	Contig	2019/04/11	SC	ftp://ftp.ncbi.nlm.nih.gov/genomes/all/GCF/900/995/505/GCF_900995505.1_5386_1_6
GCF_900995515.1	Y	MG_1	PRJNA224116	SAMEA3918876	F	na	Streptococcus pyogenes	Pyogenic	Streptococcus pyogenes	GAS07174	Contig	2019/04/11	SC	ftp://ftp.ncbi.nlm.nih.gov/genomes/all/GCF/900/995/515/GCF_900995515.1_19944_8_97
GCF_900995535.1	Y	MG_1	PRJNA224116	SAMEA864255	F	na	Streptococcus pyogenes	Pyogenic	Streptococcus pyogenes	NS1132	Contig	2019/04/11	SC	ftp://ftp.ncbi.nlm.nih.gov/genomes/all/GCF/900/995/535/GCF_900995535.1_5731_5_10
GCF_900995565.1	Y	MG_1	PRJNA224116	SAMEA864274	F	na	Streptococcus pyogenes	Pyogenic	Streptococcus pyogenes	NS216	Contig	2019/04/11	SC	ftp://ftp.ncbi.nlm.nih.gov/genomes/all/GCF/900/995/565/GCF_900995565.1_5386_1_9
GCF_900995585.1	Y	MG_1	PRJNA224116	SAMEA864319	F	na	Streptococcus pyogenes	Pyogenic	Streptococcus pyogenes	NS1133	Scaffold	2019/04/11	SC	ftp://ftp.ncbi.nlm.nih.gov/genomes/all/GCF/900/995/585/GCF_900995585.1_5731_5_11
GCF_900995595.1	Y	MG_1	PRJNA224116	SAMEA864256	F	na	Streptococcus pyogenes	Pyogenic	Streptococcus pyogenes	NS10	Contig	2019/04/11	SC	ftp://ftp.ncbi.nlm.nih.gov/genomes/all/GCF/900/995/595/GCF_900995595.1_5731_5_2
GCF_900995615.1	Y	MG_1	PRJNA224116	SAMEA864320	F	na	Streptococcus pyogenes	Pyogenic	Streptococcus pyogenes	NS1140	Contig	2019/04/11	SC	ftp://ftp.ncbi.nlm.nih.gov/genomes/all/GCF/900/995/615/GCF_900995615.1_5731_5_12
GCF_900995645.1	Y	MG_1	PRJNA224116	SAMEA864252	F	na	Streptococcus pyogenes	Pyogenic	Streptococcus pyogenes	NS1053	Contig	2019/04/11	SC	ftp://ftp.ncbi.nlm.nih.gov/genomes/all/GCF/900/995/645/GCF_900995645.1_5731_5_5
GCF_900995675.1	Y	MG_1	PRJNA224116	SAMEA864250	F	na	Streptococcus pyogenes	Pyogenic	Streptococcus pyogenes	NS1107	Contig	2019/04/11	SC	ftp://ftp.ncbi.nlm.nih.gov/genomes/all/GCF/900/995/675/GCF_900995675.1_5731_5_7
GCF_900995705.1	Y	MG_1	PRJNA224116	SAMEA864318	F	na	Streptococcus pyogenes	Pyogenic	Streptococcus pyogenes	NS1216	Contig	2019/04/11	SC	ftp://ftp.ncbi.nlm.nih.gov/genomes/all/GCF/900/995/705/GCF_900995705.1_5731_6_2
GCF_900995715.1	Y	MG_1	PRJNA224116	SAMEA864291	F	na	Streptococcus pyogenes	Pyogenic	Streptococcus pyogenes	NS210	Contig	2019/04/11	SC	ftp://ftp.ncbi.nlm.nih.gov/genomes/all/GCF/900/995/715/GCF_900995715.1_5731_6_12
GCF_900995745.1	Y	MG_1	PRJNA224116	SAMEA864258	F	na	Streptococcus pyogenes	Pyogenic	Streptococcus pyogenes	NS14	Contig	2019/04/11	SC	ftp://ftp.ncbi.nlm.nih.gov/genomes/all/GCF/900/995/745/GCF_900995745.1_5731_6_5
GCF_900995775.1	Y	MG_1	PRJNA224116	SAMEA864294	F	na	Streptococcus pyogenes	Pyogenic	Streptococcus pyogenes	NS190	Contig	2019/04/11	SC	ftp://ftp.ncbi.nlm.nih.gov/genomes/all/GCF/900/995/775/GCF_900995775.1_5731_6_9
GCF_900995825.1	Y	MG_1	PRJNA224116	SAMEA864292	F	na	Streptococcus pyogenes	Pyogenic	Streptococcus pyogenes	NS226	Scaffold	2019/04/11	SC	ftp://ftp.ncbi.nlm.nih.gov/genomes/all/GCF/900/995/825/GCF_900995825.1_5731_7_3
GCF_900995845.1	Y	MG_1	PRJNA224116	SAMEA864298	F	na	Streptococcus pyogenes	Pyogenic	Streptococcus pyogenes	NS235	Scaffold	2019/04/11	SC	ftp://ftp.ncbi.nlm.nih.gov/genomes/all/GCF/900/995/845/GCF_900995845.1_5731_7_4
GCF_900995965.1	Y	MG_1	PRJNA224116	SAMEA864230	F	na	Streptococcus pyogenes	Pyogenic	Streptococcus pyogenes	NS506	Contig	2019/04/11	SC	ftp://ftp.ncbi.nlm.nih.gov/genomes/all/GCF/900/995/965/GCF_900995965.1_5749_2_5
GCF_900995975.1	Y	MG_1	PRJNA224116	SAMEA864265	F	na	Streptococcus pyogenes	Pyogenic	Streptococcus pyogenes	NS671	Contig	2019/04/11	SC	ftp://ftp.ncbi.nlm.nih.gov/genomes/all/GCF/900/995/975/GCF_900995975.1_5749_3_2
GCF_900995985.1	Y	MG_1	PRJNA224116	SAMEA864241	F	na	Streptococcus pyogenes	Pyogenic	Streptococcus pyogenes	NS534	Contig	2019/04/11	SC	ftp://ftp.ncbi.nlm.nih.gov/genomes/all/GCF/900/995/985/GCF_900995985.1_5749_2_7
GCF_900996055.1	Y	MG_1	PRJNA224116	SAMEA864247	F	na	Streptococcus pyogenes	Pyogenic	Streptococcus pyogenes	NS567	Contig	2019/04/11	SC	ftp://ftp.ncbi.nlm.nih.gov/genomes/all/GCF/900/996/055/GCF_900996055.1_5749_2_9
GCF_900996085.1	Y	MG_1	PRJNA224116	SAMEA864267	F	na	Streptococcus pyogenes	Pyogenic	Streptococcus pyogenes	NS684	Contig	2019/04/11	SC	ftp://ftp.ncbi.nlm.nih.gov/genomes/all/GCF/900/996/085/GCF_900996085.1_5749_3_4
GCF_900996155.1	Y	MG_1	PRJNA224116	SAMEA864285	F	na	Streptococcus pyogenes	Pyogenic	Streptococcus pyogenes	NS833	Contig	2019/04/11	SC	ftp://ftp.ncbi.nlm.nih.gov/genomes/all/GCF/900/996/155/GCF_900996155.1_5749_5_3
GCF_000390225.1	Y	MG_1	PRJNA224116	SAMN02470879	F	na	Streptococcus pyogenes	Pyogenic	Streptococcus pyogenes 06BA18369	06BA18369	Contig	2013/05/10	Northern Antibiotic Resistance Partnership	ftp://ftp.ncbi.nlm.nih.gov/genomes/all/GCF/000/390/225/GCF_000390225.1_GAS1.0
GCF_000631925.1	Y	MG_1	PRJNA224116	SAMN02567325	F	na	Streptococcus pyogenes	Pyogenic	Streptococcus pyogenes ABC020047506	ABC020047506	Scaffold	2014/04/14	Broad Institute	ftp://ftp.ncbi.nlm.nih.gov/genomes/all/GCF/000/631/925/GCF_000631925.1_Stre_pyog_ABC020047506_V1
GCF_000630465.1	Y	MG_1	PRJNA224116	SAMN02567520	F	na	Streptococcus pyogenes	Pyogenic	Streptococcus pyogenes ABC020047993	ABC020047993	Scaffold	2014/04/14	Broad Institute	ftp://ftp.ncbi.nlm.nih.gov/genomes/all/GCF/000/630/465/GCF_000630465.1_Stre_pyog_ABC020047993_V1
GCF_000631345.1	Y	MG_1	PRJNA224116	SAMN02567411	F	na	Streptococcus pyogenes	Pyogenic	Streptococcus pyogenes ABC020048885	ABC020048885	Scaffold	2014/04/14	Broad Institute	ftp://ftp.ncbi.nlm.nih.gov/genomes/all/GCF/000/631/345/GCF_000631345.1_Stre_pyog_ABC020048885_V1
GCF_000628525.1	Y	MG_1	PRJNA224116	SAMN02567529	F	na	Streptococcus pyogenes	Pyogenic	Streptococcus pyogenes ABC020050818	ABC020050818	Contig	2014/04/14	Broad Institute	ftp://ftp.ncbi.nlm.nih.gov/genomes/all/GCF/000/628/525/GCF_000628525.1_Stre_pyog_ABC020050818_V1
GCF_000230295.1	Y	MG_1	PRJNA224116	SAMN02603353	F	na	Streptococcus pyogenes	Pyogenic	Streptococcus pyogenes Alab49	Alab49	Complete	2011/10/07	Institute for Genome Sciences	ftp://ftp.ncbi.nlm.nih.gov/genomes/all/GCF/000/230/295/GCF_000230295.1_ASM23029v1
GCF_000146715.1	Y	MG_1	PRJNA224116	SAMN00189880	F	na	Streptococcus pyogenes	Pyogenic	Streptococcus pyogenes ATCC 10782	ATCC 10782	Scaffold	2010/09/03	Baylor College of Medicine	ftp://ftp.ncbi.nlm.nih.gov/genomes/all/GCF/000/146/715/GCF_000146715.1_ASM14671v1
GCF_000483625.1	Y	MG_1	PRJNA224116	SAMN02436404	F	na	Streptococcus pyogenes	Pyogenic	Streptococcus pyogenes GA03805	GA03805	Contig	2013/10/25	J. Craig Venter Institute	ftp://ftp.ncbi.nlm.nih.gov/genomes/all/GCF/000/483/625/GCF_000483625.1_SpyogGA03805v1.0
GCF_000483525.1	Y	MG_1	PRJNA224116	SAMN02436481	F	na	Streptococcus pyogenes	Pyogenic	Streptococcus pyogenes GA19700	GA19700	Contig	2013/10/25	J. Craig Venter Institute	ftp://ftp.ncbi.nlm.nih.gov/genomes/all/GCF/000/483/525/GCF_000483525.1_SpyogGA19700v1.0
GCF_000499245.1	Y	MG_1	PRJNA224116	SAMN02436405	F	na	Streptococcus pyogenes	Pyogenic	Streptococcus pyogenes GA40884	GA40884	Contig	2013/11/25	J. Craig Venter Institute	ftp://ftp.ncbi.nlm.nih.gov/genomes/all/GCF/000/499/245/GCF_000499245.1_SpyogGA40884v1.0
GCF_000483585.1	Y	MG_1	PRJNA224116	SAMN02436480	F	na	Streptococcus pyogenes	Pyogenic	Streptococcus pyogenes GA41394	GA41394	Contig	2013/10/25	J. Craig Venter Institute	ftp://ftp.ncbi.nlm.nih.gov/genomes/all/GCF/000/483/585/GCF_000483585.1_SpyogGA41394v1.0
GCF_000275625.1	Y	MG_1	PRJNA224116	SAMN02471172	F	na	Streptococcus pyogenes	Pyogenic	Streptococcus pyogenes HKU QMH11M0907901	HKU QMH11M0907901	Chromosome	2012/05/18	Department of Microbiology, The University of Hong Kong	ftp://ftp.ncbi.nlm.nih.gov/genomes/all/GCF/000/275/625/GCF_000275625.1_ASM27562v1
GCF_000422045.1	Y	MG_1	PRJNA224116	SAMN02604317	F	na	Streptococcus pyogenes	Pyogenic	Streptococcus pyogenes HSC5	HSC5	Complete	2013/07/11	Washington University in St Louis	ftp://ftp.ncbi.nlm.nih.gov/genomes/all/GCF/000/422/045/GCF_000422045.1_ASM42204v1
GCF_001014285.1	Y	MG_1	PRJNA224116	SAMN03610013	F	na	Streptococcus pyogenes	Pyogenic	Streptococcus pyogenes JRS4	JRS4	Complete	2015/05/28	Washington University School of Medicine	ftp://ftp.ncbi.nlm.nih.gov/genomes/all/GCF/001/014/285/GCF_001014285.1_ASM101428v1
GCF_000006785.2	Y	MG_1	PRJNA57845	SAMN02604089	F	reference genome	Streptococcus pyogenes	Pyogenic	Streptococcus pyogenes M1 GAS	SF370	Complete	2014/04/01	Univ. Oklahoma	ftp://ftp.ncbi.nlm.nih.gov/genomes/all/GCF/000/006/785/GCF_000006785.2_ASM678v2
GCF_000013505.1	Y	MG_1	PRJNA224116	SAMN02603502	F	na	Streptococcus pyogenes	Pyogenic	Streptococcus pyogenes MGAS10270	MGAS10270	Complete	2006/05/04	Lab of Human Bacterial Pathogenesis	ftp://ftp.ncbi.nlm.nih.gov/genomes/all/GCF/000/013/505/GCF_000013505.1_ASM1350v1
GCF_000011665.1	Y	MG_1	PRJNA224116	SAMN02603497	F	na	Streptococcus pyogenes	Pyogenic	Streptococcus pyogenes MGAS10394	MGAS10394	Complete	2004/08/03	Lab of Human Bacterial Pathogenesis	ftp://ftp.ncbi.nlm.nih.gov/genomes/all/GCF/000/011/665/GCF_000011665.1_ASM1166v1
GCF_000013545.1	Y	MG_1	PRJNA224116	SAMN02603504	F	na	Streptococcus pyogenes	Pyogenic	Streptococcus pyogenes MGAS10750	MGAS10750	Complete	2006/05/04	Lab of Human Bacterial Pathogenesis	ftp://ftp.ncbi.nlm.nih.gov/genomes/all/GCF/000/013/545/GCF_000013545.1_ASM1354v1
GCF_000250905.1	Y	MG_1	PRJNA224116	SAMN02603944	F	na	Streptococcus pyogenes	Pyogenic	Streptococcus pyogenes MGAS15252	MGAS15252	Complete	2012/03/01	The Methodist Hospital Research Institute	ftp://ftp.ncbi.nlm.nih.gov/genomes/all/GCF/000/250/905/GCF_000250905.1_ASM25090v1
GCF_000013525.1	Y	MG_1	PRJNA224116	SAMN02603503	F	na	Streptococcus pyogenes	Pyogenic	Streptococcus pyogenes MGAS2096	MGAS2096	Complete	2006/05/04	Lab of Human Bacterial Pathogenesis	ftp://ftp.ncbi.nlm.nih.gov/genomes/all/GCF/000/013/525/GCF_000013525.1_ASM1352v1
GCF_000007425.1	Y	MG_1	PRJNA224116	SAMN02603496	F	na	Streptococcus pyogenes	Pyogenic	Streptococcus pyogenes MGAS315	MGAS315	Complete	2002/07/18	Lab of Human Bacterial Pathogenesis	ftp://ftp.ncbi.nlm.nih.gov/genomes/all/GCF/000/007/425/GCF_000007425.1_ASM742v1
GCF_000011765.3	Y	MG_1	PRJNA224116	SAMN02603500	F	na	Streptococcus pyogenes	Pyogenic	Streptococcus pyogenes MGAS5005	MGAS5005	Complete	2014/04/01	Lab of Human Bacterial Pathogenesis	ftp://ftp.ncbi.nlm.nih.gov/genomes/all/GCF/000/011/765/GCF_000011765.3_ASM1176v2
GCF_000012165.2	Y	MG_1	PRJNA224116	SAMN02603499	F	na	Streptococcus pyogenes	Pyogenic	Streptococcus pyogenes MGAS6180	MGAS6180	Complete	2019/02/12	Lab of Human Bacterial Pathogenesis	ftp://ftp.ncbi.nlm.nih.gov/genomes/all/GCF/000/012/165/GCF_000012165.2_ASM1216v2
GCF_000007285.1	Y	MG_1	PRJNA224116	SAMN02603495	F	na	Streptococcus pyogenes	Pyogenic	Streptococcus pyogenes MGAS8232	MGAS8232	Complete	2002/04/03	Lab of Human Bacterial Pathogenesis	ftp://ftp.ncbi.nlm.nih.gov/genomes/all/GCF/000/007/285/GCF_000007285.1_ASM728v1
GCF_000013485.1	Y	MG_1	PRJNA224116	SAMN02603501	F	na	Streptococcus pyogenes	Pyogenic	Streptococcus pyogenes MGAS9429	MGAS9429	Complete	2006/05/04	Lab of Human Bacterial Pathogenesis	ftp://ftp.ncbi.nlm.nih.gov/genomes/all/GCF/000/013/485/GCF_000013485.1_ASM1348v1
GCF_000018125.1	Y	MG_1	PRJNA224116	SAMN02604236	F	na	Streptococcus pyogenes	Pyogenic	Streptococcus pyogenes NZ131	NZ131; ATCC BAA-1633	Complete	2008/10/16	University of Oklahoma Health Sciences Center	ftp://ftp.ncbi.nlm.nih.gov/genomes/all/GCF/000/018/125/GCF_000018125.1_ASM1812v1
GCF_000648895.1	Y	MG_1	PRJNA224116	SAMN02741846	F	na	Streptococcus pyogenes	Pyogenic	Streptococcus pyogenes SP10-LAU	SP10-LAU	Contig	2014/04/28	Lebanese American University	ftp://ftp.ncbi.nlm.nih.gov/genomes/all/GCF/000/648/895/GCF_000648895.1_Draft_SP10-LAU_Genome
GCF_000648715.1	Y	MG_1	PRJNA224116	SAMN02741845	F	na	Streptococcus pyogenes	Pyogenic	Streptococcus pyogenes SP8-LAU	SP8-LAU	Contig	2014/04/28	Lebanese American University	ftp://ftp.ncbi.nlm.nih.gov/genomes/all/GCF/000/648/715/GCF_000648715.1_Draft_SP8-LAU_Genome
GCF_000758085.1	Y	MG_1	PRJNA224116	SAMN00000654	F	na	Streptococcus pyogenes	Pyogenic	Streptococcus pyogenes SS1447	SS1447	Contig	2014/09/25	University of Maryland IGS	ftp://ftp.ncbi.nlm.nih.gov/genomes/all/GCF/000/758/085/GCF_000758085.1_ASM75808v1
GCF_000732345.1	Y	MG_1	PRJNA224116	SAMN03081522	F	na	Streptococcus pyogenes	Pyogenic	Streptococcus pyogenes STAB1102	STAB1102	Chromosome	2014/07/22	Service Bacteriologie CHU Pontchaillou	ftp://ftp.ncbi.nlm.nih.gov/genomes/all/GCF/000/732/345/GCF_000732345.1_ASM73234v1
GCF_000009385.1	Y	MG_1	PRJNA224116	SAMEA1705956	F	na	Streptococcus pyogenes	Pyogenic	Streptococcus pyogenes str. Manfredo	Manfredo	Complete	2007/03/29	Sanger Institute	ftp://ftp.ncbi.nlm.nih.gov/genomes/all/GCF/000/009/385/GCF_000009385.1_ASM938v1
GCF_000454105.1	Y	MG_1	PRJNA224116	SAMN00828757	F	na	Streptococcus pyogenes	Pyogenic	Streptococcus pyogenes UTMEM-1	UTMEM-1	Contig	2013/08/22	J. Craig Venter Institute	ftp://ftp.ncbi.nlm.nih.gov/genomes/all/GCF/000/454/105/GCF_000454105.1_SpyogUTMEM-1v1.0
GCF_000425025.1	Y	MG_10	PRJNA224116	SAMN02441486	F	na	Streptococcus castoreus	Pyogenic	Streptococcus castoreus DSM 17536	DSM 17536	Scaffold	2013/07/11	DOE Joint Genome Institute	ftp://ftp.ncbi.nlm.nih.gov/genomes/all/GCF/000/425/025/GCF_000425025.1_ASM42502v1
GCF_003942915.1	Y	MG_100	PRJNA224116	SAMN09631732	F	na	Streptococcus oralis subsp. dentisani	Mitis	Streptococcus mitis	BCC40	Contig	2018/12/12	Clemson University	ftp://ftp.ncbi.nlm.nih.gov/genomes/all/GCF/003/942/915/GCF_003942915.1_ASM394291v1
GCF_000221165.1	Y	MG_100	PRJNA224116	SAMN02415617	F	na	Streptococcus oralis subsp. dentisani	Mitis	Streptococcus mitis bv. 2 str. F0392	F0392	Contig	2011/07/21	J. Craig Venter Institute	ftp://ftp.ncbi.nlm.nih.gov/genomes/all/GCF/000/221/165/GCF_000221165.1_ASM22116v2
GCF_003674235.1	Y	MG_101	PRJNA224116	SAMN09104534	F	na	Streptococcus iniae	Pyogenic	Streptococcus iniae	QMA0468	Scaffold	2018/10/23	The University of Queensland	ftp://ftp.ncbi.nlm.nih.gov/genomes/all/GCF/003/674/235/GCF_003674235.1_ASM367423v1
GCF_003674345.1	Y	MG_101	PRJNA224116	SAMN09104524	F	na	Streptococcus iniae	Pyogenic	Streptococcus iniae	QMA0445	Contig	2018/10/23	The University of Queensland	ftp://ftp.ncbi.nlm.nih.gov/genomes/all/GCF/003/674/345/GCF_003674345.1_ASM367434v1
GCF_003674385.1	Y	MG_101	PRJNA224116	SAMN09104521	F	na	Streptococcus iniae	Pyogenic	Streptococcus iniae	QMA0371	Scaffold	2018/10/23	The University of Queensland	ftp://ftp.ncbi.nlm.nih.gov/genomes/all/GCF/003/674/385/GCF_003674385.1_ASM367438v1
GCF_003674705.1	Y	MG_101	PRJNA224116	SAMN09104506	F	na	Streptococcus iniae	Pyogenic	Streptococcus iniae	QMA0234	Scaffold	2018/10/23	The University of Queensland	ftp://ftp.ncbi.nlm.nih.gov/genomes/all/GCF/003/674/705/GCF_003674705.1_ASM367470v1
GCF_003674865.1	Y	MG_101	PRJNA224116	SAMN09104497	F	na	Streptococcus iniae	Pyogenic	Streptococcus iniae	QMA0190	Scaffold	2018/10/23	The University of Queensland	ftp://ftp.ncbi.nlm.nih.gov/genomes/all/GCF/003/674/865/GCF_003674865.1_ASM367486v1
GCF_003674925.1	Y	MG_101	PRJNA224116	SAMN09104495	F	na	Streptococcus iniae	Pyogenic	Streptococcus iniae	QMA0188	Scaffold	2018/10/23	The University of Queensland	ftp://ftp.ncbi.nlm.nih.gov/genomes/all/GCF/003/674/925/GCF_003674925.1_ASM367492v1
GCF_003674935.1	Y	MG_101	PRJNA224116	SAMN09104494	F	na	Streptococcus iniae	Pyogenic	Streptococcus iniae	QMA0187	Contig	2018/10/23	The University of Queensland	ftp://ftp.ncbi.nlm.nih.gov/genomes/all/GCF/003/674/935/GCF_003674935.1_ASM367493v1
GCF_003675085.1	Y	MG_101	PRJNA224116	SAMN09104477	F	na	Streptococcus iniae	Pyogenic	Streptococcus iniae	QMA0141	Contig	2018/10/23	The University of Queensland	ftp://ftp.ncbi.nlm.nih.gov/genomes/all/GCF/003/675/085/GCF_003675085.1_ASM367508v1
GCF_003697605.1	Y	MG_101	PRJNA224116	SAMN09104476	F	na	Streptococcus iniae	Pyogenic	Streptococcus iniae	QMA0140	Contig	2018/10/30	The University of Queensland	ftp://ftp.ncbi.nlm.nih.gov/genomes/all/GCF/003/697/605/GCF_003697605.1_ASM369760v1
GCF_003697625.1	Y	MG_101	PRJNA224116	SAMN09104475	F	na	Streptococcus iniae	Pyogenic	Streptococcus iniae	QMA0139	Scaffold	2018/10/30	The University of Queensland	ftp://ftp.ncbi.nlm.nih.gov/genomes/all/GCF/003/697/625/GCF_003697625.1_ASM369762v1
GCF_000300915.1	Y	MG_101	PRJNA224116	SAMN00000311	F	na	Streptococcus iniae	Pyogenic	Streptococcus iniae 9117	9117	Scaffold	2012/10/02	Baylor College of Medicine	ftp://ftp.ncbi.nlm.nih.gov/genomes/all/GCF/000/300/915/GCF_000300915.1_ASM30091v1
GCF_000331915.1	Y	MG_101	PRJNA224116	SAMN02471473	F	na	Streptococcus iniae	Pyogenic	Streptococcus iniae IUSA1	IUSA1	Contig	2013/02/20	Veterinary Faculty:University Institute of Animal Health	ftp://ftp.ncbi.nlm.nih.gov/genomes/all/GCF/000/331/915/GCF_000331915.1_ASM33191v2
GCF_900459365.1	Y	MG_102	PRJNA224116	SAMEA3905381	F	na	Streptococcus massiliensis	-	Streptococcus massiliensis	NCTC13765	Contig	2018/08/01	SC	ftp://ftp.ncbi.nlm.nih.gov/genomes/all/GCF/900/459/365/GCF_900459365.1_45296_H02
GCF_000187585.1	Y	MG_103	PRJNA224116	SAMN00253298	F	na	Streptococcus peroris	Mitis	Streptococcus peroris ATCC 700780	ATCC 700780	Scaffold	2011/02/03	Baylor College of Medicine	ftp://ftp.ncbi.nlm.nih.gov/genomes/all/GCF/000/187/585/GCF_000187585.1_ASM18758v1
GCF_001839505.1	Y	MG_103	PRJNA224116	SAMN04498864	F	na	Streptococcus sp.	Mitis	Streptococcus sp. HMSC34B10	HMSC34B10	Scaffold	2016/10/25	The Genome Institute at Washington University	ftp://ftp.ncbi.nlm.nih.gov/genomes/all/GCF/001/839/505/GCF_001839505.1_ASM183950v1
GCF_003942965.1	Y	MG_104	PRJNA224116	SAMN09631729	F	na	Streptococcus mitis	Mitis	Streptococcus mitis	BCC07	Contig	2018/12/12	Clemson University	ftp://ftp.ncbi.nlm.nih.gov/genomes/all/GCF/003/942/965/GCF_003942965.1_ASM394296v1
GCF_001078705.1	Y	MG_105	PRJNA224116	SAMEA3207422	F	na	Streptococcus sanguinis	Mitis	Streptococcus sanguinis	2908	Scaffold	2015/07/09	IMPERIAL COLLEGE LONDON	ftp://ftp.ncbi.nlm.nih.gov/genomes/all/GCF/001/078/705/GCF_001078705.1_Streptococcus_sanguinis_2908
GCF_000380145.1	Y	MG_106	PRJNA224116	SAMN02256409	F	na	Streptococcus thoraltensis	-	Streptococcus thoraltensis DSM 12221	DSM 12221	Scaffold	2013/04/23	DOE Joint Genome Institute	ftp://ftp.ncbi.nlm.nih.gov/genomes/all/GCF/000/380/145/GCF_000380145.1_ASM38014v1
GCF_900475025.1	Y	MG_107	PRJNA224116	SAMEA3572443	F	na	Streptococcus ferus	Mutans	Streptococcus ferus	NCTC12278	Complete	2018/06/17	SC	ftp://ftp.ncbi.nlm.nih.gov/genomes/all/GCF/900/475/025/GCF_900475025.1_41906_G01
GCF_001708305.1	Y	MG_108	PRJNA224116	SAMN05560386	F	representative genome	Streptococcus himalayensis	-	Streptococcus himalayensis	HTS2	Complete	2016/08/23	National Institute for Communicable Disease Control and Prevention, China CDC	ftp://ftp.ncbi.nlm.nih.gov/genomes/all/GCF/001/708/305/GCF_001708305.1_ASM170830v1
GCF_001579025.1	Y	MG_109	PRJNA224116	SAMN04325058	F	na	Streptococcus oralis	Mitis	Streptococcus oralis	DD27	Scaffold	2016/03/02	University of Kaiserslautern	ftp://ftp.ncbi.nlm.nih.gov/genomes/all/GCF/001/579/025/GCF_001579025.1_ASM157902v1
GCF_000937075.1	Y	MG_11	PRJNA224116	SAMEA3233985	F	na	Streptococcus suis	Suis	Streptococcus suis	S11L	Contig	2015/02/18	UNIVERSITY OF CAMBRIDGE	ftp://ftp.ncbi.nlm.nih.gov/genomes/all/GCF/000/937/075/GCF_000937075.1_Velvet_assembly
GCF_000938795.1	Y	MG_11	PRJNA224116	SAMEA3233997	F	na	Streptococcus suis	Suis	Streptococcus suis	S12X	Contig	2015/02/18	UNIVERSITY OF CAMBRIDGE	ftp://ftp.ncbi.nlm.nih.gov/genomes/all/GCF/000/938/795/GCF_000938795.1_Velvet_assembly
GCF_000942935.1	Y	MG_11	PRJNA224116	SAMEA3234092	F	na	Streptococcus suis	Suis	Streptococcus suis	S97A	Contig	2015/02/18	UNIVERSITY OF CAMBRIDGE	ftp://ftp.ncbi.nlm.nih.gov/genomes/all/GCF/000/942/935/GCF_000942935.1_Velvet_assembly
GCF_000943955.1	Y	MG_11	PRJNA224116	SAMEA3233983	F	na	Streptococcus suis	Suis	Streptococcus suis	S11J	Contig	2015/02/18	UNIVERSITY OF CAMBRIDGE	ftp://ftp.ncbi.nlm.nih.gov/genomes/all/GCF/000/943/955/GCF_000943955.1_Velvet_assembly
GCF_000944815.1	Y	MG_11	PRJNA224116	SAMEA3233762	F	na	Streptococcus suis	Suis	Streptococcus suis	B21Q	Scaffold	2015/02/13	UNIVERSITY OF CAMBRIDGE	ftp://ftp.ncbi.nlm.nih.gov/genomes/all/GCF/000/944/815/GCF_000944815.1_Velvet_assembly
GCF_000945495.1	Y	MG_11	PRJNA224116	SAMEA3234099	F	na	Streptococcus suis	Suis	Streptococcus suis	S99Z	Contig	2015/02/18	UNIVERSITY OF CAMBRIDGE	ftp://ftp.ncbi.nlm.nih.gov/genomes/all/GCF/000/945/495/GCF_000945495.1_Velvet_assembly
GCF_001293215.1	Y	MG_11	PRJNA224116	SAMN03485886	F	na	Streptococcus suis	Suis	Streptococcus suis	ISU2614	Contig	2015/09/17	USDA-ARS	ftp://ftp.ncbi.nlm.nih.gov/genomes/all/GCF/001/293/215/GCF_001293215.1_Ssuis26-14_v1.0
GCF_001293235.1	Y	MG_11	PRJNA224116	SAMN03485884	F	na	Streptococcus suis	Suis	Streptococcus suis	ISU2414	Contig	2015/09/17	USDA-ARS	ftp://ftp.ncbi.nlm.nih.gov/genomes/all/GCF/001/293/235/GCF_001293235.1_Ssuis24-14_v1.0
GCF_001293305.1	Y	MG_11	PRJNA224116	SAMN03485888	F	na	Streptococcus suis	Suis	Streptococcus suis	ISU2812	Contig	2015/09/17	USDA-ARS	ftp://ftp.ncbi.nlm.nih.gov/genomes/all/GCF/001/293/305/GCF_001293305.1_Ssuis28-12_v1.0
GCF_001293355.1	Y	MG_11	PRJNA224116	SAMN03485891	F	na	Streptococcus suis	Suis	Streptococcus suis	ISU2660	Contig	2015/09/17	USDA-ARS	ftp://ftp.ncbi.nlm.nih.gov/genomes/all/GCF/001/293/355/GCF_001293355.1_Ssuis2660_v1.0
GCF_001293375.1	Y	MG_11	PRJNA224116	SAMN03485883	F	na	Streptococcus suis	Suis	Streptococcus suis	SRD478	Contig	2015/09/17	USDA-ARS	ftp://ftp.ncbi.nlm.nih.gov/genomes/all/GCF/001/293/375/GCF_001293375.1_478NasalB_v1.0
GCF_001572685.1	Y	MG_11	PRJNA224116	SAMN04156190	F	na	Streptococcus suis	Suis	Streptococcus suis	NSUI060	Complete	2016/02/25	Public Health Ontario	ftp://ftp.ncbi.nlm.nih.gov/genomes/all/GCF/001/572/685/GCF_001572685.1_ASM157268v1
GCF_001610935.1	Y	MG_11	PRJNA224116	SAMN04044079	F	na	Streptococcus suis	Suis	Streptococcus suis	90-1330	Complete	2016/04/05	Illinois Institute of Technology	ftp://ftp.ncbi.nlm.nih.gov/genomes/all/GCF/001/610/935/GCF_001610935.1_ASM161093v1
GCF_001640765.1	Y	MG_11	PRJNA224116	SAMN04884928	F	na	Streptococcus suis	Suis	Streptococcus suis	DN13	Complete	2016/05/09	Hunan Agricultural University	ftp://ftp.ncbi.nlm.nih.gov/genomes/all/GCF/001/640/765/GCF_001640765.1_ASM164076v1
GCF_002157605.1	Y	MG_11	PRJNA224116	SAMD00066479	F	na	Streptococcus suis	Suis	Streptococcus suis	TANI1	Contig	2017/03/10	Laboratory of Infectious Diseases, Kitasato Institute for Life Sciences, Kitasato University	ftp://ftp.ncbi.nlm.nih.gov/genomes/all/GCF/002/157/605/GCF_002157605.1_ASM215760v1
GCF_002803825.1	Y	MG_11	PRJNA224116	SAMN08040402	F	na	Streptococcus suis	Suis	Streptococcus suis	CZ130302	Complete	2017/12/04	College of Veterinary	ftp://ftp.ncbi.nlm.nih.gov/genomes/all/GCF/002/803/825/GCF_002803825.1_ASM280382v1
GCF_002812525.1	Y	MG_11	PRJNA224116	SAMN08102920	F	na	Streptococcus suis	Suis	Streptococcus suis	AH681	Complete	2017/12/06	Nanjing Agricultural Unversity	ftp://ftp.ncbi.nlm.nih.gov/genomes/all/GCF/002/812/525/GCF_002812525.1_ASM281252v1
GCF_002831545.1	Y	MG_11	PRJNA224116	SAMN08103192	F	na	Streptococcus suis	Suis	Streptococcus suis	HN136	Complete	2017/12/11	Nanjing Agricultural Unversity	ftp://ftp.ncbi.nlm.nih.gov/genomes/all/GCF/002/831/545/GCF_002831545.1_ASM283154v1
GCF_002960015.1	Y	MG_11	PRJNA224116	SAMN08296058	F	na	Streptococcus suis	Suis	Streptococcus suis	3096	Contig	2018/02/28	Huazhong Agricultural University	ftp://ftp.ncbi.nlm.nih.gov/genomes/all/GCF/002/960/015/GCF_002960015.1_ASM296001v1
GCF_002960045.1	Y	MG_11	PRJNA224116	SAMN08296057	F	na	Streptococcus suis	Suis	Streptococcus suis	2873	Contig	2018/02/28	Huazhong Agricultural University	ftp://ftp.ncbi.nlm.nih.gov/genomes/all/GCF/002/960/045/GCF_002960045.1_ASM296004v1
GCF_002960105.1	Y	MG_11	PRJNA224116	SAMN08296054	F	na	Streptococcus suis	Suis	Streptococcus suis	2838	Contig	2018/02/28	Huazhong Agricultural University	ftp://ftp.ncbi.nlm.nih.gov/genomes/all/GCF/002/960/105/GCF_002960105.1_ASM296010v1
GCF_002960125.1	Y	MG_11	PRJNA224116	SAMN08296052	F	na	Streptococcus suis	Suis	Streptococcus suis	2828	Contig	2018/02/28	Huazhong Agricultural University	ftp://ftp.ncbi.nlm.nih.gov/genomes/all/GCF/002/960/125/GCF_002960125.1_ASM296012v1
GCF_002960185.1	Y	MG_11	PRJNA224116	SAMN08296045	F	na	Streptococcus suis	Suis	Streptococcus suis	2737	Contig	2018/02/28	Huazhong Agricultural University	ftp://ftp.ncbi.nlm.nih.gov/genomes/all/GCF/002/960/185/GCF_002960185.1_ASM296018v1
GCF_002960195.1	Y	MG_11	PRJNA224116	SAMN08296048	F	na	Streptococcus suis	Suis	Streptococcus suis	2764	Contig	2018/02/28	Huazhong Agricultural University	ftp://ftp.ncbi.nlm.nih.gov/genomes/all/GCF/002/960/195/GCF_002960195.1_ASM296019v1
GCF_002960265.1	Y	MG_11	PRJNA224116	SAMN08296041	F	na	Streptococcus suis	Suis	Streptococcus suis	2464	Contig	2018/02/28	Huazhong Agricultural University	ftp://ftp.ncbi.nlm.nih.gov/genomes/all/GCF/002/960/265/GCF_002960265.1_ASM296026v1
GCF_002960275.1	Y	MG_11	PRJNA224116	SAMN08296042	F	na	Streptococcus suis	Suis	Streptococcus suis	2481	Contig	2018/02/28	Huazhong Agricultural University	ftp://ftp.ncbi.nlm.nih.gov/genomes/all/GCF/002/960/275/GCF_002960275.1_ASM296027v1
GCF_002960345.1	Y	MG_11	PRJNA224116	SAMN08296040	F	na	Streptococcus suis	Suis	Streptococcus suis	2440	Contig	2018/02/28	Huazhong Agricultural University	ftp://ftp.ncbi.nlm.nih.gov/genomes/all/GCF/002/960/345/GCF_002960345.1_ASM296034v1
GCF_002960385.1	Y	MG_11	PRJNA224116	SAMN08296035	F	na	Streptococcus suis	Suis	Streptococcus suis	2254	Contig	2018/02/28	Huazhong Agricultural University	ftp://ftp.ncbi.nlm.nih.gov/genomes/all/GCF/002/960/385/GCF_002960385.1_ASM296038v1
GCF_002960395.1	Y	MG_11	PRJNA224116	SAMN08296034	F	na	Streptococcus suis	Suis	Streptococcus suis	2233	Contig	2018/02/28	Huazhong Agricultural University	ftp://ftp.ncbi.nlm.nih.gov/genomes/all/GCF/002/960/395/GCF_002960395.1_ASM296039v1
GCF_002960455.1	Y	MG_11	PRJNA224116	SAMN08296031	F	na	Streptococcus suis	Suis	Streptococcus suis	2215	Contig	2018/02/28	Huazhong Agricultural University	ftp://ftp.ncbi.nlm.nih.gov/genomes/all/GCF/002/960/455/GCF_002960455.1_ASM296045v1
GCF_002960495.1	Y	MG_11	PRJNA224116	SAMN08296030	F	na	Streptococcus suis	Suis	Streptococcus suis	2214	Contig	2018/02/28	Huazhong Agricultural University	ftp://ftp.ncbi.nlm.nih.gov/genomes/all/GCF/002/960/495/GCF_002960495.1_ASM296049v1
GCF_002960565.1	Y	MG_11	PRJNA224116	SAMN08296047	F	na	Streptococcus suis	Suis	Streptococcus suis	2761	Contig	2018/02/28	Huazhong Agricultural University	ftp://ftp.ncbi.nlm.nih.gov/genomes/all/GCF/002/960/565/GCF_002960565.1_ASM296056v1
GCF_002960605.1	Y	MG_11	PRJNA224116	SAMN08296029	F	na	Streptococcus suis	Suis	Streptococcus suis	2203-1	Contig	2018/02/28	Huazhong Agricultural University	ftp://ftp.ncbi.nlm.nih.gov/genomes/all/GCF/002/960/605/GCF_002960605.1_ASM296060v1
GCF_002960635.1	Y	MG_11	PRJNA224116	SAMN08296027	F	na	Streptococcus suis	Suis	Streptococcus suis	2169	Contig	2018/02/28	Huazhong Agricultural University	ftp://ftp.ncbi.nlm.nih.gov/genomes/all/GCF/002/960/635/GCF_002960635.1_ASM296063v1
GCF_002960665.1	Y	MG_11	PRJNA224116	SAMN08296025	F	na	Streptococcus suis	Suis	Streptococcus suis	2101	Contig	2018/02/28	Huazhong Agricultural University	ftp://ftp.ncbi.nlm.nih.gov/genomes/all/GCF/002/960/665/GCF_002960665.1_ASM296066v1
GCF_002960695.1	Y	MG_11	PRJNA224116	SAMN08296020	F	na	Streptococcus suis	Suis	Streptococcus suis	2052	Contig	2018/02/28	Huazhong Agricultural University	ftp://ftp.ncbi.nlm.nih.gov/genomes/all/GCF/002/960/695/GCF_002960695.1_ASM296069v1
GCF_002960725.1	Y	MG_11	PRJNA224116	SAMN08296019	F	na	Streptococcus suis	Suis	Streptococcus suis	2049-1	Contig	2018/02/28	Huazhong Agricultural University	ftp://ftp.ncbi.nlm.nih.gov/genomes/all/GCF/002/960/725/GCF_002960725.1_ASM296072v1
GCF_002960745.1	Y	MG_11	PRJNA224116	SAMN08296023	F	na	Streptococcus suis	Suis	Streptococcus suis	2089	Contig	2018/02/28	Huazhong Agricultural University	ftp://ftp.ncbi.nlm.nih.gov/genomes/all/GCF/002/960/745/GCF_002960745.1_ASM296074v1
GCF_002960775.1	Y	MG_11	PRJNA224116	SAMN08296014	F	na	Streptococcus suis	Suis	Streptococcus suis	1980	Contig	2018/02/28	Huazhong Agricultural University	ftp://ftp.ncbi.nlm.nih.gov/genomes/all/GCF/002/960/775/GCF_002960775.1_ASM296077v1
GCF_002960825.1	Y	MG_11	PRJNA224116	SAMN08296010	F	na	Streptococcus suis	Suis	Streptococcus suis	1782	Contig	2018/02/28	Huazhong Agricultural University	ftp://ftp.ncbi.nlm.nih.gov/genomes/all/GCF/002/960/825/GCF_002960825.1_ASM296082v1
GCF_002960905.1	Y	MG_11	PRJNA224116	SAMN08296007	F	na	Streptococcus suis	Suis	Streptococcus suis	1722	Contig	2018/02/28	Huazhong Agricultural University	ftp://ftp.ncbi.nlm.nih.gov/genomes/all/GCF/002/960/905/GCF_002960905.1_ASM296090v1
GCF_002960945.1	Y	MG_11	PRJNA224116	SAMN08296003	F	na	Streptococcus suis	Suis	Streptococcus suis	1496	Contig	2018/02/28	Huazhong Agricultural University	ftp://ftp.ncbi.nlm.nih.gov/genomes/all/GCF/002/960/945/GCF_002960945.1_ASM296094v1
GCF_002960965.1	Y	MG_11	PRJNA224116	SAMN08296001	F	na	Streptococcus suis	Suis	Streptococcus suis	1416	Contig	2018/02/28	Huazhong Agricultural University	ftp://ftp.ncbi.nlm.nih.gov/genomes/all/GCF/002/960/965/GCF_002960965.1_ASM296096v1
GCF_002961005.1	Y	MG_11	PRJNA224116	SAMN08295998	F	na	Streptococcus suis	Suis	Streptococcus suis	1380	Contig	2018/02/28	Huazhong Agricultural University	ftp://ftp.ncbi.nlm.nih.gov/genomes/all/GCF/002/961/005/GCF_002961005.1_ASM296100v1
GCF_002961045.1	Y	MG_11	PRJNA224116	SAMN08295995	F	na	Streptococcus suis	Suis	Streptococcus suis	1369	Contig	2018/02/28	Huazhong Agricultural University	ftp://ftp.ncbi.nlm.nih.gov/genomes/all/GCF/002/961/045/GCF_002961045.1_ASM296104v1
GCF_002961105.1	Y	MG_11	PRJNA224116	SAMN08295991	F	na	Streptococcus suis	Suis	Streptococcus suis	1356	Contig	2018/02/28	Huazhong Agricultural University	ftp://ftp.ncbi.nlm.nih.gov/genomes/all/GCF/002/961/105/GCF_002961105.1_ASM296110v1
GCF_002961145.1	Y	MG_11	PRJNA224116	SAMN08295990	F	na	Streptococcus suis	Suis	Streptococcus suis	1342	Contig	2018/02/28	Huazhong Agricultural University	ftp://ftp.ncbi.nlm.nih.gov/genomes/all/GCF/002/961/145/GCF_002961145.1_ASM296114v1
GCF_002961205.1	Y	MG_11	PRJNA224116	SAMN08295984	F	na	Streptococcus suis	Suis	Streptococcus suis	1279	Contig	2018/02/28	Huazhong Agricultural University	ftp://ftp.ncbi.nlm.nih.gov/genomes/all/GCF/002/961/205/GCF_002961205.1_ASM296120v1
GCF_002961225.1	Y	MG_11	PRJNA224116	SAMN08295982	F	na	Streptococcus suis	Suis	Streptococcus suis	1275	Contig	2018/02/28	Huazhong Agricultural University	ftp://ftp.ncbi.nlm.nih.gov/genomes/all/GCF/002/961/225/GCF_002961225.1_ASM296122v1
GCF_002961235.1	Y	MG_11	PRJNA224116	SAMN08295981	F	na	Streptococcus suis	Suis	Streptococcus suis	1267	Contig	2018/02/28	Huazhong Agricultural University	ftp://ftp.ncbi.nlm.nih.gov/genomes/all/GCF/002/961/235/GCF_002961235.1_ASM296123v1
GCF_002961315.1	Y	MG_11	PRJNA224116	SAMN08295971	F	na	Streptococcus suis	Suis	Streptococcus suis	1219	Contig	2018/02/28	Huazhong Agricultural University	ftp://ftp.ncbi.nlm.nih.gov/genomes/all/GCF/002/961/315/GCF_002961315.1_ASM296131v1
GCF_002961325.1	Y	MG_11	PRJNA224116	SAMN08295970	F	na	Streptococcus suis	Suis	Streptococcus suis	1215	Contig	2018/02/28	Huazhong Agricultural University	ftp://ftp.ncbi.nlm.nih.gov/genomes/all/GCF/002/961/325/GCF_002961325.1_ASM296132v1
GCF_002961425.1	Y	MG_11	PRJNA224116	SAMN08295963	F	na	Streptococcus suis	Suis	Streptococcus suis	1171	Contig	2018/02/28	Huazhong Agricultural University	ftp://ftp.ncbi.nlm.nih.gov/genomes/all/GCF/002/961/425/GCF_002961425.1_ASM296142v1
GCF_002961465.1	Y	MG_11	PRJNA224116	SAMN08295960	F	na	Streptococcus suis	Suis	Streptococcus suis	1164	Contig	2018/02/28	Huazhong Agricultural University	ftp://ftp.ncbi.nlm.nih.gov/genomes/all/GCF/002/961/465/GCF_002961465.1_ASM296146v1
GCF_002961485.1	Y	MG_11	PRJNA224116	SAMN08295959	F	na	Streptococcus suis	Suis	Streptococcus suis	1141-1	Contig	2018/02/28	Huazhong Agricultural University	ftp://ftp.ncbi.nlm.nih.gov/genomes/all/GCF/002/961/485/GCF_002961485.1_ASM296148v1
GCF_002961525.1	Y	MG_11	PRJNA224116	SAMN08295957	F	na	Streptococcus suis	Suis	Streptococcus suis	1123	Contig	2018/02/28	Huazhong Agricultural University	ftp://ftp.ncbi.nlm.nih.gov/genomes/all/GCF/002/961/525/GCF_002961525.1_ASM296152v1
GCF_002961555.1	Y	MG_11	PRJNA224116	SAMN08295956	F	na	Streptococcus suis	Suis	Streptococcus suis	1113	Contig	2018/02/28	Huazhong Agricultural University	ftp://ftp.ncbi.nlm.nih.gov/genomes/all/GCF/002/961/555/GCF_002961555.1_ASM296155v1
GCF_002961565.1	Y	MG_11	PRJNA224116	SAMN08295954	F	na	Streptococcus suis	Suis	Streptococcus suis	1101	Contig	2018/02/28	Huazhong Agricultural University	ftp://ftp.ncbi.nlm.nih.gov/genomes/all/GCF/002/961/565/GCF_002961565.1_ASM296156v1
GCF_002961605.1	Y	MG_11	PRJNA224116	SAMN08295952	F	na	Streptococcus suis	Suis	Streptococcus suis	1076	Contig	2018/02/28	Huazhong Agricultural University	ftp://ftp.ncbi.nlm.nih.gov/genomes/all/GCF/002/961/605/GCF_002961605.1_ASM296160v1
GCF_002961645.1	Y	MG_11	PRJNA224116	SAMN08295948	F	na	Streptococcus suis	Suis	Streptococcus suis	1059	Contig	2018/02/28	Huazhong Agricultural University	ftp://ftp.ncbi.nlm.nih.gov/genomes/all/GCF/002/961/645/GCF_002961645.1_ASM296164v1
GCF_002961765.1	Y	MG_11	PRJNA224116	SAMN08295942	F	na	Streptococcus suis	Suis	Streptococcus suis	1044	Contig	2018/02/28	Huazhong Agricultural University	ftp://ftp.ncbi.nlm.nih.gov/genomes/all/GCF/002/961/765/GCF_002961765.1_ASM296176v1
GCF_002961845.1	Y	MG_11	PRJNA224116	SAMN08295936	F	na	Streptococcus suis	Suis	Streptococcus suis	970	Contig	2018/02/28	Huazhong Agricultural University	ftp://ftp.ncbi.nlm.nih.gov/genomes/all/GCF/002/961/845/GCF_002961845.1_ASM296184v1
GCF_002961965.1	Y	MG_11	PRJNA224116	SAMN08295923	F	na	Streptococcus suis	Suis	Streptococcus suis	0915-1	Contig	2018/02/28	Huazhong Agricultural University	ftp://ftp.ncbi.nlm.nih.gov/genomes/all/GCF/002/961/965/GCF_002961965.1_ASM296196v1
GCF_002962045.1	Y	MG_11	PRJNA224116	SAMN08295920	F	na	Streptococcus suis	Suis	Streptococcus suis	899	Contig	2018/02/28	Huazhong Agricultural University	ftp://ftp.ncbi.nlm.nih.gov/genomes/all/GCF/002/962/045/GCF_002962045.1_ASM296204v1
GCF_002962085.1	Y	MG_11	PRJNA224116	SAMN08295918	F	na	Streptococcus suis	Suis	Streptococcus suis	893	Contig	2018/02/28	Huazhong Agricultural University	ftp://ftp.ncbi.nlm.nih.gov/genomes/all/GCF/002/962/085/GCF_002962085.1_ASM296208v1
GCF_002962105.1	Y	MG_11	PRJNA224116	SAMN08295917	F	na	Streptococcus suis	Suis	Streptococcus suis	890	Contig	2018/02/28	Huazhong Agricultural University	ftp://ftp.ncbi.nlm.nih.gov/genomes/all/GCF/002/962/105/GCF_002962105.1_ASM296210v1
GCF_002962155.1	Y	MG_11	PRJNA224116	SAMN08295915	F	na	Streptococcus suis	Suis	Streptococcus suis	874	Contig	2018/02/28	Huazhong Agricultural University	ftp://ftp.ncbi.nlm.nih.gov/genomes/all/GCF/002/962/155/GCF_002962155.1_ASM296215v1
GCF_002962185.1	Y	MG_11	PRJNA224116	SAMN08295911	F	na	Streptococcus suis	Suis	Streptococcus suis	859	Contig	2018/02/28	Huazhong Agricultural University	ftp://ftp.ncbi.nlm.nih.gov/genomes/all/GCF/002/962/185/GCF_002962185.1_ASM296218v1
GCF_002962195.1	Y	MG_11	PRJNA224116	SAMN08295907	F	na	Streptococcus suis	Suis	Streptococcus suis	849	Contig	2018/02/28	Huazhong Agricultural University	ftp://ftp.ncbi.nlm.nih.gov/genomes/all/GCF/002/962/195/GCF_002962195.1_ASM296219v1
GCF_002962225.1	Y	MG_11	PRJNA224116	SAMN08295904	F	na	Streptococcus suis	Suis	Streptococcus suis	819	Contig	2018/02/28	Huazhong Agricultural University	ftp://ftp.ncbi.nlm.nih.gov/genomes/all/GCF/002/962/225/GCF_002962225.1_ASM296222v1
GCF_002962245.1	Y	MG_11	PRJNA224116	SAMN08295903	F	na	Streptococcus suis	Suis	Streptococcus suis	812	Contig	2018/02/28	Huazhong Agricultural University	ftp://ftp.ncbi.nlm.nih.gov/genomes/all/GCF/002/962/245/GCF_002962245.1_ASM296224v1
GCF_002962265.1	Y	MG_11	PRJNA224116	SAMN08295901	F	na	Streptococcus suis	Suis	Streptococcus suis	810	Contig	2018/02/28	Huazhong Agricultural University	ftp://ftp.ncbi.nlm.nih.gov/genomes/all/GCF/002/962/265/GCF_002962265.1_ASM296226v1
GCF_002962295.1	Y	MG_11	PRJNA224116	SAMN08295897	F	na	Streptococcus suis	Suis	Streptococcus suis	801	Contig	2018/02/28	Huazhong Agricultural University	ftp://ftp.ncbi.nlm.nih.gov/genomes/all/GCF/002/962/295/GCF_002962295.1_ASM296229v1
GCF_002962305.1	Y	MG_11	PRJNA224116	SAMN08295896	F	na	Streptococcus suis	Suis	Streptococcus suis	797	Contig	2018/02/28	Huazhong Agricultural University	ftp://ftp.ncbi.nlm.nih.gov/genomes/all/GCF/002/962/305/GCF_002962305.1_ASM296230v1
GCF_002962345.1	Y	MG_11	PRJNA224116	SAMN08295895	F	na	Streptococcus suis	Suis	Streptococcus suis	796	Contig	2018/02/28	Huazhong Agricultural University	ftp://ftp.ncbi.nlm.nih.gov/genomes/all/GCF/002/962/345/GCF_002962345.1_ASM296234v1
GCF_002962375.1	Y	MG_11	PRJNA224116	SAMN08295892	F	na	Streptococcus suis	Suis	Streptococcus suis	786	Contig	2018/02/28	Huazhong Agricultural University	ftp://ftp.ncbi.nlm.nih.gov/genomes/all/GCF/002/962/375/GCF_002962375.1_ASM296237v1
GCF_002962485.1	Y	MG_11	PRJNA224116	SAMN08296026	F	na	Streptococcus suis	Suis	Streptococcus suis	2151	Contig	2018/02/28	Huazhong Agricultural University	ftp://ftp.ncbi.nlm.nih.gov/genomes/all/GCF/002/962/485/GCF_002962485.1_ASM296248v1
GCF_002962515.1	Y	MG_11	PRJNA224116	SAMN08296022	F	na	Streptococcus suis	Suis	Streptococcus suis	2080	Contig	2018/02/28	Huazhong Agricultural University	ftp://ftp.ncbi.nlm.nih.gov/genomes/all/GCF/002/962/515/GCF_002962515.1_ASM296251v1
GCF_002962565.1	Y	MG_11	PRJNA224116	SAMN08296016	F	na	Streptococcus suis	Suis	Streptococcus suis	2010	Contig	2018/02/28	Huazhong Agricultural University	ftp://ftp.ncbi.nlm.nih.gov/genomes/all/GCF/002/962/565/GCF_002962565.1_ASM296256v1
GCF_002962595.1	Y	MG_11	PRJNA224116	SAMN08296015	F	na	Streptococcus suis	Suis	Streptococcus suis	1982	Contig	2018/02/28	Huazhong Agricultural University	ftp://ftp.ncbi.nlm.nih.gov/genomes/all/GCF/002/962/595/GCF_002962595.1_ASM296259v1
GCF_002962715.1	Y	MG_11	PRJNA224116	SAMN08295993	F	na	Streptococcus suis	Suis	Streptococcus suis	1360	Contig	2018/02/28	Huazhong Agricultural University	ftp://ftp.ncbi.nlm.nih.gov/genomes/all/GCF/002/962/715/GCF_002962715.1_ASM296271v1
GCF_002962785.1	Y	MG_11	PRJNA224116	SAMN08295987	F	na	Streptococcus suis	Suis	Streptococcus suis	1317	Contig	2018/02/28	Huazhong Agricultural University	ftp://ftp.ncbi.nlm.nih.gov/genomes/all/GCF/002/962/785/GCF_002962785.1_ASM296278v1
GCF_002962815.1	Y	MG_11	PRJNA224116	SAMN08295985	F	na	Streptococcus suis	Suis	Streptococcus suis	1313	Contig	2018/02/28	Huazhong Agricultural University	ftp://ftp.ncbi.nlm.nih.gov/genomes/all/GCF/002/962/815/GCF_002962815.1_ASM296281v1
GCF_002962915.1	Y	MG_11	PRJNA224116	SAMN08295967	F	na	Streptococcus suis	Suis	Streptococcus suis	1194	Contig	2018/02/28	Huazhong Agricultural University	ftp://ftp.ncbi.nlm.nih.gov/genomes/all/GCF/002/962/915/GCF_002962915.1_ASM296291v1
GCF_002962945.1	Y	MG_11	PRJNA224116	SAMN08295965	F	na	Streptococcus suis	Suis	Streptococcus suis	1180	Contig	2018/02/28	Huazhong Agricultural University	ftp://ftp.ncbi.nlm.nih.gov/genomes/all/GCF/002/962/945/GCF_002962945.1_ASM296294v1
GCF_002962965.1	Y	MG_11	PRJNA224116	SAMN08295964	F	na	Streptococcus suis	Suis	Streptococcus suis	1176	Contig	2018/02/28	Huazhong Agricultural University	ftp://ftp.ncbi.nlm.nih.gov/genomes/all/GCF/002/962/965/GCF_002962965.1_ASM296296v1
GCF_002962975.1	Y	MG_11	PRJNA224116	SAMN08295953	F	na	Streptococcus suis	Suis	Streptococcus suis	1100	Contig	2018/02/28	Huazhong Agricultural University	ftp://ftp.ncbi.nlm.nih.gov/genomes/all/GCF/002/962/975/GCF_002962975.1_ASM296297v1
GCF_002963005.1	Y	MG_11	PRJNA224116	SAMN08295961	F	na	Streptococcus suis	Suis	Streptococcus suis	1165	Contig	2018/02/28	Huazhong Agricultural University	ftp://ftp.ncbi.nlm.nih.gov/genomes/all/GCF/002/963/005/GCF_002963005.1_ASM296300v1
GCF_002963025.1	Y	MG_11	PRJNA224116	SAMN08295950	F	na	Streptococcus suis	Suis	Streptococcus suis	1069	Contig	2018/02/28	Huazhong Agricultural University	ftp://ftp.ncbi.nlm.nih.gov/genomes/all/GCF/002/963/025/GCF_002963025.1_ASM296302v1
GCF_002963035.1	Y	MG_11	PRJNA224116	SAMN08295940	F	na	Streptococcus suis	Suis	Streptococcus suis	1024-1	Contig	2018/02/28	Huazhong Agricultural University	ftp://ftp.ncbi.nlm.nih.gov/genomes/all/GCF/002/963/035/GCF_002963035.1_ASM296303v1
GCF_002963065.1	Y	MG_11	PRJNA224116	SAMN08295943	F	na	Streptococcus suis	Suis	Streptococcus suis	1047	Contig	2018/02/28	Huazhong Agricultural University	ftp://ftp.ncbi.nlm.nih.gov/genomes/all/GCF/002/963/065/GCF_002963065.1_ASM296306v1
GCF_002963125.1	Y	MG_11	PRJNA224116	SAMN08295932	F	na	Streptococcus suis	Suis	Streptococcus suis	964	Contig	2018/02/28	Huazhong Agricultural University	ftp://ftp.ncbi.nlm.nih.gov/genomes/all/GCF/002/963/125/GCF_002963125.1_ASM296312v1
GCF_002963205.1	Y	MG_11	PRJNA224116	SAMN08295928	F	na	Streptococcus suis	Suis	Streptococcus suis	949	Contig	2018/02/28	Huazhong Agricultural University	ftp://ftp.ncbi.nlm.nih.gov/genomes/all/GCF/002/963/205/GCF_002963205.1_ASM296320v1
GCF_002963325.1	Y	MG_11	PRJNA224116	SAMN08295906	F	na	Streptococcus suis	Suis	Streptococcus suis	847	Contig	2018/02/28	Huazhong Agricultural University	ftp://ftp.ncbi.nlm.nih.gov/genomes/all/GCF/002/963/325/GCF_002963325.1_ASM296332v1
GCF_002963345.1	Y	MG_11	PRJNA224116	SAMN08295905	F	na	Streptococcus suis	Suis	Streptococcus suis	832	Contig	2018/02/28	Huazhong Agricultural University	ftp://ftp.ncbi.nlm.nih.gov/genomes/all/GCF/002/963/345/GCF_002963345.1_ASM296334v1
GCF_002963405.1	Y	MG_11	PRJNA224116	SAMN08295898	F	na	Streptococcus suis	Suis	Streptococcus suis	803	Contig	2018/02/28	Huazhong Agricultural University	ftp://ftp.ncbi.nlm.nih.gov/genomes/all/GCF/002/963/405/GCF_002963405.1_ASM296340v1
GCF_002963425.1	Y	MG_11	PRJNA224116	SAMN08295894	F	na	Streptococcus suis	Suis	Streptococcus suis	794	Contig	2018/02/28	Huazhong Agricultural University	ftp://ftp.ncbi.nlm.nih.gov/genomes/all/GCF/002/963/425/GCF_002963425.1_ASM296342v1
GCF_002963465.1	Y	MG_11	PRJNA224116	SAMN08295885	F	na	Streptococcus suis	Suis	Streptococcus suis	667	Contig	2018/02/28	Huazhong Agricultural University	ftp://ftp.ncbi.nlm.nih.gov/genomes/all/GCF/002/963/465/GCF_002963465.1_ASM296346v1
GCF_002963485.1	Y	MG_11	PRJNA224116	SAMN08295887	F	na	Streptococcus suis	Suis	Streptococcus suis	676	Contig	2018/02/28	Huazhong Agricultural University	ftp://ftp.ncbi.nlm.nih.gov/genomes/all/GCF/002/963/485/GCF_002963485.1_ASM296348v1
GCF_002963505.1	Y	MG_11	PRJNA224116	SAMN08295883	F	na	Streptococcus suis	Suis	Streptococcus suis	649	Contig	2018/02/28	Huazhong Agricultural University	ftp://ftp.ncbi.nlm.nih.gov/genomes/all/GCF/002/963/505/GCF_002963505.1_ASM296350v1
GCF_002963525.1	Y	MG_11	PRJNA224116	SAMN08295882	F	na	Streptococcus suis	Suis	Streptococcus suis	639	Contig	2018/02/28	Huazhong Agricultural University	ftp://ftp.ncbi.nlm.nih.gov/genomes/all/GCF/002/963/525/GCF_002963525.1_ASM296352v1
GCF_002963585.1	Y	MG_11	PRJNA224116	SAMN08295886	F	na	Streptococcus suis	Suis	Streptococcus suis	673	Contig	2018/02/28	Huazhong Agricultural University	ftp://ftp.ncbi.nlm.nih.gov/genomes/all/GCF/002/963/585/GCF_002963585.1_ASM296358v1
GCF_002963595.1	Y	MG_11	PRJNA224116	SAMN08295877	F	na	Streptococcus suis	Suis	Streptococcus suis	0424-1	Contig	2018/02/28	Huazhong Agricultural University	ftp://ftp.ncbi.nlm.nih.gov/genomes/all/GCF/002/963/595/GCF_002963595.1_ASM296359v1
GCF_002963645.1	Y	MG_11	PRJNA224116	SAMN08295876	F	na	Streptococcus suis	Suis	Streptococcus suis	393	Contig	2018/02/28	Huazhong Agricultural University	ftp://ftp.ncbi.nlm.nih.gov/genomes/all/GCF/002/963/645/GCF_002963645.1_ASM296364v1
GCF_002963655.1	Y	MG_11	PRJNA224116	SAMN08295873	F	na	Streptococcus suis	Suis	Streptococcus suis	356	Contig	2018/02/28	Huazhong Agricultural University	ftp://ftp.ncbi.nlm.nih.gov/genomes/all/GCF/002/963/655/GCF_002963655.1_ASM296365v1
GCF_002963685.1	Y	MG_11	PRJNA224116	SAMN08295875	F	na	Streptococcus suis	Suis	Streptococcus suis	380	Contig	2018/02/28	Huazhong Agricultural University	ftp://ftp.ncbi.nlm.nih.gov/genomes/all/GCF/002/963/685/GCF_002963685.1_ASM296368v1
GCF_002963695.1	Y	MG_11	PRJNA224116	SAMN08295874	F	na	Streptococcus suis	Suis	Streptococcus suis	378	Contig	2018/02/28	Huazhong Agricultural University	ftp://ftp.ncbi.nlm.nih.gov/genomes/all/GCF/002/963/695/GCF_002963695.1_ASM296369v1
GCF_002963805.1	Y	MG_11	PRJNA224116	SAMN08295866	F	na	Streptococcus suis	Suis	Streptococcus suis	262	Contig	2018/02/28	Huazhong Agricultural University	ftp://ftp.ncbi.nlm.nih.gov/genomes/all/GCF/002/963/805/GCF_002963805.1_ASM296380v1
GCF_002963865.1	Y	MG_11	PRJNA224116	SAMN08295862	F	na	Streptococcus suis	Suis	Streptococcus suis	191	Contig	2018/02/28	Huazhong Agricultural University	ftp://ftp.ncbi.nlm.nih.gov/genomes/all/GCF/002/963/865/GCF_002963865.1_ASM296386v1
GCF_002963885.1	Y	MG_11	PRJNA224116	SAMN08295859	F	na	Streptococcus suis	Suis	Streptococcus suis	180	Contig	2018/02/28	Huazhong Agricultural University	ftp://ftp.ncbi.nlm.nih.gov/genomes/all/GCF/002/963/885/GCF_002963885.1_ASM296388v1
GCF_002963905.1	Y	MG_11	PRJNA224116	SAMN08295856	F	na	Streptococcus suis	Suis	Streptococcus suis	148	Contig	2018/02/28	Huazhong Agricultural University	ftp://ftp.ncbi.nlm.nih.gov/genomes/all/GCF/002/963/905/GCF_002963905.1_ASM296390v1
GCF_002963985.1	Y	MG_11	PRJNA224116	SAMN08295851	F	na	Streptococcus suis	Suis	Streptococcus suis	123	Contig	2018/02/28	Huazhong Agricultural University	ftp://ftp.ncbi.nlm.nih.gov/genomes/all/GCF/002/963/985/GCF_002963985.1_ASM296398v1
GCF_002964085.1	Y	MG_11	PRJNA224116	SAMN08295870	F	na	Streptococcus suis	Suis	Streptococcus suis	347	Contig	2018/02/28	Huazhong Agricultural University	ftp://ftp.ncbi.nlm.nih.gov/genomes/all/GCF/002/964/085/GCF_002964085.1_ASM296408v1
GCF_002964145.1	Y	MG_11	PRJNA224116	SAMN08295867	F	na	Streptococcus suis	Suis	Streptococcus suis	293	Contig	2018/02/28	Huazhong Agricultural University	ftp://ftp.ncbi.nlm.nih.gov/genomes/all/GCF/002/964/145/GCF_002964145.1_ASM296414v1
GCF_002964165.1	Y	MG_11	PRJNA224116	SAMN08295860	F	na	Streptococcus suis	Suis	Streptococcus suis	183	Contig	2018/02/28	Huazhong Agricultural University	ftp://ftp.ncbi.nlm.nih.gov/genomes/all/GCF/002/964/165/GCF_002964165.1_ASM296416v1
GCF_002964205.1	Y	MG_11	PRJNA224116	SAMN08295857	F	na	Streptococcus suis	Suis	Streptococcus suis	166	Contig	2018/02/28	Huazhong Agricultural University	ftp://ftp.ncbi.nlm.nih.gov/genomes/all/GCF/002/964/205/GCF_002964205.1_ASM296420v1
GCF_002964225.1	Y	MG_11	PRJNA224116	SAMN08295852	F	na	Streptococcus suis	Suis	Streptococcus suis	138	Contig	2018/02/28	Huazhong Agricultural University	ftp://ftp.ncbi.nlm.nih.gov/genomes/all/GCF/002/964/225/GCF_002964225.1_ASM296422v1
GCF_002964525.1	Y	MG_11	PRJNA224116	SAMN08295840	F	na	Streptococcus suis	Suis	Streptococcus suis	31	Contig	2018/02/28	Huazhong Agricultural University	ftp://ftp.ncbi.nlm.nih.gov/genomes/all/GCF/002/964/525/GCF_002964525.1_ASM296452v1
GCF_003144175.1	Y	MG_11	PRJNA224116	SAMN09080446	F	na	Streptococcus suis	Suis	Streptococcus suis	HN105	Complete	2018/05/21	Nanjing agricultual University	ftp://ftp.ncbi.nlm.nih.gov/genomes/all/GCF/003/144/175/GCF_003144175.1_ASM314417v1
GCF_003285225.1	Y	MG_11	PRJNA224116	SAMN05912964	F	na	Streptococcus suis	Suis	Streptococcus suis	0061	Complete	2018/07/02	Huazhong Agricultural University	ftp://ftp.ncbi.nlm.nih.gov/genomes/all/GCF/003/285/225/GCF_003285225.1_ASM328522v1
GCF_003352205.1	Y	MG_11	PRJNA224116	SAMN09460429	F	na	Streptococcus suis	Suis	Streptococcus suis	HA1003	Complete	2018/08/01	Jiangsu Academy of Agricultural Sciences	ftp://ftp.ncbi.nlm.nih.gov/genomes/all/GCF/003/352/205/GCF_003352205.1_ASM335220v1
GCF_003352225.1	Y	MG_11	PRJNA224116	SAMN09460428	F	na	Streptococcus suis	Suis	Streptococcus suis	SH1510	Complete	2018/08/01	Jiangsu Academy of Agricultural Sciences	ftp://ftp.ncbi.nlm.nih.gov/genomes/all/GCF/003/352/225/GCF_003352225.1_ASM335222v1
GCF_003931695.1	Y	MG_11	PRJNA224116	SAMN10440287	F	na	Streptococcus suis	Suis	Streptococcus suis	IMT40738	Contig	2018/12/08	VASIB: Verringerung des Einsatzes von Antibiotika in der Schweinehaltung durch Integration epidemiologischer Informationen aus klinischer, hygienischer, mikrobiologischer und pharmakologischer tierärztlicher Beratung - Reduction of antibiotic	ftp://ftp.ncbi.nlm.nih.gov/genomes/all/GCF/003/931/695/GCF_003931695.1_ASM393169v1
GCF_003931705.1	Y	MG_11	PRJNA224116	SAMN10440285	F	na	Streptococcus suis	Suis	Streptococcus suis	IMT40201	Contig	2018/12/08	VASIB: Verringerung des Einsatzes von Antibiotika in der Schweinehaltung durch Integration epidemiologischer Informationen aus klinischer, hygienischer, mikrobiologischer und pharmakologischer tierärztlicher Beratung - Reduction of antibiotic	ftp://ftp.ncbi.nlm.nih.gov/genomes/all/GCF/003/931/705/GCF_003931705.1_ASM393170v1
GCF_003931715.1	Y	MG_11	PRJNA224116	SAMN10440286	F	na	Streptococcus suis	Suis	Streptococcus suis	IMT40343	Contig	2018/12/08	VASIB: Verringerung des Einsatzes von Antibiotika in der Schweinehaltung durch Integration epidemiologischer Informationen aus klinischer, hygienischer, mikrobiologischer und pharmakologischer tierärztlicher Beratung - Reduction of antibiotic	ftp://ftp.ncbi.nlm.nih.gov/genomes/all/GCF/003/931/715/GCF_003931715.1_ASM393171v1
GCF_003933805.1	Y	MG_11	PRJNA224116	SAMN10464079	F	na	Streptococcus suis	Suis	Streptococcus suis	SS470	Contig	2018/12/10	University of Zurich	ftp://ftp.ncbi.nlm.nih.gov/genomes/all/GCF/003/933/805/GCF_003933805.1_ASM393380v1
GCF_003933835.1	Y	MG_11	PRJNA224116	SAMN10464077	F	na	Streptococcus suis	Suis	Streptococcus suis	SS1014	Contig	2018/12/10	University of Zurich	ftp://ftp.ncbi.nlm.nih.gov/genomes/all/GCF/003/933/835/GCF_003933835.1_ASM393383v1
GCF_003933845.1	Y	MG_11	PRJNA224116	SAMN10464074	F	na	Streptococcus suis	Suis	Streptococcus suis	PP536	Contig	2018/12/10	University of Zurich	ftp://ftp.ncbi.nlm.nih.gov/genomes/all/GCF/003/933/845/GCF_003933845.1_ASM393384v1
GCF_003933905.1	Y	MG_11	PRJNA224116	SAMN10464071	F	na	Streptococcus suis	Suis	Streptococcus suis	PP425	Contig	2018/12/10	University of Zurich	ftp://ftp.ncbi.nlm.nih.gov/genomes/all/GCF/003/933/905/GCF_003933905.1_ASM393390v1
GCF_003933945.1	Y	MG_11	PRJNA224116	SAMN10464067	F	na	Streptococcus suis	Suis	Streptococcus suis	PP269	Contig	2018/12/10	University of Zurich	ftp://ftp.ncbi.nlm.nih.gov/genomes/all/GCF/003/933/945/GCF_003933945.1_ASM393394v1
GCF_003933955.1	Y	MG_11	PRJNA224116	SAMN10464073	F	na	Streptococcus suis	Suis	Streptococcus suis	PP464	Contig	2018/12/10	University of Zurich	ftp://ftp.ncbi.nlm.nih.gov/genomes/all/GCF/003/933/955/GCF_003933955.1_ASM393395v1
GCF_004843685.1	Y	MG_11	PRJNA224116	SAMN11431856	F	na	Streptococcus suis	Suis	Streptococcus suis	WUSS351	Complete	2019/04/24	Nanjing Agricultural University	ftp://ftp.ncbi.nlm.nih.gov/genomes/all/GCF/004/843/685/GCF_004843685.1_ASM484368v1
GCF_004922805.1	Y	MG_11	PRJNA224116	SAMN11431410	F	na	Streptococcus suis	Suis	Streptococcus suis	WUSS328	Contig	2019/04/29	Nanjing Agricultural University	ftp://ftp.ncbi.nlm.nih.gov/genomes/all/GCF/004/922/805/GCF_004922805.1_ASM492280v1
GCF_004922815.1	Y	MG_11	PRJNA224116	SAMN11431133	F	na	Streptococcus suis	Suis	Streptococcus suis	WUSS286	Scaffold	2019/04/29	Nanjing Agricultural University	ftp://ftp.ncbi.nlm.nih.gov/genomes/all/GCF/004/922/815/GCF_004922815.1_ASM492281v1
GCF_004922825.1	Y	MG_11	PRJNA224116	SAMN11431407	F	na	Streptococcus suis	Suis	Streptococcus suis	WUSS327	Scaffold	2019/04/29	Nanjing Agricultural University	ftp://ftp.ncbi.nlm.nih.gov/genomes/all/GCF/004/922/825/GCF_004922825.1_ASM492282v1
GCF_004922855.1	Y	MG_11	PRJNA224116	SAMN11431417	F	na	Streptococcus suis	Suis	Streptococcus suis	WUSS330	Scaffold	2019/04/29	Nanjing Agricultural University	ftp://ftp.ncbi.nlm.nih.gov/genomes/all/GCF/004/922/855/GCF_004922855.1_ASM492285v1
GCF_004922915.1	Y	MG_11	PRJNA224116	SAMN11431428	F	na	Streptococcus suis	Suis	Streptococcus suis	WUSS425	Scaffold	2019/04/29	Nanjing Agricultural University	ftp://ftp.ncbi.nlm.nih.gov/genomes/all/GCF/004/922/915/GCF_004922915.1_ASM492291v1
GCF_900007885.1	Y	MG_11	PRJNA224116	SAMEA3595182	F	na	Streptococcus suis	Suis	Streptococcus suis	920694	Contig	2016/07/01	ACADEMIC MEDICAL CENTER	ftp://ftp.ncbi.nlm.nih.gov/genomes/all/GCF/900/007/885/GCF_900007885.1_assembly_920694
GCF_900007915.1	Y	MG_11	PRJNA224116	SAMEA3595218	F	na	Streptococcus suis	Suis	Streptococcus suis	GD-0015	Contig	2016/07/01	ACADEMIC MEDICAL CENTER	ftp://ftp.ncbi.nlm.nih.gov/genomes/all/GCF/900/007/915/GCF_900007915.1_assembly_GD-0015
GCF_900007935.1	Y	MG_11	PRJNA224116	SAMEA3595223	F	na	Streptococcus suis	Suis	Streptococcus suis	GD-0027	Scaffold	2016/07/01	ACADEMIC MEDICAL CENTER	ftp://ftp.ncbi.nlm.nih.gov/genomes/all/GCF/900/007/935/GCF_900007935.1_assembly_GD-0027
GCF_900007945.1	Y	MG_11	PRJNA224116	SAMEA3595230	F	na	Streptococcus suis	Suis	Streptococcus suis	GD-0050	Contig	2016/07/01	ACADEMIC MEDICAL CENTER	ftp://ftp.ncbi.nlm.nih.gov/genomes/all/GCF/900/007/945/GCF_900007945.1_assembly_GD-0050
GCF_900007975.1	Y	MG_11	PRJNA224116	SAMEA3595240	F	na	Streptococcus suis	Suis	Streptococcus suis	GD-0070	Contig	2016/07/01	ACADEMIC MEDICAL CENTER	ftp://ftp.ncbi.nlm.nih.gov/genomes/all/GCF/900/007/975/GCF_900007975.1_assembly_GD-0070
GCF_900007985.1	Y	MG_11	PRJNA224116	SAMEA3595243	F	na	Streptococcus suis	Suis	Streptococcus suis	GD-0076	Contig	2016/07/01	ACADEMIC MEDICAL CENTER	ftp://ftp.ncbi.nlm.nih.gov/genomes/all/GCF/900/007/985/GCF_900007985.1_assembly_GD-0076
GCF_900008015.1	Y	MG_11	PRJNA224116	SAMEA3595254	F	na	Streptococcus suis	Suis	Streptococcus suis	GD-0098	Contig	2016/07/01	ACADEMIC MEDICAL CENTER	ftp://ftp.ncbi.nlm.nih.gov/genomes/all/GCF/900/008/015/GCF_900008015.1_assembly_GD-0098
GCF_900008065.1	Y	MG_11	PRJNA224116	SAMEA3595262	F	na	Streptococcus suis	Suis	Streptococcus suis	GD-0112	Scaffold	2016/07/01	ACADEMIC MEDICAL CENTER	ftp://ftp.ncbi.nlm.nih.gov/genomes/all/GCF/900/008/065/GCF_900008065.1_assembly_GD-0112
GCF_900009175.1	Y	MG_11	PRJNA224116	SAMEA3595235	F	na	Streptococcus suis	Suis	Streptococcus suis	GD-0057	Contig	2016/07/01	ACADEMIC MEDICAL CENTER	ftp://ftp.ncbi.nlm.nih.gov/genomes/all/GCF/900/009/175/GCF_900009175.1_assembly_GD-0057
GCF_900009315.1	Y	MG_11	PRJNA224116	SAMEA3595213	F	na	Streptococcus suis	Suis	Streptococcus suis	GD-0007	Contig	2016/07/01	ACADEMIC MEDICAL CENTER	ftp://ftp.ncbi.nlm.nih.gov/genomes/all/GCF/900/009/315/GCF_900009315.1_assembly_GD-0007
GCF_900009625.1	Y	MG_11	PRJNA224116	SAMEA3595241	F	na	Streptococcus suis	Suis	Streptococcus suis	GD-0072	Contig	2016/07/01	ACADEMIC MEDICAL CENTER	ftp://ftp.ncbi.nlm.nih.gov/genomes/all/GCF/900/009/625/GCF_900009625.1_assembly_GD-0072
GCF_900009755.1	Y	MG_11	PRJNA224116	SAMEA3595203	F	na	Streptococcus suis	Suis	Streptococcus suis	9402372	Contig	2016/07/01	ACADEMIC MEDICAL CENTER	ftp://ftp.ncbi.nlm.nih.gov/genomes/all/GCF/900/009/755/GCF_900009755.1_assembly_9402372
GCF_900009785.1	Y	MG_11	PRJNA224116	SAMEA3595245	F	na	Streptococcus suis	Suis	Streptococcus suis	GD-0079	Contig	2016/07/01	ACADEMIC MEDICAL CENTER	ftp://ftp.ncbi.nlm.nih.gov/genomes/all/GCF/900/009/785/GCF_900009785.1_assembly_GD-0079
GCF_900009915.1	Y	MG_11	PRJNA224116	SAMEA3595257	F	na	Streptococcus suis	Suis	Streptococcus suis	GD-0105	Contig	2016/07/01	ACADEMIC MEDICAL CENTER	ftp://ftp.ncbi.nlm.nih.gov/genomes/all/GCF/900/009/915/GCF_900009915.1_assembly_GD-0105
GCF_900010195.1	Y	MG_11	PRJNA224116	SAMEA3595249	F	na	Streptococcus suis	Suis	Streptococcus suis	GD-0087	Contig	2016/07/01	ACADEMIC MEDICAL CENTER	ftp://ftp.ncbi.nlm.nih.gov/genomes/all/GCF/900/010/195/GCF_900010195.1_assembly_GD-0087
GCF_900010565.1	Y	MG_11	PRJNA224116	SAMEA3595206	F	na	Streptococcus suis	Suis	Streptococcus suis	12V457	Contig	2016/07/01	ACADEMIC MEDICAL CENTER	ftp://ftp.ncbi.nlm.nih.gov/genomes/all/GCF/900/010/565/GCF_900010565.1_assembly_12V457
GCF_900011035.1	Y	MG_11	PRJNA224116	SAMEA3595211	F	na	Streptococcus suis	Suis	Streptococcus suis	GD-0004	Scaffold	2016/07/01	ACADEMIC MEDICAL CENTER	ftp://ftp.ncbi.nlm.nih.gov/genomes/all/GCF/900/011/035/GCF_900011035.1_assembly_GD-0004
GCF_900011045.1	Y	MG_11	PRJNA224116	SAMEA3595239	F	na	Streptococcus suis	Suis	Streptococcus suis	GD-0067	Contig	2016/07/01	ACADEMIC MEDICAL CENTER	ftp://ftp.ncbi.nlm.nih.gov/genomes/all/GCF/900/011/045/GCF_900011045.1_assembly_GD-0067
GCF_900011215.1	Y	MG_11	PRJNA224116	SAMEA3595236	F	na	Streptococcus suis	Suis	Streptococcus suis	GD-0061	Scaffold	2016/07/01	ACADEMIC MEDICAL CENTER	ftp://ftp.ncbi.nlm.nih.gov/genomes/all/GCF/900/011/215/GCF_900011215.1_assembly_GD-0061
GCF_900011445.1	Y	MG_11	PRJNA224116	SAMEA3595204	F	na	Streptococcus suis	Suis	Streptococcus suis	9406160	Contig	2016/07/01	ACADEMIC MEDICAL CENTER	ftp://ftp.ncbi.nlm.nih.gov/genomes/all/GCF/900/011/445/GCF_900011445.1_assembly_9406160
GCF_900011455.1	Y	MG_11	PRJNA224116	SAMEA3595237	F	na	Streptococcus suis	Suis	Streptococcus suis	GD-0063	Contig	2016/07/01	ACADEMIC MEDICAL CENTER	ftp://ftp.ncbi.nlm.nih.gov/genomes/all/GCF/900/011/455/GCF_900011455.1_assembly_GD-0063
GCF_900012315.1	Y	MG_11	PRJNA224116	SAMEA3595219	F	na	Streptococcus suis	Suis	Streptococcus suis	GD-0018	Contig	2016/07/01	ACADEMIC MEDICAL CENTER	ftp://ftp.ncbi.nlm.nih.gov/genomes/all/GCF/900/012/315/GCF_900012315.1_assembly_GD-0018
GCF_900012395.1	Y	MG_11	PRJNA224116	SAMEA3595201	F	na	Streptococcus suis	Suis	Streptococcus suis	9401240	Contig	2016/07/01	ACADEMIC MEDICAL CENTER	ftp://ftp.ncbi.nlm.nih.gov/genomes/all/GCF/900/012/395/GCF_900012395.1_assembly_9401240
GCF_900013315.1	Y	MG_11	PRJNA224116	SAMEA3595265	F	na	Streptococcus suis	Suis	Streptococcus suis	GD-0117	Contig	2016/07/01	ACADEMIC MEDICAL CENTER	ftp://ftp.ncbi.nlm.nih.gov/genomes/all/GCF/900/013/315/GCF_900013315.1_assembly_GD-0117
GCF_900014835.1	Y	MG_11	PRJNA224116	SAMEA3595267	F	na	Streptococcus suis	Suis	Streptococcus suis	GD-0120	Contig	2016/07/01	ACADEMIC MEDICAL CENTER	ftp://ftp.ncbi.nlm.nih.gov/genomes/all/GCF/900/014/835/GCF_900014835.1_assembly_GD-0120
GCF_900048835.1	Y	MG_11	PRJNA224116	SAMEA1316662	F	na	Streptococcus suis	Suis	Streptococcus suis	LSS60	Contig	2016/02/13	SC	ftp://ftp.ncbi.nlm.nih.gov/genomes/all/GCF/900/048/835/GCF_900048835.1_7114_5_60
GCF_900049345.1	Y	MG_11	PRJNA224116	SAMEA1316544	F	na	Streptococcus suis	Suis	Streptococcus suis	LSS42	Contig	2016/02/13	SC	ftp://ftp.ncbi.nlm.nih.gov/genomes/all/GCF/900/049/345/GCF_900049345.1_7114_5_42
GCF_900049625.1	Y	MG_11	PRJNA224116	SAMEA1316672	F	na	Streptococcus suis	Suis	Streptococcus suis	LSS36	Contig	2016/02/13	SC	ftp://ftp.ncbi.nlm.nih.gov/genomes/all/GCF/900/049/625/GCF_900049625.1_7114_5_36
GCF_900049955.1	Y	MG_11	PRJNA224116	SAMEA1316652	F	na	Streptococcus suis	Suis	Streptococcus suis	LSS75	Contig	2016/02/13	SC	ftp://ftp.ncbi.nlm.nih.gov/genomes/all/GCF/900/049/955/GCF_900049955.1_7114_5_75
GCF_900049965.1	Y	MG_11	PRJNA224116	SAMEA1316612	F	na	Streptococcus suis	Suis	Streptococcus suis	SS1030	Contig	2016/02/13	SC	ftp://ftp.ncbi.nlm.nih.gov/genomes/all/GCF/900/049/965/GCF_900049965.1_7054_7_34
GCF_900050805.1	Y	MG_11	PRJNA224116	SAMEA1316668	F	na	Streptococcus suis	Suis	Streptococcus suis	LSS64	Contig	2016/02/13	SC	ftp://ftp.ncbi.nlm.nih.gov/genomes/all/GCF/900/050/805/GCF_900050805.1_7114_5_64
GCF_900050815.1	Y	MG_11	PRJNA224116	SAMEA1316710	F	na	Streptococcus suis	Suis	Streptococcus suis	LSS65	Contig	2016/02/13	SC	ftp://ftp.ncbi.nlm.nih.gov/genomes/all/GCF/900/050/815/GCF_900050815.1_7114_5_65
GCF_900050835.1	Y	MG_11	PRJNA224116	SAMEA1316554	F	na	Streptococcus suis	Suis	Streptococcus suis	SS1062	Contig	2016/02/13	SC	ftp://ftp.ncbi.nlm.nih.gov/genomes/all/GCF/900/050/835/GCF_900050835.1_7054_7_93
GCF_900051565.1	Y	MG_11	PRJNA224116	SAMEA1316704	F	na	Streptococcus suis	Suis	Streptococcus suis	LSS33	Contig	2016/02/12	SC	ftp://ftp.ncbi.nlm.nih.gov/genomes/all/GCF/900/051/565/GCF_900051565.1_7114_5_33
GCF_900051935.1	Y	MG_11	PRJNA224116	SAMEA1316678	F	na	Streptococcus suis	Suis	Streptococcus suis	LSS35	Contig	2016/02/12	SC	ftp://ftp.ncbi.nlm.nih.gov/genomes/all/GCF/900/051/935/GCF_900051935.1_7114_5_35
GCF_900051945.1	Y	MG_11	PRJNA224116	SAMEA1316523	F	na	Streptococcus suis	Suis	Streptococcus suis	SS1056	Scaffold	2016/02/12	SC	ftp://ftp.ncbi.nlm.nih.gov/genomes/all/GCF/900/051/945/GCF_900051945.1_7054_7_51
GCF_900052235.1	Y	MG_11	PRJNA224116	SAMEA1316647	F	na	Streptococcus suis	Suis	Streptococcus suis	SS1067	Contig	2016/02/13	SC	ftp://ftp.ncbi.nlm.nih.gov/genomes/all/GCF/900/052/235/GCF_900052235.1_7054_7_58
GCF_900052525.1	Y	MG_11	PRJNA224116	SAMEA1316556	F	na	Streptococcus suis	Suis	Streptococcus suis	LSS8	Contig	2016/02/13	SC	ftp://ftp.ncbi.nlm.nih.gov/genomes/all/GCF/900/052/525/GCF_900052525.1_7114_5_8
GCF_900052535.1	Y	MG_11	PRJNA224116	SAMEA1316518	F	na	Streptococcus suis	Suis	Streptococcus suis	SS981	Contig	2016/02/12	SC	ftp://ftp.ncbi.nlm.nih.gov/genomes/all/GCF/900/052/535/GCF_900052535.1_7054_7_64
GCF_900053125.1	Y	MG_11	PRJNA224116	SAMEA1316575	F	na	Streptococcus suis	Suis	Streptococcus suis	LSS54	Contig	2016/02/13	SC	ftp://ftp.ncbi.nlm.nih.gov/genomes/all/GCF/900/053/125/GCF_900053125.1_7114_5_54
GCF_900053135.1	Y	MG_11	PRJNA224116	SAMEA1316560	F	na	Streptococcus suis	Suis	Streptococcus suis	LSS55	Contig	2016/02/13	SC	ftp://ftp.ncbi.nlm.nih.gov/genomes/all/GCF/900/053/135/GCF_900053135.1_7114_5_55
GCF_900053165.1	Y	MG_11	PRJNA224116	SAMEA1316584	F	na	Streptococcus suis	Suis	Streptococcus suis	SS997	Scaffold	2016/02/13	SC	ftp://ftp.ncbi.nlm.nih.gov/genomes/all/GCF/900/053/165/GCF_900053165.1_7054_7_77
GCF_900053595.1	Y	MG_11	PRJNA224116	SAMEA1316701	F	na	Streptococcus suis	Suis	Streptococcus suis	LSS44	Contig	2016/02/13	SC	ftp://ftp.ncbi.nlm.nih.gov/genomes/all/GCF/900/053/595/GCF_900053595.1_7114_5_44
GCF_900054295.1	Y	MG_11	PRJNA224116	SAMEA1316603	F	na	Streptococcus suis	Suis	Streptococcus suis	LOLA-SS002	Contig	2016/02/12	SC	ftp://ftp.ncbi.nlm.nih.gov/genomes/all/GCF/900/054/295/GCF_900054295.1_5749_1_2
GCF_900054535.1	Y	MG_11	PRJNA224116	SAMEA1316589	F	na	Streptococcus suis	Suis	Streptococcus suis	LOLA-SS011	Contig	2016/02/12	SC	ftp://ftp.ncbi.nlm.nih.gov/genomes/all/GCF/900/054/535/GCF_900054535.1_5749_1_11
GCF_900054815.1	Y	MG_11	PRJNA224116	SAMEA1316691	F	na	Streptococcus suis	Suis	Streptococcus suis	SS1012	Contig	2016/02/12	SC	ftp://ftp.ncbi.nlm.nih.gov/genomes/all/GCF/900/054/815/GCF_900054815.1_7054_7_24
GCF_900055105.1	Y	MG_11	PRJNA224116	SAMEA1316615	F	na	Streptococcus suis	Suis	Streptococcus suis	LSS49	Contig	2016/02/13	SC	ftp://ftp.ncbi.nlm.nih.gov/genomes/all/GCF/900/055/105/GCF_900055105.1_7114_5_49
GCF_900055495.1	Y	MG_11	PRJNA224116	SAMEA1316627	F	na	Streptococcus suis	Suis	Streptococcus suis	LSS48	Contig	2016/02/13	SC	ftp://ftp.ncbi.nlm.nih.gov/genomes/all/GCF/900/055/495/GCF_900055495.1_7114_5_48
GCF_900055855.1	Y	MG_11	PRJNA224116	SAMEA1316591	F	na	Streptococcus suis	Suis	Streptococcus suis	LSS70	Contig	2016/02/13	SC	ftp://ftp.ncbi.nlm.nih.gov/genomes/all/GCF/900/055/855/GCF_900055855.1_7114_5_70
GCF_900055865.1	Y	MG_11	PRJNA224116	SAMEA1316646	F	na	Streptococcus suis	Suis	Streptococcus suis	SS993	Scaffold	2016/02/13	SC	ftp://ftp.ncbi.nlm.nih.gov/genomes/all/GCF/900/055/865/GCF_900055865.1_7054_7_73
GCF_900056165.1	Y	MG_11	PRJNA224116	SAMEA1316655	F	na	Streptococcus suis	Suis	Streptococcus suis	LSS23	Contig	2016/02/13	SC	ftp://ftp.ncbi.nlm.nih.gov/genomes/all/GCF/900/056/165/GCF_900056165.1_7114_5_23
GCF_900056485.1	Y	MG_11	PRJNA224116	SAMEA1316694	F	na	Streptococcus suis	Suis	Streptococcus suis	LSS66	Contig	2016/02/13	SC	ftp://ftp.ncbi.nlm.nih.gov/genomes/all/GCF/900/056/485/GCF_900056485.1_7114_5_66
GCF_900056505.1	Y	MG_11	PRJNA224116	SAMEA1316562	F	na	Streptococcus suis	Suis	Streptococcus suis	LSS78	Contig	2016/02/13	SC	ftp://ftp.ncbi.nlm.nih.gov/genomes/all/GCF/900/056/505/GCF_900056505.1_7114_5_78
GCF_900056525.1	Y	MG_11	PRJNA224116	SAMEA1316709	F	na	Streptococcus suis	Suis	Streptococcus suis	LSS82	Contig	2016/02/13	SC	ftp://ftp.ncbi.nlm.nih.gov/genomes/all/GCF/900/056/525/GCF_900056525.1_7114_5_82
GCF_900056565.1	Y	MG_11	PRJNA224116	SAMEA1316685	F	na	Streptococcus suis	Suis	Streptococcus suis	SS986	Scaffold	2016/02/13	SC	ftp://ftp.ncbi.nlm.nih.gov/genomes/all/GCF/900/056/565/GCF_900056565.1_7054_7_68
GCF_900056825.1	Y	MG_11	PRJNA224116	SAMEA1316658	F	na	Streptococcus suis	Suis	Streptococcus suis	LOLA-SS006	Contig	2016/02/13	SC	ftp://ftp.ncbi.nlm.nih.gov/genomes/all/GCF/900/056/825/GCF_900056825.1_5749_1_6
GCF_900056835.1	Y	MG_11	PRJNA224116	SAMEA1316537	F	na	Streptococcus suis	Suis	Streptococcus suis	LSS38	Scaffold	2016/02/13	SC	ftp://ftp.ncbi.nlm.nih.gov/genomes/all/GCF/900/056/835/GCF_900056835.1_7114_5_38
GCF_900056855.1	Y	MG_11	PRJNA224116	SAMEA1316707	F	na	Streptococcus suis	Suis	Streptococcus suis	SS1021	Contig	2016/02/13	SC	ftp://ftp.ncbi.nlm.nih.gov/genomes/all/GCF/900/056/855/GCF_900056855.1_7054_7_84
GCF_900057045.1	Y	MG_11	PRJNA224116	SAMEA1316532	F	na	Streptococcus suis	Suis	Streptococcus suis	LSS80	Contig	2016/02/13	SC	ftp://ftp.ncbi.nlm.nih.gov/genomes/all/GCF/900/057/045/GCF_900057045.1_7114_5_80
GCF_900057055.1	Y	MG_11	PRJNA224116	SAMEA1316674	F	na	Streptococcus suis	Suis	Streptococcus suis	SS1022	Contig	2016/02/12	SC	ftp://ftp.ncbi.nlm.nih.gov/genomes/all/GCF/900/057/055/GCF_900057055.1_7054_7_85
GCF_900057495.1	Y	MG_11	PRJNA224116	SAMEA1316539	F	na	Streptococcus suis	Suis	Streptococcus suis	LSS10	Scaffold	2016/02/13	SC	ftp://ftp.ncbi.nlm.nih.gov/genomes/all/GCF/900/057/495/GCF_900057495.1_7114_5_10
GCF_900057675.1	Y	MG_11	PRJNA224116	SAMEA1316519	F	na	Streptococcus suis	Suis	Streptococcus suis	LSS39	Contig	2016/02/13	SC	ftp://ftp.ncbi.nlm.nih.gov/genomes/all/GCF/900/057/675/GCF_900057675.1_7114_5_39
GCF_900058005.1	Y	MG_11	PRJNA224116	SAMEA1316513	F	na	Streptococcus suis	Suis	Streptococcus suis	LSS81	Contig	2016/02/13	SC	ftp://ftp.ncbi.nlm.nih.gov/genomes/all/GCF/900/058/005/GCF_900058005.1_7114_5_81
GCF_900058065.1	Y	MG_11	PRJNA224116	SAMEA1566185	F	na	Streptococcus suis	Suis	Streptococcus suis	VS3865	Contig	2016/02/13	SC	ftp://ftp.ncbi.nlm.nih.gov/genomes/all/GCF/900/058/065/GCF_900058065.1_8525_5_86
GCF_900058245.1	Y	MG_11	PRJNA224116	SAMEA1316592	F	na	Streptococcus suis	Suis	Streptococcus suis	LSS52	Contig	2016/02/13	SC	ftp://ftp.ncbi.nlm.nih.gov/genomes/all/GCF/900/058/245/GCF_900058245.1_7114_5_52
GCF_900058255.1	Y	MG_11	PRJNA224116	SAMEA1316620	F	na	Streptococcus suis	Suis	Streptococcus suis	LSS59	Contig	2016/02/12	SC	ftp://ftp.ncbi.nlm.nih.gov/genomes/all/GCF/900/058/255/GCF_900058255.1_7114_5_59
GCF_900058475.1	Y	MG_11	PRJNA224116	SAMEA1316543	F	na	Streptococcus suis	Suis	Streptococcus suis	LSS57	Contig	2016/02/13	SC	ftp://ftp.ncbi.nlm.nih.gov/genomes/all/GCF/900/058/475/GCF_900058475.1_7114_5_57
GCF_900058485.1	Y	MG_11	PRJNA224116	SAMEA1316547	F	na	Streptococcus suis	Suis	Streptococcus suis	LSS9	Scaffold	2016/02/13	SC	ftp://ftp.ncbi.nlm.nih.gov/genomes/all/GCF/900/058/485/GCF_900058485.1_7114_5_9
GCF_900058695.1	Y	MG_11	PRJNA224116	SAMEA1316639	F	na	Streptococcus suis	Suis	Streptococcus suis	LSS58	Scaffold	2016/02/13	SC	ftp://ftp.ncbi.nlm.nih.gov/genomes/all/GCF/900/058/695/GCF_900058695.1_7114_5_58
GCF_900058715.1	Y	MG_11	PRJNA224116	SAMEA1316616	F	na	Streptococcus suis	Suis	Streptococcus suis	LSS88	Scaffold	2016/02/13	SC	ftp://ftp.ncbi.nlm.nih.gov/genomes/all/GCF/900/058/715/GCF_900058715.1_7114_5_88
GCF_900058725.1	Y	MG_11	PRJNA224116	SAMEA1316526	F	na	Streptococcus suis	Suis	Streptococcus suis	LSS96	Contig	2016/02/13	SC	ftp://ftp.ncbi.nlm.nih.gov/genomes/all/GCF/900/058/725/GCF_900058725.1_7114_5_96
GCF_900058785.1	Y	MG_11	PRJNA224116	SAMEA1566120	F	na	Streptococcus suis	Suis	Streptococcus suis	FX51_2	Contig	2016/02/12	SC	ftp://ftp.ncbi.nlm.nih.gov/genomes/all/GCF/900/058/785/GCF_900058785.1_8337_6_89
GCF_900059085.1	Y	MG_11	PRJNA224116	SAMEA1316549	F	na	Streptococcus suis	Suis	Streptococcus suis	LSS56	Contig	2016/02/13	SC	ftp://ftp.ncbi.nlm.nih.gov/genomes/all/GCF/900/059/085/GCF_900059085.1_7114_5_56
GCF_900059105.1	Y	MG_11	PRJNA224116	SAMEA1316628	F	na	Streptococcus suis	Suis	Streptococcus suis	LSS89	Contig	2016/02/12	SC	ftp://ftp.ncbi.nlm.nih.gov/genomes/all/GCF/900/059/105/GCF_900059105.1_7114_5_89
GCF_900059415.1	Y	MG_11	PRJNA224116	SAMEA1316512	F	na	Streptococcus suis	Suis	Streptococcus suis	LSS12	Contig	2016/02/13	SC	ftp://ftp.ncbi.nlm.nih.gov/genomes/all/GCF/900/059/415/GCF_900059415.1_7114_5_12
GCF_900059425.1	Y	MG_11	PRJNA224116	SAMEA1316604	F	na	Streptococcus suis	Suis	Streptococcus suis	LSS13	Contig	2016/02/13	SC	ftp://ftp.ncbi.nlm.nih.gov/genomes/all/GCF/900/059/425/GCF_900059425.1_7114_5_13
GCF_900060635.1	Y	MG_11	PRJNA224116	SAMEA1316527	F	na	Streptococcus suis	Suis	Streptococcus suis	LSS11	Contig	2016/02/13	SC	ftp://ftp.ncbi.nlm.nih.gov/genomes/all/GCF/900/060/635/GCF_900060635.1_7114_5_11
GCF_900060645.1	Y	MG_11	PRJNA224116	SAMEA1316534	F	na	Streptococcus suis	Suis	Streptococcus suis	LSS69	Contig	2016/02/13	SC	ftp://ftp.ncbi.nlm.nih.gov/genomes/all/GCF/900/060/645/GCF_900060645.1_7114_5_69
GCF_900061355.1	Y	MG_11	PRJNA224116	SAMEA1316529	F	na	Streptococcus suis	Suis	Streptococcus suis	SS975	Scaffold	2016/02/13	SC	ftp://ftp.ncbi.nlm.nih.gov/genomes/all/GCF/900/061/355/GCF_900061355.1_7054_7_63
GCF_900061375.1	Y	MG_11	PRJNA224116	SAMEA1316550	F	na	Streptococcus suis	Suis	Streptococcus suis	SS985	Scaffold	2016/02/13	SC	ftp://ftp.ncbi.nlm.nih.gov/genomes/all/GCF/900/061/375/GCF_900061375.1_7054_7_67
GCF_900061385.1	Y	MG_11	PRJNA224116	SAMEA1316706	F	na	Streptococcus suis	Suis	Streptococcus suis	SS991	Contig	2016/02/13	SC	ftp://ftp.ncbi.nlm.nih.gov/genomes/all/GCF/900/061/385/GCF_900061385.1_7054_7_71
GCF_900062235.1	Y	MG_11	PRJNA224116	SAMEA1316705	F	na	Streptococcus suis	Suis	Streptococcus suis	LSS18	Scaffold	2016/02/12	SC	ftp://ftp.ncbi.nlm.nih.gov/genomes/all/GCF/900/062/235/GCF_900062235.1_7114_5_18
GCF_900062245.1	Y	MG_11	PRJNA224116	SAMEA1316633	F	na	Streptococcus suis	Suis	Streptococcus suis	LSS2	Contig	2016/02/13	SC	ftp://ftp.ncbi.nlm.nih.gov/genomes/all/GCF/900/062/245/GCF_900062245.1_7114_5_2
GCF_900062265.1	Y	MG_11	PRJNA224116	SAMEA1316602	F	na	Streptococcus suis	Suis	Streptococcus suis	LSS27	Contig	2016/02/12	SC	ftp://ftp.ncbi.nlm.nih.gov/genomes/all/GCF/900/062/265/GCF_900062265.1_7114_5_27
GCF_900062275.1	Y	MG_11	PRJNA224116	SAMEA1316583	F	na	Streptococcus suis	Suis	Streptococcus suis	LSS90	Contig	2016/02/13	SC	ftp://ftp.ncbi.nlm.nih.gov/genomes/all/GCF/900/062/275/GCF_900062275.1_7114_5_90
GCF_900062835.1	Y	MG_11	PRJNA224116	SAMEA1316679	F	na	Streptococcus suis	Suis	Streptococcus suis	LSS99	Scaffold	2016/02/13	SC	ftp://ftp.ncbi.nlm.nih.gov/genomes/all/GCF/900/062/835/GCF_900062835.1_7054_7_3
GCF_900063275.1	Y	MG_11	PRJNA224116	SAMEA1316542	F	na	Streptococcus suis	Suis	Streptococcus suis	SS1053	Contig	2016/02/13	SC	ftp://ftp.ncbi.nlm.nih.gov/genomes/all/GCF/900/063/275/GCF_900063275.1_7054_7_48
GCF_900063555.1	Y	MG_11	PRJNA224116	SAMEA1316545	F	na	Streptococcus suis	Suis	Streptococcus suis	LSS30	Contig	2016/02/13	SC	ftp://ftp.ncbi.nlm.nih.gov/genomes/all/GCF/900/063/555/GCF_900063555.1_7114_5_30
GCF_900063565.1	Y	MG_11	PRJNA224116	SAMEA1316553	F	na	Streptococcus suis	Suis	Streptococcus suis	LSS31	Contig	2016/02/13	SC	ftp://ftp.ncbi.nlm.nih.gov/genomes/all/GCF/900/063/565/GCF_900063565.1_7114_5_31
GCF_900063575.1	Y	MG_11	PRJNA224116	SAMEA1316711	F	na	Streptococcus suis	Suis	Streptococcus suis	LSS32	Scaffold	2016/02/13	SC	ftp://ftp.ncbi.nlm.nih.gov/genomes/all/GCF/900/063/575/GCF_900063575.1_7114_5_32
GCF_900063595.1	Y	MG_11	PRJNA224116	SAMEA1316663	F	na	Streptococcus suis	Suis	Streptococcus suis	LSS37	Contig	2016/02/13	SC	ftp://ftp.ncbi.nlm.nih.gov/genomes/all/GCF/900/063/595/GCF_900063595.1_7114_5_37
GCF_900063605.1	Y	MG_11	PRJNA224116	SAMEA1316657	F	na	Streptococcus suis	Suis	Streptococcus suis	LSS4	Contig	2016/02/12	SC	ftp://ftp.ncbi.nlm.nih.gov/genomes/all/GCF/900/063/605/GCF_900063605.1_7114_5_4
GCF_900064015.1	Y	MG_11	PRJNA224116	SAMEA1316514	F	na	Streptococcus suis	Suis	Streptococcus suis	LSS40	Contig	2016/02/13	SC	ftp://ftp.ncbi.nlm.nih.gov/genomes/all/GCF/900/064/015/GCF_900064015.1_7114_5_40
GCF_900064035.1	Y	MG_11	PRJNA224116	SAMEA1566194	F	na	Streptococcus suis	Suis	Streptococcus suis	EN191	Contig	2016/02/12	SC	ftp://ftp.ncbi.nlm.nih.gov/genomes/all/GCF/900/064/035/GCF_900064035.1_8337_6_63
GCF_900064165.1	Y	MG_11	PRJNA224116	SAMEA1316609	F	na	Streptococcus suis	Suis	Streptococcus suis	LSS92	Contig	2016/02/13	SC	ftp://ftp.ncbi.nlm.nih.gov/genomes/all/GCF/900/064/165/GCF_900064165.1_7114_5_92
GCF_900064295.1	Y	MG_11	PRJNA224116	SAMEA1316533	F	na	Streptococcus suis	Suis	Streptococcus suis	LSS94	Contig	2016/02/13	SC	ftp://ftp.ncbi.nlm.nih.gov/genomes/all/GCF/900/064/295/GCF_900064295.1_7114_5_94
GCF_900064995.1	Y	MG_11	PRJNA224116	SAMEA1316588	F	na	Streptococcus suis	Suis	Streptococcus suis	LSS74	Contig	2016/02/13	SC	ftp://ftp.ncbi.nlm.nih.gov/genomes/all/GCF/900/064/995/GCF_900064995.1_7114_5_74
GCF_900065035.1	Y	MG_11	PRJNA224116	SAMEA1316581	F	na	Streptococcus suis	Suis	Streptococcus suis	SS1051	Contig	2016/02/13	SC	ftp://ftp.ncbi.nlm.nih.gov/genomes/all/GCF/900/065/035/GCF_900065035.1_7054_7_47
GCF_900065075.1	Y	MG_11	PRJNA224116	SAMEA1566170	F	na	Streptococcus suis	Suis	Streptococcus suis	FX230	Contig	2016/02/13	SC	ftp://ftp.ncbi.nlm.nih.gov/genomes/all/GCF/900/065/075/GCF_900065075.1_8525_5_3
GCF_900065235.1	Y	MG_11	PRJNA224116	SAMEA1316594	F	na	Streptococcus suis	Suis	Streptococcus suis	SS1000	Contig	2016/02/13	SC	ftp://ftp.ncbi.nlm.nih.gov/genomes/all/GCF/900/065/235/GCF_900065235.1_7054_7_14
GCF_900065395.1	Y	MG_11	PRJNA224116	SAMEA1316630	F	na	Streptococcus suis	Suis	Streptococcus suis	SS1052	Contig	2016/02/13	SC	ftp://ftp.ncbi.nlm.nih.gov/genomes/all/GCF/900/065/395/GCF_900065395.1_7054_7_91
GCF_900065715.1	Y	MG_11	PRJNA224116	SAMEA1316626	F	na	Streptococcus suis	Suis	Streptococcus suis	LOLA-SS004	Contig	2016/02/13	SC	ftp://ftp.ncbi.nlm.nih.gov/genomes/all/GCF/900/065/715/GCF_900065715.1_5749_1_4
GCF_900065745.1	Y	MG_11	PRJNA224116	SAMEA1316552	F	na	Streptococcus suis	Suis	Streptococcus suis	LSS41	Contig	2016/02/13	SC	ftp://ftp.ncbi.nlm.nih.gov/genomes/all/GCF/900/065/745/GCF_900065745.1_7114_5_41
GCF_000168355.3	Y	MG_11	PRJNA224116	SAMN02469350	F	na	Streptococcus suis	Suis	Streptococcus suis 05HAS68	05HAS68	Complete	2015/05/14	Beijing Institute of Genomics, Chinese Academy of Sciences,	ftp://ftp.ncbi.nlm.nih.gov/genomes/all/GCF/000/168/355/GCF_000168355.3_ASM16835v3
GCF_000440275.1	Y	MG_11	PRJNA224116	SAMN02470634	F	na	Streptococcus suis	Suis	Streptococcus suis 11538	11538	Contig	2013/07/25	National Institute for Communicable Disease Control and Prevention, Chinese Center for Disease Control and Prevention/State Key Laboratory for Infectious Disease Prevention and Control	ftp://ftp.ncbi.nlm.nih.gov/genomes/all/GCF/000/440/275/GCF_000440275.1_version1
GCF_000440295.1	Y	MG_11	PRJNA224116	SAMN02470638	F	na	Streptococcus suis	Suis	Streptococcus suis 12814	12814	Contig	2013/07/25	National Institute for Communicable Disease Control and Prevention, Chinese Center for Disease Control and Prevention/State Key Laboratory for Infectious Disease Prevention and Control	ftp://ftp.ncbi.nlm.nih.gov/genomes/all/GCF/000/440/295/GCF_000440295.1_version1
GCF_000440335.1	Y	MG_11	PRJNA224116	SAMN02470635	F	na	Streptococcus suis	Suis	Streptococcus suis 14636	14636	Contig	2013/07/25	National Institute for Communicable Disease Control and Prevention, Chinese Center for Disease Control and Prevention/State Key Laboratory for Infectious Disease Prevention and Control	ftp://ftp.ncbi.nlm.nih.gov/genomes/all/GCF/000/440/335/GCF_000440335.1_version1
GCF_000440355.1	Y	MG_11	PRJNA224116	SAMN02469544	F	na	Streptococcus suis	Suis	Streptococcus suis 14A	14A	Contig	2013/07/25	National Institute for Communicable Disease Control and Prevention, Chinese Center for Disease Control and Prevention/State Key Laboratory for Infectious Disease Prevention and Control	ftp://ftp.ncbi.nlm.nih.gov/genomes/all/GCF/000/440/355/GCF_000440355.1_version1
GCF_000440375.1	Y	MG_11	PRJNA224116	SAMN02469528	F	na	Streptococcus suis	Suis	Streptococcus suis 161_00P5	161_00P5	Contig	2013/07/25	National Institute for Communicable Disease Control and Prevention, Chinese Center for Disease Control and Prevention/State Key Laboratory for Infectious Disease Prevention and Control	ftp://ftp.ncbi.nlm.nih.gov/genomes/all/GCF/000/440/375/GCF_000440375.1_version1
GCF_000440395.1	Y	MG_11	PRJNA224116	SAMN02470632	F	na	Streptococcus suis	Suis	Streptococcus suis 22083	22083	Contig	2013/07/25	National Institute for Communicable Disease Control and Prevention, Chinese Center for Disease Control and Prevention/State Key Laboratory for Infectious Disease Prevention and Control	ftp://ftp.ncbi.nlm.nih.gov/genomes/all/GCF/000/440/395/GCF_000440395.1_version1
GCF_000440415.1	Y	MG_11	PRJNA224116	SAMN02469521	F	na	Streptococcus suis	Suis	Streptococcus suis 2524	2524	Contig	2013/07/25	National Institute for Communicable Disease Control and Prevention, Chinese Center for Disease Control and Prevention/State Key Laboratory for Infectious Disease Prevention and Control	ftp://ftp.ncbi.nlm.nih.gov/genomes/all/GCF/000/440/415/GCF_000440415.1_version1
GCF_000440435.1	Y	MG_11	PRJNA224116	SAMN02469522	F	na	Streptococcus suis	Suis	Streptococcus suis 2651	2651	Contig	2013/07/25	National Institute for Communicable Disease Control and Prevention, Chinese Center for Disease Control and Prevention/State Key Laboratory for Infectious Disease Prevention and Control	ftp://ftp.ncbi.nlm.nih.gov/genomes/all/GCF/000/440/435/GCF_000440435.1_version1
GCF_000440455.1	Y	MG_11	PRJNA224116	SAMN02469550	F	na	Streptococcus suis	Suis	Streptococcus suis 2726	2726	Contig	2013/07/25	National Institute for Communicable Disease Control and Prevention, Chinese Center for Disease Control and Prevention/State Key Laboratory for Infectious Disease Prevention and Control	ftp://ftp.ncbi.nlm.nih.gov/genomes/all/GCF/000/440/455/GCF_000440455.1_version1
GCF_000440855.1	Y	MG_11	PRJNA224116	SAMN02469539	F	na	Streptococcus suis	Suis	Streptococcus suis 42A	42A	Contig	2013/07/25	National Institute for Communicable Disease Control and Prevention, Chinese Center for Disease Control and Prevention/State Key Laboratory for Infectious Disease Prevention and Control	ftp://ftp.ncbi.nlm.nih.gov/genomes/all/GCF/000/440/855/GCF_000440855.1_version1
GCF_000440475.1	Y	MG_11	PRJNA224116	SAMN02469534	F	na	Streptococcus suis	Suis	Streptococcus suis 4417	4417	Contig	2013/07/25	National Institute for Communicable Disease Control and Prevention, Chinese Center for Disease Control and Prevention/State Key Laboratory for Infectious Disease Prevention and Control	ftp://ftp.ncbi.nlm.nih.gov/genomes/all/GCF/000/440/475/GCF_000440475.1_version1
GCF_000732355.1	Y	MG_11	PRJNA224116	SAMN02905150	F	na	Streptococcus suis	Suis	Streptococcus suis 6407	6407	Complete	2014/07/22	China Animal Health and Epidemiology Center	ftp://ftp.ncbi.nlm.nih.gov/genomes/all/GCF/000/732/355/GCF_000732355.1_ASM73235v1
GCF_000440535.1	Y	MG_11	PRJNA224116	SAMN02469536	F	na	Streptococcus suis	Suis	Streptococcus suis 8074	8074	Contig	2013/07/25	National Institute for Communicable Disease Control and Prevention, Chinese Center for Disease Control and Prevention/State Key Laboratory for Infectious Disease Prevention and Control	ftp://ftp.ncbi.nlm.nih.gov/genomes/all/GCF/000/440/535/GCF_000440535.1_version1
GCF_000440575.1	Y	MG_11	PRJNA224116	SAMN02469523	F	na	Streptococcus suis	Suis	Streptococcus suis 8830	8830	Contig	2013/07/25	National Institute for Communicable Disease Control and Prevention, Chinese Center for Disease Control and Prevention/State Key Laboratory for Infectious Disease Prevention and Control	ftp://ftp.ncbi.nlm.nih.gov/genomes/all/GCF/000/440/575/GCF_000440575.1_version1
GCF_000440895.1	Y	MG_11	PRJNA224116	SAMN02469526	F	na	Streptococcus suis	Suis	Streptococcus suis 88-5299A	88-5299A	Contig	2013/07/25	National Institute for Communicable Disease Control and Prevention, Chinese Center for Disease Control and Prevention/State Key Laboratory for Infectious Disease Prevention and Control	ftp://ftp.ncbi.nlm.nih.gov/genomes/all/GCF/000/440/895/GCF_000440895.1_version1
GCF_000167375.1	Y	MG_11	PRJNA224116	SAMN02441756	F	na	Streptococcus suis	Suis	Streptococcus suis 89/1591	89/1591	Contig	2009/02/20	DOE Joint Genome Institute	ftp://ftp.ncbi.nlm.nih.gov/genomes/all/GCF/000/167/375/GCF_000167375.1_ASM16737v1
GCF_000440615.1	Y	MG_11	PRJNA224116	SAMN02469552	F	na	Streptococcus suis	Suis	Streptococcus suis 89-2479	89-2479	Contig	2013/07/25	National Institute for Communicable Disease Control and Prevention, Chinese Center for Disease Control and Prevention/State Key Laboratory for Infectious Disease Prevention and Control	ftp://ftp.ncbi.nlm.nih.gov/genomes/all/GCF/000/440/615/GCF_000440615.1_version1
GCF_000440635.1	Y	MG_11	PRJNA224116	SAMN02469529	F	na	Streptococcus suis	Suis	Streptococcus suis 89-3576-3	89-3576-3	Contig	2013/07/25	National Institute for Communicable Disease Control and Prevention, Chinese Center for Disease Control and Prevention/State Key Laboratory for Infectious Disease Prevention and Control	ftp://ftp.ncbi.nlm.nih.gov/genomes/all/GCF/000/440/635/GCF_000440635.1_version1
GCF_000440675.1	Y	MG_11	PRJNA224116	SAMN02469554	F	na	Streptococcus suis	Suis	Streptococcus suis 89-5259	89-5259	Contig	2013/07/25	National Institute for Communicable Disease Control and Prevention, Chinese Center for Disease Control and Prevention/State Key Laboratory for Infectious Disease Prevention and Control	ftp://ftp.ncbi.nlm.nih.gov/genomes/all/GCF/000/440/675/GCF_000440675.1_version1
GCF_000440915.1	Y	MG_11	PRJNA224116	SAMN02469545	F	na	Streptococcus suis	Suis	Streptococcus suis 89-590	89-590	Contig	2013/07/25	National Institute for Communicable Disease Control and Prevention, Chinese Center for Disease Control and Prevention/State Key Laboratory for Infectious Disease Prevention and Control	ftp://ftp.ncbi.nlm.nih.gov/genomes/all/GCF/000/440/915/GCF_000440915.1_version1
GCF_000440695.1	Y	MG_11	PRJNA224116	SAMN02469525	F	na	Streptococcus suis	Suis	Streptococcus suis 92-1191	92-1191	Contig	2013/07/25	National Institute for Communicable Disease Control and Prevention, Chinese Center for Disease Control and Prevention/State Key Laboratory for Infectious Disease Prevention and Control	ftp://ftp.ncbi.nlm.nih.gov/genomes/all/GCF/000/440/695/GCF_000440695.1_version1
GCF_000440715.1	Y	MG_11	PRJNA224116	SAMN02469555	F	na	Streptococcus suis	Suis	Streptococcus suis 92-1400	92-1400	Contig	2013/07/25	National Institute for Communicable Disease Control and Prevention, Chinese Center for Disease Control and Prevention/State Key Laboratory for Infectious Disease Prevention and Control	ftp://ftp.ncbi.nlm.nih.gov/genomes/all/GCF/000/440/715/GCF_000440715.1_version1
GCF_000440735.1	Y	MG_11	PRJNA224116	SAMN02469561	F	na	Streptococcus suis	Suis	Streptococcus suis 92-4172	92-4172	Contig	2013/07/25	National Institute for Communicable Disease Control and Prevention, Chinese Center for Disease Control and Prevention/State Key Laboratory for Infectious Disease Prevention and Control	ftp://ftp.ncbi.nlm.nih.gov/genomes/all/GCF/000/440/735/GCF_000440735.1_version1
GCF_000440755.1	Y	MG_11	PRJNA224116	SAMN02469562	F	na	Streptococcus suis	Suis	Streptococcus suis 93A	93A	Contig	2013/07/25	National Institute for Communicable Disease Control and Prevention, Chinese Center for Disease Control and Prevention/State Key Laboratory for Infectious Disease Prevention and Control	ftp://ftp.ncbi.nlm.nih.gov/genomes/all/GCF/000/440/755/GCF_000440755.1_version1
GCF_000233575.1	Y	MG_11	PRJNA224116	SAMN02603318	F	na	Streptococcus suis	Suis	Streptococcus suis A7	A7	Complete	2011/11/01	Huazhong Agricultural University	ftp://ftp.ncbi.nlm.nih.gov/genomes/all/GCF/000/233/575/GCF_000233575.1_ASM23357v1
GCF_000026745.1	Y	MG_11	PRJNA59321	SAMEA2272697	F	reference genome	Streptococcus suis	Suis	Streptococcus suis BM407	BM407	Complete	2009/07/07	The Wellcome Trust Sanger Institute	ftp://ftp.ncbi.nlm.nih.gov/genomes/all/GCF/000/026/745/GCF_000026745.1_ASM2674v1
GCF_000231905.1	Y	MG_11	PRJNA224116	SAMN02603322	F	na	Streptococcus suis	Suis	Streptococcus suis D12	D12	Complete	2011/10/25	Huazhong Agricultural University	ftp://ftp.ncbi.nlm.nih.gov/genomes/all/GCF/000/231/905/GCF_000231905.1_ASM23190v1
GCF_000231885.1	Y	MG_11	PRJNA224116	SAMN02603321	F	na	Streptococcus suis	Suis	Streptococcus suis D9	D9	Complete	2011/10/25	Huazhong Agricultural University	ftp://ftp.ncbi.nlm.nih.gov/genomes/all/GCF/000/231/885/GCF_000231885.1_ASM23188v1
GCF_000018185.1	Y	MG_11	PRJNA224116	SAMN02603644	F	na	Streptococcus suis	Suis	Streptococcus suis GZ1	GZ1	Complete	2010/03/30	National Institute for Communicable Disease Control and Prevention, Chinese Center for Disease Control and Prevention	ftp://ftp.ncbi.nlm.nih.gov/genomes/all/GCF/000/018/185/GCF_000018185.1_ASM1818v1
GCF_000186405.1	Y	MG_11	PRJNA224116	SAMN02603326	F	na	Streptococcus suis	Suis	Streptococcus suis JS14	JS14	Complete	2011/01/20	Huazhong Agricultural University, Wuhan, China	ftp://ftp.ncbi.nlm.nih.gov/genomes/all/GCF/000/186/405/GCF_000186405.1_ASM18640v1
GCF_000440835.1	Y	MG_11	PRJNA224116	SAMN02469563	F	na	Streptococcus suis	Suis	Streptococcus suis NCTC 10446	NCTC 10446	Contig	2013/07/25	National Institute for Communicable Disease Control and Prevention, Chinese Center for Disease Control and Prevention/State Key Laboratory for Infectious Disease Prevention and Control	ftp://ftp.ncbi.nlm.nih.gov/genomes/all/GCF/000/440/835/GCF_000440835.1_version1
GCF_000440775.1	Y	MG_11	PRJNA224116	SAMN02469538	F	na	Streptococcus suis	Suis	Streptococcus suis NT77	NT77	Contig	2013/07/25	National Institute for Communicable Disease Control and Prevention, Chinese Center for Disease Control and Prevention/State Key Laboratory for Infectious Disease Prevention and Control	ftp://ftp.ncbi.nlm.nih.gov/genomes/all/GCF/000/440/775/GCF_000440775.1_version1
GCF_000231325.1	Y	MG_11	PRJNA224116	SAMN02469902	F	na	Streptococcus suis	Suis	Streptococcus suis R61	R61	Contig	2011/10/21	Huazhong Agricultural University	ftp://ftp.ncbi.nlm.nih.gov/genomes/all/GCF/000/231/325/GCF_000231325.1_ASM23132v2
GCF_000440815.1	Y	MG_11	PRJNA224116	SAMN02469504	F	na	Streptococcus suis	Suis	Streptococcus suis RC1	RC1	Contig	2013/07/25	National Institute for Communicable Disease Control and Prevention, Chinese Center for Disease Control and Prevention/State Key Laboratory for Infectious Disease Prevention and Control	ftp://ftp.ncbi.nlm.nih.gov/genomes/all/GCF/000/440/815/GCF_000440815.1_version1
GCF_000294495.1	Y	MG_11	PRJNA224116	SAMN02604110	F	na	Streptococcus suis	Suis	Streptococcus suis S735	S735	Complete	2012/09/04	Universite Laval	ftp://ftp.ncbi.nlm.nih.gov/genomes/all/GCF/000/294/495/GCF_000294495.1_ASM29449v1
GCF_000026725.1	Y	MG_11	PRJNA224116	SAMEA2272312	F	na	Streptococcus suis	Suis	Streptococcus suis SC84	SC84	Complete	2009/07/07	Sanger Institute	ftp://ftp.ncbi.nlm.nih.gov/genomes/all/GCF/000/026/725/GCF_000026725.1_ASM2672v1
GCF_000231865.1	Y	MG_11	PRJNA224116	SAMN02603320	F	na	Streptococcus suis	Suis	Streptococcus suis SS12	SS12	Complete	2011/10/25	Huazhong Agricultural University	ftp://ftp.ncbi.nlm.nih.gov/genomes/all/GCF/000/231/865/GCF_000231865.1_ASM23186v1
GCF_000231925.1	Y	MG_11	PRJNA224116	SAMN02603323	F	na	Streptococcus suis	Suis	Streptococcus suis ST1	ST1	Complete	2011/10/25	Huazhong Agricultural University	ftp://ftp.ncbi.nlm.nih.gov/genomes/all/GCF/000/231/925/GCF_000231925.1_ASM23192v1
GCF_000204625.1	Y	MG_11	PRJNA224116	SAMN02603319	F	na	Streptococcus suis	Suis	Streptococcus suis ST3	ST3	Complete	2011/04/19	Huazhong Agricultural University	ftp://ftp.ncbi.nlm.nih.gov/genomes/all/GCF/000/204/625/GCF_000204625.1_ASM20462v1
GCF_000494895.1	Y	MG_11	PRJNA224116	SAMN02603633	F	na	Streptococcus suis	Suis	Streptococcus suis T15	T15	Complete	2013/11/01	Nanjing Agricultural University	ftp://ftp.ncbi.nlm.nih.gov/genomes/all/GCF/000/494/895/GCF_000494895.1_ASM49489v1
GCF_000390245.1	Y	MG_11	PRJNA224116	SAMN02603120	F	na	Streptococcus suis	Suis	Streptococcus suis TL13	TL13	Complete	2013/05/13	China animal health and epidemiology center	ftp://ftp.ncbi.nlm.nih.gov/genomes/all/GCF/000/390/245/GCF_000390245.1_ASM39024v1
GCF_000441075.1	Y	MG_11	PRJNA224116	SAMN02469530	F	na	Streptococcus suis	Suis	Streptococcus suis YS1	YS1	Contig	2013/07/25	National Institute for Communicable Disease Control and Prevention, Chinese Center for Disease Control and Prevention/State Key Laboratory for Infectious Disease Prevention and Control	ftp://ftp.ncbi.nlm.nih.gov/genomes/all/GCF/000/441/075/GCF_000441075.1_version1
GCF_000440955.1	Y	MG_11	PRJNA224116	SAMN02469507	F	na	Streptococcus suis	Suis	Streptococcus suis YS10	YS10	Contig	2013/07/25	National Institute for Communicable Disease Control and Prevention, Chinese Center for Disease Control and Prevention/State Key Laboratory for Infectious Disease Prevention and Control	ftp://ftp.ncbi.nlm.nih.gov/genomes/all/GCF/000/440/955/GCF_000440955.1_version1
GCF_002759725.1	Y	MG_11	PRJNA224116	SAMN07176418	F	na	Streptococcus suis	Suis	Streptococcus suis YS104	YS104	Contig	2017/11/07	National Institute for Communicable Disease Control and Prevention, Chinese Center for Disease Control and Prevention/State Key Laboratory for Infectious Disease Prevention and Control	ftp://ftp.ncbi.nlm.nih.gov/genomes/all/GCF/002/759/725/GCF_002759725.1_ASM275972v1
GCF_002759735.1	Y	MG_11	PRJNA224116	SAMN07176417	F	na	Streptococcus suis	Suis	Streptococcus suis YS106	YS106	Contig	2017/11/07	National Institute for Communicable Disease Control and Prevention, Chinese Center for Disease Control and Prevention/State Key Laboratory for Infectious Disease Prevention and Control	ftp://ftp.ncbi.nlm.nih.gov/genomes/all/GCF/002/759/735/GCF_002759735.1_ASM275973v1
GCF_002760055.1	Y	MG_11	PRJNA224116	SAMN07176416	F	na	Streptococcus suis	Suis	Streptococcus suis YS107	YS107	Contig	2017/11/07	National Institute for Communicable Disease Control and Prevention, Chinese Center for Disease Control and Prevention/State Key Laboratory for Infectious Disease Prevention and Control	ftp://ftp.ncbi.nlm.nih.gov/genomes/all/GCF/002/760/055/GCF_002760055.1_ASM276005v1
GCF_002760135.1	Y	MG_11	PRJNA224116	SAMN07176412	F	na	Streptococcus suis	Suis	Streptococcus suis YS117	YS117	Contig	2017/11/07	National Institute for Communicable Disease Control and Prevention, Chinese Center for Disease Control and Prevention/State Key Laboratory for Infectious Disease Prevention and Control	ftp://ftp.ncbi.nlm.nih.gov/genomes/all/GCF/002/760/135/GCF_002760135.1_ASM276013v1
GCF_000440975.1	Y	MG_11	PRJNA224116	SAMN02469508	F	na	Streptococcus suis	Suis	Streptococcus suis YS12	YS12	Contig	2013/07/25	National Institute for Communicable Disease Control and Prevention, Chinese Center for Disease Control and Prevention/State Key Laboratory for Infectious Disease Prevention and Control	ftp://ftp.ncbi.nlm.nih.gov/genomes/all/GCF/000/440/975/GCF_000440975.1_version1
GCF_002759675.1	Y	MG_11	PRJNA224116	SAMN07176411	F	na	Streptococcus suis	Suis	Streptococcus suis YS122	YS122	Contig	2017/11/07	National Institute for Communicable Disease Control and Prevention, Chinese Center for Disease Control and Prevention/State Key Laboratory for Infectious Disease Prevention and Control	ftp://ftp.ncbi.nlm.nih.gov/genomes/all/GCF/002/759/675/GCF_002759675.1_ASM275967v1
GCF_002760195.1	Y	MG_11	PRJNA224116	SAMN07176409	F	na	Streptococcus suis	Suis	Streptococcus suis YS131	YS131	Contig	2017/11/07	National Institute for Communicable Disease Control and Prevention, Chinese Center for Disease Control and Prevention/State Key Laboratory for Infectious Disease Prevention and Control	ftp://ftp.ncbi.nlm.nih.gov/genomes/all/GCF/002/760/195/GCF_002760195.1_ASM276019v1
GCF_000440995.1	Y	MG_11	PRJNA224116	SAMN02469540	F	na	Streptococcus suis	Suis	Streptococcus suis YS14	YS14	Contig	2013/07/25	National Institute for Communicable Disease Control and Prevention, Chinese Center for Disease Control and Prevention/State Key Laboratory for Infectious Disease Prevention and Control	ftp://ftp.ncbi.nlm.nih.gov/genomes/all/GCF/000/440/995/GCF_000440995.1_version1
GCF_002760225.1	Y	MG_11	PRJNA224116	SAMN07176407	F	na	Streptococcus suis	Suis	Streptococcus suis YS146	YS146	Contig	2017/11/07	National Institute for Communicable Disease Control and Prevention, Chinese Center for Disease Control and Prevention/State Key Laboratory for Infectious Disease Prevention and Control	ftp://ftp.ncbi.nlm.nih.gov/genomes/all/GCF/002/760/225/GCF_002760225.1_ASM276022v1
GCF_000441015.1	Y	MG_11	PRJNA224116	SAMN02469509	F	na	Streptococcus suis	Suis	Streptococcus suis YS16	YS16	Contig	2013/07/25	National Institute for Communicable Disease Control and Prevention, Chinese Center for Disease Control and Prevention/State Key Laboratory for Infectious Disease Prevention and Control	ftp://ftp.ncbi.nlm.nih.gov/genomes/all/GCF/000/441/015/GCF_000441015.1_version1
GCF_002760245.1	Y	MG_11	PRJNA224116	SAMN07176405	F	na	Streptococcus suis	Suis	Streptococcus suis YS161	YS161	Contig	2017/11/07	National Institute for Communicable Disease Control and Prevention, Chinese Center for Disease Control and Prevention/State Key Laboratory for Infectious Disease Prevention and Control	ftp://ftp.ncbi.nlm.nih.gov/genomes/all/GCF/002/760/245/GCF_002760245.1_ASM276024v1
GCF_000441035.1	Y	MG_11	PRJNA224116	SAMN02469556	F	na	Streptococcus suis	Suis	Streptococcus suis YS17	YS17	Contig	2013/07/25	National Institute for Communicable Disease Control and Prevention, Chinese Center for Disease Control and Prevention/State Key Laboratory for Infectious Disease Prevention and Control	ftp://ftp.ncbi.nlm.nih.gov/genomes/all/GCF/000/441/035/GCF_000441035.1_version1
GCF_000441095.1	Y	MG_11	PRJNA224116	SAMN02469541	F	na	Streptococcus suis	Suis	Streptococcus suis YS21	YS21	Contig	2013/07/25	National Institute for Communicable Disease Control and Prevention, Chinese Center for Disease Control and Prevention/State Key Laboratory for Infectious Disease Prevention and Control	ftp://ftp.ncbi.nlm.nih.gov/genomes/all/GCF/000/441/095/GCF_000441095.1_version1
GCF_000441115.1	Y	MG_11	PRJNA224116	SAMN02469510	F	na	Streptococcus suis	Suis	Streptococcus suis YS23	YS23	Contig	2013/07/25	National Institute for Communicable Disease Control and Prevention, Chinese Center for Disease Control and Prevention/State Key Laboratory for Infectious Disease Prevention and Control	ftp://ftp.ncbi.nlm.nih.gov/genomes/all/GCF/000/441/115/GCF_000441115.1_version1
GCF_000441135.1	Y	MG_11	PRJNA224116	SAMN02469511	F	na	Streptococcus suis	Suis	Streptococcus suis YS24	YS24	Contig	2013/07/25	National Institute for Communicable Disease Control and Prevention, Chinese Center for Disease Control and Prevention/State Key Laboratory for Infectious Disease Prevention and Control	ftp://ftp.ncbi.nlm.nih.gov/genomes/all/GCF/000/441/135/GCF_000441135.1_version1
GCF_000441155.1	Y	MG_11	PRJNA224116	SAMN02469512	F	na	Streptococcus suis	Suis	Streptococcus suis YS27	YS27	Contig	2013/07/25	National Institute for Communicable Disease Control and Prevention, Chinese Center for Disease Control and Prevention/State Key Laboratory for Infectious Disease Prevention and Control	ftp://ftp.ncbi.nlm.nih.gov/genomes/all/GCF/000/441/155/GCF_000441155.1_version1
GCF_000441255.1	Y	MG_11	PRJNA224116	SAMN02469565	F	na	Streptococcus suis	Suis	Streptococcus suis YS3	YS3	Contig	2013/07/25	National Institute for Communicable Disease Control and Prevention, Chinese Center for Disease Control and Prevention/State Key Laboratory for Infectious Disease Prevention and Control	ftp://ftp.ncbi.nlm.nih.gov/genomes/all/GCF/000/441/255/GCF_000441255.1_version1
GCF_000441175.1	Y	MG_11	PRJNA224116	SAMN02469564	F	na	Streptococcus suis	Suis	Streptococcus suis YS31	YS31	Contig	2013/07/25	National Institute for Communicable Disease Control and Prevention, Chinese Center for Disease Control and Prevention/State Key Laboratory for Infectious Disease Prevention and Control	ftp://ftp.ncbi.nlm.nih.gov/genomes/all/GCF/000/441/175/GCF_000441175.1_version1
GCF_000441195.1	Y	MG_11	PRJNA224116	SAMN02469513	F	na	Streptococcus suis	Suis	Streptococcus suis YS34	YS34	Contig	2013/07/25	National Institute for Communicable Disease Control and Prevention, Chinese Center for Disease Control and Prevention/State Key Laboratory for Infectious Disease Prevention and Control	ftp://ftp.ncbi.nlm.nih.gov/genomes/all/GCF/000/441/195/GCF_000441195.1_version1
GCF_000441215.1	Y	MG_11	PRJNA224116	SAMN02469514	F	na	Streptococcus suis	Suis	Streptococcus suis YS35	YS35	Contig	2013/07/25	National Institute for Communicable Disease Control and Prevention, Chinese Center for Disease Control and Prevention/State Key Laboratory for Infectious Disease Prevention and Control	ftp://ftp.ncbi.nlm.nih.gov/genomes/all/GCF/000/441/215/GCF_000441215.1_version1
GCF_000441235.1	Y	MG_11	PRJNA224116	SAMN02469527	F	na	Streptococcus suis	Suis	Streptococcus suis YS39	YS39	Contig	2013/07/25	National Institute for Communicable Disease Control and Prevention, Chinese Center for Disease Control and Prevention/State Key Laboratory for Infectious Disease Prevention and Control	ftp://ftp.ncbi.nlm.nih.gov/genomes/all/GCF/000/441/235/GCF_000441235.1_version1
GCF_000441335.1	Y	MG_11	PRJNA224116	SAMN02469516	F	na	Streptococcus suis	Suis	Streptococcus suis YS4	YS4	Contig	2013/07/25	National Institute for Communicable Disease Control and Prevention, Chinese Center for Disease Control and Prevention/State Key Laboratory for Infectious Disease Prevention and Control	ftp://ftp.ncbi.nlm.nih.gov/genomes/all/GCF/000/441/335/GCF_000441335.1_version1
GCF_000441275.1	Y	MG_11	PRJNA224116	SAMN02469546	F	na	Streptococcus suis	Suis	Streptococcus suis YS43	YS43	Contig	2013/07/25	National Institute for Communicable Disease Control and Prevention, Chinese Center for Disease Control and Prevention/State Key Laboratory for Infectious Disease Prevention and Control	ftp://ftp.ncbi.nlm.nih.gov/genomes/all/GCF/000/441/275/GCF_000441275.1_version1
GCF_000441295.1	Y	MG_11	PRJNA224116	SAMN02469515	F	na	Streptococcus suis	Suis	Streptococcus suis YS44	YS44	Contig	2013/07/25	National Institute for Communicable Disease Control and Prevention, Chinese Center for Disease Control and Prevention/State Key Laboratory for Infectious Disease Prevention and Control	ftp://ftp.ncbi.nlm.nih.gov/genomes/all/GCF/000/441/295/GCF_000441295.1_version1
GCF_000441315.1	Y	MG_11	PRJNA224116	SAMN02469547	F	na	Streptococcus suis	Suis	Streptococcus suis YS46	YS46	Contig	2013/07/25	National Institute for Communicable Disease Control and Prevention, Chinese Center for Disease Control and Prevention/State Key Laboratory for Infectious Disease Prevention and Control	ftp://ftp.ncbi.nlm.nih.gov/genomes/all/GCF/000/441/315/GCF_000441315.1_version1
GCF_000440075.1	Y	MG_11	PRJNA224116	SAMN02469566	F	na	Streptococcus suis	Suis	Streptococcus suis YS49	YS49	Contig	2013/07/25	National Institute for Communicable Disease Control and Prevention, Chinese Center for Disease Control and Prevention/State Key Laboratory for Infectious Disease Prevention and Control	ftp://ftp.ncbi.nlm.nih.gov/genomes/all/GCF/000/440/075/GCF_000440075.1_version1
GCF_000441355.1	Y	MG_11	PRJNA224116	SAMN02469519	F	na	Streptococcus suis	Suis	Streptococcus suis YS50	YS50	Contig	2013/07/25	National Institute for Communicable Disease Control and Prevention, Chinese Center for Disease Control and Prevention/State Key Laboratory for Infectious Disease Prevention and Control	ftp://ftp.ncbi.nlm.nih.gov/genomes/all/GCF/000/441/355/GCF_000441355.1_version1
GCF_000440095.1	Y	MG_11	PRJNA224116	SAMN02469559	F	na	Streptococcus suis	Suis	Streptococcus suis YS54	YS54	Contig	2013/07/25	National Institute for Communicable Disease Control and Prevention, Chinese Center for Disease Control and Prevention/State Key Laboratory for Infectious Disease Prevention and Control	ftp://ftp.ncbi.nlm.nih.gov/genomes/all/GCF/000/440/095/GCF_000440095.1_version1
GCF_000440135.1	Y	MG_11	PRJNA224116	SAMN02469548	F	na	Streptococcus suis	Suis	Streptococcus suis YS57	YS57	Contig	2013/07/25	National Institute for Communicable Disease Control and Prevention, Chinese Center for Disease Control and Prevention/State Key Laboratory for Infectious Disease Prevention and Control	ftp://ftp.ncbi.nlm.nih.gov/genomes/all/GCF/000/440/135/GCF_000440135.1_version1
GCF_000441395.1	Y	MG_11	PRJNA224116	SAMN02469531	F	na	Streptococcus suis	Suis	Streptococcus suis YS59	YS59	Contig	2013/07/25	National Institute for Communicable Disease Control and Prevention, Chinese Center for Disease Control and Prevention/State Key Laboratory for Infectious Disease Prevention and Control	ftp://ftp.ncbi.nlm.nih.gov/genomes/all/GCF/000/441/395/GCF_000441395.1_version1
GCF_000441415.1	Y	MG_11	PRJNA224116	SAMN02469543	F	na	Streptococcus suis	Suis	Streptococcus suis YS64	YS64	Contig	2013/07/25	National Institute for Communicable Disease Control and Prevention, Chinese Center for Disease Control and Prevention/State Key Laboratory for Infectious Disease Prevention and Control	ftp://ftp.ncbi.nlm.nih.gov/genomes/all/GCF/000/441/415/GCF_000441415.1_version1
GCF_000441435.1	Y	MG_11	PRJNA224116	SAMN02469560	F	na	Streptococcus suis	Suis	Streptococcus suis YS66	YS66	Contig	2013/07/25	National Institute for Communicable Disease Control and Prevention, Chinese Center for Disease Control and Prevention/State Key Laboratory for Infectious Disease Prevention and Control	ftp://ftp.ncbi.nlm.nih.gov/genomes/all/GCF/000/441/435/GCF_000441435.1_version1
GCF_000441455.1	Y	MG_11	PRJNA224116	SAMN02469517	F	na	Streptococcus suis	Suis	Streptococcus suis YS67	YS67	Contig	2013/07/25	National Institute for Communicable Disease Control and Prevention, Chinese Center for Disease Control and Prevention/State Key Laboratory for Infectious Disease Prevention and Control	ftp://ftp.ncbi.nlm.nih.gov/genomes/all/GCF/000/441/455/GCF_000441455.1_version1
GCF_000441495.1	Y	MG_11	PRJNA224116	SAMN02469533	F	na	Streptococcus suis	Suis	Streptococcus suis YS7	YS7	Contig	2013/07/25	National Institute for Communicable Disease Control and Prevention, Chinese Center for Disease Control and Prevention/State Key Laboratory for Infectious Disease Prevention and Control	ftp://ftp.ncbi.nlm.nih.gov/genomes/all/GCF/000/441/495/GCF_000441495.1_version1
GCF_000440175.1	Y	MG_11	PRJNA224116	SAMN02469532	F	na	Streptococcus suis	Suis	Streptococcus suis YS72	YS72	Contig	2013/07/25	National Institute for Communicable Disease Control and Prevention, Chinese Center for Disease Control and Prevention/State Key Laboratory for Infectious Disease Prevention and Control	ftp://ftp.ncbi.nlm.nih.gov/genomes/all/GCF/000/440/175/GCF_000440175.1_version1
GCF_000440195.1	Y	MG_11	PRJNA224116	SAMN02469549	F	na	Streptococcus suis	Suis	Streptococcus suis YS74	YS74	Contig	2013/07/25	National Institute for Communicable Disease Control and Prevention, Chinese Center for Disease Control and Prevention/State Key Laboratory for Infectious Disease Prevention and Control	ftp://ftp.ncbi.nlm.nih.gov/genomes/all/GCF/000/440/195/GCF_000440195.1_version1
GCF_000441475.1	Y	MG_11	PRJNA224116	SAMN02469520	F	na	Streptococcus suis	Suis	Streptococcus suis YS77	YS77	Contig	2013/07/25	National Institute for Communicable Disease Control and Prevention, Chinese Center for Disease Control and Prevention/State Key Laboratory for Infectious Disease Prevention and Control	ftp://ftp.ncbi.nlm.nih.gov/genomes/all/GCF/000/441/475/GCF_000441475.1_version1
GCF_002760075.1	Y	MG_11	PRJNA224116	SAMN07176421	F	na	Streptococcus suis	Suis	Streptococcus suis YS85	YS85	Contig	2017/11/07	National Institute for Communicable Disease Control and Prevention, Chinese Center for Disease Control and Prevention/State Key Laboratory for Infectious Disease Prevention and Control	ftp://ftp.ncbi.nlm.nih.gov/genomes/all/GCF/002/760/075/GCF_002760075.1_ASM276007v1
GCF_002759625.1	Y	MG_11	PRJNA224116	SAMN07176420	F	na	Streptococcus suis	Suis	Streptococcus suis YS87	YS87	Contig	2017/11/07	National Institute for Communicable Disease Control and Prevention, Chinese Center for Disease Control and Prevention/State Key Laboratory for Infectious Disease Prevention and Control	ftp://ftp.ncbi.nlm.nih.gov/genomes/all/GCF/002/759/625/GCF_002759625.1_ASM275962v1
GCF_002759695.1	Y	MG_11	PRJNA224116	SAMN07176419	F	na	Streptococcus suis	Suis	Streptococcus suis YS93	YS93	Contig	2017/11/07	National Institute for Communicable Disease Control and Prevention, Chinese Center for Disease Control and Prevention/State Key Laboratory for Infectious Disease Prevention and Control	ftp://ftp.ncbi.nlm.nih.gov/genomes/all/GCF/002/759/695/GCF_002759695.1_ASM275969v1
GCF_002759775.1	Y	MG_11	PRJNA224116	SAMN07176385	F	na	Streptococcus suis	Suis	Streptococcus suis YS98	YS98	Contig	2017/11/07	National Institute for Communicable Disease Control and Prevention, Chinese Center for Disease Control and Prevention/State Key Laboratory for Infectious Disease Prevention and Control	ftp://ftp.ncbi.nlm.nih.gov/genomes/all/GCF/002/759/775/GCF_002759775.1_ASM275977v1
GCF_000212855.1	Y	MG_110	PRJNA224116	SAMN00253324	F	na	Streptococcus sanguinis	Mitis	Streptococcus sanguinis SK355	SK355	Scaffold	2011/05/11	Baylor College of Medicine	ftp://ftp.ncbi.nlm.nih.gov/genomes/all/GCF/000/212/855/GCF_000212855.1_ASM21285v1
GCF_000430305.1	Y	MG_111	PRJNA220249	SAMN02470848	F	na	Streptococcus mitis	Mitis	Streptococcus mitis 17/34	17/34	Contig	2013/07/16	Research Institute of Physical-Chemical Medicine, Moscow, Russia	ftp://ftp.ncbi.nlm.nih.gov/genomes/all/GCF/000/430/305/GCF_000430305.1_Smit.str17_34_v1.0
GCF_003944205.1	Y	MG_112	PRJNA224116	SAMN09631697	F	na	Streptococcus oralis subsp. dentisani	Mitis	Streptococcus oralis subsp. dentisani	BCA2	Contig	2018/12/12	Clemson University	ftp://ftp.ncbi.nlm.nih.gov/genomes/all/GCF/003/944/205/GCF_003944205.1_ASM394420v1
GCF_000222705.1	Y	MG_113	PRJNA224116	SAMN00621712	F	na	Streptococcus oralis subsp. dentisani	Mitis	Streptococcus mitis bv. 2 str. SK95	SK95	Contig	2011/08/04	J. Craig Venter Institute	ftp://ftp.ncbi.nlm.nih.gov/genomes/all/GCF/000/222/705/GCF_000222705.1_ASM22270v2
GCF_001175585.1	Y	MG_114	PRJNA224116	SAMEA1032786	F	na	Streptococcus equi subsp. equi	Pyogenic	Streptococcus equi subsp. equi	EQUI0039	Scaffold	2015/07/07	SC	ftp://ftp.ncbi.nlm.nih.gov/genomes/all/GCF/001/175/585/GCF_001175585.1_6817_2_86
GCF_001176705.1	Y	MG_114	PRJNA224116	SAMEA1032855	F	na	Streptococcus equi subsp. equi	Pyogenic	Streptococcus equi subsp. equi	EQUI0011	Contig	2015/07/07	SC	ftp://ftp.ncbi.nlm.nih.gov/genomes/all/GCF/001/176/705/GCF_001176705.1_6817_1_58
GCF_900459185.1	Y	MG_114	PRJNA224116	SAMEA3572411	F	na	Streptococcus equi subsp. equi	Pyogenic	Streptococcus equi subsp. equi	NCTC12092	Contig	2018/08/01	SC	ftp://ftp.ncbi.nlm.nih.gov/genomes/all/GCF/900/459/185/GCF_900459185.1_41825_B01
GCF_900636415.1	Y	MG_114	PRJNA224116	SAMEA3572409	F	na	Streptococcus equi subsp. equi	Pyogenic	Streptococcus equi subsp. equi	NCTC12091	Complete	2018/12/20	SC	ftp://ftp.ncbi.nlm.nih.gov/genomes/all/GCF/900/636/415/GCF_900636415.1_41825_A01
GCF_000026605.1	Y	MG_114	PRJNA224116	SAMEA2272197	F	representative genome	Streptococcus equi subsp. zooepidemicus	Pyogenic	Streptococcus equi subsp. zooepidemicus	H70	Complete	2009/03/26	The Wellcome Trust Sanger Institute	ftp://ftp.ncbi.nlm.nih.gov/genomes/all/GCF/000/026/605/GCF_000026605.1_ASM2660v1
GCF_900459475.1	Y	MG_114	PRJNA224116	SAMEA3956096	F	na	Streptococcus equi subsp. zooepidemicus	Pyogenic	Streptococcus equi subsp. zooepidemicus	NCTC4676	Contig	2018/08/01	SC	ftp://ftp.ncbi.nlm.nih.gov/genomes/all/GCF/900/459/475/GCF_900459475.1_46463_D01
GCF_900460185.1	Y	MG_114	PRJNA224116	SAMEA3572441	F	na	Streptococcus equi subsp. zooepidemicus	Pyogenic	Streptococcus equi subsp. zooepidemicus	NCTC7023	Contig	2018/08/01	SC	ftp://ftp.ncbi.nlm.nih.gov/genomes/all/GCF/900/460/185/GCF_900460185.1_41906_F01
GCF_900474875.1	Y	MG_114	PRJNA224116	SAMEA3542451	F	na	Streptococcus equi subsp. zooepidemicus	Pyogenic	Streptococcus equi subsp. zooepidemicus	NCTC12090	Complete	2018/06/18	SC	ftp://ftp.ncbi.nlm.nih.gov/genomes/all/GCF/900/474/875/GCF_900474875.1_41851_B01
GCF_900475295.1	Y	MG_114	PRJNA224116	SAMEA3696439	F	na	Streptococcus equi subsp. zooepidemicus	Pyogenic	Streptococcus equi subsp. zooepidemicus	NCTC6176	Complete	2018/06/17	SC	ftp://ftp.ncbi.nlm.nih.gov/genomes/all/GCF/900/475/295/GCF_900475295.1_43188_D01
GCF_900475435.1	Y	MG_114	PRJNA224116	SAMEA3662932	F	na	Streptococcus equi subsp. zooepidemicus	Pyogenic	Streptococcus equi subsp. zooepidemicus	NCTC11824	Complete	2018/06/17	SC	ftp://ftp.ncbi.nlm.nih.gov/genomes/all/GCF/900/475/435/GCF_900475435.1_42912_B01
GCF_901472575.1	Y	MG_114	PRJNA224116	SAMEA3307893	F	na	Streptococcus equi subsp. zooepidemicus	Pyogenic	Streptococcus equi subsp. zooepidemicus	NCTC11854	Complete	2019/05/11	SC	ftp://ftp.ncbi.nlm.nih.gov/genomes/all/GCF/901/472/575/GCF_901472575.1_37277_G01
GCF_901542385.1	Y	MG_114	PRJNA224116	SAMEA3572439	F	na	Streptococcus equi subsp. zooepidemicus	Pyogenic	Streptococcus equi subsp. zooepidemicus	NCTC4675	Complete	2019/05/17	SC	ftp://ftp.ncbi.nlm.nih.gov/genomes/all/GCF/901/542/385/GCF_901542385.1_41906_E01
GCF_000219765.1	Y	MG_114	PRJNA224116	SAMN02603034	F	na	Streptococcus equi subsp. zooepidemicus	Pyogenic	Streptococcus equi subsp. zooepidemicus ATCC 35246	ATCC 35246	Complete	2011/06/30	big	ftp://ftp.ncbi.nlm.nih.gov/genomes/all/GCF/000/219/765/GCF_000219765.1_ASM21976v1
GCF_000208725.1	Y	MG_114	PRJNA224116	SAMEA2272004	F	na	Streptococcus equi subsp. zooepidemicus	Pyogenic	Streptococcus equi subsp. zooepidemicus BHS5	BHS5	Scaffold	2010/11/22	Centre for Genomic Research. University of Liverpool	ftp://ftp.ncbi.nlm.nih.gov/genomes/all/GCF/000/208/725/GCF_000208725.1_ASM20872v1
GCF_000020765.1	Y	MG_114	PRJNA224116	SAMN02603943	F	na	Streptococcus equi subsp. zooepidemicus	Pyogenic	Streptococcus equi subsp. zooepidemicus MGCS10565	MGCS10565; ATCC BAA1716	Complete	2008/08/11	The Methodist Hospital Research Institute	ftp://ftp.ncbi.nlm.nih.gov/genomes/all/GCF/000/020/765/GCF_000020765.1_ASM2076v1
GCF_000876305.1	Y	MG_114	PRJNA224116	SAMN02298716	F	na	Streptococcus equi subsp. zooepidemicus	Pyogenic	Streptococcus equi subsp. zooepidemicus Sz12is	Sz12is	Contig	2015/02/17	Copenhagen University	ftp://ftp.ncbi.nlm.nih.gov/genomes/all/GCF/000/876/305/GCF_000876305.1_ASM87630v1
GCF_000876295.1	Y	MG_114	PRJNA224116	SAMN02298718	F	na	Streptococcus equi subsp. zooepidemicus	Pyogenic	Streptococcus equi subsp. zooepidemicus Sz16	Sz16	Contig	2015/02/17	Copenhagen University	ftp://ftp.ncbi.nlm.nih.gov/genomes/all/GCF/000/876/295/GCF_000876295.1_ASM87629v1
GCF_000876365.1	Y	MG_114	PRJNA224116	SAMN02298719	F	na	Streptococcus equi subsp. zooepidemicus	Pyogenic	Streptococcus equi subsp. zooepidemicus Sz35	Sz35	Contig	2015/02/17	Copenhagen University	ftp://ftp.ncbi.nlm.nih.gov/genomes/all/GCF/000/876/365/GCF_000876365.1_ASM87636v1
GCF_000876355.1	Y	MG_114	PRJNA224116	SAMN02298717	F	na	Streptococcus equi subsp. zooepidemicus	Pyogenic	Streptococcus equi subsp. zooepidemicus Sz5	Sz5	Contig	2015/02/17	Copenhagen University	ftp://ftp.ncbi.nlm.nih.gov/genomes/all/GCF/000/876/355/GCF_000876355.1_ASM87635v1
GCF_000876375.1	Y	MG_114	PRJNA224116	SAMN02298720	F	na	Streptococcus equi subsp. zooepidemicus	Pyogenic	Streptococcus equi subsp. zooepidemicus Sz57	Sz57	Contig	2015/02/17	Copenhagen University	ftp://ftp.ncbi.nlm.nih.gov/genomes/all/GCF/000/876/375/GCF_000876375.1_ASM87637v1
GCF_000876275.1	Y	MG_114	PRJNA224116	SAMN02298723	F	na	Streptococcus equi subsp. zooepidemicus	Pyogenic	Streptococcus equi subsp. zooepidemicus SzAM35	SzAM35	Contig	2015/02/17	Copenhagen University	ftp://ftp.ncbi.nlm.nih.gov/genomes/all/GCF/000/876/275/GCF_000876275.1_ASM87627v1
GCF_000876285.1	Y	MG_114	PRJNA224116	SAMN02298724	F	na	Streptococcus equi subsp. zooepidemicus	Pyogenic	Streptococcus equi subsp. zooepidemicus SzAM60	SzAM60	Contig	2015/02/17	Copenhagen University	ftp://ftp.ncbi.nlm.nih.gov/genomes/all/GCF/000/876/285/GCF_000876285.1_ASM87628v1
GCF_000445225.2	Y	MG_114	PRJNA224116	SAMN02221861	F	na	Streptococcus equi subsp. zooepidemicus	Pyogenic	Streptococcus equi subsp. zooepidemicus SzS31A1	SzS31A1	Contig	2014/05/13	Copenhagen University	ftp://ftp.ncbi.nlm.nih.gov/genomes/all/GCF/000/445/225/GCF_000445225.2_ASM44522v2
GCF_002096615.1	Y	MG_115	PRJNA224116	SAMN06705611	F	na	Streptococcus oralis subsp. dentisani	Mitis	Streptococcus oralis subsp. dentisani	RH_9883_08	Scaffold	2017/04/18	Slagelse Hospital	ftp://ftp.ncbi.nlm.nih.gov/genomes/all/GCF/002/096/615/GCF_002096615.1_ASM209661v1
GCF_002096685.1	Y	MG_116	PRJNA224116	SAMN06705608	F	na	Streptococcus oralis subsp. dentisani	Mitis	Streptococcus oralis subsp. dentisani	RH_13585_10	Contig	2017/04/18	Slagelse Hospital	ftp://ftp.ncbi.nlm.nih.gov/genomes/all/GCF/002/096/685/GCF_002096685.1_ASM209668v1
GCF_001302265.1	Y	MG_117	PRJNA224116	SAMN03955537	F	na	Streptococcus phocae	Pyogenic	Streptococcus phocae	ATCC 51973	Contig	2015/09/28	Universidad Andres Bello	ftp://ftp.ncbi.nlm.nih.gov/genomes/all/GCF/001/302/265/GCF_001302265.1_ASM130226v1
GCF_000772915.1	Y	MG_117	PRJNA224116	SAMN03114893	F	representative genome	Streptococcus phocae subsp. salmonis	Pyogenic	Streptococcus phocae subsp. salmonis	C-4	Contig	2014/11/06	Universidad Austral de Chile	ftp://ftp.ncbi.nlm.nih.gov/genomes/all/GCF/000/772/915/GCF_000772915.1_ASM77291v1
GCF_003943935.1	Y	MG_118	PRJNA224116	SAMN09631734	F	na	Streptococcus mitis	Mitis	Streptococcus mitis	BCC45	Contig	2018/12/12	Clemson University	ftp://ftp.ncbi.nlm.nih.gov/genomes/all/GCF/003/943/935/GCF_003943935.1_ASM394393v1
GCF_001578855.1	Y	MG_119	PRJNA224116	SAMN04325021	Y	na	Streptococcus oralis subsp. tigurinus	Mitis	Streptococcus oralis	DD14	Scaffold	2016/03/02	University of Kaiserslautern	ftp://ftp.ncbi.nlm.nih.gov/genomes/all/GCF/001/578/855/GCF_001578855.1_ASM157885v1
GCF_001578935.1	Y	MG_119	PRJNA224116	SAMN04325027	Y	na	Streptococcus oralis subsp. tigurinus	Mitis	Streptococcus oralis	DD15	Scaffold	2016/03/02	University of Kaiserslautern	ftp://ftp.ncbi.nlm.nih.gov/genomes/all/GCF/001/578/935/GCF_001578935.1_ASM157893v1
GCF_001579625.1	Y	MG_119	PRJNA224116	SAMN04325029	Y	na	Streptococcus oralis subsp. tigurinus	Mitis	Streptococcus oralis	DD17	Scaffold	2016/03/18	University of Kaiserslautern	ftp://ftp.ncbi.nlm.nih.gov/genomes/all/GCF/001/579/625/GCF_001579625.1_ASM157962v1
GCF_001578955.1	Y	MG_12	PRJNA224116	SAMN04325031	Y	na	Streptococcus parasanguinis	Mitis	Streptococcus parasanguinis	DD19	Scaffold	2016/03/02	University of Kaiserslautern	ftp://ftp.ncbi.nlm.nih.gov/genomes/all/GCF/001/578/955/GCF_001578955.1_ASM157895v1
GCF_001070915.1	Y	MG_12	PRJNA224116	SAMN03197535	F	na	Streptococcus parasanguinis	Mitis	Streptococcus parasanguinis	344_SPAR	Scaffold	2015/07/10	University of Washington	ftp://ftp.ncbi.nlm.nih.gov/genomes/all/GCF/001/070/915/GCF_001070915.1_ASM107091v1
GCF_001071155.1	Y	MG_12	PRJNA224116	SAMN03197643	F	na	Streptococcus parasanguinis	Mitis	Streptococcus parasanguinis	451_SPAR	Scaffold	2015/07/10	University of Washington	ftp://ftp.ncbi.nlm.nih.gov/genomes/all/GCF/001/071/155/GCF_001071155.1_ASM107115v1
GCF_001074295.1	Y	MG_12	PRJNA224116	SAMN03197975	F	na	Streptococcus parasanguinis	Mitis	Streptococcus parasanguinis	766_SPAR	Contig	2015/07/10	University of Washington	ftp://ftp.ncbi.nlm.nih.gov/genomes/all/GCF/001/074/295/GCF_001074295.1_ASM107429v1
GCF_001074855.1	Y	MG_12	PRJNA224116	SAMN03198095	F	na	Streptococcus parasanguinis	Mitis	Streptococcus parasanguinis	889_SPAR	Contig	2015/07/10	University of Washington	ftp://ftp.ncbi.nlm.nih.gov/genomes/all/GCF/001/074/855/GCF_001074855.1_ASM107485v1
GCF_001588805.1	Y	MG_12	PRJNA224116	SAMN03480630	F	na	Streptococcus parasanguinis	Mitis	Streptococcus parasanguinis	BVME8	Contig	2016/03/11	University of Malaya	ftp://ftp.ncbi.nlm.nih.gov/genomes/all/GCF/001/588/805/GCF_001588805.1_ASM158880v1
GCF_002860845.1	Y	MG_12	PRJNA224116	SAMN08193730	F	na	Streptococcus parasanguinis	Mitis	Streptococcus parasanguinis	UMB0216	Contig	2017/12/28	Loyola University Chicago	ftp://ftp.ncbi.nlm.nih.gov/genomes/all/GCF/002/860/845/GCF_002860845.1_ASM286084v1
GCF_000164675.2	Y	MG_12	PRJNA224116	SAMN00113608	F	representative genome	Streptococcus parasanguinis	Mitis	Streptococcus parasanguinis ATCC 15912	ATCC 15912	Complete	2011/06/10	Baylor College of Medicine	ftp://ftp.ncbi.nlm.nih.gov/genomes/all/GCF/000/164/675/GCF_000164675.2_ASM16467v2
GCF_000260695.1	Y	MG_12	PRJNA224116	SAMN00761820	F	na	Streptococcus parasanguinis	Mitis	Streptococcus parasanguinis F0449	F0449	Contig	2012/04/30	J. Craig Venter Institute	ftp://ftp.ncbi.nlm.nih.gov/genomes/all/GCF/000/260/695/GCF_000260695.1_SparasanguinisF0449v1.0
GCF_000262145.1	Y	MG_12	PRJNA224116	SAMN02603112	F	na	Streptococcus parasanguinis	Mitis	Streptococcus parasanguinis FW213	FW213	Complete	2012/05/09	Chang Gung University	ftp://ftp.ncbi.nlm.nih.gov/genomes/all/GCF/000/262/145/GCF_000262145.1_ASM26214v1
GCF_000146585.1	Y	MG_120	PRJNA224116	SAMN00116813	F	na	Streptococcus oralis genomosubspecies 1	Mitis	Streptococcus mitis ATCC 6249	ATCC 6249	Scaffold	2010/09/01	Baylor College of Medicine	ftp://ftp.ncbi.nlm.nih.gov/genomes/all/GCF/000/146/585/GCF_000146585.1_ASM14658v1
GCF_001096185.1	Y	MG_121	PRJNA224116	SAMEA1024701	F	na	Streptococcus pneumoniae	Mitis	Streptococcus pneumoniae	SMRU824	Contig	2015/07/17	SC	ftp://ftp.ncbi.nlm.nih.gov/genomes/all/GCF/001/096/185/GCF_001096185.1_6775_1_8
GCF_001074565.1	Y	MG_122	PRJNA224116	SAMN03198051	F	na	Streptococcus oralis genomosubspecies 1	Mitis	Streptococcus pseudopneumoniae	843_SPSE	Scaffold	2015/07/10	University of Washington	ftp://ftp.ncbi.nlm.nih.gov/genomes/all/GCF/001/074/565/GCF_001074565.1_ASM107456v1
GCF_002096925.1	Y	MG_123	PRJNA224116	SAMN06705595	F	na	Streptococcus mitis	Mitis	Streptococcus mitis	B_009152_10	Contig	2017/04/18	Slagelse Hospital	ftp://ftp.ncbi.nlm.nih.gov/genomes/all/GCF/002/096/925/GCF_002096925.1_ASM209692v1
GCF_002960055.1	Y	MG_124	PRJNA224116	SAMN08296056	F	na	Streptococcus suis	Suis	Streptococcus suis	2847	Contig	2018/02/28	Huazhong Agricultural University	ftp://ftp.ncbi.nlm.nih.gov/genomes/all/GCF/002/960/055/GCF_002960055.1_ASM296005v1
GCF_002964045.1	Y	MG_124	PRJNA224116	SAMN08295878	F	na	Streptococcus suis	Suis	Streptococcus suis	614	Contig	2018/02/28	Huazhong Agricultural University	ftp://ftp.ncbi.nlm.nih.gov/genomes/all/GCF/002/964/045/GCF_002964045.1_ASM296404v1
GCF_002355895.1	Y	MG_125	PRJNA224116	SAMD00061134	F	na	Streptococcus sp.	Mitis	Streptococcus sp. NPS 308	NPS 308	Complete	2016/10/17	Department of Pediatric Dentistry, Nagasaki University Graduate School of Biomedical Sciences	ftp://ftp.ncbi.nlm.nih.gov/genomes/all/GCF/002/355/895/GCF_002355895.1_ASM235589v1
GCF_002096815.1	Y	MG_126	PRJNA224116	SAMN06705599	F	na	Streptococcus mitis	Mitis	Streptococcus mitis	RH_12363_08	Scaffold	2017/04/18	Slagelse Hospital	ftp://ftp.ncbi.nlm.nih.gov/genomes/all/GCF/002/096/815/GCF_002096815.1_ASM209681v1
GCF_001885095.1	Y	MG_127	PRJNA224116	SAMN05199910	F	na	Streptococcus bovimastitidis	Pyogenic	Streptococcus bovimastitidis	NZ1587	Contig	2016/11/21	University of Cambridge	ftp://ftp.ncbi.nlm.nih.gov/genomes/all/GCF/001/885/095/GCF_001885095.1_ASM188509v1
GCF_004283785.1	Y	MG_128	PRJNA224116	SAMN10939614	F	na	Streptococcus parasuis	Suis	Streptococcus parasuis	4253	Scaffold	2019/02/20	University of Zurich	ftp://ftp.ncbi.nlm.nih.gov/genomes/all/GCF/004/283/785/GCF_004283785.1_ASM428378v1
GCF_900104225.1	Y	MG_129	PRJNA224116	SAMN05216347	F	na	Streptococcus equinus	Bovis	Streptococcus equinus	Sb04	Contig	2016/10/21	DOE - JOINT GENOME INSTITUTE	ftp://ftp.ncbi.nlm.nih.gov/genomes/all/GCF/900/104/225/GCF_900104225.1_IMG-taxon_2651870306_annotated_assembly
GCF_000724645.1	Y	MG_13	PRJNA224116	SAMN02768894	F	na	Streptococcus parasanguinis	Mitis	Streptococcus parasanguinis	C1A	Scaffold	2014/07/08	University of Malaya	ftp://ftp.ncbi.nlm.nih.gov/genomes/all/GCF/000/724/645/GCF_000724645.1_ASM72464v1
GCF_000963275.1	Y	MG_13	PRJNA224116	SAMN03334906	F	na	Streptococcus parasanguinis	Mitis	Streptococcus parasanguinis	MGH413	Contig	2015/03/25	University at Buffalo	ftp://ftp.ncbi.nlm.nih.gov/genomes/all/GCF/000/963/275/GCF_000963275.1_ASM96327v1
GCF_001070445.1	Y	MG_13	PRJNA224116	SAMN03197258	F	na	Streptococcus parasanguinis	Mitis	Streptococcus parasanguinis	1287_SPAR	Scaffold	2015/07/10	University of Washington	ftp://ftp.ncbi.nlm.nih.gov/genomes/all/GCF/001/070/445/GCF_001070445.1_ASM107044v1
GCF_001070575.1	Y	MG_13	PRJNA224116	SAMN03197328	F	na	Streptococcus parasanguinis	Mitis	Streptococcus parasanguinis	139.rep1_SPAR	Scaffold	2015/07/10	University of Washington	ftp://ftp.ncbi.nlm.nih.gov/genomes/all/GCF/001/070/575/GCF_001070575.1_ASM107057v1
GCF_001071035.1	Y	MG_13	PRJNA224116	SAMN03197583	F	na	Streptococcus parasanguinis	Mitis	Streptococcus parasanguinis	392_SPAR	Contig	2015/07/10	University of Washington	ftp://ftp.ncbi.nlm.nih.gov/genomes/all/GCF/001/071/035/GCF_001071035.1_ASM107103v1
GCF_001071295.1	Y	MG_13	PRJNA224116	SAMN03197737	F	na	Streptococcus parasanguinis	Mitis	Streptococcus parasanguinis	540.rep1_SPAR	Scaffold	2015/07/10	University of Washington	ftp://ftp.ncbi.nlm.nih.gov/genomes/all/GCF/001/071/295/GCF_001071295.1_ASM107129v1
GCF_001072295.1	Y	MG_13	PRJNA224116	SAMN03197508	F	na	Streptococcus parasanguinis	Mitis	Streptococcus parasanguinis	318_SPAR	Scaffold	2015/07/10	University of Washington	ftp://ftp.ncbi.nlm.nih.gov/genomes/all/GCF/001/072/295/GCF_001072295.1_ASM107229v1
GCF_001072435.1	Y	MG_13	PRJNA224116	SAMN03197539	F	na	Streptococcus parasanguinis	Mitis	Streptococcus parasanguinis	349_SPAR	Scaffold	2015/07/10	University of Washington	ftp://ftp.ncbi.nlm.nih.gov/genomes/all/GCF/001/072/435/GCF_001072435.1_ASM107243v1
GCF_001073155.1	Y	MG_13	PRJNA224116	SAMN03197706	F	na	Streptococcus parasanguinis	Mitis	Streptococcus parasanguinis	512_SPAR	Scaffold	2015/07/10	University of Washington	ftp://ftp.ncbi.nlm.nih.gov/genomes/all/GCF/001/073/155/GCF_001073155.1_ASM107315v1
GCF_001073735.1	Y	MG_13	PRJNA224116	SAMN03197851	F	na	Streptococcus parasanguinis	Mitis	Streptococcus parasanguinis	65_SPAR	Contig	2015/07/10	University of Washington	ftp://ftp.ncbi.nlm.nih.gov/genomes/all/GCF/001/073/735/GCF_001073735.1_ASM107373v1
GCF_001588725.1	Y	MG_13	PRJNA224116	SAMN03480701	F	na	Streptococcus parasanguinis	Mitis	Streptococcus parasanguinis	POW10	Contig	2016/03/11	University of Malaya	ftp://ftp.ncbi.nlm.nih.gov/genomes/all/GCF/001/588/725/GCF_001588725.1_ASM158872v1
GCF_003468585.1	Y	MG_13	PRJNA224116	SAMN09736454	F	na	Streptococcus parasanguinis	Mitis	Streptococcus parasanguinis	AM33-3BH	Scaffold	2018/09/06	BGI	ftp://ftp.ncbi.nlm.nih.gov/genomes/all/GCF/003/468/585/GCF_003468585.1_ASM346858v1
GCF_003470855.1	Y	MG_13	PRJNA224116	SAMN09736300	F	na	Streptococcus parasanguinis	Mitis	Streptococcus parasanguinis	AM25-15	Scaffold	2018/09/06	BGI	ftp://ftp.ncbi.nlm.nih.gov/genomes/all/GCF/003/470/855/GCF_003470855.1_ASM347085v1
GCF_003474485.1	Y	MG_13	PRJNA224116	SAMN09734699	F	na	Streptococcus parasanguinis	Mitis	Streptococcus parasanguinis	AF42-15	Contig	2018/09/06	BGI	ftp://ftp.ncbi.nlm.nih.gov/genomes/all/GCF/003/474/485/GCF_003474485.1_ASM347448v1
GCF_003475645.1	Y	MG_13	PRJNA224116	SAMN09734566	F	na	Streptococcus parasanguinis	Mitis	Streptococcus parasanguinis	AF30-12BH	Scaffold	2018/09/06	BGI	ftp://ftp.ncbi.nlm.nih.gov/genomes/all/GCF/003/475/645/GCF_003475645.1_ASM347564v1
GCF_003942525.1	Y	MG_13	PRJNA224116	SAMN09631758	F	na	Streptococcus parasanguinis	Mitis	Streptococcus parasanguinis	A1	Contig	2018/12/12	Clemson University	ftp://ftp.ncbi.nlm.nih.gov/genomes/all/GCF/003/942/525/GCF_003942525.1_ASM394252v1
GCF_004127205.1	Y	MG_13	PRJNA224116	SAMN09060971	F	na	Streptococcus parasanguinis	Mitis	Streptococcus parasanguinis	NU87	Contig	2019/02/01	Newcastle University	ftp://ftp.ncbi.nlm.nih.gov/genomes/all/GCF/004/127/205/GCF_004127205.1_ASM412720v1
GCF_004166995.1	Y	MG_13	PRJNA224116	SAMN10239556	F	na	Streptococcus parasanguinis	Mitis	Streptococcus parasanguinis	bf_0095	Contig	2019/02/11	Broad Institute	ftp://ftp.ncbi.nlm.nih.gov/genomes/all/GCF/004/166/995/GCF_004166995.1_ASM416699v1
GCF_000187505.1	Y	MG_13	PRJNA224116	SAMN00253299	F	na	Streptococcus parasanguinis	Mitis	Streptococcus parasanguinis ATCC 903	ATCC 903	Scaffold	2011/02/03	Baylor College of Medicine	ftp://ftp.ncbi.nlm.nih.gov/genomes/all/GCF/000/187/505/GCF_000187505.1_ASM18750v1
GCF_000507765.1	Y	MG_13	PRJNA224116	SAMN01162070	F	na	Streptococcus parasanguinis	Mitis	Streptococcus parasanguinis CC87K	CC87K	Scaffold	2013/12/13	Broad Institute	ftp://ftp.ncbi.nlm.nih.gov/genomes/all/GCF/000/507/765/GCF_000507765.1_Stre_para_CC87K_V1
GCF_000180035.1	Y	MG_13	PRJNA224116	SAMN00115113	F	na	Streptococcus parasanguinis	Mitis	Streptococcus parasanguinis F0405	F0405	Contig	2010/11/04	J. Craig Venter Institute	ftp://ftp.ncbi.nlm.nih.gov/genomes/all/GCF/000/180/035/GCF_000180035.1_ASM18003v1
GCF_000222725.1	Y	MG_13	PRJNA224116	SAMN00621706	F	na	Streptococcus parasanguinis	Mitis	Streptococcus parasanguinis SK236	SK236	Contig	2011/08/04	J. Craig Venter Institute	ftp://ftp.ncbi.nlm.nih.gov/genomes/all/GCF/000/222/725/GCF_000222725.1_ASM22272v2
GCF_001808745.1	Y	MG_13	PRJNA224116	SAMN04477536	F	na	Streptococcus sp.	Mitis	Streptococcus sp. HMSC057G03	HMSC057G03	Scaffold	2016/10/21	The Genome Institute at Washington University	ftp://ftp.ncbi.nlm.nih.gov/genomes/all/GCF/001/808/745/GCF_001808745.1_ASM180874v1
GCF_001813505.1	Y	MG_13	PRJNA224116	SAMN04480345	F	na	Streptococcus sp.	Mitis	Streptococcus sp. HMSC061E03	HMSC061E03	Scaffold	2016/10/21	The Genome Institute at Washington University	ftp://ftp.ncbi.nlm.nih.gov/genomes/all/GCF/001/813/505/GCF_001813505.1_ASM181350v1
GCF_001813525.1	Y	MG_13	PRJNA224116	SAMN04480358	F	na	Streptococcus sp.	Mitis	Streptococcus sp. HMSC065C01	HMSC065C01	Scaffold	2016/10/21	The Genome Institute at Washington University	ftp://ftp.ncbi.nlm.nih.gov/genomes/all/GCF/001/813/525/GCF_001813525.1_ASM181352v1
GCF_001815045.1	Y	MG_13	PRJNA224116	SAMN04480422	F	na	Streptococcus sp.	Mitis	Streptococcus sp. HMSC065E03	HMSC065E03	Scaffold	2016/10/21	The Genome Institute at Washington University	ftp://ftp.ncbi.nlm.nih.gov/genomes/all/GCF/001/815/045/GCF_001815045.1_ASM181504v1
GCF_001813105.1	Y	MG_13	PRJNA224116	SAMN04480070	F	na	Streptococcus sp.	Mitis	Streptococcus sp. HMSC072C09	HMSC072C09	Scaffold	2016/10/21	The Genome Institute at Washington University	ftp://ftp.ncbi.nlm.nih.gov/genomes/all/GCF/001/813/105/GCF_001813105.1_ASM181310v1
GCF_001813295.1	Y	MG_13	PRJNA224116	SAMN04480066	F	na	Streptococcus sp.	Mitis	Streptococcus sp. HMSC072G04	HMSC072G04	Scaffold	2016/10/21	The Genome Institute at Washington University	ftp://ftp.ncbi.nlm.nih.gov/genomes/all/GCF/001/813/295/GCF_001813295.1_ASM181329v1
GCF_001812015.1	Y	MG_13	PRJNA224116	SAMN04477645	F	na	Streptococcus sp.	Mitis	Streptococcus sp. HMSC073D05	HMSC073D05	Scaffold	2016/10/21	The Genome Institute at Washington University	ftp://ftp.ncbi.nlm.nih.gov/genomes/all/GCF/001/812/015/GCF_001812015.1_ASM181201v1
GCF_001808725.1	Y	MG_13	PRJNA224116	SAMN04477535	F	na	Streptococcus sp.	Mitis	Streptococcus sp. HMSC074F05	HMSC074F05	Scaffold	2016/10/21	The Genome Institute at Washington University	ftp://ftp.ncbi.nlm.nih.gov/genomes/all/GCF/001/808/725/GCF_001808725.1_ASM180872v1
GCF_001837905.1	Y	MG_13	PRJNA224116	SAMN04498651	F	na	Streptococcus sp.	Mitis	Streptococcus sp. HMSC076C09	HMSC076C09	Scaffold	2016/10/25	The Genome Institute at Washington University	ftp://ftp.ncbi.nlm.nih.gov/genomes/all/GCF/001/837/905/GCF_001837905.1_ASM183790v1
GCF_001813675.1	Y	MG_13	PRJNA224116	SAMN04480352	F	na	Streptococcus sp.	Mitis	Streptococcus sp. HMSC078D09	HMSC078D09	Scaffold	2016/10/21	The Genome Institute at Washington University	ftp://ftp.ncbi.nlm.nih.gov/genomes/all/GCF/001/813/675/GCF_001813675.1_ASM181367v1
GCF_000448565.1	Y	MG_13	PRJNA220226	SAMN02471220	F	na	Streptococcus sp.	Mitis	Streptococcus sp. HSISM1	HSISM1	Chromosome	2013/08/26	Top Institute Food and Nutrition (TIFN)	ftp://ftp.ncbi.nlm.nih.gov/genomes/all/GCF/000/448/565/GCF_000448565.1_HSISM1_1.0
GCF_901553735.1	Y	MG_130	PRJNA224116	SAMEA3594355	F	na	Streptococcus porcinus	Pyogenic	Streptococcus porcinus	NCTC10925	Complete	2019/05/17	SC	ftp://ftp.ncbi.nlm.nih.gov/genomes/all/GCF/901/553/735/GCF_901553735.1_41965_D01
GCF_000187955.1	Y	MG_130	PRJNA224116	SAMN02436556	F	na	Streptococcus porcinus	Pyogenic	Streptococcus porcinus str. Jelinkova 176	Jelinkova 176	Contig	2011/05/06	JCVI	ftp://ftp.ncbi.nlm.nih.gov/genomes/all/GCF/000/187/955/GCF_000187955.1_ASM18795v2
GCF_900187085.1	Y	MG_131	PRJNA224116	SAMEA4412692	F	na	Streptococcus merionis	-	Streptococcus merionis	NCTC13788	Complete	2017/08/15	SC	ftp://ftp.ncbi.nlm.nih.gov/genomes/all/GCF/900/187/085/GCF_900187085.1_50624_E01
GCF_001579035.1	Y	MG_132	PRJNA224116	SAMN04325055	F	na	Streptococcus mitis	Mitis	Streptococcus mitis	DD26	Scaffold	2016/03/02	University of Kaiserslautern	ftp://ftp.ncbi.nlm.nih.gov/genomes/all/GCF/001/579/035/GCF_001579035.1_ASM157903v1
GCF_003943965.1	Y	MG_133	PRJNA224116	SAMN09631735	F	na	Streptococcus mitis	Mitis	Streptococcus mitis	BCC49	Contig	2018/12/12	Clemson University	ftp://ftp.ncbi.nlm.nih.gov/genomes/all/GCF/003/943/965/GCF_003943965.1_ASM394396v1
GCF_005144795.1	Y	MG_133	PRJNA224116	SAMN11491145	F	na	Streptococcus mitis	Mitis	Streptococcus mitis	ColumbLawn	Contig	2019/05/04	maclea_lab	ftp://ftp.ncbi.nlm.nih.gov/genomes/all/GCF/005/144/795/GCF_005144795.1_ASM514479v1
GCF_003859975.1	Y	MG_133	PRJNA224116	SAMN10478696	F	na	Streptococcus sp.	Mitis	Streptococcus sp. OH4692_COT-348	OH4692_COT-348	Contig	2018/12/03	UC Davis	ftp://ftp.ncbi.nlm.nih.gov/genomes/all/GCF/003/859/975/GCF_003859975.1_ASM385997v1
GCF_003942665.1	Y	MG_134	PRJNA224116	SAMN09631748	F	na	Streptococcus oralis subsp. dentisani	Mitis	Streptococcus mitis	BCA16	Contig	2018/12/12	Clemson University	ftp://ftp.ncbi.nlm.nih.gov/genomes/all/GCF/003/942/665/GCF_003942665.1_ASM394266v1
GCF_004127215.1	Y	MG_134	PRJNA224116	SAMN09060969	F	na	Streptococcus oralis	Mitis	Streptococcus oralis	NU43	Contig	2019/02/01	Newcastle University	ftp://ftp.ncbi.nlm.nih.gov/genomes/all/GCF/004/127/215/GCF_004127215.1_ASM412721v1
GCF_002860825.1	Y	MG_135	PRJNA224116	SAMN08193729	F	na	Streptococcus mitis	Mitis	Streptococcus mitis	UMB0079	Contig	2017/12/28	Loyola University Chicago	ftp://ftp.ncbi.nlm.nih.gov/genomes/all/GCF/002/860/825/GCF_002860825.1_ASM286082v1
GCF_002860865.1	Y	MG_135	PRJNA224116	SAMN08193728	F	na	Streptococcus mitis	Mitis	Streptococcus mitis	UMB1341	Scaffold	2017/12/28	Loyola University Chicago	ftp://ftp.ncbi.nlm.nih.gov/genomes/all/GCF/002/860/865/GCF_002860865.1_ASM286086v1
GCF_003942795.1	Y	MG_136	PRJNA224116	SAMN09631739	F	na	Streptococcus oralis subsp. tigurinus	Mitis	Streptococcus mitis	BCC60	Contig	2018/12/12	Clemson University	ftp://ftp.ncbi.nlm.nih.gov/genomes/all/GCF/003/942/795/GCF_003942795.1_ASM394279v1
GCF_004127235.1	Y	MG_137	PRJNA224116	SAMN09060968	F	na	Streptococcus oralis	Mitis	Streptococcus oralis	NU39	Contig	2019/02/01	Newcastle University	ftp://ftp.ncbi.nlm.nih.gov/genomes/all/GCF/004/127/235/GCF_004127235.1_ASM412723v1
GCF_000831085.1	Y	MG_137	PRJNA224116	SAMN03284399	F	na	Streptococcus sp.	Mitis	Streptococcus sp. DBCMS	DBCMS	Contig	2015/02/02	FDA	ftp://ftp.ncbi.nlm.nih.gov/genomes/all/GCF/000/831/085/GCF_000831085.1_ASM83108v1
GCF_003609975.1	Y	MG_138	PRJNA224116	SAMD00097183	F	na	Streptococcus ruminantium	Suis	Streptococcus ruminantium	GUT187T	Complete	2018/04/12	Department of Infectious Diseases	ftp://ftp.ncbi.nlm.nih.gov/genomes/all/GCF/003/609/975/GCF_003609975.1_ASM360997v1
GCF_002759445.1	Y	MG_138	PRJNA224116	SAMN07176384	F	na	Streptococcus suis	Suis	Streptococcus suis S33	S33	Contig	2017/11/07	National Institute for Communicable Disease Control and Prevention, Chinese Center for Disease Control and Prevention/State Key Laboratory for Infectious Disease Prevention and Control	ftp://ftp.ncbi.nlm.nih.gov/genomes/all/GCF/002/759/445/GCF_002759445.1_ASM275944v1
GCF_003943815.1	Y	MG_139	PRJNA224116	SAMN09631764	F	na	Streptococcus cristatus	Mitis	Streptococcus cristatus	BCC51	Contig	2018/12/12	Clemson University	ftp://ftp.ncbi.nlm.nih.gov/genomes/all/GCF/003/943/815/GCF_003943815.1_ASM394381v1
GCF_003942465.1	Y	MG_14	PRJNA224116	SAMN09631762	F	na	Streptococcus sanguinis	Mitis	Streptococcus sanguinis	BCC39	Contig	2018/12/12	Clemson University	ftp://ftp.ncbi.nlm.nih.gov/genomes/all/GCF/003/942/465/GCF_003942465.1_ASM394246v1
GCF_003943655.1	Y	MG_14	PRJNA224116	SAMN09631778	F	na	Streptococcus sanguinis	Mitis	Streptococcus sanguinis	BCC31	Contig	2018/12/12	Clemson University	ftp://ftp.ncbi.nlm.nih.gov/genomes/all/GCF/003/943/655/GCF_003943655.1_ASM394365v1
GCF_003944465.1	Y	MG_14	PRJNA224116	SAMN09631780	F	na	Streptococcus sanguinis	Mitis	Streptococcus sanguinis	KLC04	Contig	2018/12/12	Clemson University	ftp://ftp.ncbi.nlm.nih.gov/genomes/all/GCF/003/944/465/GCF_003944465.1_ASM394446v1
GCF_900635155.1	Y	MG_14	PRJNA224116	SAMEA3307890	F	na	Streptococcus sanguinis	Mitis	Streptococcus sanguinis	NCTC 10904	Complete	2018/12/19	SC	ftp://ftp.ncbi.nlm.nih.gov/genomes/all/GCF/900/635/155/GCF_900635155.1_36725_F02
GCF_001074975.1	Y	MG_140	PRJNA224116	SAMN03197956	F	na	Streptococcus mitis	Mitis	Streptococcus pseudopneumoniae	75_SPSE	Scaffold	2015/07/10	University of Washington	ftp://ftp.ncbi.nlm.nih.gov/genomes/all/GCF/001/074/975/GCF_001074975.1_ASM107497v1
GCF_002961305.1	Y	MG_141	PRJNA224116	SAMN08295972	F	na	Streptococcus suis	Suis	Streptococcus suis	1225	Contig	2018/02/28	Huazhong Agricultural University	ftp://ftp.ncbi.nlm.nih.gov/genomes/all/GCF/002/961/305/GCF_002961305.1_ASM296130v1
GCF_003944215.1	Y	MG_142	PRJNA224116	SAMN09631696	F	na	Streptococcus oralis subsp. dentisani	Mitis	Streptococcus oralis	BCA1	Contig	2018/12/12	Clemson University	ftp://ftp.ncbi.nlm.nih.gov/genomes/all/GCF/003/944/215/GCF_003944215.1_ASM394421v1
GCF_003143695.2	Y	MG_143	PRJNA224116	SAMN08929985	F	na	Streptococcus halitosis	Mitis	Streptococcus halitosis	VT-4	Scaffold	2018/12/08	Human Microbiology Institute	ftp://ftp.ncbi.nlm.nih.gov/genomes/all/GCF/003/143/695/GCF_003143695.2_ASM314369v2
GCF_001411485.1	Y	MG_143	PRJNA224116	SAMN04123206	F	na	Streptococcus oralis subsp. tigurinus	Mitis	Streptococcus oralis	89a	Scaffold	2015/10/22	The University of Queensland	ftp://ftp.ncbi.nlm.nih.gov/genomes/all/GCF/001/411/485/GCF_001411485.1_ASM141148v1
GCF_000257845.1	Y	MG_143	PRJNA224116	SAMN00761796	F	na	Streptococcus oralis subsp. tigurinus	Mitis	Streptococcus oralis SK1074	SK1074	Contig	2012/04/05	J. Craig Venter Institute	ftp://ftp.ncbi.nlm.nih.gov/genomes/all/GCF/000/257/845/GCF_000257845.1_ASM25784v1
GCF_002096255.1	Y	MG_143	PRJNA224116	SAMN06705634	F	na	Streptococcus oralis subsp. tigurinus	Mitis	Streptococcus oralis subsp. tigurinus	RH_49702_11	Contig	2017/04/18	Slagelse Hospital	ftp://ftp.ncbi.nlm.nih.gov/genomes/all/GCF/002/096/255/GCF_002096255.1_ASM209625v1
GCF_002096285.1	Y	MG_143	PRJNA224116	SAMN06705631	F	na	Streptococcus oralis subsp. tigurinus	Mitis	Streptococcus oralis subsp. tigurinus	OD_339823_10	Scaffold	2017/04/18	Slagelse Hospital	ftp://ftp.ncbi.nlm.nih.gov/genomes/all/GCF/002/096/285/GCF_002096285.1_ASM209628v1
GCF_002096295.1	Y	MG_143	PRJNA224116	SAMN06705633	F	na	Streptococcus oralis subsp. tigurinus	Mitis	Streptococcus oralis subsp. tigurinus	RH_48720_11	Scaffold	2017/04/18	Slagelse Hospital	ftp://ftp.ncbi.nlm.nih.gov/genomes/all/GCF/002/096/295/GCF_002096295.1_ASM209629v1
GCF_002096415.1	Y	MG_143	PRJNA224116	SAMN06705627	F	na	Streptococcus oralis subsp. tigurinus	Mitis	Streptococcus oralis subsp. tigurinus	OD_311286_11	Scaffold	2017/04/18	Slagelse Hospital	ftp://ftp.ncbi.nlm.nih.gov/genomes/all/GCF/002/096/415/GCF_002096415.1_ASM209641v1
GCF_000286475.1	Y	MG_143	PRJNA224116	SAMN00828789	F	na	Streptococcus oralis subsp. tigurinus	Mitis	Streptococcus sp. BS35b	BS35b	Contig	2012/08/10	J. Craig Venter Institute	ftp://ftp.ncbi.nlm.nih.gov/genomes/all/GCF/000/286/475/GCF_000286475.1_SspBS35bv1.0
GCF_000526095.1	Y	MG_143	PRJNA224116	SAMN02641576	F	na	Streptococcus oralis subsp. tigurinus	Mitis	Streptococcus sp. CM6	CM6	Contig	2014/01/31	JCVI	ftp://ftp.ncbi.nlm.nih.gov/genomes/all/GCF/000/526/095/GCF_000526095.1_SspCM6v1.0
GCF_000526075.1	Y	MG_143	PRJNA224116	SAMN02641578	F	na	Streptococcus oralis subsp. tigurinus	Mitis	Streptococcus sp. SR1	SR1	Contig	2014/01/31	JCVI	ftp://ftp.ncbi.nlm.nih.gov/genomes/all/GCF/000/526/075/GCF_000526075.1_SspSR1v1.0
GCF_002096845.1	Y	MG_144	PRJNA224116	SAMN06705598	F	na	Streptococcus mitis	Mitis	Streptococcus mitis	OD_317805_11	Scaffold	2017/04/18	Slagelse Hospital	ftp://ftp.ncbi.nlm.nih.gov/genomes/all/GCF/002/096/845/GCF_002096845.1_ASM209684v1
GCF_001070715.1	Y	MG_145	PRJNA224116	SAMN03197355	F	na	Streptococcus mitis	Mitis	Streptococcus pseudopneumoniae	163_SPSE	Scaffold	2015/07/10	University of Washington	ftp://ftp.ncbi.nlm.nih.gov/genomes/all/GCF/001/070/715/GCF_001070715.1_ASM107071v1
GCF_003943505.1	Y	MG_146	PRJNA224116	SAMN09631684	F	na	Streptococcus cristatus	Mitis	Streptococcus cristatus	A52	Contig	2018/12/12	Clemson University	ftp://ftp.ncbi.nlm.nih.gov/genomes/all/GCF/003/943/505/GCF_003943505.1_ASM394350v1
GCF_001579645.1	Y	MG_147	PRJNA224116	SAMN04325030	Y	na	Streptococcus infantis	Mitis	Streptococcus infantis	DD18	Scaffold	2016/03/18	University of Kaiserslautern	ftp://ftp.ncbi.nlm.nih.gov/genomes/all/GCF/001/579/645/GCF_001579645.1_ASM157964v1
GCF_000785785.1	Y	MG_148	PRJNA224116	SAMN03093229	F	na	Streptococcus uberis	Pyogenic	Streptococcus uberis	CAIM 1894	Contig	2014/11/21	CIAD, A.C.	ftp://ftp.ncbi.nlm.nih.gov/genomes/all/GCF/000/785/785/GCF_000785785.1_CAIM1894t_spades_scaffold
GCF_002964575.1	Y	MG_149	PRJNA224116	SAMN08295837	F	na	Streptococcus suis	Suis	Streptococcus suis	15	Contig	2018/02/28	Huazhong Agricultural University	ftp://ftp.ncbi.nlm.nih.gov/genomes/all/GCF/002/964/575/GCF_002964575.1_ASM296457v1
GCF_000188055.2	Y	MG_15	PRJNA224116	SAMN02436559	F	representative genome	Streptococcus urinalis	Pyogenic	Streptococcus urinalis 2285-97	2285-97	Contig	2011/11/18	JCVI	ftp://ftp.ncbi.nlm.nih.gov/genomes/all/GCF/000/188/055/GCF_000188055.2_ASM18805v3
GCF_001073635.1	Y	MG_150	PRJNA224116	SAMN03197832	F	na	Streptococcus intermedius	Anginosus	Streptococcus intermedius	631_SCON	Scaffold	2015/07/10	University of Washington	ftp://ftp.ncbi.nlm.nih.gov/genomes/all/GCF/001/073/635/GCF_001073635.1_ASM107363v1
GCF_002073355.2	Y	MG_150	PRJNA224116	SAMN04875570	F	na	Streptococcus intermedius	Anginosus	Streptococcus intermedius	FDAARGOS_233	Complete	2018/02/23	University of Maryland School of Medicine Institute for Genome Sciences (IGS) - sequencing center	ftp://ftp.ncbi.nlm.nih.gov/genomes/all/GCF/002/073/355/GCF_002073355.2_ASM207335v2
GCF_002356055.1	Y	MG_150	PRJNA224116	SAMD00031898	F	na	Streptococcus intermedius	Anginosus	Streptococcus intermedius	TYG1620	Complete	2016/12/02	Pathogen Genomics Center, National Institute of Infectious Diseases	ftp://ftp.ncbi.nlm.nih.gov/genomes/all/GCF/002/356/055/GCF_002356055.1_ASM235605v1
GCF_002879575.1	Y	MG_150	PRJNA224116	SAMN08324742	F	na	Streptococcus intermedius	Anginosus	Streptococcus intermedius	32811	Scaffold	2018/01/13	zhejiang University	ftp://ftp.ncbi.nlm.nih.gov/genomes/all/GCF/002/879/575/GCF_002879575.1_ASM287957v1
GCF_002879585.1	Y	MG_150	PRJNA224116	SAMN08324741	F	na	Streptococcus intermedius	Anginosus	Streptococcus intermedius	30309	Contig	2018/01/13	zhejiang University	ftp://ftp.ncbi.nlm.nih.gov/genomes/all/GCF/002/879/585/GCF_002879585.1_ASM287958v1
GCF_002879755.1	Y	MG_150	PRJNA224116	SAMN08324743	F	na	Streptococcus intermedius	Anginosus	Streptococcus intermedius	LC4	Scaffold	2018/01/14	zhejiang University	ftp://ftp.ncbi.nlm.nih.gov/genomes/all/GCF/002/879/755/GCF_002879755.1_ASM287975v1
GCF_003284685.1	Y	MG_150	PRJNA224116	SAMN09435561	F	na	Streptococcus intermedius	Anginosus	Streptococcus intermedius	LAU_SINT	Contig	2018/06/29	Lebanese American University	ftp://ftp.ncbi.nlm.nih.gov/genomes/all/GCF/003/284/685/GCF_003284685.1_ASM328468v1
GCF_003943045.1	Y	MG_150	PRJNA224116	SAMN09631724	F	na	Streptococcus intermedius	Anginosus	Streptococcus intermedius	A5	Contig	2018/12/12	Clemson University	ftp://ftp.ncbi.nlm.nih.gov/genomes/all/GCF/003/943/045/GCF_003943045.1_ASM394304v1
GCF_003943085.1	Y	MG_150	PRJNA224116	SAMN09631722	F	na	Streptococcus intermedius	Anginosus	Streptococcus intermedius	A3	Contig	2018/12/12	Clemson University	ftp://ftp.ncbi.nlm.nih.gov/genomes/all/GCF/003/943/085/GCF_003943085.1_ASM394308v1
GCF_003943095.1	Y	MG_150	PRJNA224116	SAMN09631721	F	na	Streptococcus intermedius	Anginosus	Streptococcus intermedius	A2	Contig	2018/12/12	Clemson University	ftp://ftp.ncbi.nlm.nih.gov/genomes/all/GCF/003/943/095/GCF_003943095.1_ASM394309v1
GCF_003943125.1	Y	MG_150	PRJNA224116	SAMN09631719	F	na	Streptococcus intermedius	Anginosus	Streptococcus intermedius	KLC02	Contig	2018/12/12	Clemson University	ftp://ftp.ncbi.nlm.nih.gov/genomes/all/GCF/003/943/125/GCF_003943125.1_ASM394312v1
GCF_003943145.1	Y	MG_150	PRJNA224116	SAMN09631718	F	na	Streptococcus intermedius	Anginosus	Streptococcus intermedius	BCC47	Contig	2018/12/12	Clemson University	ftp://ftp.ncbi.nlm.nih.gov/genomes/all/GCF/003/943/145/GCF_003943145.1_ASM394314v1
GCF_003944005.1	Y	MG_150	PRJNA224116	SAMN09631723	F	na	Streptococcus intermedius	Anginosus	Streptococcus intermedius	A4	Contig	2018/12/12	Clemson University	ftp://ftp.ncbi.nlm.nih.gov/genomes/all/GCF/003/944/005/GCF_003944005.1_ASM394400v1
GCF_003944015.1	Y	MG_150	PRJNA224116	SAMN09631720	F	na	Streptococcus intermedius	Anginosus	Streptococcus intermedius	KLC09	Contig	2018/12/12	Clemson University	ftp://ftp.ncbi.nlm.nih.gov/genomes/all/GCF/003/944/015/GCF_003944015.1_ASM394401v1
GCF_003944025.1	Y	MG_150	PRJNA224116	SAMN09631717	F	na	Streptococcus intermedius	Anginosus	Streptococcus intermedius	BCC34	Contig	2018/12/12	Clemson University	ftp://ftp.ncbi.nlm.nih.gov/genomes/all/GCF/003/944/025/GCF_003944025.1_ASM394402v1
GCF_000463355.1	Y	MG_150	PRJNA224116	SAMN02603659	F	representative genome	Streptococcus intermedius	Anginosus	Streptococcus intermedius B196	B196	Complete	2013/09/03	National Microbiology Laboratory, Public Health Agency of Canada	ftp://ftp.ncbi.nlm.nih.gov/genomes/all/GCF/000/463/355/GCF_000463355.1_ASM46335v1
GCF_900490715.1	Y	MG_150	PRJNA224116	SAMEA4733581	F	na	Streptococcus intermedius	Anginosus	Streptococcus intermedius B196	G1552	Contig	2018/08/21	URMITE	ftp://ftp.ncbi.nlm.nih.gov/genomes/all/GCF/900/490/715/GCF_900490715.1_G1552
GCF_900490725.1	Y	MG_150	PRJNA224116	SAMEA4733590	F	na	Streptococcus intermedius	Anginosus	Streptococcus intermedius B196	G1565	Contig	2018/08/21	URMITE	ftp://ftp.ncbi.nlm.nih.gov/genomes/all/GCF/900/490/725/GCF_900490725.1_G1565
GCF_900490735.1	Y	MG_150	PRJNA224116	SAMEA4733588	F	na	Streptococcus intermedius	Anginosus	Streptococcus intermedius B196	G1563	Contig	2018/08/21	URMITE	ftp://ftp.ncbi.nlm.nih.gov/genomes/all/GCF/900/490/735/GCF_900490735.1_G1563
GCF_900490745.1	Y	MG_150	PRJNA224116	SAMEA4733586	F	na	Streptococcus intermedius	Anginosus	Streptococcus intermedius B196	G1557	Contig	2018/08/21	URMITE	ftp://ftp.ncbi.nlm.nih.gov/genomes/all/GCF/900/490/745/GCF_900490745.1_G1557
GCF_900490785.1	Y	MG_150	PRJNA224116	SAMEA4733587	F	na	Streptococcus intermedius	Anginosus	Streptococcus intermedius B196	G1562	Contig	2018/08/21	URMITE	ftp://ftp.ncbi.nlm.nih.gov/genomes/all/GCF/900/490/785/GCF_900490785.1_G1562
GCF_900490795.1	Y	MG_150	PRJNA224116	SAMEA4733583	F	na	Streptococcus intermedius	Anginosus	Streptococcus intermedius B196	G1554	Contig	2018/08/21	URMITE	ftp://ftp.ncbi.nlm.nih.gov/genomes/all/GCF/900/490/795/GCF_900490795.1_G1554
GCF_900490805.1	Y	MG_150	PRJNA224116	SAMEA4733584	F	na	Streptococcus intermedius	Anginosus	Streptococcus intermedius B196	G1555	Contig	2018/08/21	URMITE	ftp://ftp.ncbi.nlm.nih.gov/genomes/all/GCF/900/490/805/GCF_900490805.1_G1555
GCF_900490855.1	Y	MG_150	PRJNA224116	SAMEA4733591	F	na	Streptococcus intermedius	Anginosus	Streptococcus intermedius B196	G1566	Contig	2018/08/21	URMITE	ftp://ftp.ncbi.nlm.nih.gov/genomes/all/GCF/900/490/855/GCF_900490855.1_G1566
GCF_900490865.1	Y	MG_150	PRJNA224116	SAMEA4733585	F	na	Streptococcus intermedius	Anginosus	Streptococcus intermedius B196	G1556	Contig	2018/08/21	URMITE	ftp://ftp.ncbi.nlm.nih.gov/genomes/all/GCF/900/490/865/GCF_900490865.1_G1556
GCF_900626305.1	Y	MG_150	PRJNA224116	SAMEA5142602	F	na	Streptococcus intermedius	Anginosus	Streptococcus intermedius B196	G1553	Contig	2018/12/06	URMITE	ftp://ftp.ncbi.nlm.nih.gov/genomes/all/GCF/900/626/305/GCF_900626305.1_PRJEB27335_G1553
GCF_000313655.1	Y	MG_150	PRJNA224116	SAMN02222948	F	na	Streptococcus intermedius	Anginosus	Streptococcus intermedius BA1	BA1	Contig	2012/11/20	Institute for Genome Sciences	ftp://ftp.ncbi.nlm.nih.gov/genomes/all/GCF/000/313/655/GCF_000313655.1_contig
GCF_000463385.1	Y	MG_150	PRJNA224116	SAMN02603658	F	na	Streptococcus intermedius	Anginosus	Streptococcus intermedius C270	C270	Complete	2013/09/03	National Microbiology Laboratory, Public Health Agency of Canada	ftp://ftp.ncbi.nlm.nih.gov/genomes/all/GCF/000/463/385/GCF_000463385.1_ASM46338v1
GCF_000234035.1	Y	MG_150	PRJNA224116	SAMN02463882	F	na	Streptococcus intermedius	Anginosus	Streptococcus intermedius F0413	F0413	Scaffold	2011/11/08	Broad Institute	ftp://ftp.ncbi.nlm.nih.gov/genomes/all/GCF/000/234/035/GCF_000234035.1_Stre_inte_F0413_V1
GCF_000306805.1	Y	MG_150	PRJNA224116	SAMD00060960	F	na	Streptococcus intermedius	Anginosus	Streptococcus intermedius JTH08	JTH08	Complete	2012/06/16	Juntendo University School of Medicine	ftp://ftp.ncbi.nlm.nih.gov/genomes/all/GCF/000/306/805/GCF_000306805.1_ASM30680v1
GCF_001074635.1	Y	MG_151	PRJNA224116	SAMN03198060	F	na	Streptococcus mitis	Mitis	Streptococcus mitis	850_SMIT	Contig	2015/07/10	University of Washington	ftp://ftp.ncbi.nlm.nih.gov/genomes/all/GCF/001/074/635/GCF_001074635.1_ASM107463v1
GCF_001113365.1	Y	MG_152	PRJNA224116	SAMEA1026083	F	na	Streptococcus pneumoniae	Mitis	Streptococcus pneumoniae	SMRU2014	Scaffold	2015/07/13	SC	ftp://ftp.ncbi.nlm.nih.gov/genomes/all/GCF/001/113/365/GCF_001113365.1_6823_7_22
GCF_003942585.1	Y	MG_153	PRJNA224116	SAMN09631754	F	na	Streptococcus oralis subsp. dentisani	Mitis	Streptococcus oralis	BCC59	Contig	2018/12/12	Clemson University	ftp://ftp.ncbi.nlm.nih.gov/genomes/all/GCF/003/942/585/GCF_003942585.1_ASM394258v1
GCF_001546795.1	Y	MG_154	PRJNA224116	SAMN03956209	F	na	Streptococcus mitis	Mitis	Streptococcus mitis	CMW7705B	Scaffold	2016/02/02	The Genome Institute at Washington University	ftp://ftp.ncbi.nlm.nih.gov/genomes/all/GCF/001/546/795/GCF_001546795.1_ASM154679v1
GCF_002860905.1	Y	MG_154	PRJNA224116	SAMN08193726	F	na	Streptococcus mitis	Mitis	Streptococcus oralis subsp. dentisani	UMB0832	Scaffold	2017/12/28	Loyola University Chicago	ftp://ftp.ncbi.nlm.nih.gov/genomes/all/GCF/002/860/905/GCF_002860905.1_ASM286090v1
GCF_002096835.1	Y	MG_155	PRJNA224116	SAMN06705602	F	na	Streptococcus mitis	Mitis	Streptococcus mitis	RH_43861_09	Scaffold	2017/04/18	Slagelse Hospital	ftp://ftp.ncbi.nlm.nih.gov/genomes/all/GCF/002/096/835/GCF_002096835.1_ASM209683v1
GCF_001068415.1	Y	MG_156	PRJNA224116	SAMN03196968	F	na	Streptococcus mutans	Mutans	Streptococcus mutans	1006_SMUT	Contig	2015/07/10	University of Washington	ftp://ftp.ncbi.nlm.nih.gov/genomes/all/GCF/001/068/415/GCF_001068415.1_ASM106841v1
GCF_001558215.1	Y	MG_156	PRJNA224116	SAMN04155244	F	na	Streptococcus mutans	Mutans	Streptococcus mutans	NG8	Complete	2016/02/11	University of Florida	ftp://ftp.ncbi.nlm.nih.gov/genomes/all/GCF/001/558/215/GCF_001558215.1_ASM155821v1
GCF_001625005.1	Y	MG_156	PRJNA224116	SAMN04420782	F	na	Streptococcus mutans	Mutans	Streptococcus mutans	ATCC 55676	Contig	2016/04/20	Texas A&M	ftp://ftp.ncbi.nlm.nih.gov/genomes/all/GCF/001/625/005/GCF_001625005.1_ASM162500v1
GCF_001703615.1	Y	MG_156	PRJNA224116	SAMN03835255	F	na	Streptococcus mutans	Mutans	Streptococcus mutans	AD01	Contig	2016/08/11	University of Camerino	ftp://ftp.ncbi.nlm.nih.gov/genomes/all/GCF/001/703/615/GCF_001703615.1_ASM170361v1
GCF_002083175.2	Y	MG_156	PRJNA224116	SAMN04875584	F	na	Streptococcus mutans	Mutans	Streptococcus mutans	FDAARGOS_258	Contig	2018/01/19	University of Maryland School of Medicine Institute for Genome Sciences (IGS) - sequencing center	ftp://ftp.ncbi.nlm.nih.gov/genomes/all/GCF/002/083/175/GCF_002083175.2_ASM208317v2
GCF_002155285.1	Y	MG_156	PRJNA224116	SAMN03263582	F	na	Streptococcus mutans	Mutans	Streptococcus mutans	KCOM 1054 (= ChDC YM3)	Chromosome	2017/05/22	Chosun University	ftp://ftp.ncbi.nlm.nih.gov/genomes/all/GCF/002/155/285/GCF_002155285.1_ASM215528v1
GCF_002157665.1	Y	MG_156	PRJNA224116	SAMD00078033	F	na	Streptococcus mutans	Mutans	Streptococcus mutans	HM	Scaffold	2017/05/01	Department of Pediatric Dentistry, Nagasaki University Graduate School of Biomedical Sciences	ftp://ftp.ncbi.nlm.nih.gov/genomes/all/GCF/002/157/665/GCF_002157665.1_ASM215766v1
GCF_002179995.1	Y	MG_156	PRJNA224116	SAMN06920495	F	na	Streptococcus mutans	Mutans	Streptococcus mutans	B14	Contig	2017/06/08	Madurai kamaraj university	ftp://ftp.ncbi.nlm.nih.gov/genomes/all/GCF/002/179/995/GCF_002179995.1_ASM217999v1
GCF_002212845.1	Y	MG_156	PRJNA224116	SAMN06464160	F	na	Streptococcus mutans	Mutans	Streptococcus mutans	PKUSS-6	Contig	2017/06/30	Peking University School of Stomatology	ftp://ftp.ncbi.nlm.nih.gov/genomes/all/GCF/002/212/845/GCF_002212845.1_ASM221284v1
GCF_002212925.1	Y	MG_156	PRJNA224116	SAMN06464162	F	na	Streptococcus mutans	Mutans	Streptococcus mutans	PKUSS-8	Contig	2017/06/30	Peking University School of Stomatology	ftp://ftp.ncbi.nlm.nih.gov/genomes/all/GCF/002/212/925/GCF_002212925.1_ASM221292v1
GCF_002212995.1	Y	MG_156	PRJNA224116	SAMN06464161	F	na	Streptococcus mutans	Mutans	Streptococcus mutans	PKUSS-7	Scaffold	2017/06/30	Peking University School of Stomatology	ftp://ftp.ncbi.nlm.nih.gov/genomes/all/GCF/002/212/995/GCF_002212995.1_ASM221299v1
GCF_002213005.1	Y	MG_156	PRJNA224116	SAMN06464157	F	na	Streptococcus mutans	Mutans	Streptococcus mutans	PKUSS-3	Contig	2017/06/30	Peking University School of Stomatology	ftp://ftp.ncbi.nlm.nih.gov/genomes/all/GCF/002/213/005/GCF_002213005.1_ASM221300v1
GCF_002995555.1	Y	MG_156	PRJNA224116	SAMN07671786	F	na	Streptococcus mutans	Mutans	Streptococcus mutans	LAR01	Complete	2018/03/13	University of Florida	ftp://ftp.ncbi.nlm.nih.gov/genomes/all/GCF/002/995/555/GCF_002995555.1_ASM299555v1
GCF_003466855.1	Y	MG_156	PRJNA224116	SAMN09736576	F	na	Streptococcus mutans	Mutans	Streptococcus mutans	AM44-1	Scaffold	2018/09/06	BGI	ftp://ftp.ncbi.nlm.nih.gov/genomes/all/GCF/003/466/855/GCF_003466855.1_ASM346685v1
GCF_900459345.1	Y	MG_156	PRJNA224116	SAMEA3307891	F	na	Streptococcus mutans	Mutans	Streptococcus mutans	NCTC10923	Contig	2018/08/01	SC	ftp://ftp.ncbi.nlm.nih.gov/genomes/all/GCF/900/459/345/GCF_900459345.1_36725_E02
GCF_900475095.1	Y	MG_156	PRJNA224116	SAMEA3614266	F	na	Streptococcus mutans	Mutans	Streptococcus mutans	NCTC10449	Complete	2018/06/17	SC	ftp://ftp.ncbi.nlm.nih.gov/genomes/all/GCF/900/475/095/GCF_900475095.1_42197_E01
GCF_900636835.1	Y	MG_156	PRJNA224116	SAMEA3871790	F	na	Streptococcus mutans	Mutans	Streptococcus mutans	NCTC10832	Complete	2018/12/20	SC	ftp://ftp.ncbi.nlm.nih.gov/genomes/all/GCF/900/636/835/GCF_900636835.1_44503_F02
GCF_000339695.1	Y	MG_156	PRJNA224116	SAMN02429037	F	na	Streptococcus mutans	Mutans	Streptococcus mutans 11A1	11A1	Contig	2013/02/11	Cornell University	ftp://ftp.ncbi.nlm.nih.gov/genomes/all/GCF/000/339/695/GCF_000339695.1_ASM33969v1
GCF_000339715.1	Y	MG_156	PRJNA224116	SAMN02429084	F	na	Streptococcus mutans	Mutans	Streptococcus mutans 11SSST2	11SSST2	Contig	2013/02/11	Cornell University	ftp://ftp.ncbi.nlm.nih.gov/genomes/all/GCF/000/339/715/GCF_000339715.1_ASM33971v1
GCF_000339255.1	Y	MG_156	PRJNA224116	SAMN02428928	F	na	Streptococcus mutans	Mutans	Streptococcus mutans 11VS1	11VS1	Contig	2013/02/11	Cornell University	ftp://ftp.ncbi.nlm.nih.gov/genomes/all/GCF/000/339/255/GCF_000339255.1_ASM33925v1
GCF_000339155.1	Y	MG_156	PRJNA224116	SAMN02429081	F	na	Streptococcus mutans	Mutans	Streptococcus mutans 15JP3	15JP3	Contig	2013/02/11	Cornell University	ftp://ftp.ncbi.nlm.nih.gov/genomes/all/GCF/000/339/155/GCF_000339155.1_ASM33915v1
GCF_000339235.1	Y	MG_156	PRJNA224116	SAMN02429086	F	na	Streptococcus mutans	Mutans	Streptococcus mutans 15VF2	15VF2	Contig	2013/02/11	Cornell University	ftp://ftp.ncbi.nlm.nih.gov/genomes/all/GCF/000/339/235/GCF_000339235.1_ASM33923v1
GCF_000340095.1	Y	MG_156	PRJNA224116	SAMN02429024	F	na	Streptococcus mutans	Mutans	Streptococcus mutans 1ID3	1ID3	Contig	2013/02/11	Cornell University	ftp://ftp.ncbi.nlm.nih.gov/genomes/all/GCF/000/340/095/GCF_000340095.1_ASM34009v1
GCF_000339655.1	Y	MG_156	PRJNA224116	SAMN02429082	F	na	Streptococcus mutans	Mutans	Streptococcus mutans 1SM1	1SM1	Contig	2013/02/11	Cornell University	ftp://ftp.ncbi.nlm.nih.gov/genomes/all/GCF/000/339/655/GCF_000339655.1_ASM33965v1
GCF_000340155.1	Y	MG_156	PRJNA224116	SAMN02428934	F	na	Streptococcus mutans	Mutans	Streptococcus mutans 24	24	Contig	2013/02/11	Cornell University	ftp://ftp.ncbi.nlm.nih.gov/genomes/all/GCF/000/340/155/GCF_000340155.1_ASM34015v1
GCF_000339195.1	Y	MG_156	PRJNA224116	SAMN02428984	F	na	Streptococcus mutans	Mutans	Streptococcus mutans 2ST1	2ST1	Contig	2013/02/11	Cornell University	ftp://ftp.ncbi.nlm.nih.gov/genomes/all/GCF/000/339/195/GCF_000339195.1_ASM33919v1
GCF_000339675.1	Y	MG_156	PRJNA224116	SAMN02429036	F	na	Streptococcus mutans	Mutans	Streptococcus mutans 3SN1	3SN1	Contig	2013/02/11	Cornell University	ftp://ftp.ncbi.nlm.nih.gov/genomes/all/GCF/000/339/675/GCF_000339675.1_ASM33967v1
GCF_000339175.1	Y	MG_156	PRJNA224116	SAMN02429083	F	na	Streptococcus mutans	Mutans	Streptococcus mutans 4SM1	4SM1	Contig	2013/02/11	Cornell University	ftp://ftp.ncbi.nlm.nih.gov/genomes/all/GCF/000/339/175/GCF_000339175.1_ASM33917v1
GCF_000339215.1	Y	MG_156	PRJNA224116	SAMN02429085	F	na	Streptococcus mutans	Mutans	Streptococcus mutans 4VF1	4VF1	Contig	2013/02/11	Cornell University	ftp://ftp.ncbi.nlm.nih.gov/genomes/all/GCF/000/339/215/GCF_000339215.1_ASM33921v1
GCF_000347795.1	Y	MG_156	PRJNA224116	SAMN02469959	F	na	Streptococcus mutans	Mutans	Streptococcus mutans 5DC8	5DC8	Contig	2013/03/21	Institute of Bioprocess and Biosystems Engineering	ftp://ftp.ncbi.nlm.nih.gov/genomes/all/GCF/000/347/795/GCF_000347795.1_5dc8_V1
GCF_000339275.1	Y	MG_156	PRJNA224116	SAMN02428985	F	na	Streptococcus mutans	Mutans	Streptococcus mutans 5SM3	5SM3	Contig	2013/02/11	Cornell University	ftp://ftp.ncbi.nlm.nih.gov/genomes/all/GCF/000/339/275/GCF_000339275.1_ASM33927v1
GCF_000340115.1	Y	MG_156	PRJNA224116	SAMN02428979	F	na	Streptococcus mutans	Mutans	Streptococcus mutans 66-2A	66-2A	Contig	2013/02/11	Cornell University	ftp://ftp.ncbi.nlm.nih.gov/genomes/all/GCF/000/340/115/GCF_000340115.1_ASM34011v1
GCF_000339775.1	Y	MG_156	PRJNA224116	SAMN02428930	F	na	Streptococcus mutans	Mutans	Streptococcus mutans A19	A19	Contig	2013/02/11	Cornell University	ftp://ftp.ncbi.nlm.nih.gov/genomes/all/GCF/000/339/775/GCF_000339775.1_ASM33977v1
GCF_000339315.1	Y	MG_156	PRJNA224116	SAMN02429025	F	na	Streptococcus mutans	Mutans	Streptococcus mutans A9	A9	Contig	2013/02/11	Cornell University	ftp://ftp.ncbi.nlm.nih.gov/genomes/all/GCF/000/339/315/GCF_000339315.1_ASM33931v1
GCF_000347855.1	Y	MG_156	PRJNA224116	SAMN02469957	F	na	Streptococcus mutans	Mutans	Streptococcus mutans AC4446	AC4446	Contig	2013/03/21	Institute of Bioprocess and Biosystems Engineering	ftp://ftp.ncbi.nlm.nih.gov/genomes/all/GCF/000/347/855/GCF_000347855.1_AC4446_V1
GCF_000522565.1	Y	MG_156	PRJNA224116	SAMN02641534	F	na	Streptococcus mutans	Mutans	Streptococcus mutans B05Sm11	B05Sm11	Contig	2014/01/24	New York University College of Dentistry	ftp://ftp.ncbi.nlm.nih.gov/genomes/all/GCF/000/522/565/GCF_000522565.1_out_k25_n4_samp01-contigs.fa
GCF_000522805.2	Y	MG_156	PRJNA224116	SAMN02641546	F	na	Streptococcus mutans	Mutans	Streptococcus mutans B06Sm2	B06Sm2	Contig	2014/01/24	New York University College of Dentistry	ftp://ftp.ncbi.nlm.nih.gov/genomes/all/GCF/000/522/805/GCF_000522805.2_out_k29_n4_samp15-contigs.fa
GCF_000522665.1	Y	MG_156	PRJNA224116	SAMN02641539	F	na	Streptococcus mutans	Mutans	Streptococcus mutans B07Sm2	B07Sm2	Contig	2014/01/24	New York University College of Dentistry	ftp://ftp.ncbi.nlm.nih.gov/genomes/all/GCF/000/522/665/GCF_000522665.1_out_k39_n4_samp06-contigs.fa
GCF_000522785.1	Y	MG_156	PRJNA224116	SAMN02641545	F	na	Streptococcus mutans	Mutans	Streptococcus mutans B082SM-A	B082SM-A	Contig	2014/01/24	New York University College of Dentistry	ftp://ftp.ncbi.nlm.nih.gov/genomes/all/GCF/000/522/785/GCF_000522785.1_out_k29_n4_samp14-contigs.fa
GCF_000522625.1	Y	MG_156	PRJNA224116	SAMN02641537	F	na	Streptococcus mutans	Mutans	Streptococcus mutans B084SM-A	B084SM-A	Contig	2014/01/24	New York University College of Dentistry	ftp://ftp.ncbi.nlm.nih.gov/genomes/all/GCF/000/522/625/GCF_000522625.1_out_k35_n4_samp04-contigs.fa
GCF_000522725.1	Y	MG_156	PRJNA224116	SAMN02641542	F	na	Streptococcus mutans	Mutans	Streptococcus mutans B102SM-B	B102SM-B	Contig	2014/01/24	New York University College of Dentistry	ftp://ftp.ncbi.nlm.nih.gov/genomes/all/GCF/000/522/725/GCF_000522725.1_out_k27_n4_samp09-contigs.fa
GCF_000522645.1	Y	MG_156	PRJNA224116	SAMN02641538	F	na	Streptococcus mutans	Mutans	Streptococcus mutans B107SM-B	B107SM-B	Contig	2014/01/24	New York University College of Dentistry	ftp://ftp.ncbi.nlm.nih.gov/genomes/all/GCF/000/522/645/GCF_000522645.1_out_k29_n4_samp05-contigs.fa
GCF_000522905.1	Y	MG_156	PRJNA224116	SAMN02641551	F	na	Streptococcus mutans	Mutans	Streptococcus mutans B111SM-A	B111SM-A	Contig	2014/01/24	New York University College of Dentistry	ftp://ftp.ncbi.nlm.nih.gov/genomes/all/GCF/000/522/905/GCF_000522905.1_out_k45_n4_samp20-contigs.fa
GCF_000522745.1	Y	MG_156	PRJNA224116	SAMN02641543	F	na	Streptococcus mutans	Mutans	Streptococcus mutans B112SM-A	B112SM-A	Contig	2014/01/24	New York University College of Dentistry	ftp://ftp.ncbi.nlm.nih.gov/genomes/all/GCF/000/522/745/GCF_000522745.1_out_k43_n4_samp10-contigs.fa
GCF_000522925.1	Y	MG_156	PRJNA224116	SAMN02641552	F	na	Streptococcus mutans	Mutans	Streptococcus mutans B114SM-A	B114SM-A	Contig	2014/01/24	New York University College of Dentistry	ftp://ftp.ncbi.nlm.nih.gov/genomes/all/GCF/000/522/925/GCF_000522925.1_out_k45_n4_samp21-contigs.fa
GCF_000522945.1	Y	MG_156	PRJNA224116	SAMN02641553	F	na	Streptococcus mutans	Mutans	Streptococcus mutans B115SM-A	B115SM-A	Contig	2014/01/24	New York University College of Dentistry	ftp://ftp.ncbi.nlm.nih.gov/genomes/all/GCF/000/522/945/GCF_000522945.1_out_k41_n4_samp22-contigs.fa
GCF_000522605.1	Y	MG_156	PRJNA224116	SAMN02641536	F	na	Streptococcus mutans	Mutans	Streptococcus mutans B12Sm1	B12Sm1	Contig	2014/01/24	New York University College of Dentistry	ftp://ftp.ncbi.nlm.nih.gov/genomes/all/GCF/000/522/605/GCF_000522605.1_out_k41_n4_samp03-contigs.fa
GCF_000522585.1	Y	MG_156	PRJNA224116	SAMN02641535	F	na	Streptococcus mutans	Mutans	Streptococcus mutans B13Sm1	B13Sm1	Contig	2014/01/24	New York University College of Dentistry	ftp://ftp.ncbi.nlm.nih.gov/genomes/all/GCF/000/522/585/GCF_000522585.1_out_k45_n4_samp02-contigs.fa
GCF_000522885.1	Y	MG_156	PRJNA224116	SAMN02641550	F	na	Streptococcus mutans	Mutans	Streptococcus mutans B23Sm1	B23Sm1	Contig	2014/01/24	New York University College of Dentistry	ftp://ftp.ncbi.nlm.nih.gov/genomes/all/GCF/000/522/885/GCF_000522885.1_out_k43_n4_samp19-contigs.fa
GCF_000522705.1	Y	MG_156	PRJNA224116	SAMN02641541	F	na	Streptococcus mutans	Mutans	Streptococcus mutans B24Sm2	B24Sm2	Contig	2014/01/24	New York University College of Dentistry	ftp://ftp.ncbi.nlm.nih.gov/genomes/all/GCF/000/522/705/GCF_000522705.1_out_k41_n4_samp08-contigs.fa
GCF_000522845.1	Y	MG_156	PRJNA224116	SAMN02641548	F	na	Streptococcus mutans	Mutans	Streptococcus mutans B88SM-A	B88SM-A	Contig	2014/01/24	New York University College of Dentistry	ftp://ftp.ncbi.nlm.nih.gov/genomes/all/GCF/000/522/845/GCF_000522845.1_out_k27_n4_samp17-contigs.fa
GCF_000339815.1	Y	MG_156	PRJNA224116	SAMN02428931	F	na	Streptococcus mutans	Mutans	Streptococcus mutans G123	G123	Contig	2013/02/11	Cornell University	ftp://ftp.ncbi.nlm.nih.gov/genomes/all/GCF/000/339/815/GCF_000339815.1_ASM33981v1
GCF_000271865.1	Y	MG_156	PRJNA224116	SAMN02603489	F	na	Streptococcus mutans	Mutans	Streptococcus mutans GS-5	GS-5	Complete	2012/06/25	KUMC	ftp://ftp.ncbi.nlm.nih.gov/genomes/all/GCF/000/271/865/GCF_000271865.1_ASM27186v1
GCF_000347835.1	Y	MG_156	PRJNA224116	SAMN02469955	F	na	Streptococcus mutans	Mutans	Streptococcus mutans KK23	KK23	Scaffold	2013/03/21	Institute of Bioprocess and Biosystems Engineering	ftp://ftp.ncbi.nlm.nih.gov/genomes/all/GCF/000/347/835/GCF_000347835.1_KK23_V1
GCF_000284575.1	Y	MG_156	PRJNA224116	SAMD00061051	F	na	Streptococcus mutans	Mutans	Streptococcus mutans LJ23	LJ23	Complete	2012/03/05	Tokyo Medical and Dental University Graduate School of Medical and Dental Sciences	ftp://ftp.ncbi.nlm.nih.gov/genomes/all/GCF/000/284/575/GCF_000284575.1_ASM28457v1
GCF_000339835.1	Y	MG_156	PRJNA224116	SAMN02429075	F	na	Streptococcus mutans	Mutans	Streptococcus mutans M21	M21	Contig	2013/02/11	Cornell University	ftp://ftp.ncbi.nlm.nih.gov/genomes/all/GCF/000/339/835/GCF_000339835.1_ASM33983v1
GCF_000339135.1	Y	MG_156	PRJNA224116	SAMN02428927	F	na	Streptococcus mutans	Mutans	Streptococcus mutans M230	M230	Contig	2013/02/11	Cornell University	ftp://ftp.ncbi.nlm.nih.gov/genomes/all/GCF/000/339/135/GCF_000339135.1_ASM33913v1
GCF_000339335.1	Y	MG_156	PRJNA224116	SAMN02429072	F	na	Streptococcus mutans	Mutans	Streptococcus mutans N29	N29	Contig	2013/02/11	Cornell University	ftp://ftp.ncbi.nlm.nih.gov/genomes/all/GCF/000/339/335/GCF_000339335.1_ASM33933v1
GCF_000339855.1	Y	MG_156	PRJNA224116	SAMN02428987	F	na	Streptococcus mutans	Mutans	Streptococcus mutans N34	N34	Contig	2013/02/11	Cornell University	ftp://ftp.ncbi.nlm.nih.gov/genomes/all/GCF/000/339/855/GCF_000339855.1_ASM33985v1
GCF_000339975.1	Y	MG_156	PRJNA224116	SAMN02428933	F	na	Streptococcus mutans	Mutans	Streptococcus mutans N66	N66	Contig	2013/02/11	Cornell University	ftp://ftp.ncbi.nlm.nih.gov/genomes/all/GCF/000/339/975/GCF_000339975.1_ASM33997v1
GCF_000347895.1	Y	MG_156	PRJNA224116	SAMN02469960	F	na	Streptococcus mutans	Mutans	Streptococcus mutans NCTC 11060	NCTC 11060	Contig	2013/03/21	Institute of Bioprocess and Biosystems Engineering	ftp://ftp.ncbi.nlm.nih.gov/genomes/all/GCF/000/347/895/GCF_000347895.1_NCTC11060_V1
GCF_000339395.1	Y	MG_156	PRJNA224116	SAMN02429027	F	na	Streptococcus mutans	Mutans	Streptococcus mutans NFSM1	NFSM1	Contig	2013/02/11	Cornell University	ftp://ftp.ncbi.nlm.nih.gov/genomes/all/GCF/000/339/395/GCF_000339395.1_ASM33939v1
GCF_000339295.1	Y	MG_156	PRJNA224116	SAMN02428986	F	na	Streptococcus mutans	Mutans	Streptococcus mutans NFSM2	NFSM2	Contig	2013/02/11	Cornell University	ftp://ftp.ncbi.nlm.nih.gov/genomes/all/GCF/000/339/295/GCF_000339295.1_ASM33929v1
GCF_000339895.1	Y	MG_156	PRJNA224116	SAMN02428932	F	na	Streptococcus mutans	Mutans	Streptococcus mutans NLML5	NLML5	Contig	2013/02/11	Cornell University	ftp://ftp.ncbi.nlm.nih.gov/genomes/all/GCF/000/339/895/GCF_000339895.1_ASM33989v1
GCF_000339495.1	Y	MG_156	PRJNA224116	SAMN02429068	F	na	Streptococcus mutans	Mutans	Streptococcus mutans NLML8	NLML8	Contig	2013/02/11	Cornell University	ftp://ftp.ncbi.nlm.nih.gov/genomes/all/GCF/000/339/495/GCF_000339495.1_ASM33949v1
GCF_000339915.1	Y	MG_156	PRJNA224116	SAMN02429076	F	na	Streptococcus mutans	Mutans	Streptococcus mutans NLML9	NLML9	Contig	2013/02/11	Cornell University	ftp://ftp.ncbi.nlm.nih.gov/genomes/all/GCF/000/339/915/GCF_000339915.1_ASM33991v1
GCF_000339355.1	Y	MG_156	PRJNA224116	SAMN02429073	F	na	Streptococcus mutans	Mutans	Streptococcus mutans NMT4863	NMT4863	Contig	2013/02/11	Cornell University	ftp://ftp.ncbi.nlm.nih.gov/genomes/all/GCF/000/339/355/GCF_000339355.1_ASM33935v1
GCF_000091645.1	Y	MG_156	PRJNA224116	SAMD00060939	F	na	Streptococcus mutans	Mutans	Streptococcus mutans NN2025	NN2025	Complete	2009/07/31	The Institute of Medical Science, Tokyo University	ftp://ftp.ncbi.nlm.nih.gov/genomes/all/GCF/000/091/645/GCF_000091645.1_ASM9164v1
GCF_000496535.1	Y	MG_156	PRJNA224116	SAMN02469427	F	na	Streptococcus mutans	Mutans	Streptococcus mutans PKUSS-HG01	PKUSS-HG01	Contig	2013/11/12	Beijing Institute of Genomics, Chinese Academy of Sciences	ftp://ftp.ncbi.nlm.nih.gov/genomes/all/GCF/000/496/535/GCF_000496535.1_Streptococcus_mutans_PKUSS-HG01
GCF_000496555.1	Y	MG_156	PRJNA224116	SAMN02469428	F	na	Streptococcus mutans	Mutans	Streptococcus mutans PKUSS-LG01	PKUSS-LG01	Contig	2013/11/12	Institute of Genomics, Chinese Academy of Sciences, Beijing	ftp://ftp.ncbi.nlm.nih.gov/genomes/all/GCF/000/496/555/GCF_000496555.1_Streptococcus_mutans_PKUSS-LG01
GCF_000339115.1	Y	MG_156	PRJNA224116	SAMN02429034	F	na	Streptococcus mutans	Mutans	Streptococcus mutans R221	R221	Contig	2013/02/11	Cornell University	ftp://ftp.ncbi.nlm.nih.gov/genomes/all/GCF/000/339/115/GCF_000339115.1_ASM33911v1
GCF_000339055.1	Y	MG_156	PRJNA224116	SAMN02428982	F	na	Streptococcus mutans	Mutans	Streptococcus mutans S1B	S1B	Contig	2013/02/11	Cornell University	ftp://ftp.ncbi.nlm.nih.gov/genomes/all/GCF/000/339/055/GCF_000339055.1_ASM33905v1
GCF_000339615.1	Y	MG_156	PRJNA224116	SAMN02428983	F	na	Streptococcus mutans	Mutans	Streptococcus mutans SA38	SA38	Contig	2013/02/11	Cornell University	ftp://ftp.ncbi.nlm.nih.gov/genomes/all/GCF/000/339/615/GCF_000339615.1_ASM33961v1
GCF_000339075.1	Y	MG_156	PRJNA224116	SAMN02429080	F	na	Streptococcus mutans	Mutans	Streptococcus mutans SA41	SA41	Contig	2013/02/11	Cornell University	ftp://ftp.ncbi.nlm.nih.gov/genomes/all/GCF/000/339/075/GCF_000339075.1_ASM33907v1
GCF_000340015.1	Y	MG_156	PRJNA224116	SAMN02429030	F	na	Streptococcus mutans	Mutans	Streptococcus mutans SF1	SF1	Contig	2013/02/11	Cornell University	ftp://ftp.ncbi.nlm.nih.gov/genomes/all/GCF/000/340/015/GCF_000340015.1_ASM34001v1
GCF_000339095.1	Y	MG_156	PRJNA224116	SAMN02429033	F	na	Streptococcus mutans	Mutans	Streptococcus mutans SF12	SF12	Contig	2013/02/11	Cornell University	ftp://ftp.ncbi.nlm.nih.gov/genomes/all/GCF/000/339/095/GCF_000339095.1_ASM33909v1
GCF_000339435.1	Y	MG_156	PRJNA224116	SAMN02429031	F	na	Streptococcus mutans	Mutans	Streptococcus mutans SF14	SF14	Contig	2013/02/11	Cornell University	ftp://ftp.ncbi.nlm.nih.gov/genomes/all/GCF/000/339/435/GCF_000339435.1_ASM33943v1
GCF_000339575.1	Y	MG_156	PRJNA224116	SAMN02428981	F	na	Streptococcus mutans	Mutans	Streptococcus mutans SM1	SM1	Contig	2013/02/11	Cornell University	ftp://ftp.ncbi.nlm.nih.gov/genomes/all/GCF/000/339/575/GCF_000339575.1_ASM33957v1
GCF_000340135.1	Y	MG_156	PRJNA224116	SAMN02428980	F	na	Streptococcus mutans	Mutans	Streptococcus mutans SM4	SM4	Contig	2013/02/11	Cornell University	ftp://ftp.ncbi.nlm.nih.gov/genomes/all/GCF/000/340/135/GCF_000340135.1_ASM34013v1
GCF_000339455.1	Y	MG_156	PRJNA224116	SAMN02429032	F	na	Streptococcus mutans	Mutans	Streptococcus mutans SM6	SM6	Contig	2013/02/11	Cornell University	ftp://ftp.ncbi.nlm.nih.gov/genomes/all/GCF/000/339/455/GCF_000339455.1_ASM33945v1
GCF_000340035.1	Y	MG_156	PRJNA224116	SAMN02429067	F	na	Streptococcus mutans	Mutans	Streptococcus mutans ST1	ST1	Contig	2013/02/11	Cornell University	ftp://ftp.ncbi.nlm.nih.gov/genomes/all/GCF/000/340/035/GCF_000340035.1_ASM34003v1
GCF_000340055.1	Y	MG_156	PRJNA224116	SAMN02428976	F	na	Streptococcus mutans	Mutans	Streptococcus mutans ST6	ST6	Contig	2013/02/11	Cornell University	ftp://ftp.ncbi.nlm.nih.gov/genomes/all/GCF/000/340/055/GCF_000340055.1_ASM34005v1
GCF_000522865.1	Y	MG_156	PRJNA224116	SAMN02641549	F	na	Streptococcus mutans	Mutans	Streptococcus mutans str. B16 P Sm1	B16 P Sm1	Contig	2014/01/24	New York University College of Dentistry	ftp://ftp.ncbi.nlm.nih.gov/genomes/all/GCF/000/522/865/GCF_000522865.1_out_k43_n4_samp18-contigs.fa
GCF_000339375.1	Y	MG_156	PRJNA224116	SAMN02429026	F	na	Streptococcus mutans	Mutans	Streptococcus mutans T4	T4	Contig	2013/02/11	Cornell University	ftp://ftp.ncbi.nlm.nih.gov/genomes/all/GCF/000/339/375/GCF_000339375.1_ASM33937v1
GCF_000228745.1	Y	MG_156	PRJNA224116	SAMN02436614	F	na	Streptococcus mutans	Mutans	Streptococcus mutans TCI-101	TCI-101	Contig	2011/10/06	JCVI	ftp://ftp.ncbi.nlm.nih.gov/genomes/all/GCF/000/228/745/GCF_000228745.1_SMUT4-NEX_2-101
GCF_000228785.1	Y	MG_156	PRJNA224116	SAMN02436346	F	na	Streptococcus mutans	Mutans	Streptococcus mutans TCI-11	TCI-11	Contig	2011/10/06	JCVI	ftp://ftp.ncbi.nlm.nih.gov/genomes/all/GCF/000/228/785/GCF_000228785.1_SMUT3-NEX_4-11
GCF_000228805.1	Y	MG_156	PRJNA224116	SAMN02436598	F	na	Streptococcus mutans	Mutans	Streptococcus mutans TCI-110	TCI-110	Contig	2011/10/06	JCVI	ftp://ftp.ncbi.nlm.nih.gov/genomes/all/GCF/000/228/805/GCF_000228805.1_SMUT4-NEX_4-110
GCF_000228825.1	Y	MG_156	PRJNA224116	SAMN02436347	F	na	Streptococcus mutans	Mutans	Streptococcus mutans TCI-116	TCI-116	Contig	2011/10/06	JCVI	ftp://ftp.ncbi.nlm.nih.gov/genomes/all/GCF/000/228/825/GCF_000228825.1_SMUT4-NEX_5-116
GCF_000228885.1	Y	MG_156	PRJNA224116	SAMN02436444	F	na	Streptococcus mutans	Mutans	Streptococcus mutans TCI-125	TCI-125	Contig	2011/10/06	JCVI	ftp://ftp.ncbi.nlm.nih.gov/genomes/all/GCF/000/228/885/GCF_000228885.1_SMUT4-NEX_9-125
GCF_000228925.1	Y	MG_156	PRJNA224116	SAMN02436446	F	na	Streptococcus mutans	Mutans	Streptococcus mutans TCI-143	TCI-143	Contig	2011/10/06	JCVI	ftp://ftp.ncbi.nlm.nih.gov/genomes/all/GCF/000/228/925/GCF_000228925.1_SMUT4-NEX_11-143
GCF_000228945.1	Y	MG_156	PRJNA224116	SAMN02436447	F	na	Streptococcus mutans	Mutans	Streptococcus mutans TCI-145	TCI-145	Contig	2011/10/06	JCVI	ftp://ftp.ncbi.nlm.nih.gov/genomes/all/GCF/000/228/945/GCF_000228945.1_SMUT4-NEX_12-145
GCF_000228965.1	Y	MG_156	PRJNA224116	SAMN02436345	F	na	Streptococcus mutans	Mutans	Streptococcus mutans TCI-146	TCI-146	Contig	2011/10/06	JCVI	ftp://ftp.ncbi.nlm.nih.gov/genomes/all/GCF/000/228/965/GCF_000228965.1_SMUT4-NEX_21-146
GCF_000228985.1	Y	MG_156	PRJNA224116	SAMN02436531	F	na	Streptococcus mutans	Mutans	Streptococcus mutans TCI-148	TCI-148	Contig	2011/10/06	JCVI	ftp://ftp.ncbi.nlm.nih.gov/genomes/all/GCF/000/228/985/GCF_000228985.1_SMUT4-NEX_25-148
GCF_000229005.1	Y	MG_156	PRJNA224116	SAMN02436512	F	na	Streptococcus mutans	Mutans	Streptococcus mutans TCI-149	TCI-149	Contig	2011/10/06	JCVI	ftp://ftp.ncbi.nlm.nih.gov/genomes/all/GCF/000/229/005/GCF_000229005.1_SMUT4-NEX_34-149
GCF_000229045.1	Y	MG_156	PRJNA224116	SAMN02436602	F	na	Streptococcus mutans	Mutans	Streptococcus mutans TCI-152	TCI-152	Contig	2011/10/06	JCVI	ftp://ftp.ncbi.nlm.nih.gov/genomes/all/GCF/000/229/045/GCF_000229045.1_SMUT4-NEX_57-152
GCF_000229125.1	Y	MG_156	PRJNA224116	SAMN02436449	F	na	Streptococcus mutans	Mutans	Streptococcus mutans TCI-163	TCI-163	Contig	2011/10/06	JCVI	ftp://ftp.ncbi.nlm.nih.gov/genomes/all/GCF/000/229/125/GCF_000229125.1_SMUT5-NEX_4-163
GCF_000229145.1	Y	MG_156	PRJNA224116	SAMN02436604	F	na	Streptococcus mutans	Mutans	Streptococcus mutans TCI-164	TCI-164	Contig	2011/10/06	JCVI	ftp://ftp.ncbi.nlm.nih.gov/genomes/all/GCF/000/229/145/GCF_000229145.1_SMUT5-NEX_5-164
GCF_000229185.1	Y	MG_156	PRJNA224116	SAMN02436605	F	na	Streptococcus mutans	Mutans	Streptococcus mutans TCI-170	TCI-170	Contig	2011/10/06	JCVI	ftp://ftp.ncbi.nlm.nih.gov/genomes/all/GCF/000/229/185/GCF_000229185.1_SMUT5-NEX_7-170
GCF_000229205.1	Y	MG_156	PRJNA224116	SAMN02436513	F	na	Streptococcus mutans	Mutans	Streptococcus mutans TCI-173	TCI-173	Contig	2011/10/06	JCVI	ftp://ftp.ncbi.nlm.nih.gov/genomes/all/GCF/000/229/205/GCF_000229205.1_SMUT5-NEX_9-173
GCF_000229225.1	Y	MG_156	PRJNA224116	SAMN02436514	F	na	Streptococcus mutans	Mutans	Streptococcus mutans TCI-176	TCI-176	Contig	2011/10/06	JCVI	ftp://ftp.ncbi.nlm.nih.gov/genomes/all/GCF/000/229/225/GCF_000229225.1_SMUT5-NEX_12-176
GCF_000229245.1	Y	MG_156	PRJNA224116	SAMN02436606	F	na	Streptococcus mutans	Mutans	Streptococcus mutans TCI-177	TCI-177	Contig	2011/10/06	JCVI	ftp://ftp.ncbi.nlm.nih.gov/genomes/all/GCF/000/229/245/GCF_000229245.1_SMUT5-NEX_21-177
GCF_000229285.1	Y	MG_156	PRJNA224116	SAMN02436351	F	na	Streptococcus mutans	Mutans	Streptococcus mutans TCI-187	TCI-187	Contig	2011/10/06	JCVI	ftp://ftp.ncbi.nlm.nih.gov/genomes/all/GCF/000/229/285/GCF_000229285.1_SMUT5-NEX_57-187
GCF_000229305.1	Y	MG_156	PRJNA224116	SAMN02436352	F	na	Streptococcus mutans	Mutans	Streptococcus mutans TCI-191	TCI-191	Contig	2011/10/06	JCVI	ftp://ftp.ncbi.nlm.nih.gov/genomes/all/GCF/000/229/305/GCF_000229305.1_SMUT5-NEX_62-191
GCF_000229365.1	Y	MG_156	PRJNA224116	SAMN02436515	F	na	Streptococcus mutans	Mutans	Streptococcus mutans TCI-202	TCI-202	Contig	2011/10/06	JCVI	ftp://ftp.ncbi.nlm.nih.gov/genomes/all/GCF/000/229/365/GCF_000229365.1_SMUT6-NEX_3-202
GCF_000229385.1	Y	MG_156	PRJNA224116	SAMN02436354	F	na	Streptococcus mutans	Mutans	Streptococcus mutans TCI-204	TCI-204	Contig	2011/10/06	JCVI	ftp://ftp.ncbi.nlm.nih.gov/genomes/all/GCF/000/229/385/GCF_000229385.1_SMUT6-NEX_4-204
GCF_000229425.1	Y	MG_156	PRJNA224116	SAMN02436452	F	na	Streptococcus mutans	Mutans	Streptococcus mutans TCI-212	TCI-212	Contig	2011/10/06	JCVI	ftp://ftp.ncbi.nlm.nih.gov/genomes/all/GCF/000/229/425/GCF_000229425.1_SMUT6-NEX_6-212
GCF_000229445.1	Y	MG_156	PRJNA224116	SAMN02436516	F	na	Streptococcus mutans	Mutans	Streptococcus mutans TCI-218	TCI-218	Contig	2011/10/06	JCVI	ftp://ftp.ncbi.nlm.nih.gov/genomes/all/GCF/000/229/445/GCF_000229445.1_SMUT6-NEX_8-218
GCF_000229465.1	Y	MG_156	PRJNA224116	SAMN02436607	F	na	Streptococcus mutans	Mutans	Streptococcus mutans TCI-219	TCI-219	Contig	2011/10/06	JCVI	ftp://ftp.ncbi.nlm.nih.gov/genomes/all/GCF/000/229/465/GCF_000229465.1_SMUT6-NEX_9-219
GCF_000229485.1	Y	MG_156	PRJNA224116	SAMN02436453	F	na	Streptococcus mutans	Mutans	Streptococcus mutans TCI-220	TCI-220	Contig	2011/10/06	JCVI	ftp://ftp.ncbi.nlm.nih.gov/genomes/all/GCF/000/229/485/GCF_000229485.1_SMUT6-NEX_10-220
GCF_000229525.1	Y	MG_156	PRJNA224116	SAMN02436517	F	na	Streptococcus mutans	Mutans	Streptococcus mutans TCI-223	TCI-223	Contig	2011/10/06	JCVI	ftp://ftp.ncbi.nlm.nih.gov/genomes/all/GCF/000/229/525/GCF_000229525.1_SMUT6-NEX_12-223
GCF_000229545.1	Y	MG_156	PRJNA224116	SAMN02436355	F	na	Streptococcus mutans	Mutans	Streptococcus mutans TCI-224	TCI-224	Contig	2011/10/06	JCVI	ftp://ftp.ncbi.nlm.nih.gov/genomes/all/GCF/000/229/545/GCF_000229545.1_SMUT6-NEX_21-224
GCF_000229585.1	Y	MG_156	PRJNA224116	SAMN02436518	F	na	Streptococcus mutans	Mutans	Streptococcus mutans TCI-228	TCI-228	Contig	2011/10/06	JCVI	ftp://ftp.ncbi.nlm.nih.gov/genomes/all/GCF/000/229/585/GCF_000229585.1_SMUT6-NEX_34-228
GCF_000229605.1	Y	MG_156	PRJNA224116	SAMN02436608	F	na	Streptococcus mutans	Mutans	Streptococcus mutans TCI-234	TCI-234	Contig	2011/10/06	JCVI	ftp://ftp.ncbi.nlm.nih.gov/genomes/all/GCF/000/229/605/GCF_000229605.1_SMUT6-NEX_50-234
GCF_000229625.1	Y	MG_156	PRJNA224116	SAMN02436609	F	na	Streptococcus mutans	Mutans	Streptococcus mutans TCI-239	TCI-239	Contig	2011/10/06	JCVI	ftp://ftp.ncbi.nlm.nih.gov/genomes/all/GCF/000/229/625/GCF_000229625.1_SMUT6-NEX_57-239
GCF_000229685.1	Y	MG_156	PRJNA224116	SAMN02436436	F	na	Streptococcus mutans	Mutans	Streptococcus mutans TCI-244	TCI-244	Contig	2011/10/06	JCVI	ftp://ftp.ncbi.nlm.nih.gov/genomes/all/GCF/000/229/685/GCF_000229685.1_SMUT6-NEX_93-244
GCF_000229705.1	Y	MG_156	PRJNA224116	SAMN02436437	F	na	Streptococcus mutans	Mutans	Streptococcus mutans TCI-249	TCI-249	Contig	2011/10/06	JCVI	ftp://ftp.ncbi.nlm.nih.gov/genomes/all/GCF/000/229/705/GCF_000229705.1_SMUT7-NEX_2-249
GCF_000229725.1	Y	MG_156	PRJNA224116	SAMN02436520	F	na	Streptococcus mutans	Mutans	Streptococcus mutans TCI-256	TCI-256	Contig	2011/10/06	JCVI	ftp://ftp.ncbi.nlm.nih.gov/genomes/all/GCF/000/229/725/GCF_000229725.1_SMUT7-NEX_4-256
GCF_000229785.1	Y	MG_156	PRJNA224116	SAMN02436439	F	na	Streptococcus mutans	Mutans	Streptococcus mutans TCI-267	TCI-267	Contig	2011/10/06	JCVI	ftp://ftp.ncbi.nlm.nih.gov/genomes/all/GCF/000/229/785/GCF_000229785.1_SMUT7-NEX_7-267
GCF_000229805.1	Y	MG_156	PRJNA224116	SAMN02436521	F	na	Streptococcus mutans	Mutans	Streptococcus mutans TCI-268	TCI-268	Contig	2011/10/06	JCVI	ftp://ftp.ncbi.nlm.nih.gov/genomes/all/GCF/000/229/805/GCF_000229805.1_SMUT7-NEX_8-268
GCF_000229845.1	Y	MG_156	PRJNA224116	SAMN02436440	F	na	Streptococcus mutans	Mutans	Streptococcus mutans TCI-279	TCI-279	Contig	2011/10/06	JCVI	ftp://ftp.ncbi.nlm.nih.gov/genomes/all/GCF/000/229/845/GCF_000229845.1_SMUT7-NEX_10-279
GCF_000229945.1	Y	MG_156	PRJNA224116	SAMN02436523	F	na	Streptococcus mutans	Mutans	Streptococcus mutans TCI-298	TCI-298	Contig	2011/10/06	JCVI	ftp://ftp.ncbi.nlm.nih.gov/genomes/all/GCF/000/229/945/GCF_000229945.1_SMUT7-NEX_34-298
GCF_000230065.1	Y	MG_156	PRJNA224116	SAMN02436362	F	na	Streptococcus mutans	Mutans	Streptococcus mutans TCI-70	TCI-70	Contig	2011/10/06	JCVI	ftp://ftp.ncbi.nlm.nih.gov/genomes/all/GCF/000/230/065/GCF_000230065.1_SMUT3-NEX_11-70
GCF_000230165.1	Y	MG_156	PRJNA224116	SAMN02436525	F	na	Streptococcus mutans	Mutans	Streptococcus mutans TCI-86	TCI-86	Contig	2011/10/06	JCVI	ftp://ftp.ncbi.nlm.nih.gov/genomes/all/GCF/000/230/165/GCF_000230165.1_SMUT3-NEX_57-86
GCF_000230205.1	Y	MG_156	PRJNA224116	SAMN02436526	F	na	Streptococcus mutans	Mutans	Streptococcus mutans TCI-96	TCI-96	Contig	2011/10/06	JCVI	ftp://ftp.ncbi.nlm.nih.gov/genomes/all/GCF/000/230/205/GCF_000230205.1_SMUT3-NEX_93-96
GCF_000339475.1	Y	MG_156	PRJNA224116	SAMN02428977	F	na	Streptococcus mutans	Mutans	Streptococcus mutans U2A	U2A	Contig	2013/02/11	Cornell University	ftp://ftp.ncbi.nlm.nih.gov/genomes/all/GCF/000/339/475/GCF_000339475.1_ASM33947v1
GCF_000007465.2	Y	MG_156	PRJNA57947	SAMN02604090	F	reference genome	Streptococcus mutans	Mutans	Streptococcus mutans UA159	UA159	Complete	2011/09/01	Univ. Oklahoma	ftp://ftp.ncbi.nlm.nih.gov/genomes/all/GCF/000/007/465/GCF_000007465.2_ASM746v2
GCF_002355215.1	Y	MG_156	PRJNA224116	SAMD00017730	F	na	Streptococcus troglodytae	Mutans	Streptococcus troglodytae	TKU 31	Complete	2015/02/05	Tsurumi University, School of Dental Medicine	ftp://ftp.ncbi.nlm.nih.gov/genomes/all/GCF/002/355/215/GCF_002355215.1_ASM235521v1
GCF_900411395.1	Y	MG_157	PRJNA224116	SAMEA4665895	F	na	Streptococcus sp.	Mitis	Streptococcus sp. 596553	596553	Scaffold	2018/05/31	inki	ftp://ftp.ncbi.nlm.nih.gov/genomes/all/GCF/900/411/395/GCF_900411395.1_596553
GCF_001068775.1	Y	MG_158	PRJNA224116	SAMN03197129	F	na	Streptococcus infantis	Mitis	Streptococcus pseudopneumoniae	1172_SPSE	Contig	2015/07/10	University of Washington	ftp://ftp.ncbi.nlm.nih.gov/genomes/all/GCF/001/068/775/GCF_001068775.1_ASM106877v1
GCF_001812125.1	Y	MG_158	PRJNA224116	SAMN04477649	F	na	Streptococcus sp.	Mitis	Streptococcus sp. HMSC071D03	HMSC071D03	Scaffold	2016/10/21	The Genome Institute at Washington University	ftp://ftp.ncbi.nlm.nih.gov/genomes/all/GCF/001/812/125/GCF_001812125.1_ASM181212v1
GCF_003943395.1	Y	MG_159	PRJNA224116	SAMN09631694	F	na	Streptococcus oralis subsp. dentisani	Mitis	Streptococcus oralis	BCC12	Contig	2018/12/12	Clemson University	ftp://ftp.ncbi.nlm.nih.gov/genomes/all/GCF/003/943/395/GCF_003943395.1_ASM394339v1
GCF_001073285.1	Y	MG_16	PRJNA224116	SAMN03197749	F	na	Streptococcus sanguinis	Mitis	Streptococcus cristatus	550_SOLI	Contig	2015/07/10	University of Washington	ftp://ftp.ncbi.nlm.nih.gov/genomes/all/GCF/001/073/285/GCF_001073285.1_ASM107328v1
GCF_002860765.1	Y	MG_16	PRJNA224116	SAMN08193733	F	na	Streptococcus salivarius	Mitis	Streptococcus salivarius	UMB0028	Scaffold	2017/12/28	Loyola University Chicago	ftp://ftp.ncbi.nlm.nih.gov/genomes/all/GCF/002/860/765/GCF_002860765.1_ASM286076v1
GCF_001071805.1	Y	MG_16	PRJNA224116	SAMN03197408	F	na	Streptococcus sanguinis	Mitis	Streptococcus sanguinis	216_SSAN	Contig	2015/07/10	University of Washington	ftp://ftp.ncbi.nlm.nih.gov/genomes/all/GCF/001/071/805/GCF_001071805.1_ASM107180v1
GCF_001074035.1	Y	MG_16	PRJNA224116	SAMN03197916	F	na	Streptococcus sanguinis	Mitis	Streptococcus sanguinis	711_SSAN	Contig	2015/07/10	University of Washington	ftp://ftp.ncbi.nlm.nih.gov/genomes/all/GCF/001/074/035/GCF_001074035.1_ASM107403v1
GCF_001588715.1	Y	MG_16	PRJNA224116	SAMN03480686	F	na	Streptococcus sanguinis	Mitis	Streptococcus sanguinis	MB451	Contig	2016/03/11	University of Malaya	ftp://ftp.ncbi.nlm.nih.gov/genomes/all/GCF/001/588/715/GCF_001588715.1_ASM158871v1
GCF_001588875.1	Y	MG_16	PRJNA224116	SAMN03480635	F	na	Streptococcus sanguinis	Mitis	Streptococcus sanguinis	FSS4	Contig	2016/03/11	University of Malaya	ftp://ftp.ncbi.nlm.nih.gov/genomes/all/GCF/001/588/875/GCF_001588875.1_ASM158887v1
GCF_001588895.1	Y	MG_16	PRJNA224116	SAMN03480643	F	na	Streptococcus sanguinis	Mitis	Streptococcus sanguinis	FSS9	Contig	2016/03/11	University of Malaya	ftp://ftp.ncbi.nlm.nih.gov/genomes/all/GCF/001/588/895/GCF_001588895.1_ASM158889v1
GCF_001589015.1	Y	MG_16	PRJNA224116	SAMN03480699	F	na	Streptococcus sanguinis	Mitis	Streptococcus sanguinis	PJM8	Contig	2016/03/11	University of Malaya	ftp://ftp.ncbi.nlm.nih.gov/genomes/all/GCF/001/589/015/GCF_001589015.1_ASM158901v1
GCF_003858565.1	Y	MG_16	PRJNA224116	SAMN10478698	F	na	Streptococcus sanguinis	Mitis	Streptococcus sanguinis	OH953	Contig	2018/12/03	UC Davis	ftp://ftp.ncbi.nlm.nih.gov/genomes/all/GCF/003/858/565/GCF_003858565.1_ASM385856v1
GCF_003942265.1	Y	MG_16	PRJNA224116	SAMN09631775	F	na	Streptococcus sanguinis	Mitis	Streptococcus sanguinis	BCC24	Contig	2018/12/12	Clemson University	ftp://ftp.ncbi.nlm.nih.gov/genomes/all/GCF/003/942/265/GCF_003942265.1_ASM394226v1
GCF_003942295.1	Y	MG_16	PRJNA224116	SAMN09631776	F	na	Streptococcus sanguinis	Mitis	Streptococcus sanguinis	BCC25	Contig	2018/12/12	Clemson University	ftp://ftp.ncbi.nlm.nih.gov/genomes/all/GCF/003/942/295/GCF_003942295.1_ASM394229v1
GCF_003942305.1	Y	MG_16	PRJNA224116	SAMN09631781	F	na	Streptococcus sanguinis	Mitis	Streptococcus sanguinis	KLC08	Contig	2018/12/12	Clemson University	ftp://ftp.ncbi.nlm.nih.gov/genomes/all/GCF/003/942/305/GCF_003942305.1_ASM394230v1
GCF_003942365.1	Y	MG_16	PRJNA224116	SAMN09631773	F	na	Streptococcus sanguinis	Mitis	Streptococcus sanguinis	BCC20	Contig	2018/12/12	Clemson University	ftp://ftp.ncbi.nlm.nih.gov/genomes/all/GCF/003/942/365/GCF_003942365.1_ASM394236v1
GCF_003942375.1	Y	MG_16	PRJNA224116	SAMN09631772	F	na	Streptococcus sanguinis	Mitis	Streptococcus sanguinis	BCC18	Contig	2018/12/12	Clemson University	ftp://ftp.ncbi.nlm.nih.gov/genomes/all/GCF/003/942/375/GCF_003942375.1_ASM394237v1
GCF_003942385.1	Y	MG_16	PRJNA224116	SAMN09631771	F	na	Streptococcus sanguinis	Mitis	Streptococcus sanguinis	BCC16	Contig	2018/12/12	Clemson University	ftp://ftp.ncbi.nlm.nih.gov/genomes/all/GCF/003/942/385/GCF_003942385.1_ASM394238v1
GCF_003942405.1	Y	MG_16	PRJNA224116	SAMN09631766	F	na	Streptococcus sanguinis	Mitis	Streptococcus sanguinis	BCC61	Contig	2018/12/12	Clemson University	ftp://ftp.ncbi.nlm.nih.gov/genomes/all/GCF/003/942/405/GCF_003942405.1_ASM394240v1
GCF_003942415.1	Y	MG_16	PRJNA224116	SAMN09631767	F	na	Streptococcus sanguinis	Mitis	Streptococcus sanguinis	BCC64	Contig	2018/12/12	Clemson University	ftp://ftp.ncbi.nlm.nih.gov/genomes/all/GCF/003/942/415/GCF_003942415.1_ASM394241v1
GCF_003942475.1	Y	MG_16	PRJNA224116	SAMN09631763	F	na	Streptococcus sanguinis	Mitis	Streptococcus sanguinis	BCC46	Contig	2018/12/12	Clemson University	ftp://ftp.ncbi.nlm.nih.gov/genomes/all/GCF/003/942/475/GCF_003942475.1_ASM394247v1
GCF_003942485.1	Y	MG_16	PRJNA224116	SAMN09631761	F	na	Streptococcus sanguinis	Mitis	Streptococcus sanguinis	BCC37	Contig	2018/12/12	Clemson University	ftp://ftp.ncbi.nlm.nih.gov/genomes/all/GCF/003/942/485/GCF_003942485.1_ASM394248v1
GCF_003943715.1	Y	MG_16	PRJNA224116	SAMN09631774	F	na	Streptococcus sanguinis	Mitis	Streptococcus sanguinis	BCC23	Contig	2018/12/12	Clemson University	ftp://ftp.ncbi.nlm.nih.gov/genomes/all/GCF/003/943/715/GCF_003943715.1_ASM394371v1
GCF_003943735.1	Y	MG_16	PRJNA224116	SAMN09631769	F	na	Streptococcus sanguinis	Mitis	Streptococcus sanguinis	BCC04	Contig	2018/12/12	Clemson University	ftp://ftp.ncbi.nlm.nih.gov/genomes/all/GCF/003/943/735/GCF_003943735.1_ASM394373v1
GCF_003943755.1	Y	MG_16	PRJNA224116	SAMN09631768	F	na	Streptococcus sanguinis	Mitis	Streptococcus sanguinis	BCC03	Contig	2018/12/12	Clemson University	ftp://ftp.ncbi.nlm.nih.gov/genomes/all/GCF/003/943/755/GCF_003943755.1_ASM394375v1
GCF_003943785.1	Y	MG_16	PRJNA224116	SAMN09631765	F	na	Streptococcus sanguinis	Mitis	Streptococcus sanguinis	BCC54	Contig	2018/12/12	Clemson University	ftp://ftp.ncbi.nlm.nih.gov/genomes/all/GCF/003/943/785/GCF_003943785.1_ASM394378v1
GCF_003944405.1	Y	MG_16	PRJNA224116	SAMN09631784	F	na	Streptococcus sanguinis	Mitis	Streptococcus sanguinis	BCA13	Contig	2018/12/12	Clemson University	ftp://ftp.ncbi.nlm.nih.gov/genomes/all/GCF/003/944/405/GCF_003944405.1_ASM394440v1
GCF_003944415.1	Y	MG_16	PRJNA224116	SAMN09631783	F	na	Streptococcus sanguinis	Mitis	Streptococcus sanguinis	BCA3	Contig	2018/12/12	Clemson University	ftp://ftp.ncbi.nlm.nih.gov/genomes/all/GCF/003/944/415/GCF_003944415.1_ASM394441v1
GCF_003944475.1	Y	MG_16	PRJNA224116	SAMN09631779	F	na	Streptococcus sanguinis	Mitis	Streptococcus sanguinis	KLC03	Contig	2018/12/12	Clemson University	ftp://ftp.ncbi.nlm.nih.gov/genomes/all/GCF/003/944/475/GCF_003944475.1_ASM394447v1
GCF_003944485.1	Y	MG_16	PRJNA224116	SAMN09631782	F	na	Streptococcus sanguinis	Mitis	Streptococcus sanguinis	KLC10	Contig	2018/12/12	Clemson University	ftp://ftp.ncbi.nlm.nih.gov/genomes/all/GCF/003/944/485/GCF_003944485.1_ASM394448v1
GCF_900475275.1	Y	MG_16	PRJNA224116	SAMEA3649033	F	na	Streptococcus sanguinis	Mitis	Streptococcus sanguinis	NCTC11086	Complete	2018/06/17	SC	ftp://ftp.ncbi.nlm.nih.gov/genomes/all/GCF/900/475/275/GCF_900475275.1_42685_F01
GCF_900475505.1	Y	MG_16	PRJNA224116	SAMEA3672886	F	na	Streptococcus sanguinis	Mitis	Streptococcus sanguinis	NCTC7863	Complete	2018/06/17	SC	ftp://ftp.ncbi.nlm.nih.gov/genomes/all/GCF/900/475/505/GCF_900475505.1_42925_G01
GCF_000507745.1	Y	MG_16	PRJNA224116	SAMN01162043	F	na	Streptococcus sanguinis	Mitis	Streptococcus sanguinis CC94A	CC94A	Scaffold	2013/12/13	Broad Institute	ftp://ftp.ncbi.nlm.nih.gov/genomes/all/GCF/000/507/745/GCF_000507745.1_Stre_sang_CC94A_V1
GCF_000212835.1	Y	MG_16	PRJNA224116	SAMN00253325	F	na	Streptococcus sanguinis	Mitis	Streptococcus sanguinis SK1056	SK1056	Scaffold	2011/05/11	Baylor College of Medicine	ftp://ftp.ncbi.nlm.nih.gov/genomes/all/GCF/000/212/835/GCF_000212835.1_ASM21283v1
GCF_000194965.1	Y	MG_16	PRJNA224116	SAMN00253315	F	na	Streptococcus sanguinis	Mitis	Streptococcus sanguinis SK1057	SK1057	Scaffold	2011/04/07	Baylor College of Medicine	ftp://ftp.ncbi.nlm.nih.gov/genomes/all/GCF/000/194/965/GCF_000194965.1_ASM19496v1
GCF_000195125.1	Y	MG_16	PRJNA224116	SAMN00253321	F	na	Streptococcus sanguinis	Mitis	Streptococcus sanguinis SK1058	SK1058	Scaffold	2011/04/08	Baylor College of Medicine	ftp://ftp.ncbi.nlm.nih.gov/genomes/all/GCF/000/195/125/GCF_000195125.1_ASM19512v1
GCF_000204475.1	Y	MG_16	PRJNA224116	SAMN00253322	F	na	Streptococcus sanguinis	Mitis	Streptococcus sanguinis SK1087	SK1087	Scaffold	2011/04/18	Baylor College of Medicine	ftp://ftp.ncbi.nlm.nih.gov/genomes/all/GCF/000/204/475/GCF_000204475.1_ASM20447v1
GCF_000192205.1	Y	MG_16	PRJNA224116	SAMN00253314	F	na	Streptococcus sanguinis	Mitis	Streptococcus sanguinis SK115	SK115	Scaffold	2011/03/16	Baylor College of Medicine	ftp://ftp.ncbi.nlm.nih.gov/genomes/all/GCF/000/192/205/GCF_000192205.1_ASM19220v1
GCF_000192245.1	Y	MG_16	PRJNA224116	SAMN02415615	F	na	Streptococcus sanguinis	Mitis	Streptococcus sanguinis SK150	SK150	Scaffold	2011/03/16	Baylor College of Medicine	ftp://ftp.ncbi.nlm.nih.gov/genomes/all/GCF/000/192/245/GCF_000192245.1_ASM19224v1
GCF_000192275.1	Y	MG_16	PRJNA224116	SAMN00253316	F	na	Streptococcus sanguinis	Mitis	Streptococcus sanguinis SK160	SK160	Scaffold	2011/03/16	Baylor College of Medicine	ftp://ftp.ncbi.nlm.nih.gov/genomes/all/GCF/000/192/275/GCF_000192275.1_ASM19227v1
GCF_000195025.1	Y	MG_16	PRJNA224116	SAMN00253320	F	na	Streptococcus sanguinis	Mitis	Streptococcus sanguinis SK330	SK330	Scaffold	2011/04/06	Baylor College of Medicine	ftp://ftp.ncbi.nlm.nih.gov/genomes/all/GCF/000/195/025/GCF_000195025.1_ASM19502v1
GCF_000220275.1	Y	MG_16	PRJNA224116	SAMN00253970	F	na	Streptococcus sanguinis	Mitis	Streptococcus sanguinis SK340	SK340	Scaffold	2011/07/08	Baylor College of Medicine	ftp://ftp.ncbi.nlm.nih.gov/genomes/all/GCF/000/220/275/GCF_000220275.1_ASM22027v1
GCF_000191085.1	Y	MG_16	PRJNA224116	SAMN00253310	F	na	Streptococcus sanguinis	Mitis	Streptococcus sanguinis SK353	SK353	Scaffold	2011/03/04	Baylor College of Medicine	ftp://ftp.ncbi.nlm.nih.gov/genomes/all/GCF/000/191/085/GCF_000191085.1_ASM19108v1
GCF_000014205.1	Y	MG_16	PRJNA224116	SAMN02604299	F	reference genome	Streptococcus sanguinis	Mitis	Streptococcus sanguinis SK36	SK36	Complete	2007/02/09	Virginia Commonwealth University	ftp://ftp.ncbi.nlm.nih.gov/genomes/all/GCF/000/014/205/GCF_000014205.1_ASM1420v1
GCF_000191105.1	Y	MG_16	PRJNA224116	SAMN00253311	F	na	Streptococcus sanguinis	Mitis	Streptococcus sanguinis SK405	SK405	Scaffold	2011/03/04	Baylor College of Medicine	ftp://ftp.ncbi.nlm.nih.gov/genomes/all/GCF/000/191/105/GCF_000191105.1_ASM19110v1
GCF_000195045.1	Y	MG_16	PRJNA224116	SAMN00253319	F	na	Streptococcus sanguinis	Mitis	Streptococcus sanguinis SK408	SK408	Scaffold	2011/04/06	Baylor College of Medicine	ftp://ftp.ncbi.nlm.nih.gov/genomes/all/GCF/000/195/045/GCF_000195045.1_ASM19504v1
GCF_000191125.1	Y	MG_16	PRJNA224116	SAMN00253312	F	na	Streptococcus sanguinis	Mitis	Streptococcus sanguinis SK678	SK678	Scaffold	2011/03/04	Baylor College of Medicine	ftp://ftp.ncbi.nlm.nih.gov/genomes/all/GCF/000/191/125/GCF_000191125.1_ASM19112v1
GCF_000192185.1	Y	MG_16	PRJNA224116	SAMN00253313	F	na	Streptococcus sanguinis	Mitis	Streptococcus sanguinis SK72	SK72	Scaffold	2011/03/16	Baylor College of Medicine	ftp://ftp.ncbi.nlm.nih.gov/genomes/all/GCF/000/192/185/GCF_000192185.1_ASM19218v1
GCF_000188275.1	Y	MG_16	PRJNA224116	SAMN00253296	F	na	Streptococcus sanguinis	Mitis	Streptococcus sanguinis VMC66	VMC66	Scaffold	2011/02/10	Baylor College of Medicine	ftp://ftp.ncbi.nlm.nih.gov/genomes/all/GCF/000/188/275/GCF_000188275.1_ASM18827v1
GCF_000286495.1	Y	MG_16	PRJNA224116	SAMN00828791	F	na	Streptococcus sp.	Mitis	Streptococcus sp. AS14	AS14	Contig	2012/08/10	J. Craig Venter Institute	ftp://ftp.ncbi.nlm.nih.gov/genomes/all/GCF/000/286/495/GCF_000286495.1_SspAS14v1.0
GCF_001578705.1	Y	MG_160	PRJNA224116	SAMN04324324	Y	na	Streptococcus oralis subsp. dentisani	Mitis	Streptococcus oralis	DD05	Scaffold	2016/03/02	University of Kaiserslautern	ftp://ftp.ncbi.nlm.nih.gov/genomes/all/GCF/001/578/705/GCF_001578705.1_ASM157870v1
GCF_003943385.1	Y	MG_160	PRJNA224116	SAMN09631695	F	na	Streptococcus oralis subsp. dentisani	Mitis	Streptococcus oralis	BCC26	Contig	2018/12/12	Clemson University	ftp://ftp.ncbi.nlm.nih.gov/genomes/all/GCF/003/943/385/GCF_003943385.1_ASM394338v1
GCF_002093575.1	Y	MG_161	PRJNA224116	SAMN04283924	F	na	Streptococcus oralis subsp. tigurinus	Mitis	Streptococcus oralis subsp. tigurinus	859	Contig	2017/04/14	Genomic Research Laboratory (GRL)	ftp://ftp.ncbi.nlm.nih.gov/genomes/all/GCF/002/093/575/GCF_002093575.1_ASM209357v1
GCF_003943415.1	Y	MG_162	PRJNA224116	SAMN09631693	F	na	Streptococcus oralis subsp. dentisani	Mitis	Streptococcus oralis	BCC10	Contig	2018/12/12	Clemson University	ftp://ftp.ncbi.nlm.nih.gov/genomes/all/GCF/003/943/415/GCF_003943415.1_ASM394341v1
GCF_005844455.1	Y	MG_163	PRJNA224116	SAMN10863253	F	na	Streptococcus mitis	Mitis	Streptococcus mitis	1001175st1_H6	Scaffold	2019/05/26	Icahn School of Medicine at Mount Sinai	ftp://ftp.ncbi.nlm.nih.gov/genomes/all/GCF/005/844/455/GCF_005844455.1_ASM584445v1
GCF_002096855.1	Y	MG_164	PRJNA224116	SAMN06705601	F	na	Streptococcus mitis	Mitis	Streptococcus mitis	RH_17439_08	Scaffold	2017/04/18	Slagelse Hospital	ftp://ftp.ncbi.nlm.nih.gov/genomes/all/GCF/002/096/855/GCF_002096855.1_ASM209685v1
GCF_002096915.1	Y	MG_164	PRJNA224116	SAMN06705597	F	na	Streptococcus mitis	Mitis	Streptococcus mitis	OD_310347_11	Scaffold	2017/04/18	Slagelse Hospital	ftp://ftp.ncbi.nlm.nih.gov/genomes/all/GCF/002/096/915/GCF_002096915.1_ASM209691v1
GCF_001650315.1	Y	MG_165	PRJNA224116	SAMN04575401	F	na	Streptococcus sp.	Mitis	Streptococcus sp. CCUG 49591	CCUG 49591	Scaffold	2016/05/24	TAILORED-Treatment project	ftp://ftp.ncbi.nlm.nih.gov/genomes/all/GCF/001/650/315/GCF_001650315.1_ASM165031v1
GCF_001347015.1	Y	MG_166	PRJNA224116	SAMEA1029140	F	na	Streptococcus pneumoniae	Mitis	Streptococcus pneumoniae	19F	Scaffold	2015/04/01	SC	ftp://ftp.ncbi.nlm.nih.gov/genomes/all/GCF/001/347/015/GCF_001347015.1_6938_6_7
GCF_003686955.1	Y	MG_167	PRJNA224116	SAMN09762592	F	na	Streptococcus sp.	-	Streptococcus sp. 28462	28462	Contig	2018/10/24	University of Edinburgh	ftp://ftp.ncbi.nlm.nih.gov/genomes/all/GCF/003/686/955/GCF_003686955.1_ASM368695v1
GCF_001075875.1	Y	MG_168	PRJNA224116	SAMN03198108	F	na	Streptococcus infantis	Mitis	Streptococcus oralis	900_SORA	Contig	2015/07/10	University of Washington	ftp://ftp.ncbi.nlm.nih.gov/genomes/all/GCF/001/075/875/GCF_001075875.1_ASM107587v1
GCF_004332135.1	Y	MG_169	PRJNA224116	SAMN10024114	F	na	Streptococcus sp.	-	Streptococcus sp. X16XC17	X16XC17	Contig	2019/03/07	Jinan University	ftp://ftp.ncbi.nlm.nih.gov/genomes/all/GCF/004/332/135/GCF_004332135.1_ASM433213v1
GCF_000959945.1	Y	MG_17	PRJNA224116	SAMN03334896	F	na	Streptococcus oralis subsp. oralis	Mitis	Streptococcus oralis subsp. oralis	COL85/1862	Contig	2015/03/23	University at Buffalo	ftp://ftp.ncbi.nlm.nih.gov/genomes/all/GCF/000/959/945/GCF_000959945.1_ASM95994v1
GCF_001588645.1	Y	MG_170	PRJNA224116	SAMN03480681	F	na	Streptococcus oralis	Mitis	Streptococcus oralis	JPIIBV3	Contig	2016/03/11	University of Malaya	ftp://ftp.ncbi.nlm.nih.gov/genomes/all/GCF/001/588/645/GCF_001588645.1_ASM158864v1
GCF_004570575.1	Y	MG_171	PRJNA224116	SAMN11126842	F	na	Streptococcus cuniculi	-	Streptococcus cuniculi	WM131	Contig	2019/04/02	King's College London	ftp://ftp.ncbi.nlm.nih.gov/genomes/all/GCF/004/570/575/GCF_004570575.1_ASM457057v1
GCF_003942865.1	Y	MG_172	PRJNA224116	SAMN09631737	F	na	Streptococcus mitis	Mitis	Streptococcus mitis	BCC55	Contig	2018/12/12	Clemson University	ftp://ftp.ncbi.nlm.nih.gov/genomes/all/GCF/003/942/865/GCF_003942865.1_ASM394286v1
GCF_000380025.1	Y	MG_173	PRJNA224116	SAMN02256412	F	representative genome	Streptococcus entericus	-	Streptococcus entericus DSM 14446	DSM 14446	Scaffold	2013/04/23	DOE Joint Genome Institute	ftp://ftp.ncbi.nlm.nih.gov/genomes/all/GCF/000/380/025/GCF_000380025.1_ASM38002v1
GCF_001578805.1	Y	MG_174	PRJNA224116	SAMN04324329	Y	na	Streptococcus sp.	-	Streptococcus sp. DD10	DD10	Scaffold	2016/03/02	University of Kaiserslautern	ftp://ftp.ncbi.nlm.nih.gov/genomes/all/GCF/001/578/805/GCF_001578805.1_ASM157880v1
GCF_001810785.1	Y	MG_175	PRJNA224116	SAMN04477582	F	na	Streptococcus sp.	Mitis	Streptococcus sp. HMSC073F11	HMSC073F11	Scaffold	2016/10/21	The Genome Institute at Washington University	ftp://ftp.ncbi.nlm.nih.gov/genomes/all/GCF/001/810/785/GCF_001810785.1_ASM181078v1
GCF_900104285.1	Y	MG_176	PRJNA224116	SAMN05216494	F	na	Streptococcus sp.	Mitis	Streptococcus sp. NLAE-zl-C503	NLAE-zl-C503	Scaffold	2016/10/21	DOE - JOINT GENOME INSTITUTE	ftp://ftp.ncbi.nlm.nih.gov/genomes/all/GCF/900/104/285/GCF_900104285.1_IMG-taxon_2654588205_annotated_assembly
GCF_000767835.1	Y	MG_177	PRJNA224116	SAMN02848449	F	na	Streptococcus sinensis	Mitis	Streptococcus sinensis	HKU4	Contig	2014/10/22	The University of Hong Kong	ftp://ftp.ncbi.nlm.nih.gov/genomes/all/GCF/000/767/835/GCF_000767835.1_ASM76783v1
GCF_001578725.1	Y	MG_177	PRJNA224116	SAMN04324323	Y	na	Streptococcus sp.	Mitis	Streptococcus sp. DD04	DD04	Scaffold	2016/03/02	University of Kaiserslautern	ftp://ftp.ncbi.nlm.nih.gov/genomes/all/GCF/001/578/725/GCF_001578725.1_ASM157872v1
GCF_000259505.1	Y	MG_178	PRJNA224116	SAMN00761857	F	na	Streptococcus sp.	Mitis	Streptococcus sp. SK643	SK643	Contig	2012/04/23	J. Craig Venter Institute	ftp://ftp.ncbi.nlm.nih.gov/genomes/all/GCF/000/259/505/GCF_000259505.1_SspSK643v1.0
GCF_003943905.1	Y	MG_179	PRJNA224116	SAMN09631746	F	na	Streptococcus oralis subsp. dentisani	Mitis	Streptococcus mitis	BCA11	Contig	2018/12/12	Clemson University	ftp://ftp.ncbi.nlm.nih.gov/genomes/all/GCF/003/943/905/GCF_003943905.1_ASM394390v1
GCF_000722845.1	Y	MG_18	PRJNA224116	SAMN02836943	F	na	Streptococcus oralis subsp. oralis	Mitis	Streptococcus oralis	SK143	Contig	2014/07/07	Aarhus University	ftp://ftp.ncbi.nlm.nih.gov/genomes/all/GCF/000/722/845/GCF_000722845.1_ASM72284v1
GCF_001069675.1	Y	MG_18	PRJNA224116	SAMN03197291	F	na	Streptococcus oralis subsp. oralis	Mitis	Streptococcus oralis	1314_SORA	Contig	2015/07/10	University of Washington	ftp://ftp.ncbi.nlm.nih.gov/genomes/all/GCF/001/069/675/GCF_001069675.1_ASM106967v1
GCF_001070335.1	Y	MG_18	PRJNA224116	SAMN03197175	F	na	Streptococcus oralis subsp. oralis	Mitis	Streptococcus oralis	1212_SMIT	Contig	2015/07/10	University of Washington	ftp://ftp.ncbi.nlm.nih.gov/genomes/all/GCF/001/070/335/GCF_001070335.1_ASM107033v1
GCF_001071755.1	Y	MG_18	PRJNA224116	SAMN03197399	F	na	Streptococcus oralis subsp. oralis	Mitis	Streptococcus oralis	206_SPSE	Contig	2015/07/10	University of Washington	ftp://ftp.ncbi.nlm.nih.gov/genomes/all/GCF/001/071/755/GCF_001071755.1_ASM107175v1
GCF_001072035.1	Y	MG_18	PRJNA224116	SAMN03197467	F	na	Streptococcus oralis subsp. oralis	Mitis	Streptococcus oralis	274_SPSE	Contig	2015/07/10	University of Washington	ftp://ftp.ncbi.nlm.nih.gov/genomes/all/GCF/001/072/035/GCF_001072035.1_ASM107203v1
GCF_001074055.1	Y	MG_18	PRJNA224116	SAMN03197932	F	na	Streptococcus oralis subsp. oralis	Mitis	Streptococcus oralis	727_SORA	Contig	2015/07/10	University of Washington	ftp://ftp.ncbi.nlm.nih.gov/genomes/all/GCF/001/074/055/GCF_001074055.1_ASM107405v1
GCF_001074085.1	Y	MG_18	PRJNA224116	SAMN03197939	F	na	Streptococcus oralis subsp. oralis	Mitis	Streptococcus oralis	734_SORA	Contig	2015/07/10	University of Washington	ftp://ftp.ncbi.nlm.nih.gov/genomes/all/GCF/001/074/085/GCF_001074085.1_ASM107408v1
GCF_001075675.1	Y	MG_18	PRJNA224116	SAMN03198130	F	na	Streptococcus oralis subsp. oralis	Mitis	Streptococcus oralis	918_SORA	Contig	2015/07/10	University of Washington	ftp://ftp.ncbi.nlm.nih.gov/genomes/all/GCF/001/075/675/GCF_001075675.1_ASM107567v1
GCF_001639355.1	Y	MG_18	PRJNA224116	SAMN04623586	F	na	Streptococcus oralis	Mitis	Streptococcus oralis	CCUG 35754	Scaffold	2016/04/29	TAILORED-Treatment project	ftp://ftp.ncbi.nlm.nih.gov/genomes/all/GCF/001/639/355/GCF_001639355.1_ASM163935v1
GCF_001639395.1	Y	MG_18	PRJNA224116	SAMN04625404	F	na	Streptococcus oralis	Mitis	Streptococcus oralis	CCUG 62648	Scaffold	2016/04/29	TAILORED-Treatment project	ftp://ftp.ncbi.nlm.nih.gov/genomes/all/GCF/001/639/395/GCF_001639395.1_ASM163939v1
GCF_002386345.1	Y	MG_18	PRJNA224116	SAMN07312411	F	na	Streptococcus oralis	Mitis	Streptococcus oralis	FDAARGOS_367	Complete	2017/09/28	University of Maryland School of Medicine Institute for Genome Sciences (IGS) - sequencing center	ftp://ftp.ncbi.nlm.nih.gov/genomes/all/GCF/002/386/345/GCF_002386345.1_ASM238634v1
GCF_003942285.1	Y	MG_18	PRJNA224116	SAMN09631786	F	na	Streptococcus oralis	Mitis	Streptococcus oralis	BCA18	Contig	2018/12/12	Clemson University	ftp://ftp.ncbi.nlm.nih.gov/genomes/all/GCF/003/942/285/GCF_003942285.1_ASM394228v1
GCF_003942565.1	Y	MG_18	PRJNA224116	SAMN09631756	F	na	Streptococcus oralis	Mitis	Streptococcus oralis	BCA21	Contig	2018/12/12	Clemson University	ftp://ftp.ncbi.nlm.nih.gov/genomes/all/GCF/003/942/565/GCF_003942565.1_ASM394256v1
GCF_003942635.1	Y	MG_18	PRJNA224116	SAMN09631752	F	na	Streptococcus oralis	Mitis	Streptococcus oralis	BCC50	Contig	2018/12/12	Clemson University	ftp://ftp.ncbi.nlm.nih.gov/genomes/all/GCF/003/942/635/GCF_003942635.1_ASM394263v1
GCF_003942675.1	Y	MG_18	PRJNA224116	SAMN09631751	F	na	Streptococcus oralis	Mitis	Streptococcus oralis	BCC38	Contig	2018/12/12	Clemson University	ftp://ftp.ncbi.nlm.nih.gov/genomes/all/GCF/003/942/675/GCF_003942675.1_ASM394267v1
GCF_003942785.1	Y	MG_18	PRJNA224116	SAMN09631742	F	na	Streptococcus oralis	Mitis	Streptococcus oralis	KLC05	Contig	2018/12/12	Clemson University	ftp://ftp.ncbi.nlm.nih.gov/genomes/all/GCF/003/942/785/GCF_003942785.1_ASM394278v1
GCF_003942805.1	Y	MG_18	PRJNA224116	SAMN09631738	F	na	Streptococcus oralis	Mitis	Streptococcus oralis	BCC58	Contig	2018/12/12	Clemson University	ftp://ftp.ncbi.nlm.nih.gov/genomes/all/GCF/003/942/805/GCF_003942805.1_ASM394280v1
GCF_003942875.1	Y	MG_18	PRJNA224116	SAMN09631736	F	na	Streptococcus oralis	Mitis	Streptococcus oralis	BCC52	Contig	2018/12/12	Clemson University	ftp://ftp.ncbi.nlm.nih.gov/genomes/all/GCF/003/942/875/GCF_003942875.1_ASM394287v1
GCF_003942985.1	Y	MG_18	PRJNA224116	SAMN09631727	F	na	Streptococcus oralis	Mitis	Streptococcus oralis	BCC02	Contig	2018/12/12	Clemson University	ftp://ftp.ncbi.nlm.nih.gov/genomes/all/GCF/003/942/985/GCF_003942985.1_ASM394298v1
GCF_003943805.1	Y	MG_18	PRJNA224116	SAMN09631760	F	na	Streptococcus oralis	Mitis	Streptococcus oralis	BCC35	Contig	2018/12/12	Clemson University	ftp://ftp.ncbi.nlm.nih.gov/genomes/all/GCF/003/943/805/GCF_003943805.1_ASM394380v1
GCF_003943825.1	Y	MG_18	PRJNA224116	SAMN09631755	F	na	Streptococcus oralis	Mitis	Streptococcus oralis	BCC63	Contig	2018/12/12	Clemson University	ftp://ftp.ncbi.nlm.nih.gov/genomes/all/GCF/003/943/825/GCF_003943825.1_ASM394382v1
GCF_003943835.1	Y	MG_18	PRJNA224116	SAMN09631750	F	na	Streptococcus oralis	Mitis	Streptococcus oralis	BCC19	Contig	2018/12/12	Clemson University	ftp://ftp.ncbi.nlm.nih.gov/genomes/all/GCF/003/943/835/GCF_003943835.1_ASM394383v1
GCF_003943875.1	Y	MG_18	PRJNA224116	SAMN09631749	F	na	Streptococcus oralis	Mitis	Streptococcus oralis	BCC11	Contig	2018/12/12	Clemson University	ftp://ftp.ncbi.nlm.nih.gov/genomes/all/GCF/003/943/875/GCF_003943875.1_ASM394387v1
GCF_003944395.1	Y	MG_18	PRJNA224116	SAMN09631785	F	na	Streptococcus oralis	Mitis	Streptococcus oralis	BCA17	Contig	2018/12/12	Clemson University	ftp://ftp.ncbi.nlm.nih.gov/genomes/all/GCF/003/944/395/GCF_003944395.1_ASM394439v1
GCF_900637025.1	Y	MG_18	PRJNA224116	SAMEA3936797	F	na	Streptococcus oralis	Mitis	Streptococcus oralis ATCC 35037	NCTC11427	Complete	2018/12/20	SC	ftp://ftp.ncbi.nlm.nih.gov/genomes/all/GCF/900/637/025/GCF_900637025.1_46338_H01
GCF_000185265.1	Y	MG_18	PRJNA224116	SAMN00260261	F	na	Streptococcus oralis subsp. oralis	Mitis	Streptococcus oralis ATCC 49296	ATCC 49296	Scaffold	2011/01/12	Baylor College of Medicine	ftp://ftp.ncbi.nlm.nih.gov/genomes/all/GCF/000/185/265/GCF_000185265.1_ASM18526v1
GCF_000257455.1	Y	MG_18	PRJNA224116	SAMN00761855	F	na	Streptococcus oralis subsp. oralis	Mitis	Streptococcus oralis SK610	SK610	Contig	2012/04/02	J. Craig Venter Institute	ftp://ftp.ncbi.nlm.nih.gov/genomes/all/GCF/000/257/455/GCF_000257455.1_SoralisSK610v1.0
GCF_002860885.1	Y	MG_18	PRJNA224116	SAMN08193727	F	na	Streptococcus oralis	Mitis	Streptococcus oralis subsp. dentisani	UMB0008	Contig	2017/12/28	Loyola University Chicago	ftp://ftp.ncbi.nlm.nih.gov/genomes/all/GCF/002/860/885/GCF_002860885.1_ASM286088v1
GCF_000960035.1	Y	MG_18	PRJNA224116	SAMN03334901	F	na	Streptococcus oralis subsp. oralis	Mitis	Streptococcus oralis subsp. oralis	SK141	Contig	2015/03/23	University at Buffalo	ftp://ftp.ncbi.nlm.nih.gov/genomes/all/GCF/000/960/035/GCF_000960035.1_ASM96003v1
GCF_002096175.1	Y	MG_18	PRJNA224116	SAMN06705613	F	na	Streptococcus oralis	Mitis	Streptococcus oralis subsp. oralis	OD_338919_11	Scaffold	2017/04/18	Slagelse Hospital	ftp://ftp.ncbi.nlm.nih.gov/genomes/all/GCF/002/096/175/GCF_002096175.1_ASM209617v1
GCF_002096205.1	Y	MG_18	PRJNA224116	SAMN06705614	F	na	Streptococcus oralis	Mitis	Streptococcus oralis subsp. oralis	RH_5486_10	Scaffold	2017/04/18	Slagelse Hospital	ftp://ftp.ncbi.nlm.nih.gov/genomes/all/GCF/002/096/205/GCF_002096205.1_ASM209620v1
GCF_002096375.1	Y	MG_18	PRJNA224116	SAMN06705625	F	na	Streptococcus oralis	Mitis	Streptococcus oralis subsp. oralis	RH_8610_08	Contig	2017/04/18	Slagelse Hospital	ftp://ftp.ncbi.nlm.nih.gov/genomes/all/GCF/002/096/375/GCF_002096375.1_ASM209637v1
GCF_002096435.1	Y	MG_18	PRJNA224116	SAMN06705626	F	na	Streptococcus oralis	Mitis	Streptococcus oralis subsp. oralis	Y_11577_11	Scaffold	2017/04/18	Slagelse Hospital	ftp://ftp.ncbi.nlm.nih.gov/genomes/all/GCF/002/096/435/GCF_002096435.1_ASM209643v1
GCF_002096455.1	Y	MG_18	PRJNA224116	SAMN06705623	F	na	Streptococcus oralis	Mitis	Streptococcus oralis subsp. oralis	RH_50443_09	Scaffold	2017/04/18	Slagelse Hospital	ftp://ftp.ncbi.nlm.nih.gov/genomes/all/GCF/002/096/455/GCF_002096455.1_ASM209645v1
GCF_002096495.1	Y	MG_18	PRJNA224116	SAMN06705620	F	na	Streptococcus oralis	Mitis	Streptococcus oralis subsp. oralis	OD_336064_07	Contig	2017/04/18	Slagelse Hospital	ftp://ftp.ncbi.nlm.nih.gov/genomes/all/GCF/002/096/495/GCF_002096495.1_ASM209649v1
GCF_002096515.1	Y	MG_18	PRJNA224116	SAMN06705619	F	na	Streptococcus oralis	Mitis	Streptococcus oralis subsp. oralis	OD_332610_07	Contig	2017/04/18	Slagelse Hospital	ftp://ftp.ncbi.nlm.nih.gov/genomes/all/GCF/002/096/515/GCF_002096515.1_ASM209651v1
GCF_002096525.1	Y	MG_18	PRJNA224116	SAMN06705622	F	na	Streptococcus oralis	Mitis	Streptococcus oralis subsp. oralis	RH_34706_11	Contig	2017/04/18	Slagelse Hospital	ftp://ftp.ncbi.nlm.nih.gov/genomes/all/GCF/002/096/525/GCF_002096525.1_ASM209652v1
GCF_002096535.1	Y	MG_18	PRJNA224116	SAMN06705621	F	na	Streptococcus oralis	Mitis	Streptococcus oralis subsp. oralis	RH_1735_08	Contig	2017/04/18	Slagelse Hospital	ftp://ftp.ncbi.nlm.nih.gov/genomes/all/GCF/002/096/535/GCF_002096535.1_ASM209653v1
GCF_002096575.1	Y	MG_18	PRJNA224116	SAMN06705618	F	na	Streptococcus oralis	Mitis	Streptococcus oralis subsp. oralis	OD_321121_09	Contig	2017/04/18	Slagelse Hospital	ftp://ftp.ncbi.nlm.nih.gov/genomes/all/GCF/002/096/575/GCF_002096575.1_ASM209657v1
GCF_002096595.1	Y	MG_18	PRJNA224116	SAMN06705617	F	na	Streptococcus oralis	Mitis	Streptococcus oralis subsp. oralis	OD_311844-09	Scaffold	2017/04/18	Slagelse Hospital	ftp://ftp.ncbi.nlm.nih.gov/genomes/all/GCF/002/096/595/GCF_002096595.1_ASM209659v1
GCF_002096605.1	Y	MG_18	PRJNA224116	SAMN06705616	F	na	Streptococcus oralis	Mitis	Streptococcus oralis subsp. oralis	B_19836_11	Contig	2017/04/18	Slagelse Hospital	ftp://ftp.ncbi.nlm.nih.gov/genomes/all/GCF/002/096/605/GCF_002096605.1_ASM209660v1
GCF_000253155.1	Y	MG_18	PRJNA224116	SAMEA2272261	F	na	Streptococcus oralis subsp. oralis	Mitis	Streptococcus oralis Uo5	Uo5	Complete	2011/03/23	Nano+Bio Center, University of Kaiserslautern	ftp://ftp.ncbi.nlm.nih.gov/genomes/all/GCF/000/253/155/GCF_000253155.1_ASM25315v1
GCF_001068925.1	Y	MG_18	PRJNA224116	SAMN03197227	F	na	Streptococcus oralis subsp. oralis	Mitis	Streptococcus pseudopneumoniae	126_SPSE	Scaffold	2015/07/10	University of Washington	ftp://ftp.ncbi.nlm.nih.gov/genomes/all/GCF/001/068/925/GCF_001068925.1_ASM106892v1
GCF_003944385.1	Y	MG_18	PRJNA224116	SAMN09631787	F	na	Streptococcus sp.	Mitis	Streptococcus sp. BCA20	BCA20	Contig	2018/12/12	Clemson University	ftp://ftp.ncbi.nlm.nih.gov/genomes/all/GCF/003/944/385/GCF_003944385.1_ASM394438v1
GCF_000187645.1	Y	MG_18	PRJNA224116	SAMN02463754	F	na	Streptococcus oralis subsp. oralis	Mitis	Streptococcus sp. C300	C300	Scaffold	2011/02/03	Broad Institute	ftp://ftp.ncbi.nlm.nih.gov/genomes/all/GCF/000/187/645/GCF_000187645.1_ASM18764v1
GCF_002289235.2	Y	MG_18	PRJNA224116	SAMN04875582	F	na	Streptococcus sp.	Mitis	Streptococcus sp. FDAARGOS_256	FDAARGOS_256	Contig	2018/01/19	University of Maryland School of Medicine Institute for Genome Sciences (IGS) - sequencing center	ftp://ftp.ncbi.nlm.nih.gov/genomes/all/GCF/002/289/235/GCF_002289235.2_ASM228923v2
GCF_000296875.1	Y	MG_18	PRJNA224116	SAMN02470271	F	na	Streptococcus oralis subsp. oralis	Mitis	Streptococcus sp. GMD1S	GMD1S	Contig	2012/09/14	Los Alamos National Laboratory	ftp://ftp.ncbi.nlm.nih.gov/genomes/all/GCF/000/296/875/GCF_000296875.1_ASM29687v1
GCF_000296995.1	Y	MG_18	PRJNA224116	SAMN02470273	F	na	Streptococcus oralis subsp. oralis	Mitis	Streptococcus sp. GMD2S	GMD2S	Contig	2012/09/14	Los Alamos National Laboratory	ftp://ftp.ncbi.nlm.nih.gov/genomes/all/GCF/000/296/995/GCF_000296995.1_ASM29699v1
GCF_000298695.2	Y	MG_18	PRJNA224116	SAMN02470258	F	na	Streptococcus oralis subsp. oralis	Mitis	Streptococcus sp. GMD3S	GMD3S	Contig	2013/02/23	Los Alamos National Laboratory	ftp://ftp.ncbi.nlm.nih.gov/genomes/all/GCF/000/298/695/GCF_000298695.2_ASM29869v2
GCF_000296955.1	Y	MG_18	PRJNA224116	SAMN02470259	F	na	Streptococcus oralis subsp. oralis	Mitis	Streptococcus sp. GMD4S	GMD4S	Contig	2012/09/14	Los Alamos National Laboratory	ftp://ftp.ncbi.nlm.nih.gov/genomes/all/GCF/000/296/955/GCF_000296955.1_ASM29695v1
GCF_000298715.2	Y	MG_18	PRJNA224116	SAMN02470267	F	na	Streptococcus oralis subsp. oralis	Mitis	Streptococcus sp. GMD5S	GMD5S	Contig	2013/01/08	Los Alamos National Laboratory	ftp://ftp.ncbi.nlm.nih.gov/genomes/all/GCF/000/298/715/GCF_000298715.2_ASM29871v2
GCF_000297015.1	Y	MG_18	PRJNA224116	SAMN02470280	F	na	Streptococcus oralis subsp. oralis	Mitis	Streptococcus sp. GMD6S	GMD6S	Contig	2012/09/14	Los Alamos National Laboratory	ftp://ftp.ncbi.nlm.nih.gov/genomes/all/GCF/000/297/015/GCF_000297015.1_ASM29701v1
GCF_001813005.1	Y	MG_18	PRJNA224116	SAMN04480052	F	na	Streptococcus sp.	Mitis	Streptococcus sp. HMSC062H02	HMSC062H02	Scaffold	2016/10/21	The Genome Institute at Washington University	ftp://ftp.ncbi.nlm.nih.gov/genomes/all/GCF/001/813/005/GCF_001813005.1_ASM181300v1
GCF_001837335.1	Y	MG_18	PRJNA224116	SAMN04498629	F	na	Streptococcus sp.	Mitis	Streptococcus sp. HMSC066F01	HMSC066F01	Scaffold	2016/10/25	The Genome Institute at Washington University	ftp://ftp.ncbi.nlm.nih.gov/genomes/all/GCF/001/837/335/GCF_001837335.1_ASM183733v1
GCF_001815805.1	Y	MG_18	PRJNA224116	SAMN04480466	F	na	Streptococcus sp.	Mitis	Streptococcus sp. HMSC072D05	HMSC072D05	Scaffold	2016/10/21	The Genome Institute at Washington University	ftp://ftp.ncbi.nlm.nih.gov/genomes/all/GCF/001/815/805/GCF_001815805.1_ASM181580v1
GCF_001814835.1	Y	MG_18	PRJNA224116	SAMN04480412	F	na	Streptococcus sp.	Mitis	Streptococcus sp. HMSC072D07	HMSC072D07	Scaffold	2016/10/21	The Genome Institute at Washington University	ftp://ftp.ncbi.nlm.nih.gov/genomes/all/GCF/001/814/835/GCF_001814835.1_ASM181483v1
GCF_001810825.1	Y	MG_18	PRJNA224116	SAMN04477605	F	na	Streptococcus sp.	Mitis	Streptococcus sp. HMSC076C08	HMSC076C08	Scaffold	2016/10/21	The Genome Institute at Washington University	ftp://ftp.ncbi.nlm.nih.gov/genomes/all/GCF/001/810/825/GCF_001810825.1_ASM181082v1
GCF_001812375.1	Y	MG_18	PRJNA224116	SAMN04477662	F	na	Streptococcus sp.	Mitis	Streptococcus sp. HMSC077F03	HMSC077F03	Scaffold	2016/10/21	The Genome Institute at Washington University	ftp://ftp.ncbi.nlm.nih.gov/genomes/all/GCF/001/812/375/GCF_001812375.1_ASM181237v1
GCF_001683375.1	Y	MG_18	PRJNA224116	SAMN03897726	F	na	Streptococcus sp.	Mitis	Streptococcus sp. oral taxon 064	W10853	Chromosome	2016/07/11	The Forsyth Institute	ftp://ftp.ncbi.nlm.nih.gov/genomes/all/GCF/001/683/375/GCF_001683375.1_ASM168337v1
GCF_000187465.1	Y	MG_180	PRJNA224116	SAMN00216972	F	na	Streptococcus infantis	Mitis	Streptococcus infantis ATCC 700779	ATCC 700779	Scaffold	2011/02/03	Baylor College of Medicine	ftp://ftp.ncbi.nlm.nih.gov/genomes/all/GCF/000/187/465/GCF_000187465.1_ASM18746v1
GCF_001578875.1	Y	MG_181	PRJNA224116	SAMN04325020	Y	na	Streptococcus sp.	-	Streptococcus sp. DD13	DD13	Scaffold	2016/03/02	University of Kaiserslautern	ftp://ftp.ncbi.nlm.nih.gov/genomes/all/GCF/001/578/875/GCF_001578875.1_ASM157887v1
GCF_001578775.1	Y	MG_182	PRJNA224116	SAMN04324327	Y	na	Streptococcus cristatus	Mitis	Streptococcus cristatus	DD08	Scaffold	2016/03/02	University of Kaiserslautern	ftp://ftp.ncbi.nlm.nih.gov/genomes/all/GCF/001/578/775/GCF_001578775.1_ASM157877v1
GCF_004570525.1	Y	MG_183	PRJNA224116	SAMN11126864	F	na	Streptococcus sp.	-	Streptococcus sp. WM07	WM07	Contig	2019/04/02	King's College London	ftp://ftp.ncbi.nlm.nih.gov/genomes/all/GCF/004/570/525/GCF_004570525.1_ASM457052v1
GCF_001074825.1	Y	MG_184	PRJNA224116	SAMN03198094	F	na	Streptococcus mitis	Mitis	Streptococcus pseudopneumoniae	888_SPSE	Contig	2015/07/10	University of Washington	ftp://ftp.ncbi.nlm.nih.gov/genomes/all/GCF/001/074/825/GCF_001074825.1_ASM107482v1
GCF_000423765.1	Y	MG_185	PRJNA224116	SAMN02440826	F	representative genome	Streptococcus porci	-	Streptococcus porci DSM 23759	DSM 23759	Scaffold	2013/07/11	DOE Joint Genome Institute	ftp://ftp.ncbi.nlm.nih.gov/genomes/all/GCF/000/423/765/GCF_000423765.1_ASM42376v1
GCF_001578945.1	Y	MG_186	PRJNA224116	SAMN04325028	Y	na	Streptococcus oralis subsp. dentisani	Mitis	Streptococcus oralis	DD16	Scaffold	2016/03/02	University of Kaiserslautern	ftp://ftp.ncbi.nlm.nih.gov/genomes/all/GCF/001/578/945/GCF_001578945.1_ASM157894v1
GCF_003860045.1	Y	MG_187	PRJNA224116	SAMN10478697	F	na	Streptococcus minor	-	Streptococcus minor	OH4621_COT-116	Contig	2018/12/03	UC Davis	ftp://ftp.ncbi.nlm.nih.gov/genomes/all/GCF/003/860/045/GCF_003860045.1_ASM386004v1
GCF_000377005.1	Y	MG_187	PRJNA224116	SAMN02441724	F	representative genome	Streptococcus minor	-	Streptococcus minor DSM 17118	DSM 17118	Contig	2013/04/22	DOE Joint Genome Institute	ftp://ftp.ncbi.nlm.nih.gov/genomes/all/GCF/000/377/005/GCF_000377005.1_ASM37700v1
GCF_001984715.1	Y	MG_188	PRJNA224116	SAMN06174760	F	na	Streptococcus azizii	-	Streptococcus azizii	12-5202	Contig	2017/02/04	Centers for Disease Control and Prevention	ftp://ftp.ncbi.nlm.nih.gov/genomes/all/GCF/001/984/715/GCF_001984715.1_ASM198471v1
GCF_001069865.1	Y	MG_189	PRJNA224116	SAMN03197334	F	na	Streptococcus mitis (distant)	Mitis	Streptococcus pseudopneumoniae	144_SPSE	Contig	2015/07/10	University of Washington	ftp://ftp.ncbi.nlm.nih.gov/genomes/all/GCF/001/069/865/GCF_001069865.1_ASM106986v1
GCF_003627155.1	Y	MG_19	PRJNA224116	SAMN10135937	F	na	Streptococcus sp.	Mitis	Streptococcus sp. ChDC B345	ChDC B345	Complete	2018/10/07	Korean Collection for Oral Microbiology	ftp://ftp.ncbi.nlm.nih.gov/genomes/all/GCF/003/627/155/GCF_003627155.1_ASM362715v1
GCF_001579525.1	Y	MG_190	PRJNA224116	SAMN04325052	Y	na	Streptococcus oralis	Mitis	Streptococcus oralis	DD25	Scaffold	2016/03/17	University of Kaiserslautern	ftp://ftp.ncbi.nlm.nih.gov/genomes/all/GCF/001/579/525/GCF_001579525.1_ASM157952v1
GCF_001171885.1	Y	MG_191	PRJNA224116	SAMEA1024553	F	na	Streptococcus pneumoniae	Mitis	Streptococcus pneumoniae	SMRU946	Contig	2015/07/11	SC	ftp://ftp.ncbi.nlm.nih.gov/genomes/all/GCF/001/171/885/GCF_001171885.1_6680_6_10
GCF_003428885.1	Y	MG_192	PRJNA224116	SAMN09708544	F	na	Streptococcus sp.	Mitis	Streptococcus sp. LQJ-218	LQJ-218	Contig	2018/08/27	Sichuan University	ftp://ftp.ncbi.nlm.nih.gov/genomes/all/GCF/003/428/885/GCF_003428885.1_ASM342888v1
GCF_002096445.1	Y	MG_193	PRJNA224116	SAMN06705624	F	na	Streptococcus oralis	Mitis	Streptococcus oralis subsp. oralis	RH_57980_07	Contig	2017/04/18	Slagelse Hospital	ftp://ftp.ncbi.nlm.nih.gov/genomes/all/GCF/002/096/445/GCF_002096445.1_ASM209644v1
GCF_000423745.1	Y	MG_194	PRJNA224116	SAMN02441159	F	representative genome	Streptococcus plurextorum	-	Streptococcus plurextorum DSM 22810	DSM 22810	Scaffold	2013/07/11	DOE Joint Genome Institute	ftp://ftp.ncbi.nlm.nih.gov/genomes/all/GCF/000/423/745/GCF_000423745.1_ASM42374v1
GCF_003942695.1	Y	MG_195	PRJNA224116	SAMN09631744	F	na	Streptococcus oralis subsp. dentisani	Mitis	Streptococcus mitis	KLC11	Contig	2018/12/12	Clemson University	ftp://ftp.ncbi.nlm.nih.gov/genomes/all/GCF/003/942/695/GCF_003942695.1_ASM394269v1
GCF_002093515.1	Y	MG_196	PRJNA224116	SAMN04283922	F	na	Streptococcus oralis subsp. tigurinus	Mitis	Streptococcus oralis subsp. tigurinus	AZ_14	Contig	2017/04/14	Genomic Research Laboratory (GRL)	ftp://ftp.ncbi.nlm.nih.gov/genomes/all/GCF/002/093/515/GCF_002093515.1_ASM209351v1
GCF_000148525.1	Y	MG_197	PRJNA224116	SAMN00001434	F	na	Streptococcus mitis	Mitis	Streptococcus mitis SK564	SK564	Contig	2010/09/24	University of Maryland Institute for Genome Sciences	ftp://ftp.ncbi.nlm.nih.gov/genomes/all/GCF/000/148/525/GCF_000148525.1_ASM14852v1
GCF_002887775.1	Y	MG_198	PRJNA224116	SAMN04311937	F	na	Streptococcus penaeicida	Pyogenic	Streptococcus penaeicida	CAIM 1838	Contig	2018/01/17	CIAD, A.C.	ftp://ftp.ncbi.nlm.nih.gov/genomes/all/GCF/002/887/775/GCF_002887775.1_ASM288777v1
GCF_002096735.1	Y	MG_199	PRJNA224116	SAMN06705606	F	na	Streptococcus mitis	Mitis	Streptococcus mitis	RH_8961_10	Scaffold	2017/04/18	Slagelse Hospital	ftp://ftp.ncbi.nlm.nih.gov/genomes/all/GCF/002/096/735/GCF_002096735.1_ASM209673v1
GCF_001072165.1	Y	MG_2	PRJNA224116	SAMN03197494	F	na	Streptococcus dysgalactiae	Pyogenic	Streptococcus dysgalactiae	302_SDYS	Contig	2015/07/10	University of Washington	ftp://ftp.ncbi.nlm.nih.gov/genomes/all/GCF/001/072/165/GCF_001072165.1_ASM107216v1
GCF_003967135.1	Y	MG_2	PRJNA224116	SAMD00051096	F	na	Streptococcus dysgalactiae	Pyogenic	Streptococcus dysgalactiae	Kdys0611	Complete	2018/07/08	Research Center for Bioinformatics and Biosciences, National Research Institute of Fisheries Science, Japan Fisheries Research and Education Agency	ftp://ftp.ncbi.nlm.nih.gov/genomes/all/GCF/003/967/135/GCF_003967135.1_ASM396713v1
GCF_900459065.1	Y	MG_2	PRJNA224116	SAMEA53432668	F	na	Streptococcus dysgalactiae	Pyogenic	Streptococcus dysgalactiae	NCTC13759	Contig	2018/08/01	SC	ftp://ftp.ncbi.nlm.nih.gov/genomes/all/GCF/900/459/065/GCF_900459065.1_45296_F02
GCF_900459095.1	Y	MG_2	PRJNA224116	SAMEA3879491	F	na	Streptococcus dysgalactiae	Pyogenic	Streptococcus dysgalactiae	NCTC13762	Contig	2018/08/01	SC	ftp://ftp.ncbi.nlm.nih.gov/genomes/all/GCF/900/459/095/GCF_900459095.1_44738_F02
GCF_901543725.1	Y	MG_2	PRJNA224116	SAMEA3649039	F	na	Streptococcus dysgalactiae	Pyogenic	Streptococcus dysgalactiae	NCTC6403	Complete	2019/05/17	SC	ftp://ftp.ncbi.nlm.nih.gov/genomes/all/GCF/901/543/725/GCF_901543725.1_42731_A01
GCF_900459205.1	Y	MG_2	PRJNA224116	SAMEA3729933	F	na	Streptococcus dysgalactiae subsp. dysgalactiae	Pyogenic	Streptococcus dysgalactiae subsp. dysgalactiae	NCTC4670	Contig	2018/08/01	SC	ftp://ftp.ncbi.nlm.nih.gov/genomes/all/GCF/900/459/205/GCF_900459205.1_43874_E01
GCF_900635345.1	Y	MG_2	PRJNA224116	SAMEA3539719	F	na	Streptococcus dysgalactiae subsp. dysgalactiae	Pyogenic	Streptococcus dysgalactiae subsp. dysgalactiae	NCTC4669	Complete	2018/12/19	SC	ftp://ftp.ncbi.nlm.nih.gov/genomes/all/GCF/900/635/345/GCF_900635345.1_41686_B01
GCF_000188315.1	Y	MG_2	PRJNA224116	SAMN02428924	F	na	Streptococcus dysgalactiae subsp. dysgalactiae	Pyogenic	Streptococcus dysgalactiae subsp. dysgalactiae ATCC 27957	ATCC 27957	Chromosome	2011/02/09	Cornell University	ftp://ftp.ncbi.nlm.nih.gov/genomes/all/GCF/000/188/315/GCF_000188315.1_ASM18831v1
GCF_000970985.1	Y	MG_2	PRJNA224116	SAMN03445737	F	na	Streptococcus dysgalactiae subsp. equisimilis	Pyogenic	Streptococcus dysgalactiae subsp. equisimilis	UT-5345	Contig	2015/04/08	MD Anderson	ftp://ftp.ncbi.nlm.nih.gov/genomes/all/GCF/000/970/985/GCF_000970985.1_ASM97098v1
GCF_000970995.1	Y	MG_2	PRJNA224116	SAMN03445736	F	na	Streptococcus dysgalactiae subsp. equisimilis	Pyogenic	Streptococcus dysgalactiae subsp. equisimilis	UT-5354	Contig	2015/04/08	MD Anderson	ftp://ftp.ncbi.nlm.nih.gov/genomes/all/GCF/000/970/995/GCF_000970995.1_ASM97099v1
GCF_000971005.1	Y	MG_2	PRJNA224116	SAMN03445739	F	na	Streptococcus dysgalactiae subsp. equisimilis	Pyogenic	Streptococcus dysgalactiae subsp. equisimilis	UT-SS957	Contig	2015/04/08	MD Anderson	ftp://ftp.ncbi.nlm.nih.gov/genomes/all/GCF/000/971/005/GCF_000971005.1_ASM97100v1
GCF_001038445.1	Y	MG_2	PRJNA224116	SAMN03268887	F	na	Streptococcus dysgalactiae subsp. equisimilis	Pyogenic	Streptococcus dysgalactiae subsp. equisimilis	WCHSDSE-1	Contig	2015/06/23	West China Hospital, Sichuan University	ftp://ftp.ncbi.nlm.nih.gov/genomes/all/GCF/001/038/445/GCF_001038445.1_ASM103844v1
GCF_001682735.1	Y	MG_2	PRJNA224116	SAMN05327338	F	na	Streptococcus dysgalactiae subsp. equisimilis	Pyogenic	Streptococcus dysgalactiae subsp. equisimilis	UT_4231_KK	Contig	2016/07/09	The UT MD Anderson Cancer Center	ftp://ftp.ncbi.nlm.nih.gov/genomes/all/GCF/001/682/735/GCF_001682735.1_ASM168273v1
GCF_001682745.1	Y	MG_2	PRJNA224116	SAMN05327337	F	na	Streptococcus dysgalactiae subsp. equisimilis	Pyogenic	Streptococcus dysgalactiae subsp. equisimilis	UT_4031CC	Contig	2016/07/09	The UT MD Anderson Cancer Center	ftp://ftp.ncbi.nlm.nih.gov/genomes/all/GCF/001/682/745/GCF_001682745.1_ASM168274v1
GCF_001682765.1	Y	MG_2	PRJNA224116	SAMN05327342	F	na	Streptococcus dysgalactiae subsp. equisimilis	Pyogenic	Streptococcus dysgalactiae subsp. equisimilis	UT_4277_BB	Scaffold	2016/07/09	The UT MD Anderson Cancer Center	ftp://ftp.ncbi.nlm.nih.gov/genomes/all/GCF/001/682/765/GCF_001682765.1_ASM168276v1
GCF_001682815.1	Y	MG_2	PRJNA224116	SAMN05327341	F	na	Streptococcus dysgalactiae subsp. equisimilis	Pyogenic	Streptococcus dysgalactiae subsp. equisimilis	UT_4242_AB	Scaffold	2016/07/09	The UT MD Anderson Cancer Center	ftp://ftp.ncbi.nlm.nih.gov/genomes/all/GCF/001/682/815/GCF_001682815.1_ASM168281v1
GCF_001682825.1	Y	MG_2	PRJNA224116	SAMN05327339	F	na	Streptococcus dysgalactiae subsp. equisimilis	Pyogenic	Streptococcus dysgalactiae subsp. equisimilis	UT_4234_DH	Contig	2016/07/09	The UT MD Anderson Cancer Center	ftp://ftp.ncbi.nlm.nih.gov/genomes/all/GCF/001/682/825/GCF_001682825.1_ASM168282v1
GCF_001704435.1	Y	MG_2	PRJNA224116	SAMN05327345	F	na	Streptococcus dysgalactiae subsp. equisimilis	Pyogenic	Streptococcus dysgalactiae subsp. equisimilis	ASDSE_96	Contig	2016/08/13	The UT MD Anderson Cancer Center	ftp://ftp.ncbi.nlm.nih.gov/genomes/all/GCF/001/704/435/GCF_001704435.1_ASM170443v1
GCF_001704445.1	Y	MG_2	PRJNA224116	SAMN05327346	F	na	Streptococcus dysgalactiae subsp. equisimilis	Pyogenic	Streptococcus dysgalactiae subsp. equisimilis	ASDSE_99	Contig	2016/08/13	The UT MD Anderson Cancer Center	ftp://ftp.ncbi.nlm.nih.gov/genomes/all/GCF/001/704/445/GCF_001704445.1_ASM170444v1
GCF_001704455.1	Y	MG_2	PRJNA224116	SAMN05327343	F	na	Streptococcus dysgalactiae subsp. equisimilis	Pyogenic	Streptococcus dysgalactiae subsp. equisimilis	UT_4966_RC	Contig	2016/08/13	The UT MD Anderson Cancer Center	ftp://ftp.ncbi.nlm.nih.gov/genomes/all/GCF/001/704/455/GCF_001704455.1_ASM170445v1
GCF_001704515.1	Y	MG_2	PRJNA224116	SAMN05327344	F	na	Streptococcus dysgalactiae subsp. equisimilis	Pyogenic	Streptococcus dysgalactiae subsp. equisimilis	UT_4255RC	Contig	2016/08/13	The UT MD Anderson Cancer Center	ftp://ftp.ncbi.nlm.nih.gov/genomes/all/GCF/001/704/515/GCF_001704515.1_ASM170451v1
GCF_002094215.1	Y	MG_2	PRJNA224116	SAMN06688436	F	na	Streptococcus dysgalactiae subsp. equisimilis	Pyogenic	Streptococcus dysgalactiae subsp. equisimilis	T642	Scaffold	2017/04/17	Haukeland University Hospital	ftp://ftp.ncbi.nlm.nih.gov/genomes/all/GCF/002/094/215/GCF_002094215.1_ASM209421v1
GCF_003202195.1	Y	MG_2	PRJNA224116	SAMN09224878	F	na	Streptococcus dysgalactiae subsp. equisimilis	Pyogenic	Streptococcus dysgalactiae subsp. equisimilis	SS1575	Contig	2018/06/07	University of Notre Dame	ftp://ftp.ncbi.nlm.nih.gov/genomes/all/GCF/003/202/195/GCF_003202195.1_ASM320219v1
GCF_900169605.1	Y	MG_2	PRJNA224116	SAMEA103910974	F	na	Streptococcus dysgalactiae subsp. equisimilis	Pyogenic	Streptococcus dysgalactiae subsp. equisimilis	C161L1	Contig	2017/03/21	HELMHOLTZ CENTER FOR INFECTION RESEARCH	ftp://ftp.ncbi.nlm.nih.gov/genomes/all/GCF/900/169/605/GCF_900169605.1_C161SL1
GCF_900460145.1	Y	MG_2	PRJNA224116	SAMEA3956098	F	na	Streptococcus dysgalactiae subsp. equisimilis	Pyogenic	Streptococcus dysgalactiae subsp. equisimilis	NCTC8543	Contig	2018/08/01	SC	ftp://ftp.ncbi.nlm.nih.gov/genomes/all/GCF/900/460/145/GCF_900460145.1_46514_B01
GCF_900460375.1	Y	MG_2	PRJNA224116	SAMEA3672885	F	na	Streptococcus dysgalactiae subsp. equisimilis	Pyogenic	Streptococcus dysgalactiae subsp. equisimilis	NCTC11564	Contig	2018/08/01	SC	ftp://ftp.ncbi.nlm.nih.gov/genomes/all/GCF/900/460/375/GCF_900460375.1_42925_F01
GCF_900474785.1	Y	MG_2	PRJNA224116	SAMEA3542434	F	na	Streptococcus dysgalactiae subsp. equisimilis	Pyogenic	Streptococcus dysgalactiae subsp. equisimilis	NCTC5370	Complete	2018/06/18	SC	ftp://ftp.ncbi.nlm.nih.gov/genomes/all/GCF/900/474/785/GCF_900474785.1_41767_C01
GCF_900475145.1	Y	MG_2	PRJNA224116	SAMEA3649038	F	na	Streptococcus dysgalactiae subsp. equisimilis	Pyogenic	Streptococcus dysgalactiae subsp. equisimilis	NCTC5371	Complete	2018/06/17	SC	ftp://ftp.ncbi.nlm.nih.gov/genomes/all/GCF/900/475/145/GCF_900475145.1_42727_G01
GCF_900475185.1	Y	MG_2	PRJNA224116	SAMEA3614273	F	na	Streptococcus dysgalactiae subsp. equisimilis	Pyogenic	Streptococcus dysgalactiae subsp. equisimilis	NCTC6179	Complete	2018/06/17	SC	ftp://ftp.ncbi.nlm.nih.gov/genomes/all/GCF/900/475/185/GCF_900475185.1_42197_A02
GCF_900475255.1	Y	MG_2	PRJNA224116	SAMEA3643308	F	na	Streptococcus dysgalactiae subsp. equisimilis	Pyogenic	Streptococcus dysgalactiae subsp. equisimilis	NCTC9414	Complete	2018/06/17	SC	ftp://ftp.ncbi.nlm.nih.gov/genomes/all/GCF/900/475/255/GCF_900475255.1_42545_F02
GCF_900475725.1	Y	MG_2	PRJNA224116	SAMEA3930552	F	na	Streptococcus dysgalactiae subsp. equisimilis	Pyogenic	Streptococcus dysgalactiae subsp. equisimilis	NCTC7136	Complete	2018/06/17	SC	ftp://ftp.ncbi.nlm.nih.gov/genomes/all/GCF/900/475/725/GCF_900475725.1_46166_D01
GCF_901542365.1	Y	MG_2	PRJNA224116	SAMEA3572421	F	na	Streptococcus dysgalactiae subsp. equisimilis	Pyogenic	Streptococcus dysgalactiae subsp. equisimilis	NCTC8546	Complete	2019/05/17	SC	ftp://ftp.ncbi.nlm.nih.gov/genomes/all/GCF/901/542/365/GCF_901542365.1_41825_F01
GCF_901543615.1	Y	MG_2	PRJNA224116	SAMEA3662921	F	na	Streptococcus dysgalactiae subsp. equisimilis	Pyogenic	Streptococcus dysgalactiae subsp. equisimilis	NCTC9413	Complete	2019/05/17	SC	ftp://ftp.ncbi.nlm.nih.gov/genomes/all/GCF/901/543/615/GCF_901543615.1_42731_E02
GCF_901543995.1	Y	MG_2	PRJNA224116	SAMEA3662927	F	na	Streptococcus dysgalactiae subsp. equisimilis	Pyogenic	Streptococcus dysgalactiae subsp. equisimilis	NCTC11554	Complete	2019/05/17	SC	ftp://ftp.ncbi.nlm.nih.gov/genomes/all/GCF/901/543/995/GCF_901543995.1_42880_D01
GCF_901544215.1	Y	MG_2	PRJNA224116	SAMEA3662929	F	na	Streptococcus dysgalactiae subsp. equisimilis	Pyogenic	Streptococcus dysgalactiae subsp. equisimilis	NCTC11556	Complete	2019/05/17	SC	ftp://ftp.ncbi.nlm.nih.gov/genomes/all/GCF/901/544/215/GCF_901544215.1_42880_F01
GCF_000317855.1	Y	MG_2	PRJNA224116	SAMEA3138428	F	representative genome	Streptococcus dysgalactiae subsp. equisimilis	Pyogenic	Streptococcus dysgalactiae subsp. equisimilis AC-2713	AC-2713	Complete	2012/10/31	DWI an der RWTH Aachen e. V.	ftp://ftp.ncbi.nlm.nih.gov/genomes/all/GCF/000/317/855/GCF_000317855.1_ASM31785v1
GCF_001704525.1	Y	MG_2	PRJNA224116	SAMN05449652	F	na	Streptococcus dysgalactiae subsp. equisimilis	Pyogenic	Streptococcus dysgalactiae subsp. equisimilis AKSDE4288	AKSDE4288	Contig	2016/08/13	Laboratory of Molecular Evolution and Bacterial Pathogenesis, Univ. of Louisville, KY	ftp://ftp.ncbi.nlm.nih.gov/genomes/all/GCF/001/704/525/GCF_001704525.1_ASM170452v1
GCF_000188715.1	Y	MG_2	PRJNA224116	SAMN02603163	F	na	Streptococcus dysgalactiae subsp. equisimilis	Pyogenic	Streptococcus dysgalactiae subsp. equisimilis ATCC 12394	ATCC 12394	Complete	2011/02/10	Cornell University	ftp://ftp.ncbi.nlm.nih.gov/genomes/all/GCF/000/188/715/GCF_000188715.1_ASM18871v1
GCF_000010705.1	Y	MG_2	PRJNA224116	SAMD00060937	F	na	Streptococcus dysgalactiae subsp. equisimilis	Pyogenic	Streptococcus dysgalactiae subsp. equisimilis GGS_124	GGS_124	Complete	2009/06/30	Research Institute, International Medical Center of Japan	ftp://ftp.ncbi.nlm.nih.gov/genomes/all/GCF/000/010/705/GCF_000010705.1_ASM1070v1
GCF_000307185.1	Y	MG_2	PRJNA224116	SAMD00060962	F	na	Streptococcus dysgalactiae subsp. equisimilis	Pyogenic	Streptococcus dysgalactiae subsp. equisimilis RE378	RE378	Complete	2012/10/03	Kitasato University	ftp://ftp.ncbi.nlm.nih.gov/genomes/all/GCF/000/307/185/GCF_000307185.1_ASM30718v1
GCF_000221105.1	Y	MG_2	PRJNA224116	SAMN00621724	F	na	Streptococcus dysgalactiae subsp. equisimilis	Pyogenic	Streptococcus dysgalactiae subsp. equisimilis SK1250	SK1250	Contig	2011/07/21	J. Craig Venter Institute	ftp://ftp.ncbi.nlm.nih.gov/genomes/all/GCF/000/221/105/GCF_000221105.1_ASM22110v2
GCF_900459405.1	Y	MG_20	PRJNA224116	SAMEA3594353	F	na	Streptococcus hyointestinalis	-	Streptococcus hyointestinalis	NCTC12224	Contig	2018/08/01	SC	ftp://ftp.ncbi.nlm.nih.gov/genomes/all/GCF/900/459/405/GCF_900459405.1_41965_B01
GCF_000380105.1	Y	MG_200	PRJNA224116	SAMN02256410	F	representative genome	Streptococcus orisratti	-	Streptococcus orisratti DSM 15617	DSM 15617	Scaffold	2013/04/23	DOE Joint Genome Institute	ftp://ftp.ncbi.nlm.nih.gov/genomes/all/GCF/000/380/105/GCF_000380105.1_ASM38010v1
GCF_001579045.1	Y	MG_201	PRJNA224116	SAMN04325060	F	na	Streptococcus mitis	Mitis	Streptococcus mitis	DD28	Scaffold	2016/03/02	University of Kaiserslautern	ftp://ftp.ncbi.nlm.nih.gov/genomes/all/GCF/001/579/045/GCF_001579045.1_ASM157904v1
GCF_001808705.1	Y	MG_202	PRJNA224116	SAMN04477510	F	na	Streptococcus sp.	Mitis	Streptococcus sp. HMSC074B11	HMSC074B11	Scaffold	2016/10/21	The Genome Institute at Washington University	ftp://ftp.ncbi.nlm.nih.gov/genomes/all/GCF/001/808/705/GCF_001808705.1_ASM180870v1
GCF_001375655.1	Y	MG_203	PRJNA224116	SAMEA3312815	F	representative genome	Streptococcus varani	-	Streptococcus varani	FF10	Contig	2015/04/22	URMITE	ftp://ftp.ncbi.nlm.nih.gov/genomes/all/GCF/001/375/655/GCF_001375655.1_PRJEB8936_assembly_1
GCF_000235485.1	Y	MG_204	PRJNA224116	SAMN02299440	F	na	Streptococcus oralis subsp. dentisani	Mitis	Streptococcus sp. oral taxon 058 str. F0407	F0407	Scaffold	2011/11/16	Genome Sequencing Center (GSC) at Washington University (WashU) School of Medicine	ftp://ftp.ncbi.nlm.nih.gov/genomes/all/GCF/000/235/485/GCF_000235485.1_ASM23548v1
GCF_001811505.1	Y	MG_205	PRJNA224116	SAMN04477621	F	na	Streptococcus sp.	Mitis	Streptococcus sp. HMSC034E03	HMSC034E03	Scaffold	2016/10/21	The Genome Institute at Washington University	ftp://ftp.ncbi.nlm.nih.gov/genomes/all/GCF/001/811/505/GCF_001811505.1_ASM181150v1
GCF_000187995.2	Y	MG_206	PRJNA224116	SAMN02436328	F	representative genome	Streptococcus macacae	Mutans	Streptococcus macacae NCTC 11558	NCTC 11558	Contig	2011/11/18	JCVI	ftp://ftp.ncbi.nlm.nih.gov/genomes/all/GCF/000/187/995/GCF_000187995.2_ASM18799v3
GCF_000379985.1	Y	MG_207	PRJNA224116	SAMN02256438	F	representative genome	Streptococcus caballi	-	Streptococcus caballi DSM 19004	DSM 19004	Scaffold	2013/04/23	DOE Joint Genome Institute	ftp://ftp.ncbi.nlm.nih.gov/genomes/all/GCF/000/379/985/GCF_000379985.1_ASM37998v1
GCF_001579175.1	Y	MG_208	PRJNA224116	SAMN04325051	Y	na	Streptococcus oralis	Mitis	Streptococcus oralis	DD24	Scaffold	2016/03/02	University of Kaiserslautern	ftp://ftp.ncbi.nlm.nih.gov/genomes/all/GCF/001/579/175/GCF_001579175.1_ASM157917v1
GCF_000148545.1	Y	MG_209	PRJNA224116	SAMN00001435	F	na	Streptococcus mitis	Mitis	Streptococcus mitis SK597	SK597	Contig	2010/09/24	University of Maryland Institute for Genome Sciences	ftp://ftp.ncbi.nlm.nih.gov/genomes/all/GCF/000/148/545/GCF_000148545.1_ASM14854v1
GCF_000971665.1	Y	MG_21	PRJNA224116	SAMN02850632	F	na	Streptococcus thermophilus	Salivarius	Streptococcus thermophilus	SMQ-301	Complete	2015/04/13	Universite Laval	ftp://ftp.ncbi.nlm.nih.gov/genomes/all/GCF/000/971/665/GCF_000971665.1_ASM97166v1
GCF_001705585.1	Y	MG_21	PRJNA224116	SAMN05465222	F	na	Streptococcus thermophilus	Salivarius	Streptococcus thermophilus	KLDS 3.1003	Complete	2016/08/16	Key Laboratory of Dairy Science, Ministry of Education	ftp://ftp.ncbi.nlm.nih.gov/genomes/all/GCF/001/705/585/GCF_001705585.1_ASM170558v1
GCF_001867245.1	Y	MG_21	PRJNA224116	SAMN05463208	F	na	Streptococcus thermophilus	Salivarius	Streptococcus thermophilus	UC8547	Contig	2016/11/07	Universita Cattolica del Sacro Cuore	ftp://ftp.ncbi.nlm.nih.gov/genomes/all/GCF/001/867/245/GCF_001867245.1_ASM186724v1
GCF_002286255.1	Y	MG_21	PRJNA224116	SAMN05631197	F	na	Streptococcus thermophilus	Salivarius	Streptococcus thermophilus	ST3	Complete	2017/09/05	Korea Food Research Institute	ftp://ftp.ncbi.nlm.nih.gov/genomes/all/GCF/002/286/255/GCF_002286255.1_ASM228625v1
GCF_002443035.1	Y	MG_21	PRJNA224116	SAMN07369158	F	na	Streptococcus thermophilus	Salivarius	Streptococcus thermophilus	B59671	Complete	2017/10/04	USDA-Agricultural Research Service-Eastern Regional Research Center	ftp://ftp.ncbi.nlm.nih.gov/genomes/all/GCF/002/443/035/GCF_002443035.1_ASM244303v1
GCF_002796635.1	Y	MG_21	PRJNA224116	SAMN08049013	F	na	Streptococcus thermophilus	Salivarius	Streptococcus thermophilus	St-9	Contig	2017/11/27	IPLA-CSIC	ftp://ftp.ncbi.nlm.nih.gov/genomes/all/GCF/002/796/635/GCF_002796635.1_ASM279663v1
GCF_002796645.1	Y	MG_21	PRJNA224116	SAMN08049014	F	na	Streptococcus thermophilus	Salivarius	Streptococcus thermophilus	St-10	Contig	2017/11/27	IPLA-CSIC	ftp://ftp.ncbi.nlm.nih.gov/genomes/all/GCF/002/796/645/GCF_002796645.1_ASM279664v1
GCF_002796655.1	Y	MG_21	PRJNA224116	SAMN08049012	F	na	Streptococcus thermophilus	Salivarius	Streptococcus thermophilus	St-6	Contig	2017/11/27	IPLA-CSIC	ftp://ftp.ncbi.nlm.nih.gov/genomes/all/GCF/002/796/655/GCF_002796655.1_ASM279665v1
GCF_002796705.1	Y	MG_21	PRJNA224116	SAMN08049010	F	na	Streptococcus thermophilus	Salivarius	Streptococcus thermophilus	St-2	Contig	2017/11/27	IPLA-CSIC	ftp://ftp.ncbi.nlm.nih.gov/genomes/all/GCF/002/796/705/GCF_002796705.1_ASM279670v1
GCF_002846075.1	Y	MG_21	PRJNA224116	SAMN07792323	F	na	Streptococcus thermophilus	Salivarius	Streptococcus thermophilus	GABA	Complete	2017/12/21	Dairy Research Institute, Bright Dairy & Food Co.	ftp://ftp.ncbi.nlm.nih.gov/genomes/all/GCF/002/846/075/GCF_002846075.1_ASM284607v1
GCF_003402855.1	Y	MG_21	PRJNA224116	SAMN09715176	F	na	Streptococcus thermophilus	Salivarius	Streptococcus thermophilus	ST109	Complete	2018/08/18	USDA-Agricultural Research Service-Eastern Regional Research Center	ftp://ftp.ncbi.nlm.nih.gov/genomes/all/GCF/003/402/855/GCF_003402855.1_ASM340285v1
GCF_003443395.1	Y	MG_21	PRJNA224116	SAMN09909637	F	na	Streptococcus thermophilus	Salivarius	Streptococcus thermophilus	ST106	Complete	2018/09/03	USDA-Agricultural Research Service-Eastern Regional Research Center	ftp://ftp.ncbi.nlm.nih.gov/genomes/all/GCF/003/443/395/GCF_003443395.1_ASM344339v1
GCF_004114735.1	Y	MG_21	PRJNA224116	SAMN10782595	F	na	Streptococcus thermophilus	Salivarius	Streptococcus thermophilus	IDCC2201	Complete	2019/01/28	Research Laboratories, Ildong Pharmaceutical	ftp://ftp.ncbi.nlm.nih.gov/genomes/all/GCF/004/114/735/GCF_004114735.1_ASM411473v1
GCF_005864465.1	Y	MG_21	PRJNA224116	SAMN11653956	F	na	Streptococcus thermophilus	Salivarius	Streptococcus thermophilus	FAM 13496	Contig	2019/05/23	Agroscope	ftp://ftp.ncbi.nlm.nih.gov/genomes/all/GCF/005/864/465/GCF_005864465.1_ASM586446v1
GCF_900094135.1	Y	MG_21	PRJNA224116	SAMEA4355128	F	na	Streptococcus thermophilus	Salivarius	Streptococcus thermophilus	ACA-DC 2	Complete	2016/08/03	Agricultural University of Athens	ftp://ftp.ncbi.nlm.nih.gov/genomes/all/GCF/900/094/135/GCF_900094135.1_ASM90009413v1
GCF_900474985.1	Y	MG_21	PRJNA224116	SAMEA3594354	F	na	Streptococcus thermophilus	Salivarius	Streptococcus thermophilus	NCTC12958	Complete	2018/06/17	SC	ftp://ftp.ncbi.nlm.nih.gov/genomes/all/GCF/900/474/985/GCF_900474985.1_41965_C01
GCF_900492165.1	Y	MG_21	PRJNA224116	SAMEA4729876	F	na	Streptococcus thermophilus	Salivarius	Streptococcus thermophilus	N4L	Complete	2018/07/03	INRA (INRA Jouy en Josas)	ftp://ftp.ncbi.nlm.nih.gov/genomes/all/GCF/900/492/165/GCF_900492165.1_chr1
GCF_000836595.1	Y	MG_21	PRJNA224116	SAMN02442659	F	na	Streptococcus thermophilus	Salivarius	Streptococcus thermophilus 1F8CT	1F8CT	Chromosome	2015/02/18	University of Padua	ftp://ftp.ncbi.nlm.nih.gov/genomes/all/GCF/000/836/595/GCF_000836595.1_1F8CTVE
GCF_000698885.1	Y	MG_21	PRJNA224116	SAMN02770279	F	na	Streptococcus thermophilus	Salivarius	Streptococcus thermophilus ASCC 1275	ASCC 1275	Complete	2014/06/06	The University of Hong Kong	ftp://ftp.ncbi.nlm.nih.gov/genomes/all/GCF/000/698/885/GCF_000698885.1_ASM69888v1
GCF_000011845.1	Y	MG_21	PRJNA224116	SAMN02603344	F	na	Streptococcus thermophilus	Salivarius	Streptococcus thermophilus CNRZ1066	CNRZ1066	Complete	2004/11/15	Institut National de la Recherche Agronomique, France	ftp://ftp.ncbi.nlm.nih.gov/genomes/all/GCF/000/011/845/GCF_000011845.1_ASM1184v1
GCF_000253395.1	Y	MG_21	PRJNA224116	SAMEA2272807	F	representative genome	Streptococcus thermophilus	Salivarius	Streptococcus thermophilus JIM 8232	JIM 8232	Complete	2011/07/04	Institut National de la Recherche Agronomique (INRA)	ftp://ftp.ncbi.nlm.nih.gov/genomes/all/GCF/000/253/395/GCF_000253395.1_ASM25339v1
GCF_000014485.1	Y	MG_21	PRJNA224116	SAMN02598313	F	na	Streptococcus thermophilus	Salivarius	Streptococcus thermophilus LMD-9	LMD-9	Complete	2006/10/13	US DOE Joint Genome Institute (JGI), The Lactic Acid Bacteria Genome Consortium and Fidelity Systems Inc.	ftp://ftp.ncbi.nlm.nih.gov/genomes/all/GCF/000/014/485/GCF_000014485.1_ASM1448v1
GCF_000011825.1	Y	MG_21	PRJNA224116	SAMN02604079	F	na	Streptococcus thermophilus	Salivarius	Streptococcus thermophilus LMG 18311	LMG 18311	Complete	2004/11/15	Univ. Catholique de Louvain, Belgium	ftp://ftp.ncbi.nlm.nih.gov/genomes/all/GCF/000/011/825/GCF_000011825.1_ASM1182v1
GCF_000521265.1	Y	MG_21	PRJNA224116	SAMN02437282	F	na	Streptococcus thermophilus	Salivarius	Streptococcus thermophilus M17PTZA496	M17PTZA496	Chromosome	2014/01/24	University of Padua	ftp://ftp.ncbi.nlm.nih.gov/genomes/all/GCF/000/521/265/GCF_000521265.1_M17PTZA496VE
GCF_000262675.1	Y	MG_21	PRJNA224116	SAMN02603848	F	na	Streptococcus thermophilus	Salivarius	Streptococcus thermophilus MN-ZLW-002	MN-ZLW-002	Complete	2012/05/14	School of Food Science and Engineering, Harbin Institute of Technology	ftp://ftp.ncbi.nlm.nih.gov/genomes/all/GCF/000/262/675/GCF_000262675.1_ASM26267v1
GCF_000335495.1	Y	MG_21	PRJNA224116	SAMN02470979	F	na	Streptococcus thermophilus	Salivarius	Streptococcus thermophilus MTCC 5461	MTCC 5461	Contig	2013/02/01	Anand Agricultural University	ftp://ftp.ncbi.nlm.nih.gov/genomes/all/GCF/000/335/495/GCF_000335495.1_ASM33549v1
GCF_000521325.1	Y	MG_21	PRJNA224116	SAMN02437281	F	na	Streptococcus thermophilus	Salivarius	Streptococcus thermophilus MTH17CL396	MTH17CL396	Chromosome	2014/01/24	University of Padua	ftp://ftp.ncbi.nlm.nih.gov/genomes/all/GCF/000/521/325/GCF_000521325.1_MTH17CL396VE
GCF_000182875.1	Y	MG_21	PRJNA224116	SAMN02603938	F	na	Streptococcus thermophilus	Salivarius	Streptococcus thermophilus ND03	ND03	Complete	2010/11/19	The Key Laboratory of Dairy Biotechnology and Bioengineering, Education Ministry of P. R. China, Department of Food Science and Engineering, Inner Mongolia Agricultural University, China	ftp://ftp.ncbi.nlm.nih.gov/genomes/all/GCF/000/182/875/GCF_000182875.1_ASM18287v1
GCF_000521285.1	Y	MG_21	PRJNA224116	SAMN02401100	F	na	Streptococcus thermophilus	Salivarius	Streptococcus thermophilus TH1435	TH1435	Chromosome	2014/01/24	University of Padua	ftp://ftp.ncbi.nlm.nih.gov/genomes/all/GCF/000/521/285/GCF_000521285.1_TH1435VE
GCF_000521305.1	Y	MG_21	PRJNA224116	SAMN02402367	F	na	Streptococcus thermophilus	Salivarius	Streptococcus thermophilus TH1436	TH1436	Chromosome	2014/01/24	University of Padua	ftp://ftp.ncbi.nlm.nih.gov/genomes/all/GCF/000/521/305/GCF_000521305.1_TH1436VE
GCF_000572095.1	Y	MG_21	PRJNA224116	SAMN02442661	F	na	Streptococcus thermophilus	Salivarius	Streptococcus thermophilus TH1477	TH1477	Chromosome	2015/02/13	University of Padua	ftp://ftp.ncbi.nlm.nih.gov/genomes/all/GCF/000/572/095/GCF_000572095.1_TH1477VE
GCF_000572065.1	Y	MG_21	PRJNA224116	SAMN02442657	F	na	Streptococcus thermophilus	Salivarius	Streptococcus thermophilus TH982	TH982	Chromosome	2015/02/13	University of Padua	ftp://ftp.ncbi.nlm.nih.gov/genomes/all/GCF/000/572/065/GCF_000572065.1_TH982VE
GCF_000836675.1	Y	MG_21	PRJNA224116	SAMN02442656	F	na	Streptococcus thermophilus	Salivarius	Streptococcus thermophilus TH985	TH985	Chromosome	2015/02/18	University of Padua	ftp://ftp.ncbi.nlm.nih.gov/genomes/all/GCF/000/836/675/GCF_000836675.1_TH985VE
GCF_001921845.1	Y	MG_210	PRJNA224116	SAMN06174763	F	na	Streptococcus cuniculi	-	Streptococcus cuniculi	CCUG 65085	Contig	2016/12/24	Centers for Disease Control and Prevention	ftp://ftp.ncbi.nlm.nih.gov/genomes/all/GCF/001/921/845/GCF_001921845.1_ASM192184v1
GCF_001072315.1	Y	MG_211	PRJNA224116	SAMN03197520	F	na	Streptococcus mitis	Mitis	Streptococcus pseudopneumoniae	330_SPSE	Contig	2015/07/10	University of Washington	ftp://ftp.ncbi.nlm.nih.gov/genomes/all/GCF/001/072/315/GCF_001072315.1_ASM107231v1
GCF_001814775.1	Y	MG_212	PRJNA224116	SAMN04480408	F	na	Streptococcus sp.	Mitis	Streptococcus sp. HMSC067H01	HMSC067H01	Scaffold	2016/10/21	The Genome Institute at Washington University	ftp://ftp.ncbi.nlm.nih.gov/genomes/all/GCF/001/814/775/GCF_001814775.1_ASM181477v1
GCF_003086355.1	Y	MG_213	PRJNA224116	SAMN08990899	F	na	Streptococcus sp.	Mutans	Streptococcus sp. Z15	Z15	Complete	2018/08/27	National Institute for Communicable Disease Control and Prevention	ftp://ftp.ncbi.nlm.nih.gov/genomes/all/GCF/003/086/355/GCF_003086355.1_ASM308635v2
GCF_000380125.1	Y	MG_214	PRJNA224116	SAMN02256411	F	representative genome	Streptococcus ovis	-	Streptococcus ovis DSM 16829	DSM 16829	Scaffold	2013/04/23	DOE Joint Genome Institute	ftp://ftp.ncbi.nlm.nih.gov/genomes/all/GCF/000/380/125/GCF_000380125.1_ASM38012v1
GCF_003943515.1	Y	MG_215	PRJNA224116	SAMN09631683	F	na	Streptococcus cristatus	Mitis	Streptococcus cristatus	BCC41	Contig	2018/12/12	Clemson University	ftp://ftp.ncbi.nlm.nih.gov/genomes/all/GCF/003/943/515/GCF_003943515.1_ASM394351v1
GCF_000423725.1	Y	MG_216	PRJNA224116	SAMN02441502	F	na	Streptococcus devriesei	Mutans	Streptococcus devriesei DSM 19639	DSM 19639	Scaffold	2013/07/11	DOE Joint Genome Institute	ftp://ftp.ncbi.nlm.nih.gov/genomes/all/GCF/000/423/725/GCF_000423725.1_ASM42372v1
GCF_001578885.1	Y	MG_217	PRJNA224116	SAMN04324618	Y	na	Streptococcus sp.	-	Streptococcus sp. DD12	DD12	Scaffold	2016/03/02	University of Kaiserslautern	ftp://ftp.ncbi.nlm.nih.gov/genomes/all/GCF/001/578/885/GCF_001578885.1_ASM157888v1
GCF_000286075.1	Y	MG_218	PRJNA224116	SAMN02428953	F	representative genome	Streptococcus ratti	Mutans	Streptococcus ratti FA-1 = DSM 20564	FA-1	Contig	2012/08/08	Cornell University	ftp://ftp.ncbi.nlm.nih.gov/genomes/all/GCF/000/286/075/GCF_000286075.1_ASM28607v1
GCF_000380045.1	Y	MG_219	PRJNA224116	SAMN02256437	F	representative genome	Streptococcus marimammalium	-	Streptococcus marimammalium DSM 18627	DSM 18627	Scaffold	2013/04/23	DOE Joint Genome Institute	ftp://ftp.ncbi.nlm.nih.gov/genomes/all/GCF/000/380/045/GCF_000380045.1_ASM38004v1
GCF_000314795.2	Y	MG_22	PRJNA224116	SAMN02463946	F	na	Streptococcus sp.	Mitis	Streptococcus sp. F0442	F0442	Scaffold	2013/02/06	Broad Institute	ftp://ftp.ncbi.nlm.nih.gov/genomes/all/GCF/000/314/795/GCF_000314795.2_Strept_sp_F0442_V1
GCF_001642085.1	Y	MG_220	PRJNA224116	SAMN04534843	F	representative genome	Streptococcus pantholopis	Mutans	Streptococcus pantholopis	TA 26	Complete	2016/05/11	National Institute for Communicable Disease Control and Prevention	ftp://ftp.ncbi.nlm.nih.gov/genomes/all/GCF/001/642/085/GCF_001642085.1_ASM164208v1
GCF_001578865.1	Y	MG_221	PRJNA224116	SAMN04324617	Y	na	Streptococcus sp.	Mitis	Streptococcus sp. DD11	DD11	Scaffold	2016/03/02	University of Kaiserslautern	ftp://ftp.ncbi.nlm.nih.gov/genomes/all/GCF/001/578/865/GCF_001578865.1_ASM157886v1
GCF_001937065.1	Y	MG_222	PRJNA224116	SAMN05969983	F	na	Streptococcus sp.	Mutans	Streptococcus sp. 'caviae'	Cavy grass 6	Scaffold	2017/01/05	Wageningen University	ftp://ftp.ncbi.nlm.nih.gov/genomes/all/GCF/001/937/065/GCF_001937065.1_ASM193706v1
GCF_004569635.1	Y	MG_223	PRJNA224116	SAMN11126838	F	na	Streptococcus sp.	-	Streptococcus sp. LYSM12	LYSM12	Contig	2019/04/02	King's College London	ftp://ftp.ncbi.nlm.nih.gov/genomes/all/GCF/004/569/635/GCF_004569635.1_ASM456963v1
GCF_001431045.1	Y	MG_224	PRJNA224116	SAMD00042493	F	na	Streptococcus orisasini	Mutans	Streptococcus orisasini	SH06	Contig	2015/10/28	Kyushu University	ftp://ftp.ncbi.nlm.nih.gov/genomes/all/GCF/001/431/045/GCF_001431045.1_ASM143104v1
GCF_002871655.1	Y	MG_225	PRJNA224116	SAMN07511413	F	na	Streptococcus sp.	-	Streptococcus sp. UMB1385	UMB1385	Scaffold	2018/01/10	Loyola University Chicago	ftp://ftp.ncbi.nlm.nih.gov/genomes/all/GCF/002/871/655/GCF_002871655.1_ASM287165v1
GCF_001071995.1	Y	MG_226	PRJNA224116	SAMN03197456	F	na	Streptococcus sp.	-	Streptococcus sp. 263_SSPC	263_SSPC	Scaffold	2015/07/10	University of Washington	ftp://ftp.ncbi.nlm.nih.gov/genomes/all/GCF/001/071/995/GCF_001071995.1_ASM107199v1
GCF_900033555.1	Y	MG_227	PRJNA224116	SAMEA2383020	F	na	Streptococcus pneumoniae	-	Streptococcus pneumoniae	2842STDY5753564	Scaffold	2016/02/08	SC	ftp://ftp.ncbi.nlm.nih.gov/genomes/all/GCF/900/033/555/GCF_900033555.1_12754_1_95
GCF_900101445.1	Y	MG_23	PRJNA224116	SAMN05216392	F	na	Streptococcus equinus	Bovis	Streptococcus equinus	Sb05	Scaffold	2016/10/21	DOE - JOINT GENOME INSTITUTE	ftp://ftp.ncbi.nlm.nih.gov/genomes/all/GCF/900/101/445/GCF_900101445.1_IMG-taxon_2654588139_annotated_assembly
GCF_900101715.1	Y	MG_23	PRJNA224116	SAMN05216407	F	na	Streptococcus equinus	Bovis	Streptococcus equinus	Sb10	Contig	2016/10/21	DOE - JOINT GENOME INSTITUTE	ftp://ftp.ncbi.nlm.nih.gov/genomes/all/GCF/900/101/715/GCF_900101715.1_IMG-taxon_2654588134_annotated_assembly
GCF_900106895.1	Y	MG_23	PRJNA224116	SAMN05216415	F	na	Streptococcus equinus	Bovis	Streptococcus equinus	Sb17	Contig	2016/10/22	DOE - JOINT GENOME INSTITUTE	ftp://ftp.ncbi.nlm.nih.gov/genomes/all/GCF/900/106/895/GCF_900106895.1_IMG-taxon_2654588136_annotated_assembly
GCF_900110845.1	Y	MG_23	PRJNA224116	SAMN05216346	F	na	Streptococcus equinus	Bovis	Streptococcus equinus	Sb18	Contig	2016/10/31	DOE - JOINT GENOME INSTITUTE	ftp://ftp.ncbi.nlm.nih.gov/genomes/all/GCF/900/110/845/GCF_900110845.1_IMG-taxon_2654588130_annotated_assembly
GCF_900112385.1	Y	MG_23	PRJNA224116	SAMN05216408	F	na	Streptococcus equinus	Bovis	Streptococcus equinus	Sb13	Scaffold	2016/11/02	DOE - JOINT GENOME INSTITUTE	ftp://ftp.ncbi.nlm.nih.gov/genomes/all/GCF/900/112/385/GCF_900112385.1_IMG-taxon_2654588137_annotated_assembly
GCF_900115995.1	Y	MG_23	PRJNA224116	SAMN05216416	F	na	Streptococcus equinus	Bovis	Streptococcus equinus	Sb20	Scaffold	2016/11/02	DOE - JOINT GENOME INSTITUTE	ftp://ftp.ncbi.nlm.nih.gov/genomes/all/GCF/900/115/995/GCF_900115995.1_IMG-taxon_2654588135_annotated_assembly
GCF_000747205.1	Y	MG_23	PRJNA224116	SAMN01983952	F	na	Streptococcus equinus	Bovis	Streptococcus equinus JB1	JB1	Contig	2014/09/02	Frederick National Laboratory for Cancer Research	ftp://ftp.ncbi.nlm.nih.gov/genomes/all/GCF/000/747/205/GCF_000747205.1_Streptococcus_bovis_JB1
GCF_900459445.1	Y	MG_23	PRJNA224116	SAMEA3881063	F	na	Streptococcus infantarius	Bovis	Streptococcus infantarius	NCTC13760	Contig	2018/08/01	SC	ftp://ftp.ncbi.nlm.nih.gov/genomes/all/GCF/900/459/445/GCF_900459445.1_44927_G01
GCF_000246835.1	Y	MG_23	PRJNA224116	SAMN02603507	F	na	Streptococcus infantarius subsp. infantarius	Bovis	Streptococcus infantarius subsp. infantarius CJ18	CJ18	Complete	2012/02/06	Laboratory of Food Biotechnology ETH Zurich, Switzerland	ftp://ftp.ncbi.nlm.nih.gov/genomes/all/GCF/000/246/835/GCF_000246835.1_ASM24683v1
GCF_900108865.1	Y	MG_23	PRJNA224116	SAMN05216460	F	na	Streptococcus sp.	Bovis	Streptococcus sp. 45	45	Contig	2016/10/31	DOE - JOINT GENOME INSTITUTE	ftp://ftp.ncbi.nlm.nih.gov/genomes/all/GCF/900/108/865/GCF_900108865.1_IMG-taxon_2654588198_annotated_assembly
GCF_004352745.1	Y	MG_23	PRJNA224116	SAMN11036900	F	na	Streptococcus sp.	Bovis	Streptococcus sp. KCJ4932	KCJ4932	Contig	2019/03/14	University of Florida	ftp://ftp.ncbi.nlm.nih.gov/genomes/all/GCF/004/352/745/GCF_004352745.1_ASM435274v1
GCF_900187245.1	Y	MG_24	PRJNA224116	SAMEA4504048	F	na	Streptococcus acidominimus	-	Streptococcus acidominimus	NCTC11291	Complete	2017/08/15	SC	ftp://ftp.ncbi.nlm.nih.gov/genomes/all/GCF/900/187/245/GCF_900187245.1_51470_D02
GCF_000323065.2	Y	MG_24	PRJNA224116	SAMN01822993	F	na	Streptococcus agalactiae	-	Streptococcus agalactiae LMG 14747	LMG 14747	Contig	2013/05/24	The J. Craig Venter Institute	ftp://ftp.ncbi.nlm.nih.gov/genomes/all/GCF/000/323/065/GCF_000323065.2_ASM32306v2
GCF_000420785.1	Y	MG_24	PRJNA224116	SAMN02440576	F	na	Streptococcus hyovaginalis	-	Streptococcus hyovaginalis DSM 12219	DSM 12219	Scaffold	2013/07/09	DOE Joint Genome Institute	ftp://ftp.ncbi.nlm.nih.gov/genomes/all/GCF/000/420/785/GCF_000420785.1_ASM42078v1
GCF_000223335.1	Y	MG_25	PRJNA224116	SAMN00255230	F	na	Streptococcus infantis	Mitis	Streptococcus infantis X	X	Contig	2011/08/10	J. Craig Venter Institute	ftp://ftp.ncbi.nlm.nih.gov/genomes/all/GCF/000/223/335/GCF_000223335.1_ASM22333v2
GCF_000220085.1	Y	MG_26	PRJNA224116	SAMN00621705	F	na	Streptococcus mitis	Mitis	Streptococcus mitis SK1080	SK1080	Contig	2011/07/06	J. Craig Venter Institute	ftp://ftp.ncbi.nlm.nih.gov/genomes/all/GCF/000/220/085/GCF_000220085.1_ASM22008v2
GCF_000685585.1	Y	MG_27	PRJNA224116	SAMN02716923	F	na	Streptococcus pneumoniae	Mitis	Streptococcus pneumoniae	ASVL_JC_0001	Contig	2014/05/08	Cornell University	ftp://ftp.ncbi.nlm.nih.gov/genomes/all/GCF/000/685/585/GCF_000685585.1_ASVL_JC_0001v1
GCF_000762445.1	Y	MG_27	PRJNA224116	SAMN02641107	F	na	Streptococcus pneumoniae	Mitis	Streptococcus pneumoniae	ECC_3504	Scaffold	2014/10/02	Harvard Medical School / Massachusetts Eye and Ear Infirmary	ftp://ftp.ncbi.nlm.nih.gov/genomes/all/GCF/000/762/445/GCF_000762445.1_Sp_3504.v1.0
GCF_000762605.1	Y	MG_27	PRJNA224116	SAMN02641373	F	na	Streptococcus pneumoniae	Mitis	Streptococcus pneumoniae	ECC_3435	Scaffold	2014/10/02	Harvard Medical School / Massachusetts Eye and Ear Infirmary	ftp://ftp.ncbi.nlm.nih.gov/genomes/all/GCF/000/762/605/GCF_000762605.1_Sp_3435.v1.0
GCF_000817005.1	Y	MG_27	PRJNA224116	SAMN02725063	F	na	Streptococcus pneumoniae	Mitis	Streptococcus pneumoniae	NT_110_58	Complete	2015/01/09	University of Bern	ftp://ftp.ncbi.nlm.nih.gov/genomes/all/GCF/000/817/005/GCF_000817005.1_ASM81700v1
GCF_001083245.1	Y	MG_27	PRJNA224116	SAMEA1029308	F	na	Streptococcus pneumoniae	Mitis	Streptococcus pneumoniae	SMRU3069	Scaffold	2015/07/14	SC	ftp://ftp.ncbi.nlm.nih.gov/genomes/all/GCF/001/083/245/GCF_001083245.1_7054_5_21
GCF_001083445.1	Y	MG_27	PRJNA224116	SAMEA1029260	F	na	Streptococcus pneumoniae	Mitis	Streptococcus pneumoniae	SMRU2972	Scaffold	2015/07/14	SC	ftp://ftp.ncbi.nlm.nih.gov/genomes/all/GCF/001/083/445/GCF_001083445.1_7038_5_20
GCF_001084105.1	Y	MG_27	PRJNA224116	SAMEA1028672	F	na	Streptococcus pneumoniae	Mitis	Streptococcus pneumoniae	SMRU2509	Scaffold	2015/07/13	SC	ftp://ftp.ncbi.nlm.nih.gov/genomes/all/GCF/001/084/105/GCF_001084105.1_6925_7_13
GCF_001084185.1	Y	MG_27	PRJNA224116	SAMEA1028895	F	na	Streptococcus pneumoniae	Mitis	Streptococcus pneumoniae	21	Scaffold	2015/07/13	SC	ftp://ftp.ncbi.nlm.nih.gov/genomes/all/GCF/001/084/185/GCF_001084185.1_6972_4_12
GCF_001084305.1	Y	MG_27	PRJNA224116	SAMEA1023821	F	na	Streptococcus pneumoniae	Mitis	Streptococcus pneumoniae	23A	Scaffold	2015/07/11	SC	ftp://ftp.ncbi.nlm.nih.gov/genomes/all/GCF/001/084/305/GCF_001084305.1_6593_4_17
GCF_001084505.1	Y	MG_27	PRJNA224116	SAMEA1032694	F	na	Streptococcus pneumoniae	Mitis	Streptococcus pneumoniae	27999	Contig	2015/07/29	SC	ftp://ftp.ncbi.nlm.nih.gov/genomes/all/GCF/001/084/505/GCF_001084505.1_6999_3_9
GCF_001085165.1	Y	MG_27	PRJNA224116	SAMEA1029391	F	na	Streptococcus pneumoniae	Mitis	Streptococcus pneumoniae	SMRU2990	Scaffold	2015/07/14	SC	ftp://ftp.ncbi.nlm.nih.gov/genomes/all/GCF/001/085/165/GCF_001085165.1_7038_6_14
GCF_001085305.1	Y	MG_27	PRJNA224116	SAMEA1029193	F	na	Streptococcus pneumoniae	Mitis	Streptococcus pneumoniae	SMRU3002	Scaffold	2015/07/14	SC	ftp://ftp.ncbi.nlm.nih.gov/genomes/all/GCF/001/085/305/GCF_001085305.1_7038_7_2
GCF_001085645.1	Y	MG_27	PRJNA224116	SAMEA1032723	F	na	Streptococcus pneumoniae	Mitis	Streptococcus pneumoniae	18044	Contig	2015/07/29	SC	ftp://ftp.ncbi.nlm.nih.gov/genomes/all/GCF/001/085/645/GCF_001085645.1_6999_3_7
GCF_001085805.1	Y	MG_27	PRJNA224116	SAMEA1028607	F	na	Streptococcus pneumoniae	Mitis	Streptococcus pneumoniae	SMRU2648	Contig	2015/07/13	SC	ftp://ftp.ncbi.nlm.nih.gov/genomes/all/GCF/001/085/805/GCF_001085805.1_6938_5_8
GCF_001085885.1	Y	MG_27	PRJNA224116	SAMEA1020830	F	na	Streptococcus pneumoniae	Mitis	Streptococcus pneumoniae	SPN4876	Scaffold	2015/07/16	SC	ftp://ftp.ncbi.nlm.nih.gov/genomes/all/GCF/001/085/885/GCF_001085885.1_6570_3_13
GCF_001086145.1	Y	MG_27	PRJNA224116	SAMEA1024204	F	na	Streptococcus pneumoniae	Mitis	Streptococcus pneumoniae	type strain: N	Scaffold	2015/07/11	SC	ftp://ftp.ncbi.nlm.nih.gov/genomes/all/GCF/001/086/145/GCF_001086145.1_6649_8_11
GCF_001087045.1	Y	MG_27	PRJNA224116	SAMEA1024556	F	na	Streptococcus pneumoniae	Mitis	Streptococcus pneumoniae	SMRU924	Scaffold	2015/07/11	SC	ftp://ftp.ncbi.nlm.nih.gov/genomes/all/GCF/001/087/045/GCF_001087045.1_6680_5_12
GCF_001087325.1	Y	MG_27	PRJNA224116	SAMEA1022767	F	na	Streptococcus pneumoniae	Mitis	Streptococcus pneumoniae	16188	Scaffold	2015/07/14	SC	ftp://ftp.ncbi.nlm.nih.gov/genomes/all/GCF/001/087/325/GCF_001087325.1_5737_2_8
GCF_001087665.1	Y	MG_27	PRJNA224116	SAMEA1024930	F	na	Streptococcus pneumoniae	Mitis	Streptococcus pneumoniae	SMRU964	Contig	2015/07/11	SC	ftp://ftp.ncbi.nlm.nih.gov/genomes/all/GCF/001/087/665/GCF_001087665.1_6680_7_4
GCF_001087865.1	Y	MG_27	PRJNA224116	SAMEA1032749	F	na	Streptococcus pneumoniae	Mitis	Streptococcus pneumoniae	R34-3149	Contig	2015/07/29	SC	ftp://ftp.ncbi.nlm.nih.gov/genomes/all/GCF/001/087/865/GCF_001087865.1_7001_3_13
GCF_001087965.1	Y	MG_27	PRJNA224116	SAMEA1028983	F	na	Streptococcus pneumoniae	Mitis	Streptococcus pneumoniae	SMRU2366	Scaffold	2015/07/14	SC	ftp://ftp.ncbi.nlm.nih.gov/genomes/all/GCF/001/087/965/GCF_001087965.1_6983_7_62
GCF_001088525.1	Y	MG_27	PRJNA224116	SAMEA1032465	F	na	Streptococcus pneumoniae	Mitis	Streptococcus pneumoniae	277394	Contig	2015/07/29	SC	ftp://ftp.ncbi.nlm.nih.gov/genomes/all/GCF/001/088/525/GCF_001088525.1_6999_6_11
GCF_001088585.1	Y	MG_27	PRJNA224116	SAMEA1024119	F	na	Streptococcus pneumoniae	Mitis	Streptococcus pneumoniae	type strain: N	Scaffold	2015/07/11	SC	ftp://ftp.ncbi.nlm.nih.gov/genomes/all/GCF/001/088/585/GCF_001088585.1_6641_6_10
GCF_001088825.1	Y	MG_27	PRJNA224116	SAMEA1029429	F	na	Streptococcus pneumoniae	Mitis	Streptococcus pneumoniae	SMRU3049	Scaffold	2015/07/14	SC	ftp://ftp.ncbi.nlm.nih.gov/genomes/all/GCF/001/088/825/GCF_001088825.1_7054_5_1
GCF_001088885.1	Y	MG_27	PRJNA224116	SAMEA1023834	F	na	Streptococcus pneumoniae	Mitis	Streptococcus pneumoniae	33B	Contig	2015/07/11	SC	ftp://ftp.ncbi.nlm.nih.gov/genomes/all/GCF/001/088/885/GCF_001088885.1_6593_4_16
GCF_001088925.1	Y	MG_27	PRJNA224116	SAMEA1026228	F	na	Streptococcus pneumoniae	Mitis	Streptococcus pneumoniae	SMRU2193	Scaffold	2015/07/13	SC	ftp://ftp.ncbi.nlm.nih.gov/genomes/all/GCF/001/088/925/GCF_001088925.1_6925_6_9
GCF_001089265.1	Y	MG_27	PRJNA224116	SAMEA769985	F	na	Streptococcus pneumoniae	Mitis	Streptococcus pneumoniae	14/4	Scaffold	2015/07/16	SC	ftp://ftp.ncbi.nlm.nih.gov/genomes/all/GCF/001/089/265/GCF_001089265.1_5242_3_12
GCF_001090465.1	Y	MG_27	PRJNA224116	SAMEA974686	F	na	Streptococcus pneumoniae	Mitis	Streptococcus pneumoniae	7B	Scaffold	2015/07/11	SC	ftp://ftp.ncbi.nlm.nih.gov/genomes/all/GCF/001/090/465/GCF_001090465.1_6259_5_6
GCF_001091045.1	Y	MG_27	PRJNA224116	SAMEA1025748	F	na	Streptococcus pneumoniae	Mitis	Streptococcus pneumoniae	SMRU2138	Contig	2015/07/13	SC	ftp://ftp.ncbi.nlm.nih.gov/genomes/all/GCF/001/091/045/GCF_001091045.1_6925_4_2
GCF_001091805.1	Y	MG_27	PRJNA224116	SAMEA770021	F	na	Streptococcus pneumoniae	Mitis	Streptococcus pneumoniae	18F/1	Contig	2015/07/15	SC	ftp://ftp.ncbi.nlm.nih.gov/genomes/all/GCF/001/091/805/GCF_001091805.1_5242_2_10
GCF_001091905.1	Y	MG_27	PRJNA224116	SAMEA1023686	F	na	Streptococcus pneumoniae	Mitis	Streptococcus pneumoniae	type strain: N	Contig	2015/07/11	SC	ftp://ftp.ncbi.nlm.nih.gov/genomes/all/GCF/001/091/905/GCF_001091905.1_6593_5_16
GCF_001092165.1	Y	MG_27	PRJNA224116	SAMEA1032689	F	na	Streptococcus pneumoniae	Mitis	Streptococcus pneumoniae	R34-3108	Contig	2015/07/29	SC	ftp://ftp.ncbi.nlm.nih.gov/genomes/all/GCF/001/092/165/GCF_001092165.1_7001_2_4
GCF_001092805.1	Y	MG_27	PRJNA224116	SAMEA1029435	F	na	Streptococcus pneumoniae	Mitis	Streptococcus pneumoniae	SMRU3003	Scaffold	2015/07/14	SC	ftp://ftp.ncbi.nlm.nih.gov/genomes/all/GCF/001/092/805/GCF_001092805.1_7038_7_3
GCF_001092905.1	Y	MG_27	PRJNA224116	SAMEA1483781	F	na	Streptococcus pneumoniae	Mitis	Streptococcus pneumoniae	PN2	Contig	2015/07/16	SC	ftp://ftp.ncbi.nlm.nih.gov/genomes/all/GCF/001/092/905/GCF_001092905.1_8016_3_82
GCF_001093305.1	Y	MG_27	PRJNA224116	SAMEA1024718	F	na	Streptococcus pneumoniae	Mitis	Streptococcus pneumoniae	SMRU651	Scaffold	2015/07/09	SC	ftp://ftp.ncbi.nlm.nih.gov/genomes/all/GCF/001/093/305/GCF_001093305.1_6730_5_3
GCF_001093665.1	Y	MG_27	PRJNA224116	SAMEA2061949	F	na	Streptococcus pneumoniae	Mitis	Streptococcus pneumoniae	19A	Scaffold	2015/07/14	SC	ftp://ftp.ncbi.nlm.nih.gov/genomes/all/GCF/001/093/665/GCF_001093665.1_9803_8_8
GCF_001093705.1	Y	MG_27	PRJNA224116	SAMEA1023881	F	na	Streptococcus pneumoniae	Mitis	Streptococcus pneumoniae	23A	Scaffold	2015/07/11	SC	ftp://ftp.ncbi.nlm.nih.gov/genomes/all/GCF/001/093/705/GCF_001093705.1_6631_4_4
GCF_001093805.1	Y	MG_27	PRJNA224116	SAMEA1025019	F	na	Streptococcus pneumoniae	Mitis	Streptococcus pneumoniae	SMRU975	Contig	2015/07/11	SC	ftp://ftp.ncbi.nlm.nih.gov/genomes/all/GCF/001/093/805/GCF_001093805.1_6680_7_15
GCF_001093905.1	Y	MG_27	PRJNA224116	SAMEA770011	F	na	Streptococcus pneumoniae	Mitis	Streptococcus pneumoniae	11C/1	Scaffold	2015/07/16	SC	ftp://ftp.ncbi.nlm.nih.gov/genomes/all/GCF/001/093/905/GCF_001093905.1_5192_8_7
GCF_001094205.1	Y	MG_27	PRJNA224116	SAMEA1025988	F	na	Streptococcus pneumoniae	Mitis	Streptococcus pneumoniae	SMRU2163	Scaffold	2015/07/13	SC	ftp://ftp.ncbi.nlm.nih.gov/genomes/all/GCF/001/094/205/GCF_001094205.1_6925_5_3
GCF_001094345.1	Y	MG_27	PRJNA224116	SAMEA1025854	F	na	Streptococcus pneumoniae	Mitis	Streptococcus pneumoniae	SMRU1786	Scaffold	2015/07/13	SC	ftp://ftp.ncbi.nlm.nih.gov/genomes/all/GCF/001/094/345/GCF_001094345.1_6871_1_10
GCF_001094565.1	Y	MG_27	PRJNA224116	SAMEA1022790	F	na	Streptococcus pneumoniae	Mitis	Streptococcus pneumoniae	0246	Scaffold	2015/07/14	SC	ftp://ftp.ncbi.nlm.nih.gov/genomes/all/GCF/001/094/565/GCF_001094565.1_5750_2_6
GCF_001094865.1	Y	MG_27	PRJNA224116	SAMEA974632	F	na	Streptococcus pneumoniae	Mitis	Streptococcus pneumoniae	type strain: N	Scaffold	2015/07/11	SC	ftp://ftp.ncbi.nlm.nih.gov/genomes/all/GCF/001/094/865/GCF_001094865.1_6259_7_16
GCF_001095005.1	Y	MG_27	PRJNA224116	SAMEA1024940	F	na	Streptococcus pneumoniae	Mitis	Streptococcus pneumoniae	SMRU951	Scaffold	2015/07/09	SC	ftp://ftp.ncbi.nlm.nih.gov/genomes/all/GCF/001/095/005/GCF_001095005.1_6680_6_15
GCF_001095445.1	Y	MG_27	PRJNA224116	SAMEA1025598	F	na	Streptococcus pneumoniae	Mitis	Streptococcus pneumoniae	SMRU1510	Scaffold	2015/07/17	SC	ftp://ftp.ncbi.nlm.nih.gov/genomes/all/GCF/001/095/445/GCF_001095445.1_6753_2_21
GCF_001095485.1	Y	MG_27	PRJNA224116	SAMEA1032596	F	na	Streptococcus pneumoniae	Mitis	Streptococcus pneumoniae	388483	Contig	2015/07/29	SC	ftp://ftp.ncbi.nlm.nih.gov/genomes/all/GCF/001/095/485/GCF_001095485.1_6999_7_18
GCF_001095545.1	Y	MG_27	PRJNA224116	SAMEA1023666	F	na	Streptococcus pneumoniae	Mitis	Streptococcus pneumoniae	SMRU251	Contig	2015/07/11	SC	ftp://ftp.ncbi.nlm.nih.gov/genomes/all/GCF/001/095/545/GCF_001095545.1_6673_8_11
GCF_001095765.1	Y	MG_27	PRJNA224116	SAMEA1024739	F	na	Streptococcus pneumoniae	Mitis	Streptococcus pneumoniae	type strain: N	Scaffold	2015/07/11	SC	ftp://ftp.ncbi.nlm.nih.gov/genomes/all/GCF/001/095/765/GCF_001095765.1_6680_4_14
GCF_001095805.1	Y	MG_27	PRJNA224116	SAMEA1023779	F	na	Streptococcus pneumoniae	Mitis	Streptococcus pneumoniae	4	Scaffold	2015/07/11	SC	ftp://ftp.ncbi.nlm.nih.gov/genomes/all/GCF/001/095/805/GCF_001095805.1_6649_8_18
GCF_001095845.1	Y	MG_27	PRJNA224116	SAMEA1028829	F	na	Streptococcus pneumoniae	Mitis	Streptococcus pneumoniae	SMRU2405	Scaffold	2015/07/13	SC	ftp://ftp.ncbi.nlm.nih.gov/genomes/all/GCF/001/095/845/GCF_001095845.1_6949_1_5
GCF_001096145.1	Y	MG_27	PRJNA224116	SAMEA1022805	F	na	Streptococcus pneumoniae	Mitis	Streptococcus pneumoniae	0368	Contig	2015/07/14	SC	ftp://ftp.ncbi.nlm.nih.gov/genomes/all/GCF/001/096/145/GCF_001096145.1_5737_1_8
GCF_001096305.1	Y	MG_27	PRJNA224116	SAMEA1023880	F	na	Streptococcus pneumoniae	Mitis	Streptococcus pneumoniae	3	Contig	2015/07/11	SC	ftp://ftp.ncbi.nlm.nih.gov/genomes/all/GCF/001/096/305/GCF_001096305.1_6593_5_8
GCF_001096325.1	Y	MG_27	PRJNA224116	SAMEA1026063	F	na	Streptococcus pneumoniae	Mitis	Streptococcus pneumoniae	SMRU2242	Scaffold	2015/07/14	SC	ftp://ftp.ncbi.nlm.nih.gov/genomes/all/GCF/001/096/325/GCF_001096325.1_7038_8_34
GCF_001096585.1	Y	MG_27	PRJNA224116	SAMEA1029405	F	na	Streptococcus pneumoniae	Mitis	Streptococcus pneumoniae	33B	Scaffold	2015/07/14	SC	ftp://ftp.ncbi.nlm.nih.gov/genomes/all/GCF/001/096/585/GCF_001096585.1_7004_8_94
GCF_001096805.1	Y	MG_27	PRJNA224116	SAMEA1023917	F	na	Streptococcus pneumoniae	Mitis	Streptococcus pneumoniae	SMRU204	Scaffold	2015/07/11	SC	ftp://ftp.ncbi.nlm.nih.gov/genomes/all/GCF/001/096/805/GCF_001096805.1_6680_8_12
GCF_001096845.1	Y	MG_27	PRJNA224116	SAMEA1022922	F	na	Streptococcus pneumoniae	Mitis	Streptococcus pneumoniae	0157	Scaffold	2015/07/14	SC	ftp://ftp.ncbi.nlm.nih.gov/genomes/all/GCF/001/096/845/GCF_001096845.1_5737_7_1
GCF_001097085.1	Y	MG_27	PRJNA224116	SAMEA1022884	F	na	Streptococcus pneumoniae	Mitis	Streptococcus pneumoniae	0247	Contig	2015/07/14	SC	ftp://ftp.ncbi.nlm.nih.gov/genomes/all/GCF/001/097/085/GCF_001097085.1_5750_2_7
GCF_001097205.1	Y	MG_27	PRJNA224116	SAMEA1029038	F	na	Streptococcus pneumoniae	Mitis	Streptococcus pneumoniae	SMRU2597	Scaffold	2015/07/13	SC	ftp://ftp.ncbi.nlm.nih.gov/genomes/all/GCF/001/097/205/GCF_001097205.1_6972_4_5
GCF_001097865.1	Y	MG_27	PRJNA224116	SAMEA1888683	F	na	Streptococcus pneumoniae	Mitis	Streptococcus pneumoniae	SMRU545	Scaffold	2015/07/11	SC	ftp://ftp.ncbi.nlm.nih.gov/genomes/all/GCF/001/097/865/GCF_001097865.1_6649_7_17
GCF_001098045.1	Y	MG_27	PRJNA224116	SAMEA1020797	F	na	Streptococcus pneumoniae	Mitis	Streptococcus pneumoniae	LMG3367	Scaffold	2015/07/16	SC	ftp://ftp.ncbi.nlm.nih.gov/genomes/all/GCF/001/098/045/GCF_001098045.1_6187_7_13
GCF_001098245.1	Y	MG_27	PRJNA224116	SAMEA1022830	F	na	Streptococcus pneumoniae	Mitis	Streptococcus pneumoniae	FRV026	Contig	2015/07/14	SC	ftp://ftp.ncbi.nlm.nih.gov/genomes/all/GCF/001/098/245/GCF_001098245.1_5737_5_3
GCF_001098545.1	Y	MG_27	PRJNA224116	SAMEA1025253	F	na	Streptococcus pneumoniae	Mitis	Streptococcus pneumoniae	SMRU1311	Scaffold	2015/07/17	SC	ftp://ftp.ncbi.nlm.nih.gov/genomes/all/GCF/001/098/545/GCF_001098545.1_6736_8_15
GCF_001098965.1	Y	MG_27	PRJNA224116	SAMEA1023808	F	na	Streptococcus pneumoniae	Mitis	Streptococcus pneumoniae	28F	Scaffold	2015/07/11	SC	ftp://ftp.ncbi.nlm.nih.gov/genomes/all/GCF/001/098/965/GCF_001098965.1_6631_5_9
GCF_001099545.1	Y	MG_27	PRJNA224116	SAMEA1028771	F	na	Streptococcus pneumoniae	Mitis	Streptococcus pneumoniae	SMRU2718	Scaffold	2015/07/13	SC	ftp://ftp.ncbi.nlm.nih.gov/genomes/all/GCF/001/099/545/GCF_001099545.1_6938_8_6
GCF_001099725.1	Y	MG_27	PRJNA224116	SAMEA1028619	F	na	Streptococcus pneumoniae	Mitis	Streptococcus pneumoniae	SMRU2580	Scaffold	2015/07/13	SC	ftp://ftp.ncbi.nlm.nih.gov/genomes/all/GCF/001/099/725/GCF_001099725.1_6972_3_12
GCF_001100025.1	Y	MG_27	PRJNA224116	SAMEA1025811	F	na	Streptococcus pneumoniae	Mitis	Streptococcus pneumoniae	SMRU1997	Contig	2015/07/13	SC	ftp://ftp.ncbi.nlm.nih.gov/genomes/all/GCF/001/100/025/GCF_001100025.1_6823_7_5
GCF_001100405.1	Y	MG_27	PRJNA224116	SAMEA1023876	F	na	Streptococcus pneumoniae	Mitis	Streptococcus pneumoniae	type strain: N	Scaffold	2015/07/11	SC	ftp://ftp.ncbi.nlm.nih.gov/genomes/all/GCF/001/100/405/GCF_001100405.1_6631_4_5
GCF_001100545.1	Y	MG_27	PRJNA224116	SAMEA1020409	F	na	Streptococcus pneumoniae	Mitis	Streptococcus pneumoniae	LMG2050	Scaffold	2015/07/15	SC	ftp://ftp.ncbi.nlm.nih.gov/genomes/all/GCF/001/100/545/GCF_001100545.1_6187_6_18
GCF_001100725.1	Y	MG_27	PRJNA224116	SAMEA682370	F	na	Streptococcus pneumoniae	Mitis	Streptococcus pneumoniae	08B08622	Scaffold	2015/07/16	SC	ftp://ftp.ncbi.nlm.nih.gov/genomes/all/GCF/001/100/725/GCF_001100725.1_5366_6_6
GCF_001100745.1	Y	MG_27	PRJNA224116	SAMEA1024993	F	na	Streptococcus pneumoniae	Mitis	Streptococcus pneumoniae	SMRU1131	Scaffold	2015/07/17	SC	ftp://ftp.ncbi.nlm.nih.gov/genomes/all/GCF/001/100/745/GCF_001100745.1_6755_4_3
GCF_001100785.1	Y	MG_27	PRJNA224116	SAMEA1024027	F	na	Streptococcus pneumoniae	Mitis	Streptococcus pneumoniae	SMRU202	Contig	2015/07/11	SC	ftp://ftp.ncbi.nlm.nih.gov/genomes/all/GCF/001/100/785/GCF_001100785.1_6680_8_10
GCF_001100985.1	Y	MG_27	PRJNA224116	SAMEA1032583	F	na	Streptococcus pneumoniae	Mitis	Streptococcus pneumoniae	160986	Contig	2015/07/29	SC	ftp://ftp.ncbi.nlm.nih.gov/genomes/all/GCF/001/100/985/GCF_001100985.1_6999_5_8
GCF_001101245.1	Y	MG_27	PRJNA224116	SAMEA1020596	F	na	Streptococcus pneumoniae	Mitis	Streptococcus pneumoniae	PT76	Contig	2015/07/16	SC	ftp://ftp.ncbi.nlm.nih.gov/genomes/all/GCF/001/101/245/GCF_001101245.1_6569_4_8
GCF_001101325.1	Y	MG_27	PRJNA224116	SAMEA1025484	F	na	Streptococcus pneumoniae	Mitis	Streptococcus pneumoniae	SMRU1335	Scaffold	2015/07/13	SC	ftp://ftp.ncbi.nlm.nih.gov/genomes/all/GCF/001/101/325/GCF_001101325.1_6841_7_15
GCF_001101665.1	Y	MG_27	PRJNA224116	SAMEA1025546	F	na	Streptococcus pneumoniae	Mitis	Streptococcus pneumoniae	SMRU1623	Scaffold	2015/07/13	SC	ftp://ftp.ncbi.nlm.nih.gov/genomes/all/GCF/001/101/665/GCF_001101665.1_6807_3_15
GCF_001101745.1	Y	MG_27	PRJNA224116	SAMEA1026199	F	na	Streptococcus pneumoniae	Mitis	Streptococcus pneumoniae	SMRU1769	Scaffold	2015/07/13	SC	ftp://ftp.ncbi.nlm.nih.gov/genomes/all/GCF/001/101/745/GCF_001101745.1_6840_1_17
GCF_001101865.1	Y	MG_27	PRJNA224116	SAMEA1032570	F	na	Streptococcus pneumoniae	Mitis	Streptococcus pneumoniae	R34-3012	Contig	2015/07/29	SC	ftp://ftp.ncbi.nlm.nih.gov/genomes/all/GCF/001/101/865/GCF_001101865.1_6930_8_6
GCF_001101985.1	Y	MG_27	PRJNA224116	SAMEA1025728	F	na	Streptococcus pneumoniae	Mitis	Streptococcus pneumoniae	SMRU2201	Contig	2015/07/13	SC	ftp://ftp.ncbi.nlm.nih.gov/genomes/all/GCF/001/101/985/GCF_001101985.1_6925_6_17
GCF_001102285.1	Y	MG_27	PRJNA224116	SAMEA1028778	F	na	Streptococcus pneumoniae	Mitis	Streptococcus pneumoniae	SMRU2814	Scaffold	2015/07/14	SC	ftp://ftp.ncbi.nlm.nih.gov/genomes/all/GCF/001/102/285/GCF_001102285.1_7011_6_6
GCF_001102345.1	Y	MG_27	PRJNA224116	SAMEA1028920	F	na	Streptococcus pneumoniae	Mitis	Streptococcus pneumoniae	SMRU2550	Contig	2015/07/13	SC	ftp://ftp.ncbi.nlm.nih.gov/genomes/all/GCF/001/102/345/GCF_001102345.1_6972_2_6
GCF_001102965.1	Y	MG_27	PRJNA224116	SAMEA2062393	F	na	Streptococcus pneumoniae	Mitis	Streptococcus pneumoniae	5	Contig	2015/07/14	SC	ftp://ftp.ncbi.nlm.nih.gov/genomes/all/GCF/001/102/965/GCF_001102965.1_9803_8_71
GCF_001103085.1	Y	MG_27	PRJNA224116	SAMEA1020602	F	na	Streptococcus pneumoniae	Mitis	Streptococcus pneumoniae	PT582	Scaffold	2015/07/16	SC	ftp://ftp.ncbi.nlm.nih.gov/genomes/all/GCF/001/103/085/GCF_001103085.1_6569_4_7
GCF_001103465.1	Y	MG_27	PRJNA224116	SAMEA1029274	F	na	Streptococcus pneumoniae	Mitis	Streptococcus pneumoniae	SMRU3011	Scaffold	2015/07/14	SC	ftp://ftp.ncbi.nlm.nih.gov/genomes/all/GCF/001/103/465/GCF_001103465.1_7038_7_11
GCF_001103525.1	Y	MG_27	PRJNA224116	SAMEA1029044	F	na	Streptococcus pneumoniae	Mitis	Streptococcus pneumoniae	SMRU2568	Contig	2015/07/13	SC	ftp://ftp.ncbi.nlm.nih.gov/genomes/all/GCF/001/103/525/GCF_001103525.1_6972_2_24
GCF_001103785.1	Y	MG_27	PRJNA224116	SAMEA1025523	F	na	Streptococcus pneumoniae	Mitis	Streptococcus pneumoniae	SMRU1421	Contig	2015/07/17	SC	ftp://ftp.ncbi.nlm.nih.gov/genomes/all/GCF/001/103/785/GCF_001103785.1_6805_2_5
GCF_001104725.1	Y	MG_27	PRJNA224116	SAMEA770001	F	na	Streptococcus pneumoniae	Mitis	Streptococcus pneumoniae	23F/4	Contig	2015/07/16	SC	ftp://ftp.ncbi.nlm.nih.gov/genomes/all/GCF/001/104/725/GCF_001104725.1_5242_3_4
GCF_001105165.1	Y	MG_27	PRJNA224116	SAMEA1025028	F	na	Streptococcus pneumoniae	Mitis	Streptococcus pneumoniae	SMRU976	Scaffold	2015/07/11	SC	ftp://ftp.ncbi.nlm.nih.gov/genomes/all/GCF/001/105/165/GCF_001105165.1_6680_7_16
GCF_001106365.1	Y	MG_27	PRJNA224116	SAMEA2061744	F	na	Streptococcus pneumoniae	Mitis	Streptococcus pneumoniae	6A	Scaffold	2015/07/14	SC	ftp://ftp.ncbi.nlm.nih.gov/genomes/all/GCF/001/106/365/GCF_001106365.1_9803_8_37
GCF_001106485.1	Y	MG_27	PRJNA224116	SAMEA1029204	F	na	Streptococcus pneumoniae	Mitis	Streptococcus pneumoniae	SMRU2941	Scaffold	2015/07/14	SC	ftp://ftp.ncbi.nlm.nih.gov/genomes/all/GCF/001/106/485/GCF_001106485.1_7038_4_13
GCF_001106845.1	Y	MG_27	PRJNA224116	SAMEA1029397	F	na	Streptococcus pneumoniae	Mitis	Streptococcus pneumoniae	SMRU2946	Scaffold	2015/07/14	SC	ftp://ftp.ncbi.nlm.nih.gov/genomes/all/GCF/001/106/845/GCF_001106845.1_7038_4_18
GCF_001106925.1	Y	MG_27	PRJNA224116	SAMEA1025689	F	na	Streptococcus pneumoniae	Mitis	Streptococcus pneumoniae	SMRU1990	Scaffold	2015/07/13	SC	ftp://ftp.ncbi.nlm.nih.gov/genomes/all/GCF/001/106/925/GCF_001106925.1_6823_6_22
GCF_001107285.1	Y	MG_27	PRJNA224116	SAMEA1026102	F	na	Streptococcus pneumoniae	Mitis	Streptococcus pneumoniae	SMRU2191	Scaffold	2015/07/13	SC	ftp://ftp.ncbi.nlm.nih.gov/genomes/all/GCF/001/107/285/GCF_001107285.1_6925_6_7
GCF_001107605.1	Y	MG_27	PRJNA224116	SAMEA2061504	F	na	Streptococcus pneumoniae	Mitis	Streptococcus pneumoniae	23F	Contig	2015/07/14	SC	ftp://ftp.ncbi.nlm.nih.gov/genomes/all/GCF/001/107/605/GCF_001107605.1_9803_7_57
GCF_001107645.1	Y	MG_27	PRJNA224116	SAMEA1026221	F	na	Streptococcus pneumoniae	Mitis	Streptococcus pneumoniae	SMRU2061	Contig	2015/07/13	SC	ftp://ftp.ncbi.nlm.nih.gov/genomes/all/GCF/001/107/645/GCF_001107645.1_6899_5_21
GCF_001108145.1	Y	MG_27	PRJNA224116	SAMEA1028624	F	na	Streptococcus pneumoniae	Mitis	Streptococcus pneumoniae	SMRU2849	Contig	2015/07/14	SC	ftp://ftp.ncbi.nlm.nih.gov/genomes/all/GCF/001/108/145/GCF_001108145.1_7004_6_41
GCF_001108605.1	Y	MG_27	PRJNA224116	SAMEA1026043	F	na	Streptococcus pneumoniae	Mitis	Streptococcus pneumoniae	SMRU2258	Contig	2015/07/13	SC	ftp://ftp.ncbi.nlm.nih.gov/genomes/all/GCF/001/108/605/GCF_001108605.1_6983_3_50
GCF_001108985.1	Y	MG_27	PRJNA224116	SAMEA974688	F	na	Streptococcus pneumoniae	Mitis	Streptococcus pneumoniae	type strain: N	Scaffold	2015/07/11	SC	ftp://ftp.ncbi.nlm.nih.gov/genomes/all/GCF/001/108/985/GCF_001108985.1_6259_5_8
GCF_001109185.1	Y	MG_27	PRJNA224116	SAMEA1024847	F	na	Streptococcus pneumoniae	Mitis	Streptococcus pneumoniae	type strain: N	Scaffold	2015/07/11	SC	ftp://ftp.ncbi.nlm.nih.gov/genomes/all/GCF/001/109/185/GCF_001109185.1_6680_4_20
GCF_001109705.1	Y	MG_27	PRJNA224116	SAMEA1029369	F	na	Streptococcus pneumoniae	Mitis	Streptococcus pneumoniae	SMRU3046	Scaffold	2015/07/14	SC	ftp://ftp.ncbi.nlm.nih.gov/genomes/all/GCF/001/109/705/GCF_001109705.1_7054_4_22
GCF_001110145.1	Y	MG_27	PRJNA224116	SAMEA974695	F	na	Streptococcus pneumoniae	Mitis	Streptococcus pneumoniae	type strain: N	Contig	2015/07/11	SC	ftp://ftp.ncbi.nlm.nih.gov/genomes/all/GCF/001/110/145/GCF_001110145.1_6259_5_11
GCF_001110165.1	Y	MG_27	PRJNA224116	SAMEA1462995	F	na	Streptococcus pneumoniae	Mitis	Streptococcus pneumoniae	MD5096	Contig	2015/07/29	SC	ftp://ftp.ncbi.nlm.nih.gov/genomes/all/GCF/001/110/165/GCF_001110165.1_7622_5_61
GCF_001110265.1	Y	MG_27	PRJNA224116	SAMEA1024190	F	na	Streptococcus pneumoniae	Mitis	Streptococcus pneumoniae	40	Scaffold	2015/07/11	SC	ftp://ftp.ncbi.nlm.nih.gov/genomes/all/GCF/001/110/265/GCF_001110265.1_6649_8_12
GCF_001110365.1	Y	MG_27	PRJNA224116	SAMEA1029084	F	na	Streptococcus pneumoniae	Mitis	Streptococcus pneumoniae	SMRU2635	Contig	2015/07/13	SC	ftp://ftp.ncbi.nlm.nih.gov/genomes/all/GCF/001/110/365/GCF_001110365.1_6972_5_19
GCF_001110565.1	Y	MG_27	PRJNA224116	SAMEA1022777	F	na	Streptococcus pneumoniae	Mitis	Streptococcus pneumoniae	0240	Scaffold	2015/07/14	SC	ftp://ftp.ncbi.nlm.nih.gov/genomes/all/GCF/001/110/565/GCF_001110565.1_5750_2_5
GCF_001110705.1	Y	MG_27	PRJNA224116	SAMEA2061737	F	na	Streptococcus pneumoniae	Mitis	Streptococcus pneumoniae	9N	Contig	2015/07/14	SC	ftp://ftp.ncbi.nlm.nih.gov/genomes/all/GCF/001/110/705/GCF_001110705.1_9803_8_13
GCF_001110805.1	Y	MG_27	PRJNA224116	SAMEA1483777	F	na	Streptococcus pneumoniae	Mitis	Streptococcus pneumoniae	PN1	Contig	2015/07/16	SC	ftp://ftp.ncbi.nlm.nih.gov/genomes/all/GCF/001/110/805/GCF_001110805.1_8016_3_83
GCF_001110945.1	Y	MG_27	PRJNA224116	SAMEA1022847	F	na	Streptococcus pneumoniae	Mitis	Streptococcus pneumoniae	0314	Scaffold	2015/07/14	SC	ftp://ftp.ncbi.nlm.nih.gov/genomes/all/GCF/001/110/945/GCF_001110945.1_5756_7_6
GCF_001111925.1	Y	MG_27	PRJNA224116	SAMEA682592	F	na	Streptococcus pneumoniae	Mitis	Streptococcus pneumoniae	spnIC176	Scaffold	2015/07/16	SC	ftp://ftp.ncbi.nlm.nih.gov/genomes/all/GCF/001/111/925/GCF_001111925.1_5392_6_6
GCF_001112045.1	Y	MG_27	PRJNA224116	SAMEA1020051	F	na	Streptococcus pneumoniae	Mitis	Streptococcus pneumoniae	SN33007	Scaffold	2015/07/16	SC	ftp://ftp.ncbi.nlm.nih.gov/genomes/all/GCF/001/112/045/GCF_001112045.1_6678_3_17
GCF_001112385.1	Y	MG_27	PRJNA224116	SAMEA1029439	F	na	Streptococcus pneumoniae	Mitis	Streptococcus pneumoniae	SMRU3112	Contig	2015/07/14	SC	ftp://ftp.ncbi.nlm.nih.gov/genomes/all/GCF/001/112/385/GCF_001112385.1_7092_6_16
GCF_001112825.1	Y	MG_27	PRJNA224116	SAMEA1032594	F	na	Streptococcus pneumoniae	Mitis	Streptococcus pneumoniae	R34-3096	Contig	2015/07/29	SC	ftp://ftp.ncbi.nlm.nih.gov/genomes/all/GCF/001/112/825/GCF_001112825.1_7001_1_19
GCF_001113005.1	Y	MG_27	PRJNA224116	SAMEA1029385	F	na	Streptococcus pneumoniae	Mitis	Streptococcus pneumoniae	SMRU2991	Scaffold	2015/07/14	SC	ftp://ftp.ncbi.nlm.nih.gov/genomes/all/GCF/001/113/005/GCF_001113005.1_7038_6_15
GCF_001113045.1	Y	MG_27	PRJNA224116	SAMEA1025992	F	na	Streptococcus pneumoniae	Mitis	Streptococcus pneumoniae	SMRU1821	Scaffold	2015/07/13	SC	ftp://ftp.ncbi.nlm.nih.gov/genomes/all/GCF/001/113/045/GCF_001113045.1_6840_3_21
GCF_001113545.1	Y	MG_27	PRJNA224116	SAMEA1025857	F	na	Streptococcus pneumoniae	Mitis	Streptococcus pneumoniae	SMRU1795	Contig	2015/07/13	SC	ftp://ftp.ncbi.nlm.nih.gov/genomes/all/GCF/001/113/545/GCF_001113545.1_6871_1_19
GCF_001113565.1	Y	MG_27	PRJNA224116	SAMEA1023727	F	na	Streptococcus pneumoniae	Mitis	Streptococcus pneumoniae	24A	Contig	2015/07/11	SC	ftp://ftp.ncbi.nlm.nih.gov/genomes/all/GCF/001/113/565/GCF_001113565.1_6593_4_5
GCF_001113705.1	Y	MG_27	PRJNA224116	SAMEA1032681	F	na	Streptococcus pneumoniae	Mitis	Streptococcus pneumoniae	276430	Contig	2015/07/29	SC	ftp://ftp.ncbi.nlm.nih.gov/genomes/all/GCF/001/113/705/GCF_001113705.1_6999_6_10
GCF_001113845.1	Y	MG_27	PRJNA224116	SAMEA1026112	F	na	Streptococcus pneumoniae	Mitis	Streptococcus pneumoniae	SMRU1855	Scaffold	2015/07/13	SC	ftp://ftp.ncbi.nlm.nih.gov/genomes/all/GCF/001/113/845/GCF_001113845.1_6823_1_7
GCF_001113965.1	Y	MG_27	PRJNA224116	SAMEA1023965	F	na	Streptococcus pneumoniae	Mitis	Streptococcus pneumoniae	14	Scaffold	2015/07/11	SC	ftp://ftp.ncbi.nlm.nih.gov/genomes/all/GCF/001/113/965/GCF_001113965.1_6631_1_12
GCF_001114345.1	Y	MG_27	PRJNA224116	SAMEA1032511	F	na	Streptococcus pneumoniae	Mitis	Streptococcus pneumoniae	342672	Contig	2015/07/29	SC	ftp://ftp.ncbi.nlm.nih.gov/genomes/all/GCF/001/114/345/GCF_001114345.1_6999_7_5
GCF_001114725.1	Y	MG_27	PRJNA224116	SAMEA1022939	F	na	Streptococcus pneumoniae	Mitis	Streptococcus pneumoniae	0119	Scaffold	2015/07/14	SC	ftp://ftp.ncbi.nlm.nih.gov/genomes/all/GCF/001/114/725/GCF_001114725.1_5919_1_5
GCF_001115065.1	Y	MG_27	PRJNA224116	SAMEA1463292	F	na	Streptococcus pneumoniae	Mitis	Streptococcus pneumoniae	BR1114	Contig	2015/07/29	SC	ftp://ftp.ncbi.nlm.nih.gov/genomes/all/GCF/001/115/065/GCF_001115065.1_7622_2_41
GCF_001115145.1	Y	MG_27	PRJNA224116	SAMEA974704	F	na	Streptococcus pneumoniae	Mitis	Streptococcus pneumoniae	type strain: N	Contig	2015/07/11	SC	ftp://ftp.ncbi.nlm.nih.gov/genomes/all/GCF/001/115/145/GCF_001115145.1_6259_7_1
GCF_001115225.1	Y	MG_27	PRJNA224116	SAMEA1023919	F	na	Streptococcus pneumoniae	Mitis	Streptococcus pneumoniae	37	Scaffold	2015/07/11	SC	ftp://ftp.ncbi.nlm.nih.gov/genomes/all/GCF/001/115/225/GCF_001115225.1_6631_2_5
GCF_001115405.1	Y	MG_27	PRJNA224116	SAMEA1022823	F	na	Streptococcus pneumoniae	Mitis	Streptococcus pneumoniae	0312	Contig	2015/07/14	SC	ftp://ftp.ncbi.nlm.nih.gov/genomes/all/GCF/001/115/405/GCF_001115405.1_5756_7_4
GCF_001115465.1	Y	MG_27	PRJNA224116	SAMEA1026192	F	na	Streptococcus pneumoniae	Mitis	Streptococcus pneumoniae	SMRU1985	Scaffold	2015/07/13	SC	ftp://ftp.ncbi.nlm.nih.gov/genomes/all/GCF/001/115/465/GCF_001115465.1_6823_6_17
GCF_001115525.1	Y	MG_27	PRJNA224116	SAMEA1023840	F	na	Streptococcus pneumoniae	Mitis	Streptococcus pneumoniae	SMRU195	Scaffold	2015/07/11	SC	ftp://ftp.ncbi.nlm.nih.gov/genomes/all/GCF/001/115/525/GCF_001115525.1_6680_8_3
GCF_001116285.1	Y	MG_27	PRJNA224116	SAMEA1028700	F	na	Streptococcus pneumoniae	Mitis	Streptococcus pneumoniae	SMRU2585	Contig	2015/07/13	SC	ftp://ftp.ncbi.nlm.nih.gov/genomes/all/GCF/001/116/285/GCF_001116285.1_6972_3_17
GCF_001116385.1	Y	MG_27	PRJNA224116	SAMEA1023849	F	na	Streptococcus pneumoniae	Mitis	Streptococcus pneumoniae	type strain: N	Scaffold	2015/07/11	SC	ftp://ftp.ncbi.nlm.nih.gov/genomes/all/GCF/001/116/385/GCF_001116385.1_6593_5_6
GCF_001117265.1	Y	MG_27	PRJNA224116	SAMEA1024833	F	na	Streptococcus pneumoniae	Mitis	Streptococcus pneumoniae	type strain: N	Scaffold	2015/07/11	SC	ftp://ftp.ncbi.nlm.nih.gov/genomes/all/GCF/001/117/265/GCF_001117265.1_6680_4_18
GCF_001117505.1	Y	MG_27	PRJNA224116	SAMEA1025967	F	na	Streptococcus pneumoniae	Mitis	Streptococcus pneumoniae	SMRU1776	Contig	2015/07/13	SC	ftp://ftp.ncbi.nlm.nih.gov/genomes/all/GCF/001/117/505/GCF_001117505.1_6840_1_24
GCF_001117585.1	Y	MG_27	PRJNA224116	SAMEA1022800	F	na	Streptococcus pneumoniae	Mitis	Streptococcus pneumoniae	0127	Contig	2015/07/14	SC	ftp://ftp.ncbi.nlm.nih.gov/genomes/all/GCF/001/117/585/GCF_001117585.1_5919_1_9
GCF_001118105.1	Y	MG_27	PRJNA224116	SAMEA1025202	F	na	Streptococcus pneumoniae	Mitis	Streptococcus pneumoniae	SMRU1509	Scaffold	2015/07/17	SC	ftp://ftp.ncbi.nlm.nih.gov/genomes/all/GCF/001/118/105/GCF_001118105.1_6753_2_20
GCF_001118385.1	Y	MG_27	PRJNA224116	SAMEA1023810	F	na	Streptococcus pneumoniae	Mitis	Streptococcus pneumoniae	type strain: N	Scaffold	2015/07/11	SC	ftp://ftp.ncbi.nlm.nih.gov/genomes/all/GCF/001/118/385/GCF_001118385.1_6630_2_16
GCF_001119545.1	Y	MG_27	PRJNA224116	SAMEA1019974	F	na	Streptococcus pneumoniae	Mitis	Streptococcus pneumoniae	S-161	Contig	2015/07/16	SC	ftp://ftp.ncbi.nlm.nih.gov/genomes/all/GCF/001/119/545/GCF_001119545.1_6237_8_18
GCF_001119725.1	Y	MG_27	PRJNA224116	SAMEA1025726	F	na	Streptococcus pneumoniae	Mitis	Streptococcus pneumoniae	SMRU2084	Scaffold	2015/07/13	SC	ftp://ftp.ncbi.nlm.nih.gov/genomes/all/GCF/001/119/725/GCF_001119725.1_6899_6_20
GCF_001120365.1	Y	MG_27	PRJNA224116	SAMEA1024007	F	na	Streptococcus pneumoniae	Mitis	Streptococcus pneumoniae	3	Contig	2015/07/11	SC	ftp://ftp.ncbi.nlm.nih.gov/genomes/all/GCF/001/120/365/GCF_001120365.1_6631_2_2
GCF_001120485.1	Y	MG_27	PRJNA224116	SAMEA1025907	F	na	Streptococcus pneumoniae	Mitis	Streptococcus pneumoniae	SMRU1947	Scaffold	2015/07/13	SC	ftp://ftp.ncbi.nlm.nih.gov/genomes/all/GCF/001/120/485/GCF_001120485.1_6823_5_3
GCF_001121205.1	Y	MG_27	PRJNA224116	SAMEA1023973	F	na	Streptococcus pneumoniae	Mitis	Streptococcus pneumoniae	type strain: N	Scaffold	2015/07/11	SC	ftp://ftp.ncbi.nlm.nih.gov/genomes/all/GCF/001/121/205/GCF_001121205.1_6631_1_24
GCF_001121385.1	Y	MG_27	PRJNA224116	SAMEA1028719	F	na	Streptococcus pneumoniae	Mitis	Streptococcus pneumoniae	SMRU2360	Contig	2015/07/14	SC	ftp://ftp.ncbi.nlm.nih.gov/genomes/all/GCF/001/121/385/GCF_001121385.1_6983_7_56
GCF_001121565.1	Y	MG_27	PRJNA224116	SAMEA974703	F	na	Streptococcus pneumoniae	Mitis	Streptococcus pneumoniae	type strain: N	Scaffold	2015/07/11	SC	ftp://ftp.ncbi.nlm.nih.gov/genomes/all/GCF/001/121/565/GCF_001121565.1_6259_6_22
GCF_001122185.1	Y	MG_27	PRJNA224116	SAMEA1463266	F	na	Streptococcus pneumoniae	Mitis	Streptococcus pneumoniae	NP7012	Contig	2015/07/29	SC	ftp://ftp.ncbi.nlm.nih.gov/genomes/all/GCF/001/122/185/GCF_001122185.1_7553_4_31
GCF_001122245.1	Y	MG_27	PRJNA224116	SAMEA1029389	F	na	Streptococcus pneumoniae	Mitis	Streptococcus pneumoniae	SMRU3128	Contig	2015/07/14	SC	ftp://ftp.ncbi.nlm.nih.gov/genomes/all/GCF/001/122/245/GCF_001122245.1_7068_4_8
GCF_001122545.1	Y	MG_27	PRJNA224116	SAMEA1025496	F	na	Streptococcus pneumoniae	Mitis	Streptococcus pneumoniae	SMRU1183	Scaffold	2015/07/17	SC	ftp://ftp.ncbi.nlm.nih.gov/genomes/all/GCF/001/122/545/GCF_001122545.1_6755_6_7
GCF_001122785.1	Y	MG_27	PRJNA224116	SAMEA1023786	F	na	Streptococcus pneumoniae	Mitis	Streptococcus pneumoniae	type strain: N	Scaffold	2015/07/11	SC	ftp://ftp.ncbi.nlm.nih.gov/genomes/all/GCF/001/122/785/GCF_001122785.1_6631_2_10
GCF_001122945.1	Y	MG_27	PRJNA224116	SAMEA682584	F	na	Streptococcus pneumoniae	Mitis	Streptococcus pneumoniae	spnIC104	Scaffold	2015/07/16	SC	ftp://ftp.ncbi.nlm.nih.gov/genomes/all/GCF/001/122/945/GCF_001122945.1_5390_1_10
GCF_001123325.1	Y	MG_27	PRJNA224116	SAMEA1026087	F	na	Streptococcus pneumoniae	Mitis	Streptococcus pneumoniae	SMRU2268	Contig	2015/07/13	SC	ftp://ftp.ncbi.nlm.nih.gov/genomes/all/GCF/001/123/325/GCF_001123325.1_6983_3_60
GCF_001123905.1	Y	MG_27	PRJNA224116	SAMEA1025095	F	na	Streptococcus pneumoniae	Mitis	Streptococcus pneumoniae	SMRU972	Contig	2015/07/11	SC	ftp://ftp.ncbi.nlm.nih.gov/genomes/all/GCF/001/123/905/GCF_001123905.1_6680_7_12
GCF_001123925.1	Y	MG_27	PRJNA224116	SAMEA1023968	F	na	Streptococcus pneumoniae	Mitis	Streptococcus pneumoniae	6B	Scaffold	2015/07/11	SC	ftp://ftp.ncbi.nlm.nih.gov/genomes/all/GCF/001/123/925/GCF_001123925.1_6641_6_24
GCF_001123985.1	Y	MG_27	PRJNA224116	SAMEA1025469	F	na	Streptococcus pneumoniae	Mitis	Streptococcus pneumoniae	SMRU1334	Scaffold	2015/07/13	SC	ftp://ftp.ncbi.nlm.nih.gov/genomes/all/GCF/001/123/985/GCF_001123985.1_6841_7_14
GCF_001124265.1	Y	MG_27	PRJNA224116	SAMEA1028634	F	na	Streptococcus pneumoniae	Mitis	Streptococcus pneumoniae	SMRU2308	Scaffold	2015/07/13	SC	ftp://ftp.ncbi.nlm.nih.gov/genomes/all/GCF/001/124/265/GCF_001124265.1_6983_5_4
GCF_001124305.1	Y	MG_27	PRJNA224116	SAMEA1025112	F	na	Streptococcus pneumoniae	Mitis	Streptococcus pneumoniae	SMRU1257	Scaffold	2015/07/17	SC	ftp://ftp.ncbi.nlm.nih.gov/genomes/all/GCF/001/124/305/GCF_001124305.1_6736_6_9
GCF_001124325.1	Y	MG_27	PRJNA224116	SAMEA2061934	F	na	Streptococcus pneumoniae	Mitis	Streptococcus pneumoniae	38	Scaffold	2015/07/14	SC	ftp://ftp.ncbi.nlm.nih.gov/genomes/all/GCF/001/124/325/GCF_001124325.1_9803_7_68
GCF_001124445.1	Y	MG_27	PRJNA224116	SAMEA1020173	F	na	Streptococcus pneumoniae	Mitis	Streptococcus pneumoniae	SPN13633	Scaffold	2015/07/15	SC	ftp://ftp.ncbi.nlm.nih.gov/genomes/all/GCF/001/124/445/GCF_001124445.1_6570_2_9
GCF_001124645.1	Y	MG_27	PRJNA224116	SAMEA1028733	F	na	Streptococcus pneumoniae	Mitis	Streptococcus pneumoniae	SMRU2410	Scaffold	2015/07/13	SC	ftp://ftp.ncbi.nlm.nih.gov/genomes/all/GCF/001/124/645/GCF_001124645.1_6949_1_10
GCF_001125405.1	Y	MG_27	PRJNA224116	SAMEA1020351	F	na	Streptococcus pneumoniae	Mitis	Streptococcus pneumoniae	SPN22664	Scaffold	2015/07/16	SC	ftp://ftp.ncbi.nlm.nih.gov/genomes/all/GCF/001/125/405/GCF_001125405.1_6570_2_20
GCF_001125625.1	Y	MG_27	PRJNA224116	SAMEA1024106	F	na	Streptococcus pneumoniae	Mitis	Streptococcus pneumoniae	6B	Scaffold	2015/07/11	SC	ftp://ftp.ncbi.nlm.nih.gov/genomes/all/GCF/001/125/625/GCF_001125625.1_6631_6_24
GCF_001125645.1	Y	MG_27	PRJNA224116	SAMEA1024683	F	na	Streptococcus pneumoniae	Mitis	Streptococcus pneumoniae	SMRU701	Scaffold	2015/07/17	SC	ftp://ftp.ncbi.nlm.nih.gov/genomes/all/GCF/001/125/645/GCF_001125645.1_6730_7_5
GCF_001125945.1	Y	MG_27	PRJNA224116	SAMEA974625	F	na	Streptococcus pneumoniae	Mitis	Streptococcus pneumoniae	type strain: N	Scaffold	2015/07/11	SC	ftp://ftp.ncbi.nlm.nih.gov/genomes/all/GCF/001/125/945/GCF_001125945.1_6259_7_23
GCF_001126465.1	Y	MG_27	PRJNA224116	SAMEA1022841	F	na	Streptococcus pneumoniae	Mitis	Streptococcus pneumoniae	16180	Contig	2015/07/14	SC	ftp://ftp.ncbi.nlm.nih.gov/genomes/all/GCF/001/126/465/GCF_001126465.1_5737_2_7
GCF_001126585.1	Y	MG_27	PRJNA224116	SAMEA1024067	F	na	Streptococcus pneumoniae	Mitis	Streptococcus pneumoniae	type strain: N	Contig	2015/07/11	SC	ftp://ftp.ncbi.nlm.nih.gov/genomes/all/GCF/001/126/585/GCF_001126585.1_6631_1_21
GCF_001126825.1	Y	MG_27	PRJNA224116	SAMEA1028975	F	na	Streptococcus pneumoniae	Mitis	Streptococcus pneumoniae	SMRU2486	Scaffold	2015/07/13	SC	ftp://ftp.ncbi.nlm.nih.gov/genomes/all/GCF/001/126/825/GCF_001126825.1_6949_4_14
GCF_001127785.1	Y	MG_27	PRJNA224116	SAMEA1025956	F	na	Streptococcus pneumoniae	Mitis	Streptococcus pneumoniae	SMRU1925	Scaffold	2015/07/13	SC	ftp://ftp.ncbi.nlm.nih.gov/genomes/all/GCF/001/127/785/GCF_001127785.1_6823_4_5
GCF_001128465.1	Y	MG_27	PRJNA224116	SAMEA770064	F	na	Streptococcus pneumoniae	Mitis	Streptococcus pneumoniae	7B/2	Scaffold	2015/07/16	SC	ftp://ftp.ncbi.nlm.nih.gov/genomes/all/GCF/001/128/465/GCF_001128465.1_5192_8_3
GCF_001128525.1	Y	MG_27	PRJNA224116	SAMEA1022916	F	na	Streptococcus pneumoniae	Mitis	Streptococcus pneumoniae	30949	Contig	2015/07/14	SC	ftp://ftp.ncbi.nlm.nih.gov/genomes/all/GCF/001/128/525/GCF_001128525.1_5737_3_1
GCF_001129365.1	Y	MG_27	PRJNA224116	SAMEA1025911	F	na	Streptococcus pneumoniae	Mitis	Streptococcus pneumoniae	SMRU2039	Contig	2015/07/13	SC	ftp://ftp.ncbi.nlm.nih.gov/genomes/all/GCF/001/129/365/GCF_001129365.1_6899_4_23
GCF_001129445.1	Y	MG_27	PRJNA224116	SAMEA1029345	F	na	Streptococcus pneumoniae	Mitis	Streptococcus pneumoniae	SMRU3028	Scaffold	2015/07/14	SC	ftp://ftp.ncbi.nlm.nih.gov/genomes/all/GCF/001/129/445/GCF_001129445.1_7054_4_4
GCF_001129525.1	Y	MG_27	PRJNA224116	SAMEA1023922	F	na	Streptococcus pneumoniae	Mitis	Streptococcus pneumoniae	35F	Contig	2015/07/11	SC	ftp://ftp.ncbi.nlm.nih.gov/genomes/all/GCF/001/129/525/GCF_001129525.1_6631_2_21
GCF_001129685.1	Y	MG_27	PRJNA224116	SAMEA1028858	F	na	Streptococcus pneumoniae	Mitis	Streptococcus pneumoniae	SMRU2518	Scaffold	2015/07/13	SC	ftp://ftp.ncbi.nlm.nih.gov/genomes/all/GCF/001/129/685/GCF_001129685.1_6925_7_22
GCF_001129705.1	Y	MG_27	PRJNA224116	SAMEA1022798	F	na	Streptococcus pneumoniae	Mitis	Streptococcus pneumoniae	30638	Contig	2015/07/14	SC	ftp://ftp.ncbi.nlm.nih.gov/genomes/all/GCF/001/129/705/GCF_001129705.1_5737_2_12
GCF_001129805.1	Y	MG_27	PRJNA224116	SAMEA1022948	F	na	Streptococcus pneumoniae	Mitis	Streptococcus pneumoniae	0256	Contig	2015/07/14	SC	ftp://ftp.ncbi.nlm.nih.gov/genomes/all/GCF/001/129/805/GCF_001129805.1_5750_2_11
GCF_001130365.1	Y	MG_27	PRJNA224116	SAMEA1022781	F	na	Streptococcus pneumoniae	Mitis	Streptococcus pneumoniae	32005	Scaffold	2015/07/14	SC	ftp://ftp.ncbi.nlm.nih.gov/genomes/all/GCF/001/130/365/GCF_001130365.1_5737_2_10
GCF_001130405.1	Y	MG_27	PRJNA224116	SAMEA1029337	F	na	Streptococcus pneumoniae	Mitis	Streptococcus pneumoniae	SMRU3091	Contig	2015/07/14	SC	ftp://ftp.ncbi.nlm.nih.gov/genomes/all/GCF/001/130/405/GCF_001130405.1_7054_6_19
GCF_001130705.1	Y	MG_27	PRJNA224116	SAMEA1023841	F	na	Streptococcus pneumoniae	Mitis	Streptococcus pneumoniae	SMRU209	Contig	2015/07/11	SC	ftp://ftp.ncbi.nlm.nih.gov/genomes/all/GCF/001/130/705/GCF_001130705.1_6680_8_17
GCF_001131025.1	Y	MG_27	PRJNA224116	SAMEA1026135	F	na	Streptococcus pneumoniae	Mitis	Streptococcus pneumoniae	SMRU1756	Scaffold	2015/07/13	SC	ftp://ftp.ncbi.nlm.nih.gov/genomes/all/GCF/001/131/025/GCF_001131025.1_6840_1_4
GCF_001131125.1	Y	MG_27	PRJNA224116	SAMEA1029400	F	na	Streptococcus pneumoniae	Mitis	Streptococcus pneumoniae	SMRU3006	Contig	2015/07/14	SC	ftp://ftp.ncbi.nlm.nih.gov/genomes/all/GCF/001/131/125/GCF_001131125.1_7038_7_6
GCF_001131385.1	Y	MG_27	PRJNA224116	SAMEA1028756	F	na	Streptococcus pneumoniae	Mitis	Streptococcus pneumoniae	SMRU2639	Scaffold	2015/07/13	SC	ftp://ftp.ncbi.nlm.nih.gov/genomes/all/GCF/001/131/385/GCF_001131385.1_6972_5_23
GCF_001131945.1	Y	MG_27	PRJNA224116	SAMEA770051	F	na	Streptococcus pneumoniae	Mitis	Streptococcus pneumoniae	2/3	Scaffold	2015/07/16	SC	ftp://ftp.ncbi.nlm.nih.gov/genomes/all/GCF/001/131/945/GCF_001131945.1_5310_1_1
GCF_001132225.1	Y	MG_27	PRJNA224116	SAMEA1024803	F	na	Streptococcus pneumoniae	Mitis	Streptococcus pneumoniae	SMRU945	Scaffold	2015/07/11	SC	ftp://ftp.ncbi.nlm.nih.gov/genomes/all/GCF/001/132/225/GCF_001132225.1_6680_6_9
GCF_001132485.1	Y	MG_27	PRJNA224116	SAMEA974677	F	na	Streptococcus pneumoniae	Mitis	Streptococcus pneumoniae	10A	Scaffold	2015/07/11	SC	ftp://ftp.ncbi.nlm.nih.gov/genomes/all/GCF/001/132/485/GCF_001132485.1_6259_5_14
GCF_001132745.1	Y	MG_27	PRJNA224116	SAMEA1991756	F	na	Streptococcus pneumoniae	Mitis	Streptococcus pneumoniae	0260	Contig	2015/07/14	SC	ftp://ftp.ncbi.nlm.nih.gov/genomes/all/GCF/001/132/745/GCF_001132745.1_5756_5_1
GCF_001133425.1	Y	MG_27	PRJNA224116	SAMEA1023929	F	na	Streptococcus pneumoniae	Mitis	Streptococcus pneumoniae	type strain: N	Contig	2015/07/11	SC	ftp://ftp.ncbi.nlm.nih.gov/genomes/all/GCF/001/133/425/GCF_001133425.1_6664_1_2
GCF_001133685.1	Y	MG_27	PRJNA224116	SAMEA1025154	F	na	Streptococcus pneumoniae	Mitis	Streptococcus pneumoniae	SMRU1355	Scaffold	2015/07/11	SC	ftp://ftp.ncbi.nlm.nih.gov/genomes/all/GCF/001/133/685/GCF_001133685.1_6710_6_11
GCF_001133885.1	Y	MG_27	PRJNA224116	SAMEA1463136	F	na	Streptococcus pneumoniae	Mitis	Streptococcus pneumoniae	BR1065	Contig	2015/07/29	SC	ftp://ftp.ncbi.nlm.nih.gov/genomes/all/GCF/001/133/885/GCF_001133885.1_7622_2_21
GCF_001134045.1	Y	MG_27	PRJNA224116	SAMEA1028686	F	na	Streptococcus pneumoniae	Mitis	Streptococcus pneumoniae	SMRU2458	Scaffold	2015/07/13	SC	ftp://ftp.ncbi.nlm.nih.gov/genomes/all/GCF/001/134/045/GCF_001134045.1_6949_3_10
GCF_001134085.1	Y	MG_27	PRJNA224116	SAMEA1463093	F	na	Streptococcus pneumoniae	Mitis	Streptococcus pneumoniae	CH2069	Contig	2015/07/29	SC	ftp://ftp.ncbi.nlm.nih.gov/genomes/all/GCF/001/134/085/GCF_001134085.1_7622_3_60
GCF_001134305.1	Y	MG_27	PRJNA224116	SAMEA1023996	F	na	Streptococcus pneumoniae	Mitis	Streptococcus pneumoniae	type strain: N	Scaffold	2015/07/11	SC	ftp://ftp.ncbi.nlm.nih.gov/genomes/all/GCF/001/134/305/GCF_001134305.1_6631_3_9
GCF_001134505.1	Y	MG_27	PRJNA224116	SAMEA1022880	F	na	Streptococcus pneumoniae	Mitis	Streptococcus pneumoniae	0254	Contig	2015/07/14	SC	ftp://ftp.ncbi.nlm.nih.gov/genomes/all/GCF/001/134/505/GCF_001134505.1_5750_2_10
GCF_001134565.1	Y	MG_27	PRJNA224116	SAMEA1025016	F	na	Streptococcus pneumoniae	Mitis	Streptococcus pneumoniae	SMRU597	Scaffold	2015/07/17	SC	ftp://ftp.ncbi.nlm.nih.gov/genomes/all/GCF/001/134/565/GCF_001134565.1_6730_1_21
GCF_001134665.1	Y	MG_27	PRJNA224116	SAMEA1029450	F	na	Streptococcus pneumoniae	Mitis	Streptococcus pneumoniae	SMRU3004	Scaffold	2015/07/14	SC	ftp://ftp.ncbi.nlm.nih.gov/genomes/all/GCF/001/134/665/GCF_001134665.1_7038_7_4
GCF_001134925.1	Y	MG_27	PRJNA224116	SAMEA1026225	F	na	Streptococcus pneumoniae	Mitis	Streptococcus pneumoniae	SMRU1987	Scaffold	2015/07/13	SC	ftp://ftp.ncbi.nlm.nih.gov/genomes/all/GCF/001/134/925/GCF_001134925.1_6823_6_19
GCF_001135565.1	Y	MG_27	PRJNA224116	SAMEA1028924	F	na	Streptococcus pneumoniae	Mitis	Streptococcus pneumoniae	SMRU2467	Scaffold	2015/07/13	SC	ftp://ftp.ncbi.nlm.nih.gov/genomes/all/GCF/001/135/565/GCF_001135565.1_6949_3_19
GCF_001135845.1	Y	MG_27	PRJNA224116	SAMEA1023875	F	na	Streptococcus pneumoniae	Mitis	Streptococcus pneumoniae	23F	Scaffold	2015/07/11	SC	ftp://ftp.ncbi.nlm.nih.gov/genomes/all/GCF/001/135/845/GCF_001135845.1_6631_4_15
GCF_001136205.1	Y	MG_27	PRJNA224116	SAMEA1025226	F	na	Streptococcus pneumoniae	Mitis	Streptococcus pneumoniae	SMRU1240	Scaffold	2015/07/17	SC	ftp://ftp.ncbi.nlm.nih.gov/genomes/all/GCF/001/136/205/GCF_001136205.1_6736_5_16
GCF_001136405.1	Y	MG_27	PRJNA224116	SAMEA1029318	F	na	Streptococcus pneumoniae	Mitis	Streptococcus pneumoniae	SMRU2922	Contig	2015/07/14	SC	ftp://ftp.ncbi.nlm.nih.gov/genomes/all/GCF/001/136/405/GCF_001136405.1_7004_8_90
GCF_001136865.1	Y	MG_27	PRJNA224116	SAMEA1025812	F	na	Streptococcus pneumoniae	Mitis	Streptococcus pneumoniae	SMRU2135	Scaffold	2015/07/13	SC	ftp://ftp.ncbi.nlm.nih.gov/genomes/all/GCF/001/136/865/GCF_001136865.1_6925_3_23
GCF_001137265.1	Y	MG_27	PRJNA224116	SAMEA1463148	F	na	Streptococcus pneumoniae	Mitis	Streptococcus pneumoniae	ND6119	Contig	2015/07/29	SC	ftp://ftp.ncbi.nlm.nih.gov/genomes/all/GCF/001/137/265/GCF_001137265.1_7553_4_7
GCF_001137385.1	Y	MG_27	PRJNA224116	SAMEA1025431	F	na	Streptococcus pneumoniae	Mitis	Streptococcus pneumoniae	SMRU1611	Scaffold	2015/07/13	SC	ftp://ftp.ncbi.nlm.nih.gov/genomes/all/GCF/001/137/385/GCF_001137385.1_6807_3_3
GCF_001137585.1	Y	MG_27	PRJNA224116	SAMEA1028925	F	na	Streptococcus pneumoniae	Mitis	Streptococcus pneumoniae	SMRU2708	Scaffold	2015/07/13	SC	ftp://ftp.ncbi.nlm.nih.gov/genomes/all/GCF/001/137/585/GCF_001137585.1_6938_7_20
GCF_001137785.1	Y	MG_27	PRJNA224116	SAMEA1025727	F	na	Streptococcus pneumoniae	Mitis	Streptococcus pneumoniae	SMRU1878	Scaffold	2015/07/13	SC	ftp://ftp.ncbi.nlm.nih.gov/genomes/all/GCF/001/137/785/GCF_001137785.1_6823_2_6
GCF_001137965.1	Y	MG_27	PRJNA224116	SAMEA1028952	F	na	Streptococcus pneumoniae	Mitis	Streptococcus pneumoniae	SMRU2474	Scaffold	2015/07/13	SC	ftp://ftp.ncbi.nlm.nih.gov/genomes/all/GCF/001/137/965/GCF_001137965.1_6949_4_2
GCF_001138165.1	Y	MG_27	PRJNA224116	SAMEA1023817	F	na	Streptococcus pneumoniae	Mitis	Streptococcus pneumoniae	type strain: N	Scaffold	2015/07/11	SC	ftp://ftp.ncbi.nlm.nih.gov/genomes/all/GCF/001/138/165/GCF_001138165.1_6664_1_14
GCF_001138385.1	Y	MG_27	PRJNA224116	SAMEA770012	F	na	Streptococcus pneumoniae	Mitis	Streptococcus pneumoniae	10F/2	Scaffold	2015/07/16	SC	ftp://ftp.ncbi.nlm.nih.gov/genomes/all/GCF/001/138/385/GCF_001138385.1_5192_8_6
GCF_001138505.1	Y	MG_27	PRJNA224116	SAMEA770006	F	na	Streptococcus pneumoniae	Mitis	Streptococcus pneumoniae	35C/3	Scaffold	2015/07/16	SC	ftp://ftp.ncbi.nlm.nih.gov/genomes/all/GCF/001/138/505/GCF_001138505.1_5192_8_12
GCF_001138565.1	Y	MG_27	PRJNA224116	SAMEA1020322	F	na	Streptococcus pneumoniae	Mitis	Streptococcus pneumoniae	SN4691	Scaffold	2015/07/16	SC	ftp://ftp.ncbi.nlm.nih.gov/genomes/all/GCF/001/138/565/GCF_001138565.1_6289_7_22
GCF_001138765.1	Y	MG_27	PRJNA224116	SAMEA1025287	F	na	Streptococcus pneumoniae	Mitis	Streptococcus pneumoniae	SMRU1638	Scaffold	2015/07/13	SC	ftp://ftp.ncbi.nlm.nih.gov/genomes/all/GCF/001/138/765/GCF_001138765.1_6830_3_6
GCF_001138965.1	Y	MG_27	PRJNA224116	SAMEA1029412	F	na	Streptococcus pneumoniae	Mitis	Streptococcus pneumoniae	SMRU3141	Scaffold	2015/07/14	SC	ftp://ftp.ncbi.nlm.nih.gov/genomes/all/GCF/001/138/965/GCF_001138965.1_7068_4_21
GCF_001139585.1	Y	MG_27	PRJNA224116	SAMEA1020769	F	na	Streptococcus pneumoniae	Mitis	Streptococcus pneumoniae	S-052	Contig	2015/07/16	SC	ftp://ftp.ncbi.nlm.nih.gov/genomes/all/GCF/001/139/585/GCF_001139585.1_6237_8_12
GCF_001139665.1	Y	MG_27	PRJNA224116	SAMEA1029227	F	na	Streptococcus pneumoniae	Mitis	Streptococcus pneumoniae	SMRU3036	Scaffold	2015/07/14	SC	ftp://ftp.ncbi.nlm.nih.gov/genomes/all/GCF/001/139/665/GCF_001139665.1_7054_4_12
GCF_001140105.1	Y	MG_27	PRJNA224116	SAMEA1032535	F	na	Streptococcus pneumoniae	Mitis	Streptococcus pneumoniae	R34-3026	Contig	2015/07/29	SC	ftp://ftp.ncbi.nlm.nih.gov/genomes/all/GCF/001/140/105/GCF_001140105.1_6930_8_20
GCF_001140165.1	Y	MG_27	PRJNA224116	SAMEA1028862	F	na	Streptococcus pneumoniae	Mitis	Streptococcus pneumoniae	SMRU2824	Contig	2015/07/14	SC	ftp://ftp.ncbi.nlm.nih.gov/genomes/all/GCF/001/140/165/GCF_001140165.1_7011_6_16
GCF_001140205.1	Y	MG_27	PRJNA224116	SAMEA1028711	F	na	Streptococcus pneumoniae	Mitis	Streptococcus pneumoniae	SMRU2731	Scaffold	2015/07/13	SC	ftp://ftp.ncbi.nlm.nih.gov/genomes/all/GCF/001/140/205/GCF_001140205.1_6938_8_19
GCF_001140285.1	Y	MG_27	PRJNA224116	SAMEA770016	F	na	Streptococcus pneumoniae	Mitis	Streptococcus pneumoniae	9N/2	Scaffold	2015/07/16	SC	ftp://ftp.ncbi.nlm.nih.gov/genomes/all/GCF/001/140/285/GCF_001140285.1_5242_2_5
GCF_001140505.1	Y	MG_27	PRJNA224116	SAMEA1024603	F	na	Streptococcus pneumoniae	Mitis	Streptococcus pneumoniae	SMRU921	Contig	2015/07/11	SC	ftp://ftp.ncbi.nlm.nih.gov/genomes/all/GCF/001/140/505/GCF_001140505.1_6680_5_9
GCF_001140665.1	Y	MG_27	PRJNA224116	SAMEA1022877	F	na	Streptococcus pneumoniae	Mitis	Streptococcus pneumoniae	0106	Scaffold	2015/07/14	SC	ftp://ftp.ncbi.nlm.nih.gov/genomes/all/GCF/001/140/665/GCF_001140665.1_5919_1_3
GCF_001141005.1	Y	MG_27	PRJNA224116	SAMEA1029201	F	na	Streptococcus pneumoniae	Mitis	Streptococcus pneumoniae	SMRU2988	Contig	2015/07/14	SC	ftp://ftp.ncbi.nlm.nih.gov/genomes/all/GCF/001/141/005/GCF_001141005.1_7038_6_12
GCF_001141145.1	Y	MG_27	PRJNA224116	SAMEA974672	F	na	Streptococcus pneumoniae	Mitis	Streptococcus pneumoniae	33C	Scaffold	2015/07/11	SC	ftp://ftp.ncbi.nlm.nih.gov/genomes/all/GCF/001/141/145/GCF_001141145.1_6259_6_13
GCF_001141245.1	Y	MG_27	PRJNA224116	SAMEA1025737	F	na	Streptococcus pneumoniae	Mitis	Streptococcus pneumoniae	SMRU2111	Scaffold	2015/07/13	SC	ftp://ftp.ncbi.nlm.nih.gov/genomes/all/GCF/001/141/245/GCF_001141245.1_6899_7_23
GCF_001141345.1	Y	MG_27	PRJNA224116	SAMEA1028808	F	na	Streptococcus pneumoniae	Mitis	Streptococcus pneumoniae	SMRU2552	Scaffold	2015/07/13	SC	ftp://ftp.ncbi.nlm.nih.gov/genomes/all/GCF/001/141/345/GCF_001141345.1_6972_2_8
GCF_001141465.1	Y	MG_27	PRJNA224116	SAMEA1022846	F	na	Streptococcus pneumoniae	Mitis	Streptococcus pneumoniae	0233	Contig	2015/07/14	SC	ftp://ftp.ncbi.nlm.nih.gov/genomes/all/GCF/001/141/465/GCF_001141465.1_5750_2_2
GCF_001142065.1	Y	MG_27	PRJNA224116	SAMEA974700	F	na	Streptococcus pneumoniae	Mitis	Streptococcus pneumoniae	6A	Scaffold	2015/07/11	SC	ftp://ftp.ncbi.nlm.nih.gov/genomes/all/GCF/001/142/065/GCF_001142065.1_6259_6_21
GCF_001142105.1	Y	MG_27	PRJNA224116	SAMEA1022845	F	na	Streptococcus pneumoniae	Mitis	Streptococcus pneumoniae	0238	Scaffold	2015/07/14	SC	ftp://ftp.ncbi.nlm.nih.gov/genomes/all/GCF/001/142/105/GCF_001142105.1_5750_2_3
GCF_001143425.1	Y	MG_27	PRJNA224116	SAMEA1024125	F	na	Streptococcus pneumoniae	Mitis	Streptococcus pneumoniae	4	Contig	2015/07/11	SC	ftp://ftp.ncbi.nlm.nih.gov/genomes/all/GCF/001/143/425/GCF_001143425.1_6593_4_15
GCF_001143645.1	Y	MG_27	PRJNA224116	SAMEA1028612	F	na	Streptococcus pneumoniae	Mitis	Streptococcus pneumoniae	SMRU2447	Scaffold	2015/07/13	SC	ftp://ftp.ncbi.nlm.nih.gov/genomes/all/GCF/001/143/645/GCF_001143645.1_6949_2_23
GCF_001143865.1	Y	MG_27	PRJNA224116	SAMEA1022822	F	na	Streptococcus pneumoniae	Mitis	Streptococcus pneumoniae	0175	Scaffold	2015/07/14	SC	ftp://ftp.ncbi.nlm.nih.gov/genomes/all/GCF/001/143/865/GCF_001143865.1_5737_7_10
GCF_001143925.1	Y	MG_27	PRJNA224116	SAMEA1019995	F	na	Streptococcus pneumoniae	Mitis	Streptococcus pneumoniae	1422-00	Scaffold	2015/07/15	SC	ftp://ftp.ncbi.nlm.nih.gov/genomes/all/GCF/001/143/925/GCF_001143925.1_5901_2_7
GCF_001144405.1	Y	MG_27	PRJNA224116	SAMEA1026137	F	na	Streptococcus pneumoniae	Mitis	Streptococcus pneumoniae	SMRU1971	Scaffold	2015/07/13	SC	ftp://ftp.ncbi.nlm.nih.gov/genomes/all/GCF/001/144/405/GCF_001144405.1_6823_6_3
GCF_001144505.1	Y	MG_27	PRJNA224116	SAMEA769999	F	na	Streptococcus pneumoniae	Mitis	Streptococcus pneumoniae	19F/5	Scaffold	2015/07/16	SC	ftp://ftp.ncbi.nlm.nih.gov/genomes/all/GCF/001/144/505/GCF_001144505.1_5310_1_11
GCF_001144525.1	Y	MG_27	PRJNA224116	SAMEA2062391	F	na	Streptococcus pneumoniae	Mitis	Streptococcus pneumoniae	type strain: N	Contig	2015/07/14	SC	ftp://ftp.ncbi.nlm.nih.gov/genomes/all/GCF/001/144/525/GCF_001144525.1_9803_8_68
GCF_001144765.1	Y	MG_27	PRJNA224116	SAMEA1025428	F	na	Streptococcus pneumoniae	Mitis	Streptococcus pneumoniae	SMRU1373	Contig	2015/07/17	SC	ftp://ftp.ncbi.nlm.nih.gov/genomes/all/GCF/001/144/765/GCF_001144765.1_6710_7_5
GCF_001144845.1	Y	MG_27	PRJNA224116	SAMEA1025973	F	na	Streptococcus pneumoniae	Mitis	Streptococcus pneumoniae	SMRU1766	Contig	2015/07/13	SC	ftp://ftp.ncbi.nlm.nih.gov/genomes/all/GCF/001/144/845/GCF_001144845.1_6840_1_14
GCF_001144905.1	Y	MG_27	PRJNA224116	SAMEA1025137	F	na	Streptococcus pneumoniae	Mitis	Streptococcus pneumoniae	SMRU1657	Scaffold	2015/07/18	SC	ftp://ftp.ncbi.nlm.nih.gov/genomes/all/GCF/001/144/905/GCF_001144905.1_6805_4_1
GCF_001145665.1	Y	MG_27	PRJNA224116	SAMEA1028715	F	na	Streptococcus pneumoniae	Mitis	Streptococcus pneumoniae	SMRU2398	Scaffold	2015/07/14	SC	ftp://ftp.ncbi.nlm.nih.gov/genomes/all/GCF/001/145/665/GCF_001145665.1_6983_8_94
GCF_001145745.1	Y	MG_27	PRJNA224116	SAMEA1023860	F	na	Streptococcus pneumoniae	Mitis	Streptococcus pneumoniae	SMRU213	Contig	2015/07/11	SC	ftp://ftp.ncbi.nlm.nih.gov/genomes/all/GCF/001/145/745/GCF_001145745.1_6680_8_21
GCF_001146285.1	Y	MG_27	PRJNA224116	SAMEA1025252	F	na	Streptococcus pneumoniae	Mitis	Streptococcus pneumoniae	SMRU1193	Scaffold	2015/07/18	SC	ftp://ftp.ncbi.nlm.nih.gov/genomes/all/GCF/001/146/285/GCF_001146285.1_6755_6_16
GCF_001146445.1	Y	MG_27	PRJNA224116	SAMEA1024101	F	na	Streptococcus pneumoniae	Mitis	Streptococcus pneumoniae	SMRU258	Contig	2015/07/11	SC	ftp://ftp.ncbi.nlm.nih.gov/genomes/all/GCF/001/146/445/GCF_001146445.1_6673_8_18
GCF_001146685.1	Y	MG_27	PRJNA224116	SAMEA1025976	F	na	Streptococcus pneumoniae	Mitis	Streptococcus pneumoniae	19F	Scaffold	2015/07/13	SC	ftp://ftp.ncbi.nlm.nih.gov/genomes/all/GCF/001/146/685/GCF_001146685.1_6925_5_7
GCF_001146705.1	Y	MG_27	PRJNA224116	SAMEA1025740	F	na	Streptococcus pneumoniae	Mitis	Streptococcus pneumoniae	SMRU1860	Scaffold	2015/07/11	SC	ftp://ftp.ncbi.nlm.nih.gov/genomes/all/GCF/001/146/705/GCF_001146705.1_6823_1_12
GCF_001147125.1	Y	MG_27	PRJNA224116	SAMEA1024797	F	na	Streptococcus pneumoniae	Mitis	Streptococcus pneumoniae	SMRU954	Scaffold	2015/07/11	SC	ftp://ftp.ncbi.nlm.nih.gov/genomes/all/GCF/001/147/125/GCF_001147125.1_6680_6_18
GCF_001147325.1	Y	MG_27	PRJNA224116	SAMEA770007	F	na	Streptococcus pneumoniae	Mitis	Streptococcus pneumoniae	22A/2	Scaffold	2015/07/16	SC	ftp://ftp.ncbi.nlm.nih.gov/genomes/all/GCF/001/147/325/GCF_001147325.1_5192_8_11
GCF_001147625.1	Y	MG_27	PRJNA224116	SAMEA1025043	F	na	Streptococcus pneumoniae	Mitis	Streptococcus pneumoniae	SMRU590	Scaffold	2015/07/18	SC	ftp://ftp.ncbi.nlm.nih.gov/genomes/all/GCF/001/147/625/GCF_001147625.1_6730_1_14
GCF_001148425.1	Y	MG_27	PRJNA224116	SAMEA1025899	F	na	Streptococcus pneumoniae	Mitis	Streptococcus pneumoniae	SMRU2122	Scaffold	2015/07/13	SC	ftp://ftp.ncbi.nlm.nih.gov/genomes/all/GCF/001/148/425/GCF_001148425.1_6925_3_10
GCF_001148705.1	Y	MG_27	PRJNA224116	SAMEA1032530	F	na	Streptococcus pneumoniae	Mitis	Streptococcus pneumoniae	49470	Contig	2015/07/29	SC	ftp://ftp.ncbi.nlm.nih.gov/genomes/all/GCF/001/148/705/GCF_001148705.1_6999_3_15
GCF_001148765.1	Y	MG_27	PRJNA224116	SAMEA1029005	F	na	Streptococcus pneumoniae	Mitis	Streptococcus pneumoniae	SMRU2851	Scaffold	2015/07/14	SC	ftp://ftp.ncbi.nlm.nih.gov/genomes/all/GCF/001/148/765/GCF_001148765.1_7004_6_43
GCF_001148785.1	Y	MG_27	PRJNA224116	SAMEA1026110	F	na	Streptococcus pneumoniae	Mitis	Streptococcus pneumoniae	SMRU2235	Contig	2015/07/14	SC	ftp://ftp.ncbi.nlm.nih.gov/genomes/all/GCF/001/148/785/GCF_001148785.1_7038_8_27
GCF_001149065.1	Y	MG_27	PRJNA224116	SAMEA1024198	F	na	Streptococcus pneumoniae	Mitis	Streptococcus pneumoniae	22F	Contig	2015/07/11	SC	ftp://ftp.ncbi.nlm.nih.gov/genomes/all/GCF/001/149/065/GCF_001149065.1_6593_4_12
GCF_001149665.1	Y	MG_27	PRJNA224116	SAMEA1028935	F	na	Streptococcus pneumoniae	Mitis	Streptococcus pneumoniae	SMRU2416	Scaffold	2015/07/13	SC	ftp://ftp.ncbi.nlm.nih.gov/genomes/all/GCF/001/149/665/GCF_001149665.1_6949_1_16
GCF_001149725.1	Y	MG_27	PRJNA224116	SAMEA1020674	F	na	Streptococcus pneumoniae	Mitis	Streptococcus pneumoniae	PT3026	Contig	2015/07/16	SC	ftp://ftp.ncbi.nlm.nih.gov/genomes/all/GCF/001/149/725/GCF_001149725.1_6569_4_13
GCF_001149985.1	Y	MG_27	PRJNA224116	SAMEA1020059	F	na	Streptococcus pneumoniae	Mitis	Streptococcus pneumoniae	LMG690	Scaffold	2015/07/16	SC	ftp://ftp.ncbi.nlm.nih.gov/genomes/all/GCF/001/149/985/GCF_001149985.1_6187_5_12
GCF_001150225.1	Y	MG_27	PRJNA224116	SAMEA1032419	F	na	Streptococcus pneumoniae	Mitis	Streptococcus pneumoniae	R34-3050	Contig	2015/07/29	SC	ftp://ftp.ncbi.nlm.nih.gov/genomes/all/GCF/001/150/225/GCF_001150225.1_6925_1_68
GCF_001150385.1	Y	MG_27	PRJNA224116	SAMEA1022788	F	na	Streptococcus pneumoniae	Mitis	Streptococcus pneumoniae	0232	Contig	2015/07/14	SC	ftp://ftp.ncbi.nlm.nih.gov/genomes/all/GCF/001/150/385/GCF_001150385.1_6930_7_10
GCF_001150685.1	Y	MG_27	PRJNA224116	SAMEA974662	F	na	Streptococcus pneumoniae	Mitis	Streptococcus pneumoniae	type strain: N	Scaffold	2015/07/11	SC	ftp://ftp.ncbi.nlm.nih.gov/genomes/all/GCF/001/150/685/GCF_001150685.1_6259_5_1
GCF_001151365.1	Y	MG_27	PRJNA224116	SAMEA1025823	F	na	Streptococcus pneumoniae	Mitis	Streptococcus pneumoniae	SMRU2114	Contig	2015/07/13	SC	ftp://ftp.ncbi.nlm.nih.gov/genomes/all/GCF/001/151/365/GCF_001151365.1_6925_3_2
GCF_001151585.1	Y	MG_27	PRJNA224116	SAMEA1026079	F	na	Streptococcus pneumoniae	Mitis	Streptococcus pneumoniae	SMRU1926	Scaffold	2015/07/13	SC	ftp://ftp.ncbi.nlm.nih.gov/genomes/all/GCF/001/151/585/GCF_001151585.1_6823_4_6
GCF_001152025.1	Y	MG_27	PRJNA224116	SAMEA974671	F	na	Streptococcus pneumoniae	Mitis	Streptococcus pneumoniae	type strain: N	Scaffold	2015/07/11	SC	ftp://ftp.ncbi.nlm.nih.gov/genomes/all/GCF/001/152/025/GCF_001152025.1_6259_6_10
GCF_001152045.1	Y	MG_27	PRJNA224116	SAMEA1025757	F	na	Streptococcus pneumoniae	Mitis	Streptococcus pneumoniae	SMRU2133	Contig	2015/07/13	SC	ftp://ftp.ncbi.nlm.nih.gov/genomes/all/GCF/001/152/045/GCF_001152045.1_6925_3_21
GCF_001152225.1	Y	MG_27	PRJNA224116	SAMEA1032715	F	na	Streptococcus pneumoniae	Mitis	Streptococcus pneumoniae	R34-3176	Contig	2015/07/29	SC	ftp://ftp.ncbi.nlm.nih.gov/genomes/all/GCF/001/152/225/GCF_001152225.1_6952_7_16
GCF_001152325.1	Y	MG_27	PRJNA224116	SAMEA1023882	F	na	Streptococcus pneumoniae	Mitis	Streptococcus pneumoniae	SMRU214	Scaffold	2015/07/11	SC	ftp://ftp.ncbi.nlm.nih.gov/genomes/all/GCF/001/152/325/GCF_001152325.1_6680_8_22
GCF_001152405.1	Y	MG_27	PRJNA224116	SAMEA1028863	F	na	Streptococcus pneumoniae	Mitis	Streptococcus pneumoniae	SMRU2602	Contig	2015/07/13	SC	ftp://ftp.ncbi.nlm.nih.gov/genomes/all/GCF/001/152/405/GCF_001152405.1_6972_4_10
GCF_001152485.1	Y	MG_27	PRJNA224116	SAMEA1025166	F	na	Streptococcus pneumoniae	Mitis	Streptococcus pneumoniae	SMRU1405	Contig	2015/07/17	SC	ftp://ftp.ncbi.nlm.nih.gov/genomes/all/GCF/001/152/485/GCF_001152485.1_6710_8_13
GCF_001152605.1	Y	MG_27	PRJNA224116	SAMEA1023844	F	na	Streptococcus pneumoniae	Mitis	Streptococcus pneumoniae	10B	Contig	2015/07/11	SC	ftp://ftp.ncbi.nlm.nih.gov/genomes/all/GCF/001/152/605/GCF_001152605.1_6631_4_13
GCF_001152645.1	Y	MG_27	PRJNA224116	SAMEA1023891	F	na	Streptococcus pneumoniae	Mitis	Streptococcus pneumoniae	28F	Scaffold	2015/07/11	SC	ftp://ftp.ncbi.nlm.nih.gov/genomes/all/GCF/001/152/645/GCF_001152645.1_6631_7_24
GCF_001152725.1	Y	MG_27	PRJNA224116	SAMEA974693	F	na	Streptococcus pneumoniae	Mitis	Streptococcus pneumoniae	type strain: N	Scaffold	2015/07/11	SC	ftp://ftp.ncbi.nlm.nih.gov/genomes/all/GCF/001/152/725/GCF_001152725.1_6259_5_5
GCF_001152865.1	Y	MG_27	PRJNA224116	SAMEA1024727	F	na	Streptococcus pneumoniae	Mitis	Streptococcus pneumoniae	SMRU959	Contig	2015/07/11	SC	ftp://ftp.ncbi.nlm.nih.gov/genomes/all/GCF/001/152/865/GCF_001152865.1_6680_6_23
GCF_001153845.1	Y	MG_27	PRJNA224116	SAMEA1028671	F	na	Streptococcus pneumoniae	Mitis	Streptococcus pneumoniae	SMRU2785	Scaffold	2015/07/14	SC	ftp://ftp.ncbi.nlm.nih.gov/genomes/all/GCF/001/153/845/GCF_001153845.1_7011_5_1
GCF_001153865.1	Y	MG_27	PRJNA224116	SAMEA1023729	F	na	Streptococcus pneumoniae	Mitis	Streptococcus pneumoniae	type strain: N	Scaffold	2015/07/11	SC	ftp://ftp.ncbi.nlm.nih.gov/genomes/all/GCF/001/153/865/GCF_001153865.1_6649_8_16
GCF_001154165.1	Y	MG_27	PRJNA224116	SAMEA1020659	F	na	Streptococcus pneumoniae	Mitis	Streptococcus pneumoniae	DCC2623	Scaffold	2015/07/16	SC	ftp://ftp.ncbi.nlm.nih.gov/genomes/all/GCF/001/154/165/GCF_001154165.1_6569_4_12
GCF_001154325.1	Y	MG_27	PRJNA224116	SAMEA1024892	F	na	Streptococcus pneumoniae	Mitis	Streptococcus pneumoniae	type strain: N	Scaffold	2015/07/11	SC	ftp://ftp.ncbi.nlm.nih.gov/genomes/all/GCF/001/154/325/GCF_001154325.1_6680_4_7
GCF_001154365.1	Y	MG_27	PRJNA224116	SAMEA1029264	F	na	Streptococcus pneumoniae	Mitis	Streptococcus pneumoniae	SMRU3096	Scaffold	2015/07/14	SC	ftp://ftp.ncbi.nlm.nih.gov/genomes/all/GCF/001/154/365/GCF_001154365.1_7054_6_24
GCF_001154505.1	Y	MG_27	PRJNA224116	SAMEA1025832	F	na	Streptococcus pneumoniae	Mitis	Streptococcus pneumoniae	SMRU1996	Scaffold	2015/07/13	SC	ftp://ftp.ncbi.nlm.nih.gov/genomes/all/GCF/001/154/505/GCF_001154505.1_6823_7_4
GCF_001154545.1	Y	MG_27	PRJNA224116	SAMEA770022	F	na	Streptococcus pneumoniae	Mitis	Streptococcus pneumoniae	19F/10	Scaffold	2015/07/16	SC	ftp://ftp.ncbi.nlm.nih.gov/genomes/all/GCF/001/154/545/GCF_001154545.1_5242_2_11
GCF_001154565.1	Y	MG_27	PRJNA224116	SAMEA1025400	F	na	Streptococcus pneumoniae	Mitis	Streptococcus pneumoniae	SMRU1235	Contig	2015/07/17	SC	ftp://ftp.ncbi.nlm.nih.gov/genomes/all/GCF/001/154/565/GCF_001154565.1_6736_5_11
GCF_001154885.1	Y	MG_27	PRJNA224116	SAMEA1028709	F	na	Streptococcus pneumoniae	Mitis	Streptococcus pneumoniae	SMRU2544	Scaffold	2015/07/13	SC	ftp://ftp.ncbi.nlm.nih.gov/genomes/all/GCF/001/154/885/GCF_001154885.1_6925_8_24
GCF_001155505.1	Y	MG_27	PRJNA224116	SAMEA1028714	F	na	Streptococcus pneumoniae	Mitis	Streptococcus pneumoniae	SMRU2441	Scaffold	2015/07/13	SC	ftp://ftp.ncbi.nlm.nih.gov/genomes/all/GCF/001/155/505/GCF_001155505.1_6949_2_17
GCF_001155965.1	Y	MG_27	PRJNA224116	SAMEA1020675	F	na	Streptococcus pneumoniae	Mitis	Streptococcus pneumoniae	S-078	Contig	2015/07/16	SC	ftp://ftp.ncbi.nlm.nih.gov/genomes/all/GCF/001/155/965/GCF_001155965.1_6237_8_13
GCF_001156165.1	Y	MG_27	PRJNA224116	SAMEA1024738	F	na	Streptococcus pneumoniae	Mitis	Streptococcus pneumoniae	SMRU741	Scaffold	2015/07/18	SC	ftp://ftp.ncbi.nlm.nih.gov/genomes/all/GCF/001/156/165/GCF_001156165.1_6730_8_21
[truncated: 12,480 more rows]
